# Supplementary material for: Metabolic clogging of mannose triggers dNTP loss and genomic instability in human cancer cells
Source: eLife journal article supplement (doi:10.7554/elife.83870), 2023-06-13

Figure 1-figure supplement 1-source data 1

full raw unedited blots ( $\beta$ -Actin)

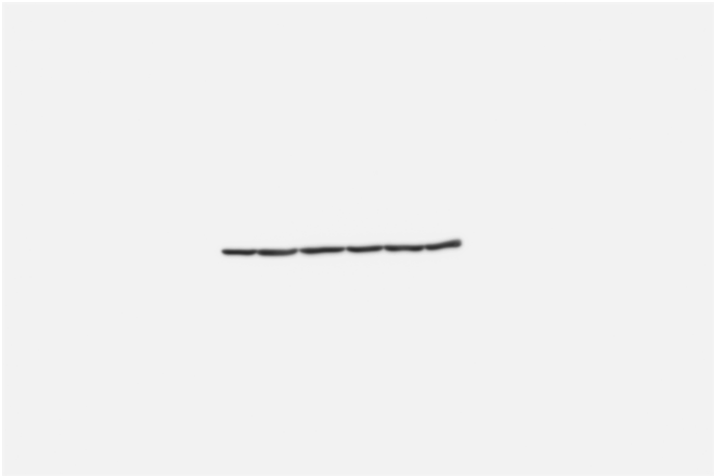

full raw unedited blots (MPI)

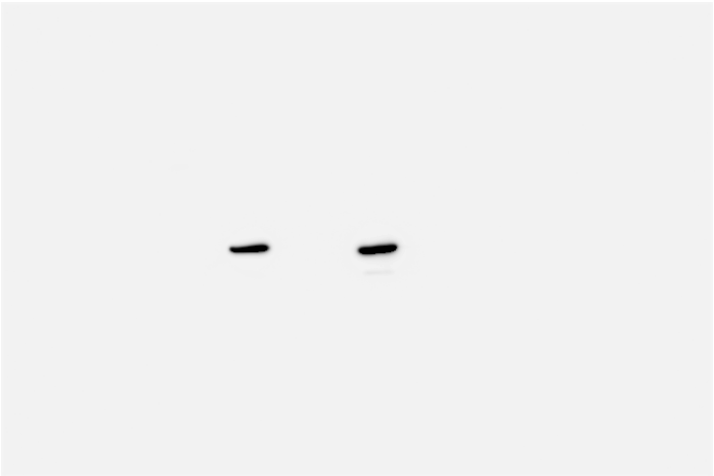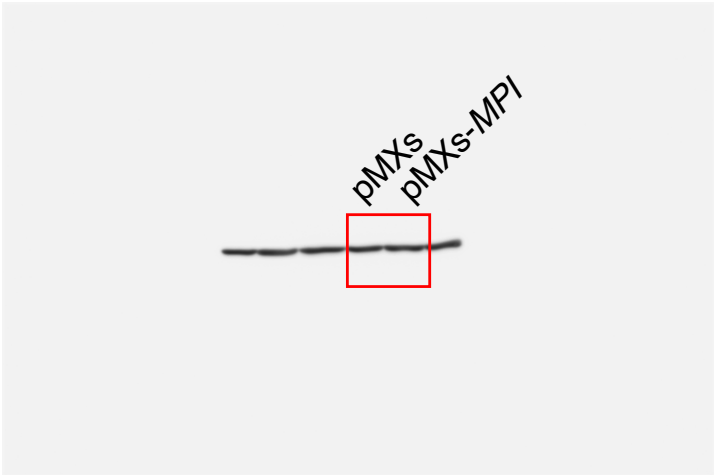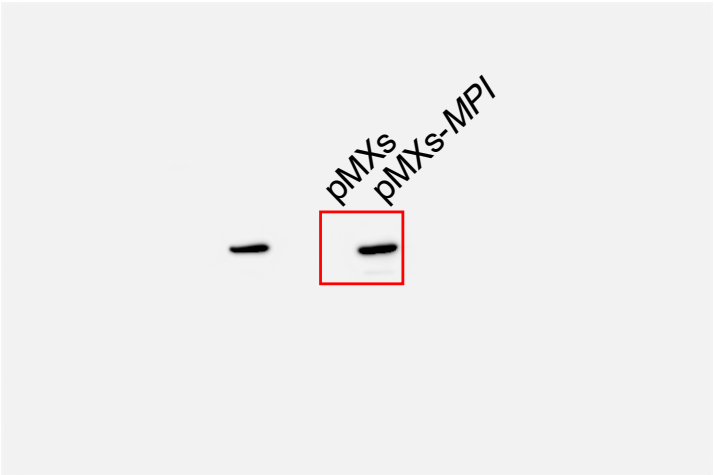

**B** MPI-KO HT1080 (#2)

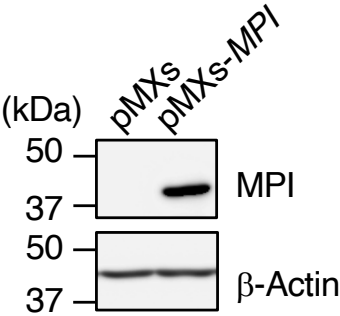

Supplement: fig1-figsupp2-data1 [file elife-83870-fig1-figsupp2-data1-v1.zip]
