# Supplementary material for: Metabolic clogging of mannose triggers dNTP loss and genomic instability in human cancer cells
Source: eLife journal article supplement (doi:10.7554/elife.83870), 2023-06-13

Figure 2-source data 1

full raw unedited blots  
( $\beta$ -Actin)

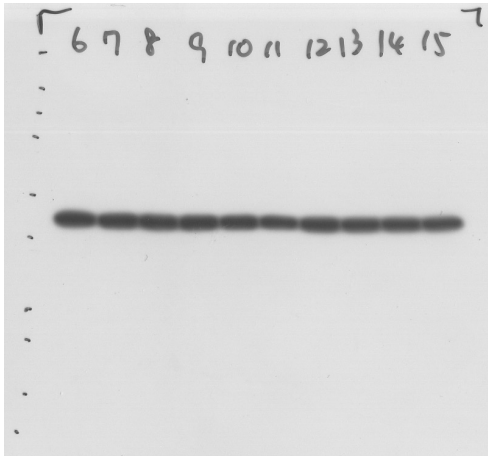

full raw unedited blots  
(P21)

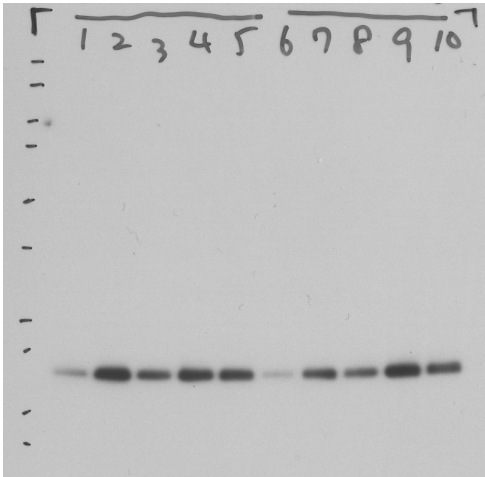

full raw unedited blots  
(P27)

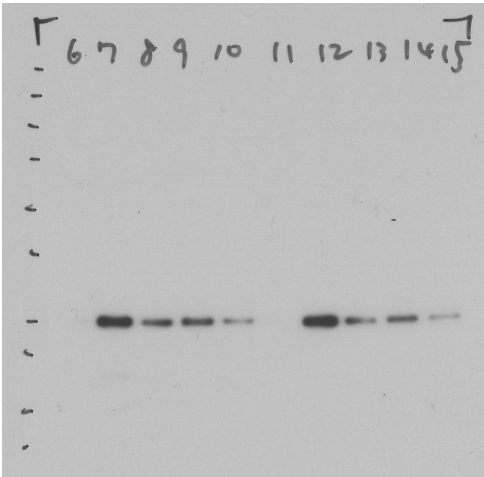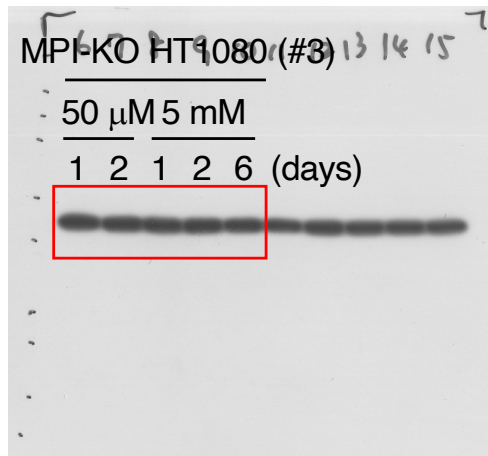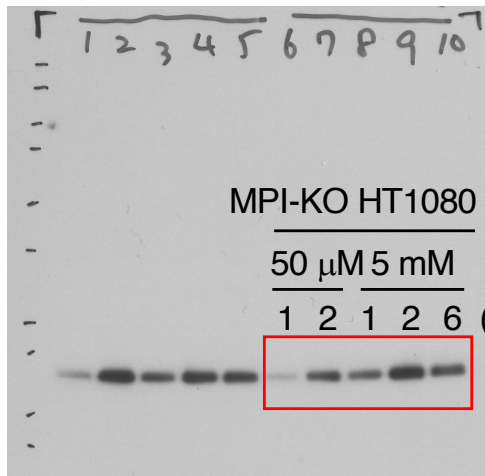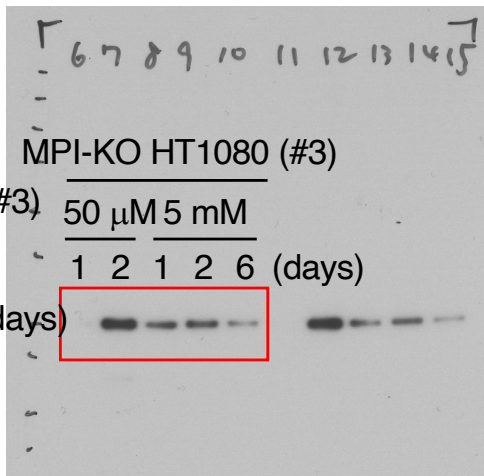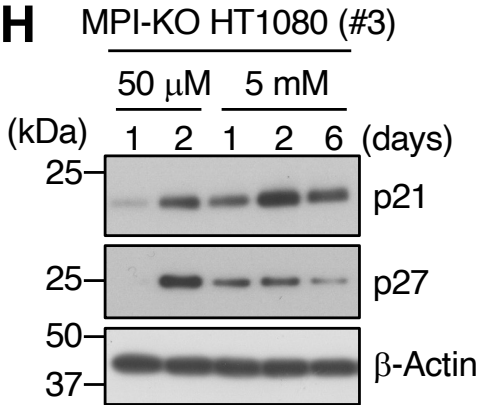

Supplement: fig2-data1 [file elife-83870-fig2-data1-v1.zip]
