# Supplementary material for: Metabolic clogging of mannose triggers dNTP loss and genomic instability in human cancer cells
Source: eLife journal article supplement (doi:10.7554/elife.83870), 2023-06-13

Figure 3-source data 1

full raw unedited blots  
( $\beta$ -Actin)

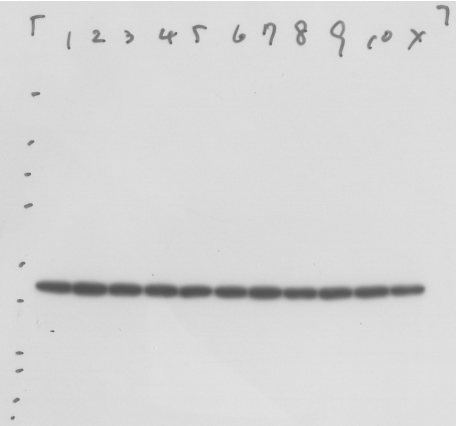

full raw unedited blots  
(MCM2)

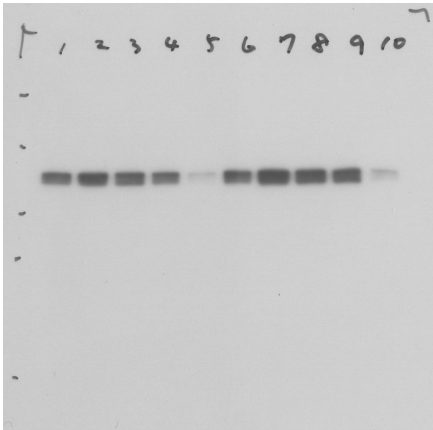

full raw unedited blots  
(MCM3)

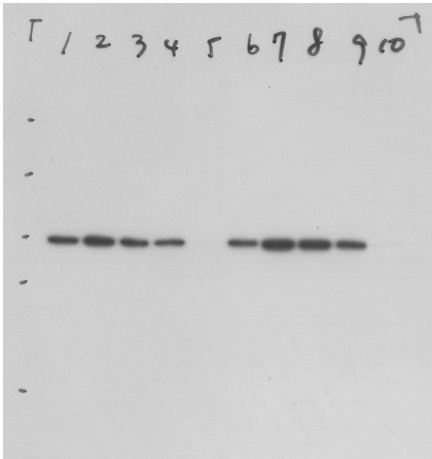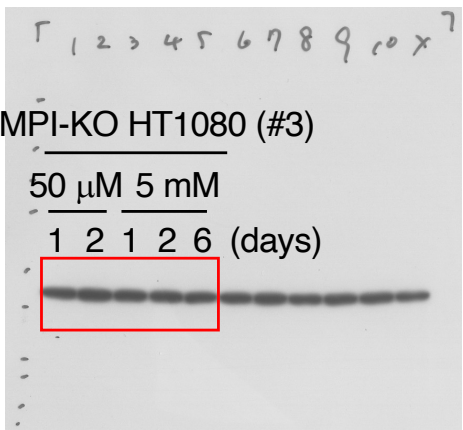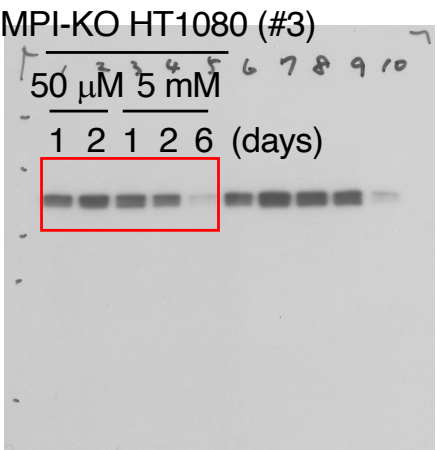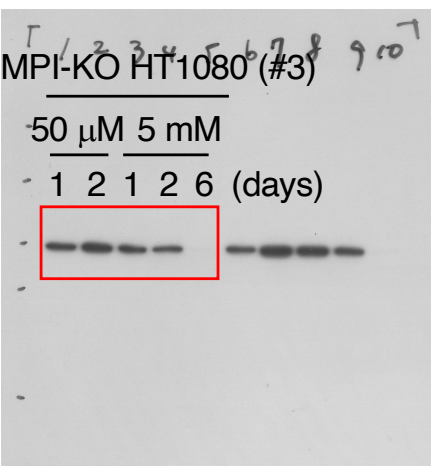

**C** MPI-KO HT1080 (#3)

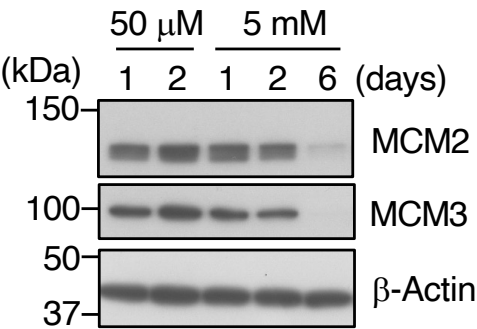

Supplement: fig3-data1 [file elife-83870-fig3-data1-v1.zip]
