# Supplementary material for: Metabolic clogging of mannose triggers dNTP loss and genomic instability in human cancer cells
Source: eLife journal article supplement (doi:10.7554/elife.83870), 2023-06-13

Figure 3-source data 2

full raw unedited blots (MCM4)      full raw unedited blots (MCM5)      full raw unedited blots (MCM6)

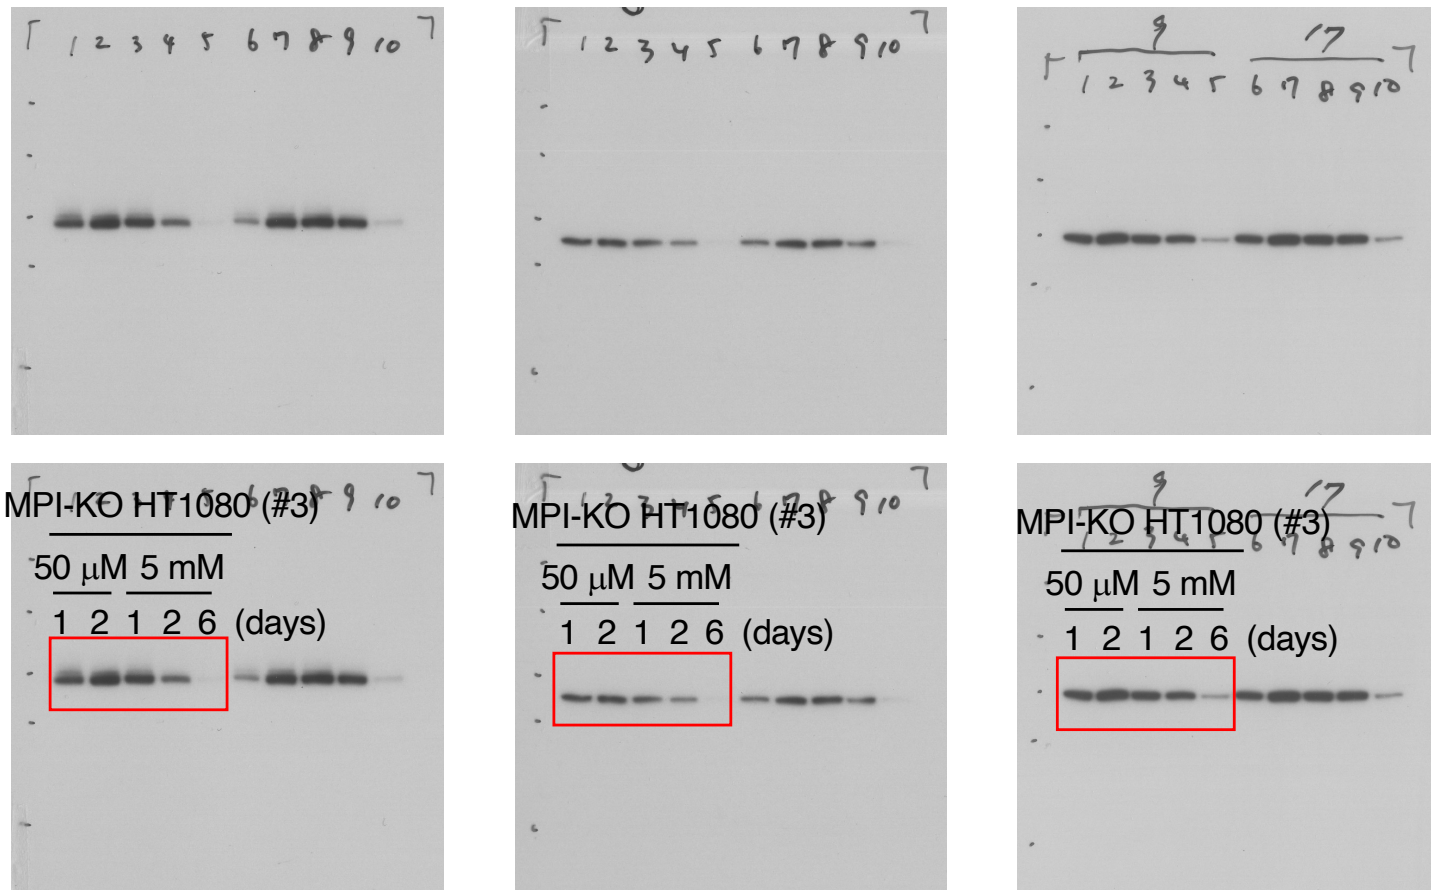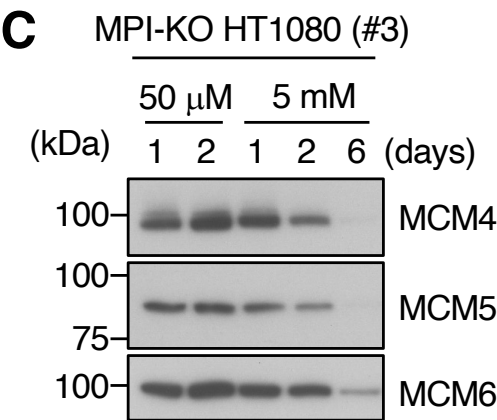

Supplement: fig3-data2 [file elife-83870-fig3-data2-v1.zip]
