# Supplementary material for: Metabolic clogging of mannose triggers dNTP loss and genomic instability in human cancer cells
Source: eLife journal article supplement (doi:10.7554/elife.83870), 2023-06-13

Figure 3-source data 3

full raw unedited blots (MCM7)      full raw unedited blots (CDC6)      full raw unedited blots (CDT1)

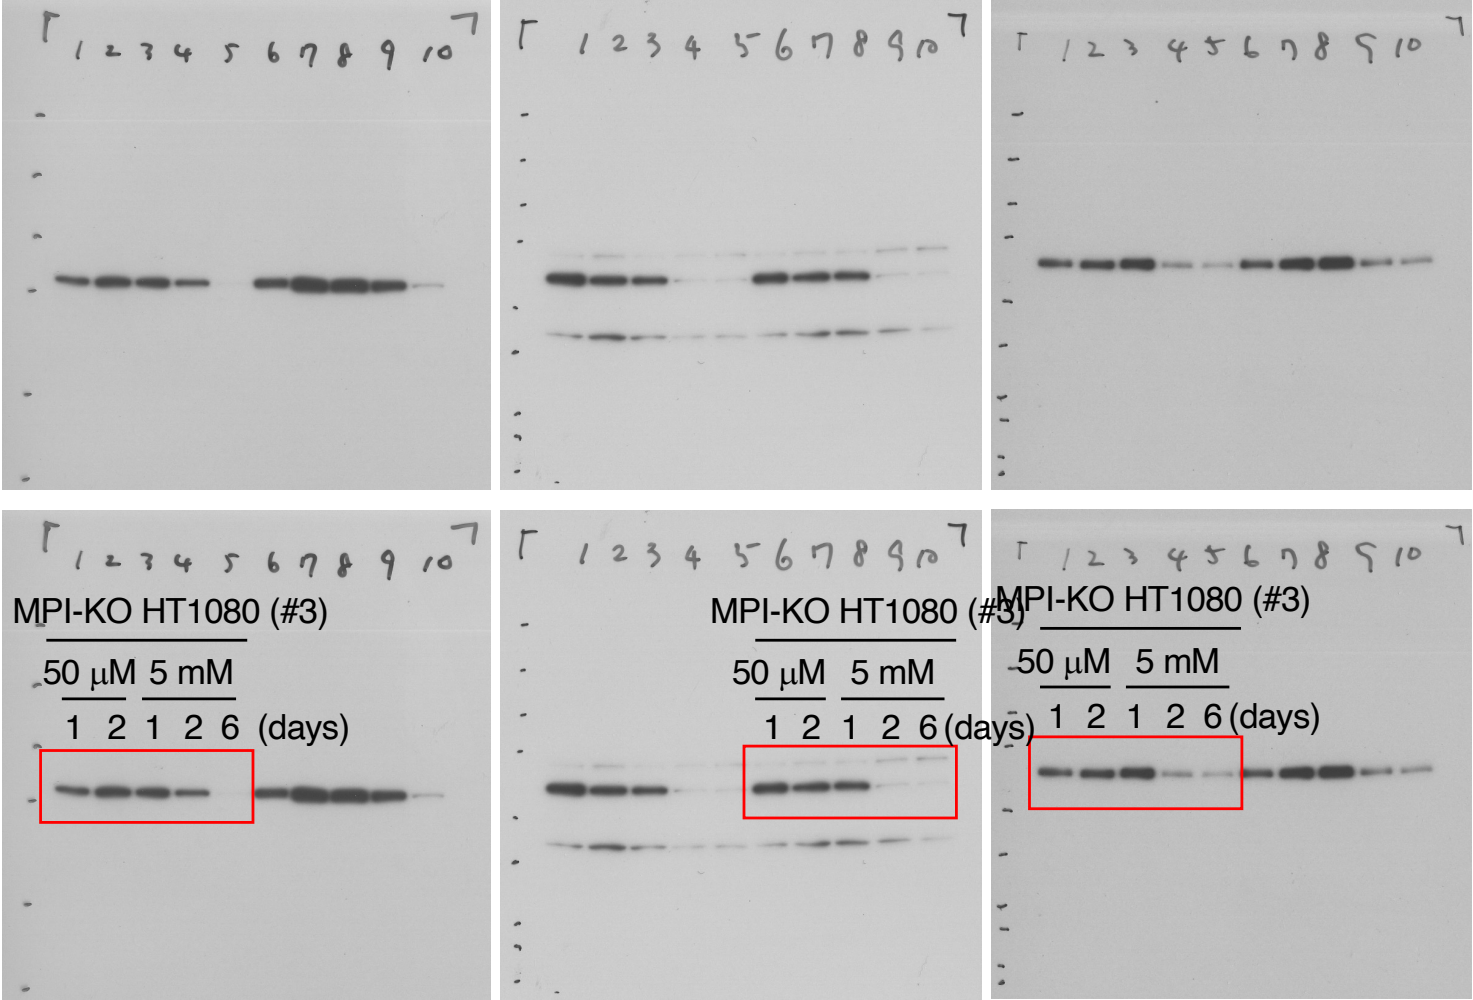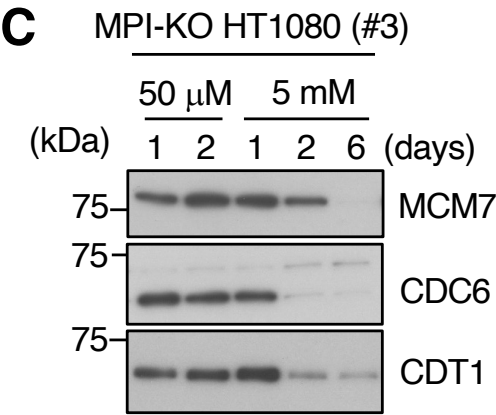

Supplement: fig3-data3 [file elife-83870-fig3-data3-v1.zip]
