# Supplementary material for: Metabolic clogging of mannose triggers dNTP loss and genomic instability in human cancer cells
Source: eLife journal article supplement (doi:10.7554/elife.83870), 2023-06-13

Figure 7-source data 1

full raw unedited blots (β-Actin)      full raw unedited blots (γH2AX)      full raw unedited blots (H2AX)

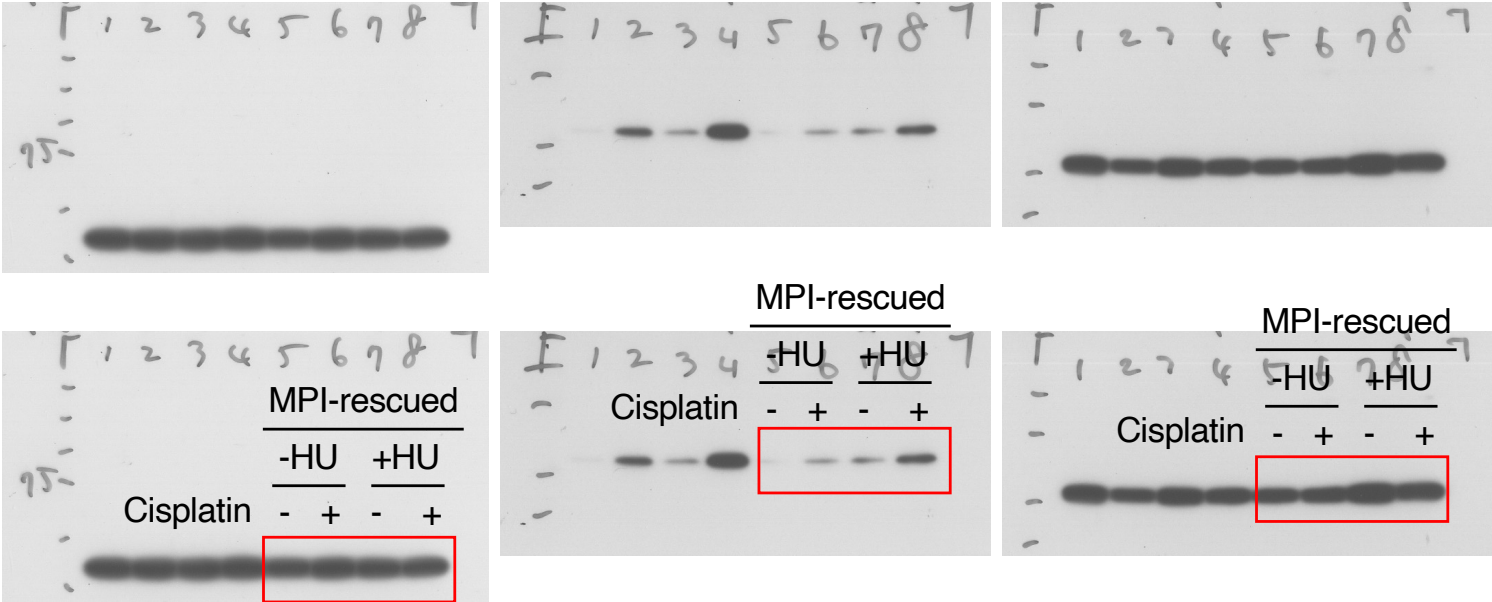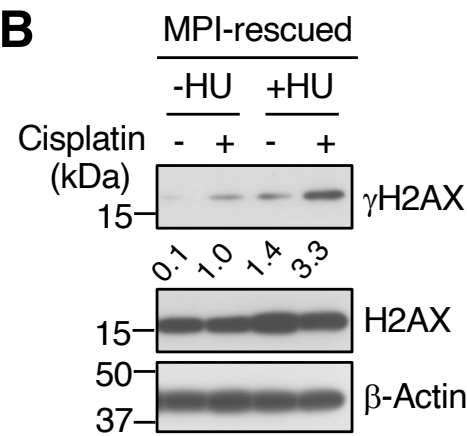

Supplement: fig7-data1 [file elife-83870-fig7-data1-v1.zip]
