# Supplementary material for: Metabolic clogging of mannose triggers dNTP loss and genomic instability in human cancer cells
Source: eLife journal article supplement (doi:10.7554/elife.83870), 2023-06-13

Figure 7-source data 2

Whole cell lysate

full raw unedited blots  
( $\beta$ -Actin)

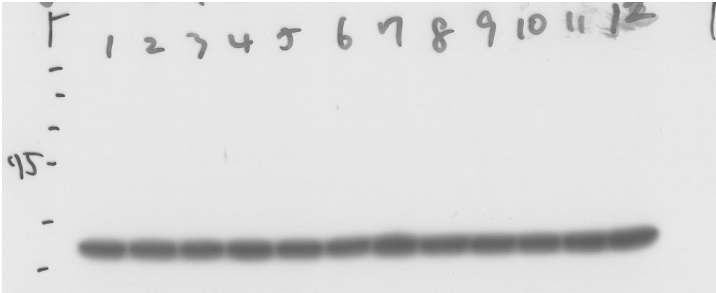

full raw unedited blots  
(pRPA2 (S33))

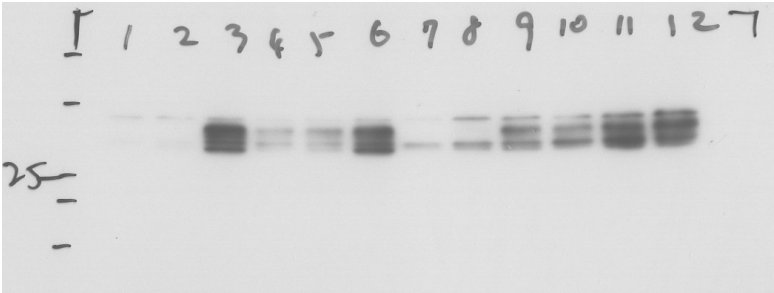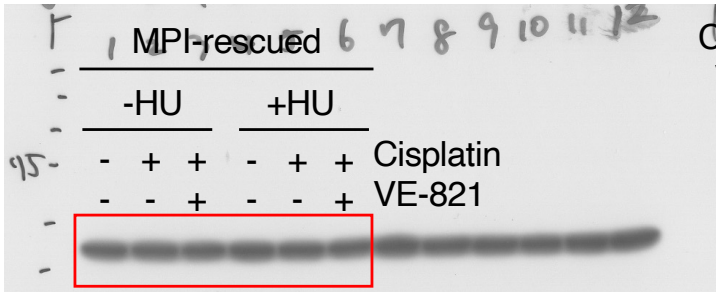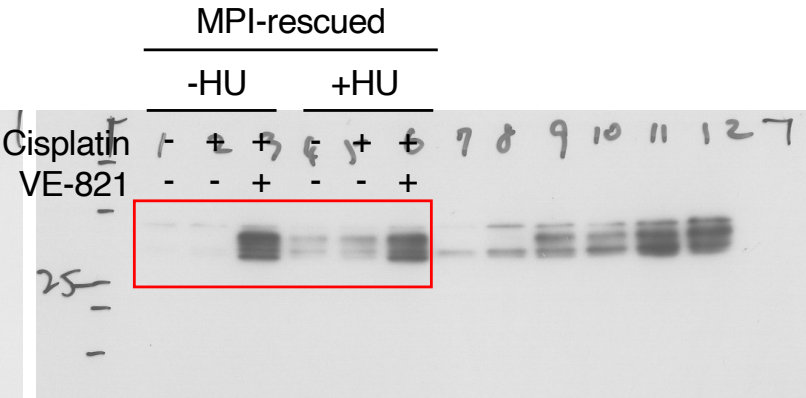

**G**

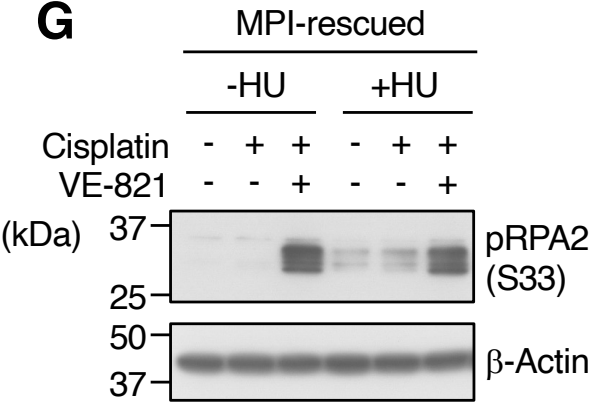

Supplement: fig7-data2 [file elife-83870-fig7-data2-v1.zip]
