# Supplementary material for: Metabolic clogging of mannose triggers dNTP loss and genomic instability in human cancer cells
Source: eLife. 2023 Jul 18;12:e83870. doi: 10.7554/eLife.83870 (PMC10353863; doi:10.7554/eLife.83870)
Supplement: Source data 1. [file elife-83870-data1.xlsx]

## Sheet: Proteins
Checked	Protein FDR Confidence: Combined	Master	Accession	Exp. q-value: Combined	Sum PEP Score	Coverage [%]	# Peptides	# PSMs	# Unique Peptides	# AAs	MW [kDa]	calc. pI	Score Mascot: Mascot	# Peptides (by Search Engine): Mascot	Gene Symbol	Abundance Ratio: (5000uM 24h) / (50uM 24h)	Abundance Ratio: (5000uM 48h) / (50uM 24h)	Abundance Ratio: (5000uM 6Days) / (50uM 24h)	Abundance Ratio: (50uM 48h) / (50uM 24h)	Abundance Ratio Adj. P-Value: (5000uM 24h) / (50uM 24h)	Abundance Ratio Adj. P-Value: (5000uM 48h) / (50uM 24h)	Abundance Ratio Adj. P-Value: (5000uM 6Days) / (50uM 24h)	Abundance Ratio Adj. P-Value: (50uM 48h) / (50uM 24h)
FALSE	High	Master Protein	XP_005251037.1	0	2623.47	68	308	5710	2	4552	516.6	5.81	87820	308	PLEC	0.859	0.921	1.19	0.993	0.882821	0.936028	0.907418	0.978527
	Checked	Confidence	Annotated Sequence	Qvality PEP	Qvality q-value	# Protein Groups	# Proteins	# PSMs	Master Protein Accessions	Positions in Master Proteins	Modifications in Master Proteins	# Missed Cleavages	Theo. MH+ [Da]	Abundance Ratio: (5000uM 24h) / (50uM 24h)	Abundance Ratio Adj. P-Value: (5000uM 6Days) / (50uM 24h)	Abundances (Grouped): 5000uM 6Days	Abundances (Grouped): 50uM 24h	Abundances (Grouped): 50uM 48h	Abundances (Grouped) CV [%]: 5000uM 24h	Abundances (Grouped) CV [%]: 5000uM 48h	Abundances (Grouped) CV [%]: 5000uM 6Days	Abundances (Grouped) CV [%]: 50uM 24h	Abundances (Grouped) CV [%]: 50uM 48h
	FALSE	High	[R].AAEEAEEAR.[V]	0.000480964	4.2772e-05	4	26	72	CAA91196.1; XP_005251037.1; EAW82172.1; XP_011515432.1	CAA91196.1 [2226-2234]; XP_005251037.1 [2094-2102]; EAW82172.1 [2116-2124]; XP_011515432.1 [2094-2102]		0	975.438	0.894	0.828213	126.5	84.7	134.8	33.95	47.89	14.63	14.82	19.32
	FALSE	High	[R].AALAHSEEVTASQVAATK.[T]	1.96117e-15	1.93435e-05	3	25	27	CAA91196.1; XP_005251037.1; XP_011515432.1	CAA91196.1 [2744-2761]; XP_005251037.1 [2612-2629]; XP_011515432.1 [2612-2629]		0	1783.92	1.073	0.587235	144.6	81.3	79.5	7.65	7.75	19.6	5.44	5.68
	FALSE	High	[K].AALEEVER.[L]	0.00561564	0.000596903	4	26	9	CAA91196.1; XP_005251037.1; EAW82172.1; XP_011515432.1	CAA91196.1 [2143-2150]; XP_005251037.1 [2011-2018]; EAW82172.1 [2033-2040]; XP_011515432.1 [2011-2018]		0	916.473	1.046	0.849901	133.3	92.9	82.7	9.35	4.31	5.74	1.22	4.32
	FALSE	Medium	[K].ADSMIR.[L]	0.396533	0.0308312	4	26	19	CAA91196.1; XP_005251037.1; EAW82172.1; XP_011515432.1	CAA91196.1 [582-587]; XP_005251037.1 [450-455]; EAW82172.1 [472-477]; XP_011515432.1 [450-455]		0	692.34	0.775	0.964939	96.8	107	92.3	42.19	24.87	25.42	22.94	7.59
	FALSE	High	[K].AEAELLQQQK.[E]	4.61805e-05	1.93435e-05	4	25	13	CAA91196.1; XP_005251037.1; EAW82172.1; XP_011515432.1	CAA91196.1 [2464-2473]; XP_005251037.1 [2332-2341]; EAW82172.1 [2354-2363]; XP_011515432.1 [2332-2341]		0	1157.62	1.331	0.945058	108.1	83.5	77.6	33.76	8.96	5.56	27.82	3.97
	FALSE	High	[K].AELELELGR.[I]	0.00193751	0.000154191	4	26	21	CAA91196.1; XP_005251037.1; EAW82172.1; XP_011515432.1	CAA91196.1 [2079-2087]; XP_005251037.1 [1947-1955]; EAW82172.1 [1969-1977]; XP_011515432.1 [1947-1955]		0	1029.56	0.627	0.979691	127.7	110.3	110.7	6.41	11.79	3.89	20.29	1.24
	FALSE	High	[R].AEMEVLLASK.[A]	0.000439957	4.2772e-05	4	26	6	CAA91196.1; XP_005251037.1; EAW82172.1; XP_011515432.1	CAA91196.1 [1899-1908]; XP_005251037.1 [1767-1776]; EAW82172.1 [1789-1798]; XP_011515432.1 [1767-1776]		0	1090.58	0.579	0.912412	142.4	107.2	83.6	15.63	2.38	10.27	19.12	1.82
	FALSE	High	[K].AEVVETTQVYTEEETR.[R]	9.19557e-12	1.93435e-05	2	25	30	XP_005251037.1; XP_011515432.1	XP_005251037.1 [3554-3569]; XP_011515432.1 [3554-3569]		0	1883.89	1.146	0.734343	128.9	63.9	58.1	25.05	7.06	21.17	33.39	8.27
	FALSE	High	[K].AEVVETTQVYTEEETRR.[A]	3.9127e-06	1.93435e-05	2	25	6	XP_005251037.1; XP_011515432.1	XP_005251037.1 [3554-3570]; XP_011515432.1 [3554-3570]		1	2039.99	0.215	0.0952316	72.2	162.1	189.2	21.87	7.82	16.54	33.51	9.45
	FALSE	High	[K].AFCGFEDPR.[T]	0.00754448	0.000738505	3	26	9	CAA91196.1; XP_005251037.1; XP_011515432.1	CAA91196.1 [4492-4500]; XP_005251037.1 [4360-4368]; XP_011515432.1 [4360-4368]		0	1099.45	0.852	0.945557	99.5	110.2	113.5	19.37	14.34	3.82	0.97	7.46
	FALSE	High	[R].AGLVGPEFHEK.[L]	4.76081e-06	1.93435e-05	3	25	31	CAA91196.1; XP_005251037.1; XP_011515432.1	CAA91196.1 [3221-3231]; XP_005251037.1 [3089-3099]; XP_011515432.1 [3089-3099]		0	1183.61	1.048	0.902229	110.4	90.5	95.9	16.12	5.48	31.84	10.55	25.64
	FALSE	High	[R].AGTLSITEFADMLSGNAGGFR.[S]	6.80849e-14	1.93435e-05	3	26	6	CAA91196.1; XP_005251037.1; XP_011515432.1	CAA91196.1 [4361-4381]; XP_005251037.1 [4229-4249]; XP_011515432.1 [4229-4249]		0	2115.02	0.468	0.719368	78	125.4	158.8	6.13	54.73	49.97	52.58	17.42
	FALSE	High	[R].AGTLSITEFADMLSGNAGGFR.[S]	2.07383e-12	1.93435e-05	3	26	9	CAA91196.1; XP_005251037.1; XP_011515432.1	CAA91196.1 [4361-4381]; XP_005251037.1 [4229-4249]; XP_011515432.1 [4229-4249]		0	2131.01	8.319	0.0315582	95.1	16.6	148.8	3.78	31.88	42.14	107.32	50.99
	FALSE	High	[K].AGVAAPATQVAQVTLQSVQR.[R]	2.41294e-09	1.93435e-05	3	24	15	CAA91196.1; XP_005251037.1; XP_011515432.1	CAA91196.1 [631-650]; XP_005251037.1 [499-518]; XP_011515432.1 [499-518]		0	1995.1	0.534	0.960562	121.6	110.5	130.2	13.74	17.34	23.99	26.77	28.13
	FALSE	High	[K].AGVVGPELHEQLLSAEK.[A]	2.39519e-13	1.93435e-05	3	25	23	CAA91196.1; XP_005251037.1; XP_011515432.1	CAA91196.1 [3552-3568]; XP_005251037.1 [3420-3436]; XP_011515432.1 [3420-3436]		0	1776.95	1.296	0.860423	120.7	76.2	95.9	13.48	9.24	21.7	35.72	18.71
	FALSE	High	[K].AHAFAVQQK.[E]	0.000453225	4.2772e-05	4	26	8	CAA91196.1; XP_005251037.1; EAW82172.1; XP_011515432.1	CAA91196.1 [2190-2198]; XP_005251037.1 [2058-2066]; EAW82172.1 [2080-2088]; XP_011515432.1 [2058-2066]		0	999.537	0.886	0.931953	94.3	105.1	123	8.63	23.02	9.48	14.16	10.35
	FALSE	High	[K].AKLEQLFQDEVAK.[A]	4.04405e-10	1.93435e-05	3	25	14	CAA91196.1; XP_005251037.1; XP_011515432.1	CAA91196.1 [2651-2663]; XP_005251037.1 [2519-2531]; XP_011515432.1 [2519-2531]		1	1518.82	0.542	0.996148	108.4	100.3	148.7	22.71	9.17	7.39	13.3	9.62
	FALSE	High	[R].ALAEEAK.[R]	0.114749	0.00835447	4	26	9	CAA91196.1; XP_005251037.1; EAW82172.1; XP_011515432.1	CAA91196.1 [1945-1951]; XP_005251037.1 [1813-1819]; EAW82172.1 [1835-1841]; XP_011515432.1 [1813-1819]		0	731.393	0.724	0.905657	113.5	123.6	62.3	18.28	12.56	11.71	44.5	8.57
	FALSE	High	[R].ALQALEELR.[L]	0.00140375	0.000154191	4	25	23	CAA91196.1; XP_005251037.1; EAW82172.1; XP_011515432.1	CAA91196.1 [1671-1679]; XP_005251037.1 [1539-1547]; EAW82172.1 [1561-1569]; XP_011515432.1 [1539-1547]		0	1042.59	0.854	0.978468	115.8	107.1	99.3	20.55	16.83	5.5	11.64	9.7
	FALSE	High	[R].ANELQLR.[W]	0.0450411	0.0036071	3	25	19	CAA91196.1; XP_005251037.1; EAW82172.1	CAA91196.1 [411-417]; XP_005251037.1 [279-285]; EAW82172.1 [301-307]		0	843.468	0.833	0.954762	134.2	103.3	96.5	2.13	5.86	3.24	9.79	3.8
	FALSE	High	[R].APVPASELLASGVLSR.[A]	3.10889e-08	1.93435e-05	2	24	1	XP_005251037.1; XP_011515432.1	XP_005251037.1 [3315-3330]; XP_011515432.1 [3315-3330]		0	1566.88	0.701	0.71028	82.6	127.1	133.1	9.14	9.43	8.3	19.21	5.58
	FALSE	High	[R].AQAEAQQPTFDALR.[D]	5.00489e-09	1.93435e-05	4	26	22	CAA91196.1; XP_005251037.1; EAW82172.1; XP_011515432.1	CAA91196.1 [1274-1287]; XP_005251037.1 [1142-1155]; EAW82172.1 [1164-1177]; XP_011515432.1 [1142-1155]		0	1545.77	1.375	0.981655	106.8	102.7	57.4	13.16	5.86	10.09	19.5	5.05
	FALSE	High	[R].AQAEAQQPTFDALRDELR.[G]	6.24671e-06	1.93435e-05	4	26	11	CAA91196.1; XP_005251037.1; EAW82172.1; XP_011515432.1	CAA91196.1 [1274-1291]; XP_005251037.1 [1142-1159]; EAW82172.1 [1164-1181]; XP_011515432.1 [1142-1159]		1	2059.02	0.244	0.250945	68.8	129.1	230.9	7.07	18.54	5.91	35.28	1.69
	FALSE	High	[R].AQAEQAALR.[Q]	0.00368065	0.000427246	4	26	12	CAA91196.1; XP_005251037.1; EAW82172.1; XP_011515432.1	CAA91196.1 [2287-2295]; XP_005251037.1 [2155-2163]; EAW82172.1 [2177-2185]; XP_011515432.1 [2155-2163]		0	957.511	100	6.09287e-17	214.4			12.06	6.01	16.94
	FALSE	High	[K].AQAEVEGLGK.[G]	0.000703458	9.10162e-05	4	26	30	CAA91196.1; XP_005251037.1; EAW82172.1; XP_011515432.1	CAA91196.1 [1166-1175]; XP_005251037.1 [1034-1043]; EAW82172.1 [1056-1065]; XP_011515432.1 [1034-1043]		0	1001.53	0.98	0.978144	116.4	97.9	102.8	4.64	4.35	9.07	4.7	3.18
	FALSE	Medium	[R].AQFEQLK.[D]	0.172327	0.0120386	3	25	16	CAA91196.1; XP_005251037.1; XP_011515432.1	CAA91196.1 [3463-3469]; XP_005251037.1 [3331-3337]; XP_011515432.1 [3331-3337]		0	863.462	0.911	0.95256	111.3	96.6	107.8	11.98	8.37	7.84	3.69	5.73
	FALSE	High	[R].AQFEQLKDGK.[T]	0.139689	0.00997024	3	25	1	CAA91196.1; XP_005251037.1; XP_011515432.1	CAA91196.1 [3463-3472]; XP_005251037.1 [3331-3340]; XP_011515432.1 [3331-3340]		1	1163.61
	FALSE	High	[K].AQLEPVASPAK.[K]	9.55152e-05	1.93435e-05	4	26	31	CAA91196.1; XP_005251037.1; EAW82172.1; XP_011515432.1	CAA91196.1 [1428-1438]; XP_005251037.1 [1296-1306]; EAW82172.1 [1318-1328]; XP_011515432.1 [1296-1306]		0	1110.62	1.062	0.676377	139.9	87.8	102.9	13.91	1.02	3.45	10.07	6.03
	FALSE	High	[R].AQLMADFQAGR.[V]	6.11595e-05	1.93435e-05	3	26	14	CAA91196.1; XP_005251037.1; XP_011515432.1	CAA91196.1 [3739-3749]; XP_005251037.1 [3607-3617]; XP_011515432.1 [3607-3617]		0	1207.59	0.553	0.925519	125.6	119.5	99.8	20.39	31.06	25.31	12.83	12.98
	FALSE	High	[R].AQLMADFQAGR.[V]	0.0001155	1.93435e-05	3	26	18	CAA91196.1; XP_005251037.1; XP_011515432.1	CAA91196.1 [3739-3749]; XP_005251037.1 [3607-3617]; XP_011515432.1 [3607-3617]		0	1223.58	1.158	0.472006	146	78.6	97.5	22.18	61.32	36.63	49.09	70.57
	FALSE	High	[K].AQVEQELTTLR.[L]	2.56608e-05	1.93435e-05	4	26	18	CAA91196.1; XP_005251037.1; EAW82172.1; XP_011515432.1	CAA91196.1 [2319-2329]; XP_005251037.1 [2187-2197]; EAW82172.1 [2209-2219]; XP_011515432.1 [2187-2197]		0	1287.69	0.809	0.967572	124.3	105.4	92.5	2.87	5.22	5.42	33.85	3.8
	FALSE	High	[R].ARQEELYSELQAR.[E]	9.01806e-06	1.93435e-05	2	24	8	XP_005251037.1; XP_011515432.1	XP_005251037.1 [3224-3236]; XP_011515432.1 [3224-3236]		1	1592.8	0.502	0.815519	70.7	77.8	265.4	48.47	18.7	10.86	53.08	9.29
	FALSE	High	[K].ASDSELER.[Q]	0.0164146	0.00142738	4	26	38	CAA91196.1; XP_005251037.1; EAW82172.1; XP_011515432.1	CAA91196.1 [2038-2045]; XP_005251037.1 [1906-1913]; EAW82172.1 [1928-1935]; XP_011515432.1 [1906-1913]		0	906.416	0.829	0.333822	72.5	130.8	78.4	13.42	24.58	7.86	14.2	20.82
	FALSE	High	[R].ATTAALLLEAQAATGFLVDPVR.[N]	1.37091e-10	1.93435e-05	2	24	6	XP_005251037.1; XP_011515432.1	XP_005251037.1 [3387-3408]; XP_011515432.1 [3387-3408]		0	2228.23	1.03	0.743242	68.9	117.6	102.1	7.55	3.53	8.67	5.55	8.07
	FALSE	High	[K].ATVSAPFGK.[F]	0.0107783	0.000970585	3	25	34	CAA91196.1; XP_005251037.1; XP_011515432.1	CAA91196.1 [3045-3053]; XP_005251037.1 [2913-2921]; XP_011515432.1 [2913-2921]		0	877.478	0.79	0.891157	103.8	110.8	120.5	2.65	6.26	4.58	4.82	7.79
	FALSE	High	[R].AVTGYKDPYSGK.[L]	3.99242e-05	1.93435e-05	3	26	8	CAA91196.1; XP_005251037.1; XP_011515432.1	CAA91196.1 [4147-4158]; XP_005251037.1 [4015-4026]; XP_011515432.1 [4015-4026]		1	1285.64	2.693	0.988236	79.2	42.4	167.4	0.7		15.48	74	6.25
	FALSE	High	[R].AVTGYKDPYTGQQISLFQAMQK.[G]	3.50276e-06	1.93435e-05	3	25	1	CAA91196.1; XP_005251037.1; XP_011515432.1	CAA91196.1 [2910-2931]; XP_005251037.1 [2778-2799]; XP_011515432.1 [2778-2799]		1	2474.24
	FALSE	High	[K].AVVQLKPR.[H]	0.0010887	0.000154191	4	26	36	CAA91196.1; XP_005251037.1; EAW82172.1; XP_011515432.1	CAA91196.1 [927-934]; XP_005251037.1 [795-802]; EAW82172.1 [817-824]; XP_011515432.1 [795-802]		0	910.583	0.822	0.868553	96.4	128.1	117.1	12.83	3.61	6.85	31.89	20.56
	FALSE	High	[K].AYSDPSTGEPATYGELQQR.[C]	1.02918e-15	1.93435e-05	3	25	17	CAA91196.1; XP_005251037.1; XP_011515432.1	CAA91196.1 [3317-3335]; XP_005251037.1 [3185-3203]; XP_011515432.1 [3185-3203]		0	2069.94	0.944	0.888895	129.9	87.4	85.2	15.67	7.31	6.51	12.68	13.86
	FALSE	High	[R].CDNFTSSWR.[D]	0.000772392	9.10162e-05	4	26	24	CAA91196.1; XP_005251037.1; EAW82172.1; XP_011515432.1	CAA91196.1 [317-325]; XP_005251037.1 [185-193]; EAW82172.1 [207-215]; XP_011515432.1 [189-197]		0	1173.46	0.882	0.987247	104.3	105.1	109.6	6.67	3	5.78	9.37	6.1
	FALSE	High	[R].CITDPQTGLCLLPLK.[E]	1.48036e-12	1.93435e-05	3	26	6	CAA91196.1; XP_005251037.1; XP_011515432.1	CAA91196.1 [4245-4259]; XP_005251037.1 [4113-4127]; XP_011515432.1 [4113-4127]		0	1730.87	0.858	1	114.2	108.9	95.8	4.96	6.19	7.75	8.93	9.16
	FALSE	High	[R].CRPDQLTGLSLLPLSEK.[A]	1.54686e-10	1.93435e-05	3	25	2	CAA91196.1; XP_005251037.1; XP_011515432.1	CAA91196.1 [3336-3352]; XP_005251037.1 [3204-3220]; XP_011515432.1 [3204-3220]		0	1928.02	0.01	6.09287e-17		241.7	258.3				22.11	10.14
	FALSE	High	[R].CVEDPETGLCLLPLTDK.[A]	1.75891e-14	1.93435e-05	3	25	15	CAA91196.1; XP_005251037.1; XP_011515432.1	CAA91196.1 [3008-3024]; XP_005251037.1 [2876-2892]; XP_011515432.1 [2876-2892]		0	1961.91	1.156	0.870667	135.6	83.5	50.4	11.79	4.51	1.62	7.38	5.58
	FALSE	High	[R].CVEDPETGLR.[L]	1.17725e-05	1.93435e-05	3	26	47	CAA91196.1; XP_005251037.1; XP_011515432.1	CAA91196.1 [3667-3676]; XP_005251037.1 [3535-3544]; XP_011515432.1 [3535-3544]		0	1176.52	0.953	0.97981	113.3	96	88.9	15.38	8.42	3.06	6.62	4.33
	FALSE	High	[R].DALDGPAAEAEPEHSFDGLR.[R]	7.4915e-14	1.93435e-05	3	25	21	CAA91196.1; XP_005251037.1; XP_011515432.1	CAA91196.1 [2768-2787]; XP_005251037.1 [2636-2655]; XP_011515432.1 [2636-2655]		0	2096.95	0.904	0.875768	118	99.1	101.9	7.22	2.27	2.68	6.01	5.2
	FALSE	High	[R].DDGTGQLLLPLSDAR.[K]	7.23955e-08	1.93435e-05	2	25	6	XP_005251037.1; XP_011515432.1	XP_005251037.1 [3872-3886]; XP_011515432.1 [3872-3886]		0	1570.81	0.01	6.09287e-17	191.8	123	17.1		4.57	6.8		129.83
	FALSE	High	[R].DGHNLISLLEVLSGDSLPR.[E]	2.25902e-12	1.93435e-05	4	26	10	CAA91196.1; XP_005251037.1; EAW82172.1; XP_011515432.1	CAA91196.1 [209-227]; XP_005251037.1 [77-95]; EAW82172.1 [99-117]; XP_011515432.1 [81-99]		0	2035.08	1.12	0.983301	115.8	91.8	62.2	25.84	21.78	9.78	7.26	32.31
	FALSE	High	[R].DLDKADSMIR.[L]	0.114131	0.00832698	4	26	5	CAA91196.1; XP_005251037.1; EAW82172.1; XP_011515432.1	CAA91196.1 [578-587]; XP_005251037.1 [446-455]; EAW82172.1 [468-477]; XP_011515432.1 [446-455]		1	1163.57	0.01	0.913506	67.6	94.2	338.2			14.67	67.91	6.41
	FALSE	High	[K].DLLPSDMAVALLEAQAGTGHIIDPATSAR.[L]	2.82718e-16	1.93435e-05	3	25	13	CAA91196.1; XP_005251037.1; XP_011515432.1	CAA91196.1 [3184-3212]; XP_005251037.1 [3052-3080]; XP_011515432.1 [3052-3080]		0	2933.5	0.293	0.919353	137.4	155.5	83.8	39.67	13.97	65	45.58	20
	FALSE	High	[K].DLLPSDMAVALLEAQAGTGHIIDPATSAR.[L]	6.16892e-16	1.93435e-05	3	25	15	CAA91196.1; XP_005251037.1; XP_011515432.1	CAA91196.1 [3184-3212]; XP_005251037.1 [3052-3080]; XP_011515432.1 [3052-3080]		0	2949.5	2.899	0.119129	159.1	40.5	53.9	18.46	29.49	35.7	64.74	47.75
	FALSE	High	[K].DLSELGSVR.[T]	0.00213603	0.000195525	3	25	13	CAA91196.1; XP_005251037.1; XP_011515432.1	CAA91196.1 [3477-3485]; XP_005251037.1 [3345-3353]; XP_011515432.1 [3345-3353]		0	975.511	0.873	0.799593	126.7	87.1	94.2	16.62	2.98	4.18	9.41	12.7
	FALSE	High	[R].DPYTGQSVSLFQALK.[K]	2.21215e-07	1.93435e-05	3	25	1	CAA91196.1; XP_005251037.1; XP_011515432.1	CAA91196.1 [3244-3258]; XP_005251037.1 [3112-3126]; XP_011515432.1 [3112-3126]		0	1653.85	100	6.09287e-17	200.7			33.97	11.9	4.32
	FALSE	High	[R].DSQDAGGFGPEDR.[L]	1.29123e-07	1.93435e-05	4	26	32	CAA91196.1; XP_005251037.1; EAW82172.1; XP_011515432.1	CAA91196.1 [1076-1088]; XP_005251037.1 [944-956]; EAW82172.1 [966-978]; XP_011515432.1 [944-956]		0	1350.56	0.996	0.966756	104.4	101.8	118.9	14.96	7.32	11.9	10.7	7.26
	FALSE	High	[K].DTHDQLSEPSEVR.[S]	1.87624e-09	1.93435e-05	3	26	63	CAA91196.1; XP_005251037.1; XP_011515432.1	CAA91196.1 [3969-3981]; XP_005251037.1 [3837-3849]; XP_011515432.1 [3837-3849]		0	1512.69	0.839	0.9434	123.6	103.3	94.6	11.16	4.71	3.41	15.58	1.28
	FALSE	High	[R].DVAEVDTVR.[R]	0.00124234	0.000154191	3	25	15	CAA91196.1; XP_005251037.1; XP_011515432.1	CAA91196.1 [3146-3154]; XP_005251037.1 [3014-3022]; XP_011515432.1 [3014-3022]		0	1003.51	0.867	0.993757	98.3	91.7	121	25.06	12.19	6.73	19.7	14.26
	FALSE	High	[R].EAEGQLQK.[L]	0.0126882	0.00111106	4	26	40	CAA91196.1; XP_005251037.1; EAW82172.1; XP_011515432.1	CAA91196.1 [870-877]; XP_005251037.1 [738-745]; EAW82172.1 [760-767]; XP_011515432.1 [738-745]		0	902.458	0.767	0.970725	92.5	100.1	96	4.06	13.39	8.2	15.09	13.51
	FALSE	High	[R].EAIAELER.[E]	0.00833516	0.000772347	4	25	24	CAA91196.1; XP_005251037.1; EAW82172.1; XP_011515432.1	CAA91196.1 [2587-2594]; XP_005251037.1 [2455-2462]; EAW82172.1 [2477-2484]; XP_011515432.1 [2455-2462]		0	930.489	1.039	0.89476	119.2	88.1	92.2	9.92	3.01	0.35	8.06	32.96
	FALSE	High	[R].EALEAESAWCYLYGTGSVAGVYLPGSR.[Q]	1.28002e-09	1.93435e-05	2	25	13	XP_005251037.1; XP_011515432.1	XP_005251037.1 [3680-3706]; XP_011515432.1 [3680-3706]		0	2907.35	0.582	0.976216	124.5	119.9	102.5	22.31	20.56	24.44	18.66	19.78
	FALSE	High	[K].EAQAVPATLPELEATK.[A]	5.25602e-07	1.93435e-05	4	26	14	CAA91196.1; XP_005251037.1; EAW82172.1; XP_011515432.1	CAA91196.1 [1251-1266]; XP_005251037.1 [1119-1134]; EAW82172.1 [1141-1156]; XP_011515432.1 [1119-1134]		0	1667.89	0.612	0.98585	128.4	119.4	92.5	3.72	2.69	4.43	0.4	3.63
	FALSE	High	[R].EEAAVDAQQQK.[R]	2.15219e-05	1.93435e-05	4	25	26	CAA91196.1; XP_005251037.1; EAW82172.1; XP_011515432.1	CAA91196.1 [1542-1552]; XP_005251037.1 [1410-1420]; EAW82172.1 [1432-1442]; XP_011515432.1 [1410-1420]		0	1216.58	1.207	0.928702	111.4	84.4	77.6	18.47	16.41	2.98	25.43	16.89
	FALSE	High	[K].EEEEVGFDWSDR.[N]	9.67592e-06	1.93435e-05	4	26	13	CAA91196.1; XP_005251037.1; EAW82172.1; XP_011515432.1	CAA91196.1 [773-784]; XP_005251037.1 [641-652]; EAW82172.1 [663-674]; XP_011515432.1 [641-652]		0	1497.61	1.43	0.838911	145.7	92.2	32	29.43	6.2	10.34	27.3	6.08
	FALSE	High	[R].EGLTSIEEVTK.[N]	5.13395e-06	1.93435e-05	3	26	11	CAA91196.1; XP_005251037.1; XP_011515432.1	CAA91196.1 [4050-4060]; XP_005251037.1 [3918-3928]; XP_011515432.1 [3918-3928]		0	1205.63	0.723	0.801681	90.3	131.8	103.9	30.72	17.38	28.38	8.31	32.58
	FALSE	High	[K].EGVVGPELHHK.[L]	0.000538914	4.2772e-05	3	25	11	CAA91196.1; XP_005251037.1; XP_011515432.1	CAA91196.1 [2893-2903]; XP_005251037.1 [2761-2771]; XP_011515432.1 [2761-2771]		0	1201.63	1.664	0.995725	77.1	98.9	121.4	19.33	27.59	23.55	39.57	39.23
	FALSE	High	[R].ELAEEAAR.[L]	0.0148027	0.00132206	4	26	39	CAA91196.1; XP_005251037.1; EAW82172.1; XP_011515432.1	CAA91196.1 [1935-1942]; XP_005251037.1 [1803-1810]; EAW82172.1 [1825-1832]; XP_011515432.1 [1803-1810]		0	888.442	1.103	0.995725	103.9	101.4	88.7	25.38	18.25	21.6	6.84	23.05
	FALSE	High	[R].ELAEQELEK.[Q]	0.000254946	4.2772e-05	4	25	32	CAA91196.1; XP_005251037.1; EAW82172.1; XP_011515432.1	CAA91196.1 [1825-1833]; XP_005251037.1 [1693-1701]; EAW82172.1 [1715-1723]; XP_011515432.1 [1693-1701]		0	1088.55	0.938	0.910378	124.1	98.2	91	3.37	1.39	1.77	2.36	1.37
	FALSE	High	[K].ELAQEQAR.[R]	0.012242	0.00109357	4	25	16	CAA91196.1; XP_005251037.1; EAW82172.1; XP_011515432.1	CAA91196.1 [2474-2481]; XP_005251037.1 [2342-2349]; EAW82172.1 [2364-2371]; XP_011515432.1 [2342-2349]		0	944.48	0.866	0.963542	101.2	109.2	99	23.09	21.73	9.61	8.69	12.14
	FALSE	High	[R].ELEQLGR.[Q]	0.0922342	0.00684346	4	26	22	CAA91196.1; XP_005251037.1; EAW82172.1; XP_011515432.1	CAA91196.1 [1338-1344]; XP_005251037.1 [1206-1212]; EAW82172.1 [1228-1234]; XP_011515432.1 [1206-1212]		0	844.452	1.182	0.611167	145.3	72.7	83.7	17.82	11.16	5.45	12.03	6.43
	FALSE	High	[K].ELIPTEEALR.[L]	0.000230833	4.2772e-05	3	26	17	CAA91196.1; XP_005251037.1; XP_011515432.1	CAA91196.1 [3926-3935]; XP_005251037.1 [3794-3803]; XP_011515432.1 [3794-3803]		0	1170.64	0.805	0.93817	121.8	104.3	96.9	2.33	7.51	5.64	9.55	0.84
	FALSE	High	[K].ELMWLNEK.[E]	0.0996148	0.00732402	4	26	6	CAA91196.1; XP_005251037.1; EAW82172.1; XP_011515432.1	CAA91196.1 [765-772]; XP_005251037.1 [633-640]; EAW82172.1 [655-662]; XP_011515432.1 [633-640]		0	1062.53	2.564	0.0752527	179	52		24.83	5.09	8.11	38.59
	FALSE	High	[K].ELQNAGDR.[L]	0.0262888	0.00211867	4	26	61	CAA91196.1; XP_005251037.1; EAW82172.1; XP_011515432.1	CAA91196.1 [811-818]; XP_005251037.1 [679-686]; EAW82172.1 [701-708]; XP_011515432.1 [679-686]		0	902.433	0.758	0.973563	107.8	110.1	105.4	24.3	28.54	23.47	8.13	23.35
	FALSE	High	[R].ELYQQLQR.[G]	0.00765779	0.000738505	3	25	36	CAA91196.1; XP_005251037.1; XP_011515432.1	CAA91196.1 [3132-3139]; XP_005251037.1 [3000-3007]; XP_011515432.1 [3000-3007]		0	1077.57	0.789	0.996401	111.9	102.7	105.8	5.86	10.43	1.86	6.73	5.84
	FALSE	High	[K].EMELPAK.[E]	0.0839587	0.00634965	4	26	26	CAA91196.1; XP_005251037.1; EAW82172.1; XP_011515432.1	CAA91196.1 [463-469]; XP_005251037.1 [331-337]; EAW82172.1 [353-359]; XP_011515432.1 [331-337]		0	817.412	0.816	0.9512	109	115.7	87.8	2.01	0.84	7.93	3.45	13.59
	FALSE	Medium	[K].EMELPAK.[E]	0.366053	0.0275393	4	26	1	CAA91196.1; XP_005251037.1; EAW82172.1; XP_011515432.1	CAA91196.1 [463-469]; XP_005251037.1 [331-337]; EAW82172.1 [353-359]; XP_011515432.1 [331-337]		0	833.407
	FALSE	High	[K].EMSVYEAYR.[K]	0.00160162	0.000154191	3	26	17	CAA91196.1; XP_005251037.1; XP_011515432.1	CAA91196.1 [4288-4296]; XP_005251037.1 [4156-4164]; XP_011515432.1 [4156-4164]		0	1147.51	0.821	0.889097	155.4	95.6	72.2	8.15	7.98	10.16	10.11	13.46
	FALSE	High	[K].EQAELEAAR.[Q]	0.00457761	0.000502794	4	26	26	CAA91196.1; XP_005251037.1; EAW82172.1; XP_011515432.1	CAA91196.1 [2100-2108]; XP_005251037.1 [1968-1976]; EAW82172.1 [1990-1998]; XP_011515432.1 [1968-1976]		0	1016.5	1.026	0.981218	136.3	87.8	71	8.98	10.03	15.58	30.78	7.92
	FALSE	High	[K].EQELQQTLQQEQSVLDQLR.[G]	2.59599e-13	1.93435e-05	3	25	12	XP_005251037.1; EAW82172.1; XP_011515432.1	XP_005251037.1 [2067-2085]; EAW82172.1 [2089-2107]; XP_011515432.1 [2067-2085]		0	2313.17	0.917	0.971929	118.8	103	99.4	9.28	4.01	2.48	9.03	2.27
	FALSE	High	[K].EQLNEYK.[G]	0.136075	0.00975809	4	26	13	CAA91196.1; XP_005251037.1; EAW82172.1; XP_011515432.1	CAA91196.1 [909-915]; XP_005251037.1 [777-783]; EAW82172.1 [799-805]; XP_011515432.1 [777-783]		0	923.447	1.209	0.782044	136.2	84.2	46.9	28.3	6.67	14.45	50.96	16.6
	FALSE	High	[R].EQLQLLEEQHR.[A]	6.83869e-06	1.93435e-05	3	25	24	CAA91196.1; XP_005251037.1; XP_011515432.1	CAA91196.1 [2733-2743]; XP_005251037.1 [2601-2611]; XP_011515432.1 [2601-2611]		0	1422.73	0.919	0.908814	125.2	96.9	77.8	1.46	5.57	12.14	2.6	4.02
	FALSE	High	[K].EQMAQQLAEETQGFQR.[T]	6.28504e-11	1.93435e-05	4	25	14	CAA91196.1; XP_005251037.1; EAW82172.1; XP_011515432.1	CAA91196.1 [2488-2503]; XP_005251037.1 [2356-2371]; EAW82172.1 [2378-2393]; XP_011515432.1 [2356-2371]		0	1893.88	0.881	0.254889	65.2	132.1	126.9	7.25	7.09	6.74	20.97	7.5
	FALSE	High	[R].ESADPLGAWLQDAR.[R]	7.75359e-09	1.93435e-05	4	26	10	CAA91196.1; XP_005251037.1; EAW82172.1; XP_011515432.1	CAA91196.1 [1351-1364]; XP_005251037.1 [1219-1232]; EAW82172.1 [1241-1254]; XP_011515432.1 [1219-1232]		0	1528.74	0.818	0.978758	119.4	105.4	99.5	7.22	2.28	1.4	8.03	0.69
	FALSE	High	[K].ESYSALMR.[E]	0.00796892	0.000755527	4	26	18	CAA91196.1; XP_005251037.1; EAW82172.1; XP_011515432.1	CAA91196.1 [793-800]; XP_005251037.1 [661-668]; EAW82172.1 [683-690]; XP_011515432.1 [661-668]		0	956.451	0.504	0.899778	108.1	117	128.3	11.87	2.43	7.35	27.7	4.56
	FALSE	High	[R].EYGSCSHHYQQLLQSLEQGAQEESR.[C]	3.69389e-10	1.93435e-05	4	26	13	CAA91196.1; XP_005251037.1; EAW82172.1; XP_011515432.1	CAA91196.1 [1094-1118]; XP_005251037.1 [962-986]; EAW82172.1 [984-1008]; XP_011515432.1 [962-986]		0	2965.3	0.35	0.988639	147.7	134.6	70.5	37.08	8.68	5.2	31.08	6.92
	FALSE	High	[K].FAEQTLR.[Q]	0.0306453	0.00249232	4	26	34	CAA91196.1; XP_005251037.1; EAW82172.1; XP_011515432.1	CAA91196.1 [2310-2316]; XP_005251037.1 [2178-2184]; EAW82172.1 [2200-2206]; XP_011515432.1 [2178-2184]		0	864.457	0.963	0.913051	120.1	97.4	105	2.89	5.76	6.05	18.28	3.33
	FALSE	Medium	[K].FKEMELPAK.[E]	0.201623	0.014016	4	26	1	CAA91196.1; XP_005251037.1; EAW82172.1; XP_011515432.1	CAA91196.1 [461-469]; XP_005251037.1 [329-337]; EAW82172.1 [351-359]; XP_011515432.1 [329-337]		1	1092.58	0.585	0.350682	52.8	47.1	329	30.3	14.24	18.55	69.68	16.08
	FALSE	High	[K].FLEGTSCIAGVFVDATK.[E]	2.09586e-09	1.93435e-05	3	26	16	CAA91196.1; XP_005251037.1; XP_011515432.1	CAA91196.1 [4065-4081]; XP_005251037.1 [3933-3949]; XP_011515432.1 [3933-3949]		0	1815.88	0.743	0.994019	122.4	111.2	98.3	3.08	10.12	8.31	7.22	9.12
	FALSE	Medium	[R].FIEQEK.[A]	0.226992	0.0157477	3	25	11	CAA91196.1; XP_005251037.1; XP_011515432.1	CAA91196.1 [2645-2650]; XP_005251037.1 [2513-2518]; XP_011515432.1 [2513-2518]		0	793.409	1.052	0.989732	95.7	112	104.4	4.72	32.71	30.25	17.1	23.72
	FALSE	High	[R].FLEVQYLTGGLIEPDTPGR.[V]	8.96258e-15	1.93435e-05	3	26	7	CAA91196.1; XP_005251037.1; XP_011515432.1	CAA91196.1 [4524-4542]; XP_005251037.1 [4392-4410]; XP_011515432.1 [4392-4410]		0	2105.09	0.779	0.987895	129.1	110.4	82.1	8.07	3.13	4.45	6.23	4.83
	FALSE	High	[R].FLEVQYLTGGLIEPDTPGRVPLDEALQR.[G]	8.93407e-14	1.93435e-05	3	26	14	CAA91196.1; XP_005251037.1; XP_011515432.1	CAA91196.1 [4524-4551]; XP_005251037.1 [4392-4419]; XP_011515432.1 [4392-4419]		1	3126.65	0.825	0.996401	96.4	92.3	156.3	19.65	6.77	6.69	22.16	6.22
	FALSE	High	[R].FLQEEAEK.[M]	0.00260812	0.000239462	4	26	28	CAA91196.1; XP_005251037.1; EAW82172.1; XP_011515432.1	CAA91196.1 [2402-2409]; XP_005251037.1 [2270-2277]; EAW82172.1 [2292-2299]; XP_011515432.1 [2270-2277]		0	993.489	0.714	0.785087	137.7	83.8	101.4	31.31	5.67	7.27	19.42	12.44
	FALSE	High	[K].FISETLR.[R]	0.0371154	0.00310565	4	26	34	CAA91196.1; XP_005251037.1; EAW82172.1; XP_011515432.1	CAA91196.1 [1473-1479]; XP_005251037.1 [1341-1347]; EAW82172.1 [1363-1369]; XP_011515432.1 [1341-1347]		0	865.478	1.037	0.857449	135.5	87.9	93.4	10.49	10.76	5.55	13.69	4.02
	FALSE	High	[R].FPSSFEEIEILWSQFLK.[F]	6.84284e-14	1.93435e-05	4	26	5	CAA91196.1; XP_005251037.1; EAW82172.1; XP_011515432.1	CAA91196.1 [444-460]; XP_005251037.1 [312-328]; EAW82172.1 [334-350]; XP_011515432.1 [312-328]		0	2100.07	0.038	6.09287e-17	9.6	277.5	170.8	54.2	118.98		12.83	22.44
	FALSE	High	[R].FPVTDAVNK.[G]	6.11595e-05	1.93435e-05	2	25	44	XP_005251037.1; XP_011515432.1	XP_005251037.1 [4335-4343]; XP_011515432.1 [4335-4343]		0	990.525	0.915	0.927259	97.2	112.6	102.3	17.94	5.84	4.96	9.52	6.11
	FALSE	Medium	[R].FRELAEEAAR.[L]	0.423326	0.0338186	4	26	1	CAA91196.1; XP_005251037.1; EAW82172.1; XP_011515432.1	CAA91196.1 [1933-1942]; XP_005251037.1 [1801-1810]; EAW82172.1 [1823-1832]; XP_011515432.1 [1801-1810]		1	1191.61					500					12.56
	FALSE	High	[R].GANVIAGVWLEEAGQK.[L]	9.62642e-09	1.93435e-05	3	25	19	CAA91196.1; XP_005251037.1; XP_011515432.1	CAA91196.1 [3159-3174]; XP_005251037.1 [3027-3042]; XP_011515432.1 [3027-3042]		0	1641.86	0.902	0.996527	111.9	101.7	102.6	8.76	2.54	1.52	10.18	0.11
	FALSE	High	[R].GAQEVGER.[L]	0.0413161	0.00338982	4	26	10	CAA91196.1; XP_005251037.1; EAW82172.1; XP_011515432.1	CAA91196.1 [1292-1299]; XP_005251037.1 [1160-1167]; EAW82172.1 [1182-1189]; XP_011515432.1 [1160-1167]		0	845.411	17.23	2.26504e-06	68.1	31.3	102	28.61	8.77	10.84	116.33	78.41
	FALSE	High	[R].GCLDEETSR.[A]	0.00212564	0.000195525	3	25	32	CAA91196.1; XP_005251037.1; XP_011515432.1	CAA91196.1 [3298-3306]; XP_005251037.1 [3166-3174]; XP_011515432.1 [3166-3174]		0	1067.43	1.202	0.491438	146.5	80.1	84.9	8.7	17.31	18.59	10.86	5.34
	FALSE	High	[K].GDECQLVGPAQPSHWK.[V]	1.40583e-10	1.93435e-05	4	26	12	CAA91196.1; XP_005251037.1; EAW82172.1; XP_011515432.1	CAA91196.1 [962-977]; XP_005251037.1 [830-845]; EAW82172.1 [852-867]; XP_011515432.1 [830-845]		0	1809.82	1.133	0.961454	123.4	96.3	58.7	3.3	6.35	8.03	16.09	3.91
	FALSE	High	[K].GFFDPNTEENLTYLQLMER.[C]	2.87612e-12	1.93435e-05	3	26	10	CAA91196.1; XP_005251037.1; XP_011515432.1	CAA91196.1 [4226-4244]; XP_005251037.1 [4094-4112]; XP_011515432.1 [4094-4112]		0	2317.08	0.331	0.98524	159.4	113.4	82.7	46.59	52.5	31.49	24.15	34.89
	FALSE	High	[K].GFFDPNTEENLTYLQLMER.[C]	3.08603e-12	1.93435e-05	3	26	7	CAA91196.1; XP_005251037.1; XP_011515432.1	CAA91196.1 [4226-4244]; XP_005251037.1 [4094-4112]; XP_011515432.1 [4094-4112]		0	2333.08	100	6.09287e-17	137.2	62.3	62.1	15.06	54.18	37.48		56.25
	FALSE	High	[K].GFFDPNTHENLTYLQLLER.[C]	2.98473e-11	1.93435e-05	4	33	5	CAA91196.1; XP_005251037.1; XP_016869381.1; XP_011515432.1	CAA91196.1 [2989-3007]; XP_005251037.1 [2857-2875]; XP_016869381.1 [799-817]; [1760-1778]; XP_011515432.1 [2857-2875]		0	2307.14	0.828	0.906798	132.5	94.6	90	15.04	5.35	7.79	12.68	3
	FALSE	High	[K].GFFDPNTHENLTYR.[Q]	1.47838e-10	1.93435e-05	3	25	27	CAA91196.1; XP_005251037.1; XP_011515432.1	CAA91196.1 [3648-3661]; XP_005251037.1 [3516-3529]; XP_011515432.1 [3516-3529]		0	1710.79	1	0.869908	113	92.9	99.9	3.45	2.11	4.5	14.54	6.81
	FALSE	High	[R].GGAEGELQALR.[A]	0.000197864	4.2772e-05	4	25	13	CAA91196.1; XP_005251037.1; EAW82172.1; XP_011515432.1	CAA91196.1 [1606-1616]; XP_005251037.1 [1474-1484]; EAW82172.1 [1496-1506]; XP_011515432.1 [1474-1484]		0	1100.57	0.667	0.739859	91.2	122.8	125.7	22.95	0.55	24.31	4.23	2.06
	FALSE	High	[K].GGELVYTDSEAR.[D]	6.24671e-06	1.93435e-05	3	24	28	CAA91196.1; XP_005251037.1; XP_011515432.1	CAA91196.1 [3028-3039]; XP_005251037.1 [2896-2907]; XP_011515432.1 [2896-2907]		0	1296.61	0.971	0.963595	117.5	97.2	92	3.85	3.62	7.96	17.55	20.37
	FALSE	High	[K].GHLSGLAK.[R]	0.0101937	0.000875016	4	26	24	CAA91196.1; XP_005251037.1; EAW82172.1; XP_011515432.1	CAA91196.1 [916-923]; XP_005251037.1 [784-791]; EAW82172.1 [806-813]; XP_011515432.1 [784-791]		0	782.452	0.613	0.88519	129	98.5	97.7	21.64	17.3	17.6	53.62	9.9
	FALSE	High	[R].GLFDEEMNEILTDPSDDTK.[G]	7.4302e-13	1.93435e-05	3	26	15	CAA91196.1; XP_005251037.1; XP_011515432.1	CAA91196.1 [4207-4225]; XP_005251037.1 [4075-4093]; XP_011515432.1 [4075-4093]		0	2168.95	0.76	0.988108	111	106.3	101.4	10.26	6.44	2.23	5.69	3.31
	FALSE	High	[R].GLFDEEMNEILTDPSDDTK.[G]	3.69202e-13	1.93435e-05	3	26	5	CAA91196.1; XP_005251037.1; XP_011515432.1	CAA91196.1 [4207-4225]; XP_005251037.1 [4075-4093]; XP_011515432.1 [4075-4093]		0	2184.95	100	6.09287e-17	93.2	77.4	95.8	45.82	62.32	48.51
	FALSE	High	[R].GLHQSIEEFR.[A]	0.000206921	4.2772e-05	3	25	28	XP_005251037.1; EAW82172.1; XP_011515432.1	XP_005251037.1 [565-574]; EAW82172.1 [587-596]; XP_011515432.1 [565-574]		0	1215.61	0.775	0.950949	116.1	110.7	103.3	16.08	7.52	16.11	9.92	11.49
	FALSE	High	[K].GIIRPGTAFELLEAQAATGYVIDPIK.[G]	4.17918e-14	1.93435e-05	3	26	6	CAA91196.1; XP_005251037.1; XP_011515432.1	CAA91196.1 [4093-4118]; XP_005251037.1 [3961-3986]; XP_011515432.1 [3961-3986]		0	2743.5	0.526	0.986139	119.4	104.4	132.2	21.58	3.55	10.12	7.57	5.62
	FALSE	High	[K].GLLSAEVAR.[L]	0.00326076	0.000367025	3	26	22	CAA91196.1; XP_005251037.1; XP_011515432.1	CAA91196.1 [3850-3858]; XP_005251037.1 [3718-3726]; XP_011515432.1 [3718-3726]		0	915.526	0.614	0.747015	86.8	120.2	153	9.32	6.87	17.35	10.13	18.65
	FALSE	High	[K].GLVEDTLR.[Q]	0.0304833	0.00249232	4	26	30	CAA91196.1; XP_005251037.1; EAW82172.1; XP_011515432.1	CAA91196.1 [2048-2055]; XP_005251037.1 [1916-1923]; EAW82172.1 [1938-1945]; XP_011515432.1 [1916-1923]		0	902.494	0.784	0.988852	114	108.1	106.3	5.8	9.77	15	11.14	1.43
	FALSE	High	[K].GLVGPELHDR.[L]	2.2975e-05	1.93435e-05	3	26	26	CAA91196.1; XP_005251037.1; XP_011515432.1	CAA91196.1 [3888-3897]; XP_005251037.1 [3756-3765]; XP_011515432.1 [3756-3765]		0	1092.58	0.931	0.987247	111.3	94.3	97.8	7.9	8.12	8.16	13.1	4.28
	FALSE	High	[K].GIYQSLEGAVQAGQLK.[V]	2.79201e-09	1.93435e-05	4	26	18	CAA91196.1; XP_005251037.1; EAW82172.1; XP_011515432.1	CAA91196.1 [478-493]; XP_005251037.1 [346-361]; EAW82172.1 [368-383]; XP_011515432.1 [346-361]		0	1661.89	0.869	0.970092	118.4	98.7	99.1	4.14	4.86	1.5	1.44	1.94
	FALSE	High	[K].GRLCFEGLR.[S]	0.0234119	0.00181324	3	25	2	CAA91196.1; XP_005251037.1; XP_011515432.1	CAA91196.1 [3107-3115]; XP_005251037.1 [2975-2983]; XP_011515432.1 [2975-2983]		1	1108.56	7.238	0.329724	130.2	44.2	62.9	75.69	6.14	0.41	10.31	27.5
	FALSE	High	[R].GRLPLLAVCDYK.[Q]	1.23797e-05	1.93435e-05	4	26	8	CAA91196.1; XP_005251037.1; EAW82172.1; XP_011515432.1	CAA91196.1 [942-953]; XP_005251037.1 [810-821]; EAW82172.1 [832-843]; XP_011515432.1 [810-821]		1	1405.75	0.589	0.977874	111.8	108.4	133.9	11.05	12.86	7.9	20.03	2.31
	FALSE	High	[R].GTQGAEEVLR.[A]	0.000211077	4.2772e-05	4	26	20	CAA91196.1; XP_005251037.1; EAW82172.1; XP_011515432.1	CAA91196.1 [1234-1243]; XP_005251037.1 [1102-1111]; EAW82172.1 [1124-1133]; XP_011515432.1 [1102-1111]		0	1059.54	0.994	0.953583	91.7	108.5	86.5	18.3	4.51	8.03	17.57	5.02
	FALSE	High	[K].GWLYYEAGQR.[F]	0.00123628	0.000154191	3	26	9	CAA91196.1; XP_005251037.1; XP_011515432.1	CAA91196.1 [4514-4523]; XP_005251037.1 [4382-4391]; XP_011515432.1 [4382-4391]		0	1242.59	4.401	3.88448e-05	183.4	14.5	129.4	39.57	8.72	9.17	87.73	17.45
	FALSE	High	[CR].GYFDEEMNR.[IV]	0.00354074	0.000427246	4	34	11	CAA91196.1; XP_005251037.1; XP_016869381.1; XP_011515432.1	CAA91196.1 [2970-2978]; XP_005251037.1 [2838-2846]; XP_016869381.1 [1741-1749]; [2399-2407]; [2935-2943]; [3466-3474]; [4000-4008]; XP_011515432.1 [2838-2846]		0	1160.47	0.901	0.882338	131.2	93	85.3	12.04	4.26	3.69	5.12	3.53
	FALSE	Medium	[CR].GYFDEEMNR.[IV]	0.146394	0.010381	4	34	2	CAA91196.1; XP_005251037.1; XP_016869381.1; XP_011515432.1	CAA91196.1 [2970-2978]; XP_005251037.1 [2838-2846]; XP_016869381.1 [1741-1749]; [2399-2407]; [2935-2943]; [3466-3474]; [4000-4008]; XP_011515432.1 [2838-2846]		0	1176.46	100	6.09287e-17	178.5		99	70.9	16.7	30.48
	FALSE	High	[R].GYFSEEMNR.[V]	0.00198535	0.000195525	3	25	31	CAA91196.1; XP_005251037.1; XP_011515432.1	CAA91196.1 [3629-3637]; XP_005251037.1 [3497-3505]; XP_011515432.1 [3497-3505]		0	1132.47	1.093	0.83507	125.6	81.9	101.2	0.61	17.8	20.77	14.09	8.2
	FALSE	High	[R].GYFSEEMNR.[V]	0.0224477	0.00170588	3	25	3	CAA91196.1; XP_005251037.1; XP_011515432.1	CAA91196.1 [3629-3637]; XP_005251037.1 [3497-3505]; XP_011515432.1 [3497-3505]		0	1148.47	0.463	0.261146	133.6	66	74	48.1	10.99	34.04	67.08	7.77
	FALSE	High	[K].GYYSPYSVSGSGSTAGSR.[T]	5.61892e-09	1.93435e-05	3	26	3	CAA91196.1; XP_005251037.1; XP_011515432.1	CAA91196.1 [4610-4627]; XP_005251037.1 [4478-4495]; XP_011515432.1 [4478-4495]		0	1782.79					500					20.07
	FALSE	High	[R].HHTAAFEER.[R]	0.053322	0.00421755	4	26	11	CAA91196.1; XP_005251037.1; EAW82172.1; XP_011515432.1	CAA91196.1 [434-442]; XP_005251037.1 [302-310]; EAW82172.1 [324-332]; XP_011515432.1 [302-310]		0	1097.51	0.479	0.0760166	79.5	169.3	96.3	12.98	15.77	20.53	7.13	5.22
	FALSE	High	[R].HKPLLIDMNK.[V]	0.000631175	6.84312e-05	4	26	19	CAA91196.1; XP_005251037.1; EAW82172.1; XP_011515432.1	CAA91196.1 [337-346]; XP_005251037.1 [205-214]; EAW82172.1 [227-236]; XP_011515432.1 [209-218]		0	1208.68	0.318	0.937846	104	102.5	162.9	24.89	31.44	16.33	27.46	22.6
	FALSE	High	[R].HISDLYEDLR.[D]	6.31994e-08	1.93435e-05	4	26	13	CAA91196.1; XP_005251037.1; EAW82172.1; XP_011515432.1	CAA91196.1 [199-208]; XP_005251037.1 [67-76]; EAW82172.1 [89-98]; XP_011515432.1 [71-80]		0	1260.62	0.767	0.991058	108	110.8	115.5	8.43	12.48	9.01	9.63	7.92
	FALSE	High	[R].HPQGEQMYR.[R]	2.44032e-05	1.93435e-05	4	26	30	CAA91196.1; XP_005251037.1; EAW82172.1; XP_011515432.1	CAA91196.1 [601-609]; XP_005251037.1 [469-477]; EAW82172.1 [491-499]; XP_011515432.1 [469-477]		0	1145.52	1.115	0.990354	104.3	91.7	102.2	12.27	17.71	28.59	6.46	6.36
	FALSE	High	[R].HPQGEQMYR.[R]	0.108703	0.00806051	4	26	4	CAA91196.1; XP_005251037.1; EAW82172.1; XP_011515432.1	CAA91196.1 [601-609]; XP_005251037.1 [469-477]; EAW82172.1 [491-499]; XP_011515432.1 [469-477]		0	1161.51	1.873	0.467274	197.9	87.5	61.1	70.39	43.79	11.2	76.48	4.65
	FALSE	Medium	[R].HYLQGR.[S]	0.338375	0.0248041	3	25	11	CAA91196.1; XP_005251037.1; XP_011515432.1	CAA91196.1 [2827-2832]; XP_005251037.1 [2695-2700]; XP_011515432.1 [2695-2700]		0	773.405	0.655	0.957907	117.4	124.6	80.1	12.76	14.75	12.97	10.61	6.65
	FALSE	Medium	[R].KAALEEVER.[L]	0.500199	0.042583	4	26	1	CAA91196.1; XP_005251037.1; EAW82172.1; XP_011515432.1	CAA91196.1 [2142-2150]; XP_005251037.1 [2010-2018]; EAW82172.1 [2032-2040]; XP_011515432.1 [2010-2018]		1	1044.57
	FALSE	High	[R].KASDSELER.[Q]	0.00186333	0.000154191	4	26	16	CAA91196.1; XP_005251037.1; EAW82172.1; XP_011515432.1	CAA91196.1 [2037-2045]; XP_005251037.1 [1905-1913]; EAW82172.1 [1927-1935]; XP_011515432.1 [1905-1913]		1	1034.51	0.872	0.719764	74	117.6	134	19.15	5.66	8.77	14.9	14.19
	FALSE	High	[K].KELIPTEEALR.[L]	0.0292189	0.00234049	3	26	6	CAA91196.1; XP_005251037.1; XP_011515432.1	CAA91196.1 [3925-3935]; XP_005251037.1 [3793-3803]; XP_011515432.1 [3793-3803]		1	1298.73	1.44	0.9933	104.2	90.1	53	5.01	9.48	5.02	30.97	5.89
	FALSE	High	[K].KESYSALMR.[E]	0.0138444	0.0012172	4	26	4	CAA91196.1; XP_005251037.1; EAW82172.1; XP_011515432.1	CAA91196.1 [792-800]; XP_005251037.1 [660-668]; EAW82172.1 [682-690]; XP_011515432.1 [660-668]		1	1084.55	0.01	6.09287e-17		174.5	325.5				70.48	39.98
	FALSE	High	[R].KGLVGPELHDR.[L]	1.72879e-07	1.93435e-05	3	26	9	CAA91196.1; XP_005251037.1; XP_011515432.1	CAA91196.1 [3887-3897]; XP_005251037.1 [3755-3765]; XP_011515432.1 [3755-3765]		1	1220.67	0.597	0.351972	79.9	111.3	124.1	28.34	19.15	39.18	42.01	47.34
	FALSE	High	[R].KQAEEIGEK.[L]	0.000206921	4.2772e-05	4	25	17	CAA91196.1; XP_005251037.1; EAW82172.1; XP_011515432.1	CAA91196.1 [2545-2553]; XP_005251037.1 [2413-2421]; EAW82172.1 [2435-2443]; XP_011515432.1 [2413-2421]		1	1031.54	0.539	0.979924	107.7	111.8	133.8	34.67	34.07	17.73	30.4	9.76
	FALSE	High	[R].KQEELQQLEQQR.[R]	7.68625e-11	1.93435e-05	3	25	40	CAA91196.1; XP_005251037.1; XP_011515432.1	CAA91196.1 [2706-2717]; XP_005251037.1 [2574-2585]; XP_011515432.1 [2574-2585]		1	1556.8	0.706	0.638927	91.9	129.8	96.1	3.86	11.27	10.98	8.48	5.82
	FALSE	High	[R].KQITMEELVR.[S]	0.00223182	0.000195525	3	26	2	CAA91196.1; XP_005251037.1; XP_011515432.1	CAA91196.1 [4027-4036]; XP_005251037.1 [3895-3904]; XP_011515432.1 [3895-3904]		1	1246.68	0.127	0.0621309	92.3	238.2	45.5	92.27		32.45	67.43	11.29
	FALSE	High	[R].LAAEQELIR.[L]	0.000326768	4.2772e-05	4	25	19	CAA91196.1; XP_005251037.1; EAW82172.1; XP_011515432.1	CAA91196.1 [1846-1854]; XP_005251037.1 [1714-1722]; EAW82172.1 [1736-1744]; XP_011515432.1 [1714-1722]		0	1042.59	1.055	0.783716	120.8	88.2	98.7	11.39	1.79	12.77	3.05	8.25
	FALSE	High	[K].LAAIGEATR.[L]	0.00229804	0.000195525	4	26	23	CAA91196.1; XP_005251037.1; EAW82172.1; XP_011515432.1	CAA91196.1 [1976-1984]; XP_005251037.1 [1844-1852]; EAW82172.1 [1866-1874]; XP_011515432.1 [1844-1852]		0	901.51	0.948	0.810223	112.8	96.1	101.3	7.24	5.39	5.21	15.97	29.65
	FALSE	High	[R].LAEDEAFQR.[R]	0.0002666	4.2772e-05	4	26	24	CAA91196.1; XP_005251037.1; EAW82172.1; XP_011515432.1	CAA91196.1 [2006-2014]; XP_005251037.1 [1874-1882]; EAW82172.1 [1896-1904]; XP_011515432.1 [1874-1882]		0	1078.52	1.059	0.960983	107.2	110.9	94.5	20.01	29.35	5.1	20.5	1.01
	FALSE	High	[R].LAEVEAALEK.[Q]	2.16304e-05	1.93435e-05	4	25	15	CAA91196.1; XP_005251037.1; EAW82172.1; XP_011515432.1	CAA91196.1 [1499-1508]; XP_005251037.1 [1367-1376]; EAW82172.1 [1389-1398]; XP_011515432.1 [1367-1376]		0	1072.59	0.928	0.988639	107.9	97.5	91.7	13.17	13.1	5.95	5.17	9.01
	FALSE	High	[R].LAQGHTTVDELAR.[R]	9.95312e-10	1.93435e-05	3	25	30	CAA91196.1; XP_005251037.1; XP_011515432.1	CAA91196.1 [2809-2821]; XP_005251037.1 [2677-2689]; XP_011515432.1 [2677-2689]		0	1410.73	0.794	0.680593	141.9	85.7	89.6	25.63	1.48	2.18	5.38	11.31
	FALSE	High	[R].LCFEGLR.[S]	0.0834946	0.00628824	3	25	17	CAA91196.1; XP_005251037.1; XP_011515432.1	CAA91196.1 [3109-3115]; XP_005251037.1 [2977-2983]; XP_011515432.1 [2977-2983]		0	895.434	100	6.09287e-17	160	2	109.9	106.34	10.35	9.64		85.26
	FALSE	High	[R].LDLQYAK.[L]	0.0308082	0.00249232	4	26	23	CAA91196.1; XP_005251037.1; EAW82172.1; XP_011515432.1	CAA91196.1 [734-740]; XP_005251037.1 [602-608]; EAW82172.1 [624-630]; XP_011515432.1 [602-608]		0	850.467	0.824	0.974464	106.5	105.7	113.5	15.31	11.52	2.44	6.97	8.5
	FALSE	High	[R].LEAEAGR.[F]	0.0897236	0.00663537	4	26	24	CAA91196.1; XP_005251037.1; EAW82172.1; XP_011515432.1	CAA91196.1 [1926-1932]; XP_005251037.1 [1794-1800]; EAW82172.1 [1816-1822]; XP_011515432.1 [1794-1800]		0	745.384	0.825	0.976216	112.6	114.5	71.3	10.58	14.71	4.46	23.35	18.82
	FALSE	Medium	[R].LECLQR.[I]	0.195865	0.0136042	4	26	29	CAA91196.1; XP_005251037.1; EAW82172.1; XP_011515432.1	CAA91196.1 [528-533]; XP_005251037.1 [396-401]; EAW82172.1 [418-423]; XP_011515432.1 [396-401]		0	819.403	0.892	0.906235	128.5	96.9	104	6.07	6.1	8.17	6.71	5.4
	FALSE	High	[R].LEDLLQDAQDEK.[E]	2.27995e-07	1.93435e-05	4	26	16	CAA91196.1; XP_005251037.1; EAW82172.1; XP_011515432.1	CAA91196.1 [897-908]; XP_005251037.1 [765-776]; EAW82172.1 [787-798]; XP_011515432.1 [765-776]		0	1416.69	1.066	0.950492	126.3	108	57.8	8.81	1.61	2.74	21.65	2.82
	FALSE	High	[R].LEDLLQDAQDEKEQLNEYK.[G]	1.2562e-11	1.93435e-05	4	26	5	CAA91196.1; XP_005251037.1; EAW82172.1; XP_011515432.1	CAA91196.1 [897-915]; XP_005251037.1 [765-783]; EAW82172.1 [787-805]; XP_011515432.1 [765-783]		1	2321.11	0.01	6.09287e-17		163.6	336.4				45.22	1.92
	FALSE	High	[K].LEQLFQDEVAK.[A]	9.43564e-06	1.93435e-05	3	25	15	CAA91196.1; XP_005251037.1; XP_011515432.1	CAA91196.1 [2653-2663]; XP_005251037.1 [2521-2531]; XP_011515432.1 [2521-2531]		0	1319.68	0.962	0.919606	130.7	101.8	75.3	8.94	3.28	0.61	15.8	5
	FALSE	High	[R].LFNAIIHR.[H]	1.6079e-05	1.93435e-05	4	26	32	CAA91196.1; XP_005251037.1; EAW82172.1; XP_011515432.1	CAA91196.1 [329-336]; XP_005251037.1 [197-204]; EAW82172.1 [219-226]; XP_011515432.1 [201-208]		0	983.579	0.428	0.0392013	64	172	106.1	10.79	9.2	23.28	12.61	14.8
	FALSE	High	[K].LHVAILER.[E]	0.0104023	0.000875016	4	26	11	CAA91196.1; XP_005251037.1; EAW82172.1; XP_011515432.1	CAA91196.1 [510-517]; XP_005251037.1 [378-385]; EAW82172.1 [400-407]; XP_011515432.1 [378-385]		0	950.578	0.693	0.844629	110	123.6	91.4	13.48	3.78	7.36	27.33	14.34
	FALSE	High	[R].LKAEAELLQQQK.[E]	1.0348e-07	1.93435e-05	4	25	24	CAA91196.1; XP_005251037.1; EAW82172.1; XP_011515432.1	CAA91196.1 [2462-2473]; XP_005251037.1 [2330-2341]; EAW82172.1 [2352-2363]; XP_011515432.1 [2330-2341]		1	1398.8	0.876	0.948279	106.3	90.1	137.6	2.9	6.45	24.39	30.47	3.88
	FALSE	High	[R].LKAEATEAAR.[Q]	0.00184523	0.000154191	4	26	7	CAA91196.1; XP_005251037.1; EAW82172.1; XP_011515432.1	CAA91196.1 [2349-2358]; XP_005251037.1 [2217-2226]; EAW82172.1 [2239-2248]; XP_011515432.1 [2217-2226]		1	1059.58	1.03	0.911379	95.6	92.2	128.4	6.09	85.12	19.76	12.98	6.15
	FALSE	High	[R].LKTEAEIALK.[E]	0.000894994	9.10162e-05	4	26	13	CAA91196.1; XP_005251037.1; EAW82172.1; XP_011515432.1	CAA91196.1 [1985-1994]; XP_005251037.1 [1853-1862]; EAW82172.1 [1875-1884]; XP_011515432.1 [1853-1862]		1	1115.67	0.761	0.944222	85.1	93.4	240	88.51	8.83	10.94	87.64	16.55
	FALSE	High	[R].LLDAQLATGGIVDPR.[L]	9.24663e-09	1.93435e-05	3	26	13	CAA91196.1; XP_005251037.1; XP_011515432.1	CAA91196.1 [3936-3950]; XP_005251037.1 [3804-3818]; XP_011515432.1 [3804-3818]		0	1538.85	0.852	0.957907	122.9	99.3	100.8	0.61	3.21	3	6.75	2.78
	FALSE	High	[R].LLDAQLSTGGIVDPSK.[S]	2.11315e-10	1.93435e-05	3	25	15	CAA91196.1; XP_005251037.1; XP_011515432.1	CAA91196.1 [3270-3285]; XP_005251037.1 [3138-3153]; XP_011515432.1 [3138-3153]		0	1613.87	0.78	0.981442	121.8	103.7	99.3	1.35	6.29	2.15	2.38	1.32
	FALSE	High	[R].LLDPEDVDVPQPDEK.[S]	2.88676e-10	1.93435e-05	4	26	18	CAA91196.1; XP_005251037.1; EAW82172.1; XP_011515432.1	CAA91196.1 [372-386]; XP_005251037.1 [240-254]; EAW82172.1 [262-276]; XP_011515432.1 [244-258]		0	1708.83	0.878	0.859034	128.1	100.4	82	10.45	3.5	4.62	3.51	3.36
	FALSE	High	[R].LLEAAAQSTK.[G]	9.8919e-05	1.93435e-05	3	26	30	CAA91196.1; XP_005251037.1; XP_011515432.1	CAA91196.1 [4600-4609]; XP_005251037.1 [4468-4477]; XP_011515432.1 [4468-4477]		0	1031.57	0.836	0.545246	155.3	82.7	99.8	24.03	12.03	4.18	21.3	9.83
	FALSE	High	[R].LLEAQACTGGIIDPSTGER.[FL]	2.42266e-15	1.93435e-05	3	26	15	CAA91196.1; XP_005251037.1; XP_011515432.1	CAA91196.1 [4448-4466]; XP_005251037.1 [4316-4334]; XP_011515432.1 [4316-4334]		0	1988.96	0.859	0.918121	143.8	98.9	68.3	4.09	11.27	7.9	4.26	9.45
	FALSE	High	[R].LLEAQACTGGIIDPSTGERFPVTDAVNK.[G]	5.57759e-13	1.93435e-05	2	25	6	XP_005251037.1; XP_011515432.1	XP_005251037.1 [4316-4343]; XP_011515432.1 [4316-4343]		1	2960.47	0.01	6.09287e-17		500					69.81
	FALSE	High	[R].LLEAQIATGGIIDPEESHR.[L]	2.72629e-11	1.93435e-05	3	26	10	CAA91196.1; XP_005251037.1; XP_011515432.1	CAA91196.1 [4179-4197]; XP_005251037.1 [4047-4065]; XP_011515432.1 [4047-4065]		0	2049.06	0.675	0.95648	139.3	114.3	75	13.85	14.98	3.49	12.9	3.42
	FALSE	High	[R].LLEAQIATGGIIDPVHSHR.[V]	7.19959e-11	1.93435e-05	3	31	6	XP_005251037.1; XP_016869381.1; XP_011515432.1	XP_005251037.1 [3469-3487]; XP_016869381.1 [1713-1731]; XP_011515432.1 [3469-3487]		0	2027.1	8.104	0.70703	44.9	35.9	61.1	10.81		26.72	92.81	113.01
	FALSE	High	[R].LLEAQIATGGVIDPVHSHR.[V]	1.13594e-11	1.93435e-05	4	34	13	CAA91196.1; XP_005251037.1; XP_016869381.1; XP_011515432.1	CAA91196.1 [2942-2960]; XP_005251037.1 [2810-2828]; XP_016869381.1 [752-770]; [2371-2389]; [2907-2925]; [3438-3456]; [3972-3990]; XP_011515432.1 [2810-2828]		0	2013.09	0.143	0.924339	139.5	128.2	142	8.35	7.1	10.49	17.94	8.23
	FALSE	High	[R].LLFNDVQTLK.[D]	0.000215317	4.2772e-05	4	26	9	CAA91196.1; XP_005251037.1; EAW82172.1; XP_011515432.1	CAA91196.1 [588-597]; XP_005251037.1 [456-465]; EAW82172.1 [478-487]; XP_011515432.1 [456-465]		0	1190.68	0.796	0.989836	105.5	113.2	106.8	1.21	2.85	1.99	2
	FALSE	High	[R].LLLEAQAATGFLLDPVK.[G]	2.06066e-10	1.93435e-05	3	26	12	CAA91196.1; XP_005251037.1; XP_011515432.1	CAA91196.1 [3859-3875]; XP_005251037.1 [3727-3743]; XP_011515432.1 [3727-3743]		0	1799.03	0.01	6.09287e-17	9.3	315	175.7			17.13
	FALSE	High	[R].LLLEAQAATGFLLDPVKGER.[L]	1.36655e-09	1.93435e-05	3	26	10	CAA91196.1; XP_005251037.1; XP_011515432.1	CAA91196.1 [3859-3878]; XP_005251037.1 [3727-3746]; XP_011515432.1 [3727-3746]		1	2141.2	0.01	0.93032	157.1	94.5	136.9		67.33	39.04	27.87	21.43
	FALSE	High	[K].ILITIVEEVETLR.[Q]	1.00403e-07	1.93435e-05	3	25	20	CAA91196.1; XP_005251037.1; XP_011515432.1	CAA91196.1 [3424-3436]; XP_005251037.1 [3292-3304]; XP_011515432.1 [3292-3304]		0	1527.9	0.653	1	131.3	107.5	79.4	19.43	7.21	10.71	11.77	7.22
	FALSE	High	[K].IIITVVEEQEQK.[G]	3.92573e-07	1.93435e-05	3	25	33	CAA91196.1; XP_005251037.1; XP_011515432.1	CAA91196.1 [3095-3106]; XP_005251037.1 [2963-2974]; XP_011515432.1 [2963-2974]		0	1428.79	0.633	0.999335	117.8	112.3	123	13.7	7.96	2.94	2.8	5.29
	FALSE	High	[K].LLLWSQR.[M]	0.0272783	0.00215105	4	26	9	CAA91196.1; XP_005251037.1; EAW82172.1; XP_011515432.1	CAA91196.1 [301-307]; XP_005251037.1 [169-175]; EAW82172.1 [191-197]; XP_011515432.1 [173-179]		0	915.541	0.658	0.785305	153.2	93.5	90.5	6.67	8.62	8.31	2.41	21.98
	FALSE	High	[R].IISLETYNLLR.[E]	7.81828e-05	1.93435e-05	3	26	3	CAA91196.1; XP_005251037.1; XP_011515432.1	CAA91196.1 [3794-3804]; XP_005251037.1 [3662-3672]; XP_011515432.1 [3662-3672]		0	1334.77	100				243.9	7.74				7.89
	FALSE	High	[K].LISLFQAMK.[K]	0.000422864	4.2772e-05	3	26	12	CAA91196.1; XP_005251037.1; XP_011515432.1	CAA91196.1 [4159-4167]; XP_005251037.1 [4027-4035]; XP_011515432.1 [4027-4035]		0	1050.6	0.513	0.395213	194.1	83.9	74.3	20.84	5.21	17.77	2.59	14.08
	FALSE	Medium	[R].INLAQK.[A]	0.523313	0.0458952	3	26	14	CAA91196.1; XP_005251037.1; XP_011515432.1	CAA91196.1 [4486-4491]; XP_005251037.1 [4354-4359]; XP_011515432.1 [4354-4359]		0	686.42	1.189	0.973563	104.7	99.1	93.4	20.92	6.87	10.46	21.94	14.23
	FALSE	High	[R].LPLDKEPAR.[E]	0.000181817	4.2772e-05	4	26	34	CAA91196.1; XP_005251037.1; EAW82172.1; XP_011515432.1	CAA91196.1 [1146-1154]; XP_005251037.1 [1014-1022]; EAW82172.1 [1036-1044]; XP_011515432.1 [1014-1022]		1	1038.59	1.066	0.949323	120.4	96.6	79.1	1.38	3.72	8.21	17.64	10.61
	FALSE	High	[R].LPLLAVCDYK.[Q]	0.00011265	1.93435e-05	4	26	1	CAA91196.1; XP_005251037.1; EAW82172.1; XP_011515432.1	CAA91196.1 [944-953]; XP_005251037.1 [812-821]; EAW82172.1 [834-843]; XP_011515432.1 [812-821]		0	1192.63
	FALSE	High	[R].LPVEVAYK.[R]	0.00257033	0.000217647	3	26	12	CAA91196.1; XP_005251037.1; XP_011515432.1	CAA91196.1 [4198-4205]; XP_005251037.1 [4066-4073]; XP_011515432.1 [4066-4073]		0	918.529	0.995	0.602447	143.7	84	61.8	11.2	4.32	8.36	18.8	13.31
	FALSE	High	[R].LQAEEAER.[RW]	0.00405508	0.000483359	4	25	35	CAA91196.1; XP_005251037.1; EAW82172.1; XP_011515432.1	CAA91196.1 [1680-1687]; XP_005251037.1 [1548-1555]; EAW82172.1 [1570-1577]; XP_011515432.1 [1548-1555]		0	945.464	1.452	0.499685	136.7	78.9	97.7	16.19	14.07	7.33	27.94	2.26
	FALSE	High	[R].LQAEEVAQQK.[S]	7.28875e-05	1.93435e-05	3	24	36	XP_005251037.1; EAW82172.1; XP_011515432.1	XP_005251037.1 [1651-1660]; EAW82172.1 [1673-1682]; XP_011515432.1 [1651-1660]		0	1143.6	0.797	0.949877	107.7	117.3	93.5	22.02	7.78	3.59	18.91	7.68
	FALSE	High	[R].LQEAGILSAEELQR.[L]	7.46144e-08	1.93435e-05	3	25	17	CAA91196.1; XP_005251037.1; XP_011515432.1	CAA91196.1 [2795-2808]; XP_005251037.1 [2663-2676]; XP_011515432.1 [2663-2676]		0	1556.83	0.947	0.780059	124.2	93.2	94.6	1.33	2.93	4.43	4.62	9.1
	FALSE	High	[R].LQEDKEQMAQQLAEETQGFQR.[T]	4.40295e-13	1.93435e-05	4	25	15	CAA91196.1; XP_005251037.1; EAW82172.1; XP_011515432.1	CAA91196.1 [2483-2503]; XP_005251037.1 [2351-2371]; EAW82172.1 [2373-2393]; XP_011515432.1 [2351-2371]		1	2507.18	0.587	0.974952	119	114.7	130.9	3.96	11.68	8.14	17.18	7.64
	FALSE	High	[R].LQLEACETR.[T]	0.000394524	4.2772e-05	4	26	35	CAA91196.1; XP_005251037.1; EAW82172.1; XP_011515432.1	CAA91196.1 [1131-1139]; XP_005251037.1 [999-1007]; EAW82172.1 [1021-1029]; XP_011515432.1 [999-1007]		0	1120.53	0.92	0.990383	98.4	100.3	122.1	11.11	3.93	7.66	13.92	3.14
	FALSE	High	[R].LQLEATER.[Q]	0.00321368	0.000367025	4	25	57	CAA91196.1; XP_005251037.1; EAW82172.1; XP_011515432.1	CAA91196.1 [1596-1603]; XP_005251037.1 [1464-1471]; EAW82172.1 [1486-1493]; XP_011515432.1 [1464-1471]		0	959.516	0.778	0.959601	104.7	107	115.6	11.39	5.88	1.77	3.19	19.83
	FALSE	High	[R].LQLEETDHQK.[N]	1.20723e-05	1.93435e-05	4	26	35	CAA91196.1; XP_005251037.1; EAW82172.1; XP_011515432.1	CAA91196.1 [2330-2339]; XP_005251037.1 [2198-2207]; EAW82172.1 [2220-2229]; XP_011515432.1 [2198-2207]		0	1240.62	1.071	0.645692	131.3	84	107.6	13.41	8.16	12.12	11.21	6.96
	FALSE	High	[K].LQMEAGLCEEQLNQADALLQSDVR.[L]	6.01647e-16	1.93435e-05	3	25	15	XP_005251037.1; EAW82172.1; XP_011515432.1	XP_005251037.1 [406-429]; EAW82172.1 [428-451]; XP_011515432.1 [406-429]		0	2732.29	7.305	0.902127	30.5	37.4	144.7	25	63.2	88.8	26.06	143.03
	FALSE	High	[K].LQMEAGLCEEQLNQADALLQSDVR.[L]	2.04104e-07	1.93435e-05	3	25	1	XP_005251037.1; EAW82172.1; XP_011515432.1	XP_005251037.1 [406-429]; EAW82172.1 [428-451]; XP_011515432.1 [406-429]		0	2748.28	3.428	0.610212	126.2	52.7	39.2	40.88	52.61	36.94	62.37	52.52
	FALSE	High	[K].LQNVQIALDYLR.[H]	4.36999e-05	1.93435e-05	4	26	15	CAA91196.1; XP_005251037.1; EAW82172.1; XP_011515432.1	CAA91196.1 [237-248]; XP_005251037.1 [105-116]; EAW82172.1 [127-138]; XP_011515432.1 [109-120]		0	1445.81	0.643	0.97018	111.4	114.5	119.1	4.29	0.8	1.85	10.51	2.24
	FALSE	High	[R].LRAETEQGEQQR.[Q]	0.0365253	0.00300596	4	25	4	CAA91196.1; XP_005251037.1; EAW82172.1; XP_011515432.1	CAA91196.1 [1855-1866]; XP_005251037.1 [1723-1734]; EAW82172.1 [1745-1756]; XP_011515432.1 [1723-1734]		1	1444.71	2.116	0.999517	80.1	99.2	118.5	39.92	46.02	15.51	30.59	40.48
	FALSE	High	[R].LREQLQLLEEQHR.[A]	6.76095e-05	1.93435e-05	3	25	5	CAA91196.1; XP_005251037.1; XP_011515432.1	CAA91196.1 [2731-2743]; XP_005251037.1 [2599-2611]; XP_011515432.1 [2599-2611]		1	1691.92	0.374	0.112721	52	78.6	307.6	14.31	14.7	7.41	60.2	11.53
	FALSE	High	[R].LRIEEEIR.[V]	0.0156676	0.00137497	4	25	16	CAA91196.1; XP_005251037.1; EAW82172.1; XP_011515432.1	CAA91196.1 [1585-1592]; XP_005251037.1 [1453-1460]; EAW82172.1 [1475-1482]; XP_011515432.1 [1453-1460]		1	1057.6	0.707	0.992443	120.7	111.1	147.7	17.7	29.61	27.7	23.28	7.4
	FALSE	High	[R].LRLPLDK.[E]	0.10294	0.00769842	4	26	4	CAA91196.1; XP_005251037.1; EAW82172.1; XP_011515432.1	CAA91196.1 [1144-1150]; XP_005251037.1 [1012-1018]; EAW82172.1 [1034-1040]; XP_011515432.1 [1012-1018]		1	854.546	1.49	0.941175	115.9	71.6	80.1	1.52	18.01	14.88	42.21	16.66
	FALSE	High	[R].LRLPLDKEPAR.[E]	2.89324e-06	1.93435e-05	4	26	23	CAA91196.1; XP_005251037.1; EAW82172.1; XP_011515432.1	CAA91196.1 [1144-1154]; XP_005251037.1 [1012-1022]; EAW82172.1 [1034-1044]; XP_011515432.1 [1012-1022]		2	1307.78	0.646	0.351817	79.3	143.3	118.4	24.47	10.87	21.04	50.46	36.13
	FALSE	High	[R].LSAEAEK.[V]	0.0672285	0.00497574	4	26	15	CAA91196.1; XP_005251037.1; EAW82172.1; XP_011515432.1	CAA91196.1 [1180-1186]; XP_005251037.1 [1048-1054]; EAW82172.1 [1070-1076]; XP_011515432.1 [1048-1054]		0	747.388	1.197	0.965725	94.7	114	57.2	5.98	15.64	6.71	19.62	6.64
	FALSE	High	[R].LSFSGLR.[AS]	0.0722648	0.00525446	3	25	25	CAA91196.1; XP_005251037.1; XP_011515432.1	CAA91196.1 [3440-3446]; XP_005251037.1 [3308-3314]; XP_011515432.1 [3308-3314]		0	779.441	0.818	0.973865	111.4	105.9	104.5	2.87	6.24	7.53	10.35	9.41
	FALSE	High	[K].LSIYNALK.[K]	0.00306154	0.00034628	3	25	11	CAA91196.1; XP_005251037.1; XP_011515432.1	CAA91196.1 [3175-3182]; XP_005251037.1 [3043-3050]; XP_011515432.1 [3043-3050]		0	921.54	100	6.09287e-17	139.4	3	182	3.47	19.92	8.91		10.18
	FALSE	High	[R].LSVAAQEAAR.[L]	5.99451e-05	1.93435e-05	4	26	28	CAA91196.1; XP_005251037.1; EAW82172.1; XP_011515432.1	CAA91196.1 [2420-2429]; XP_005251037.1 [2288-2297]; EAW82172.1 [2310-2319]; XP_011515432.1 [2288-2297]		0	1015.55	0.895	0.998657	115.2	110.6	83.8	11.72	5.94	7.8	3.71	11.45
	FALSE	High	[K].LSVYAALQR.[Q]	0.0598493	0.00462657	3	25	1	CAA91196.1; XP_005251037.1; XP_011515432.1	CAA91196.1 [2847-2855]; XP_005251037.1 [2715-2723]; XP_011515432.1 [2715-2723]		0	1020.58	100	6.09287e-17	196.1		55.4	16.22	42.03	21.67		17.56
	FALSE	High	[R].LSVYQAMK.[K]	0.0061931	0.00069399	3	26	15	CAA91196.1; XP_005251037.1; XP_011515432.1	CAA91196.1 [4084-4091]; XP_005251037.1 [3952-3959]; XP_011515432.1 [3952-3959]		0	939.497	0.968	0.781045	80.9	114.3	112.9	1.54	4.94	8.24	8.92	0.23
	FALSE	High	[R].LSYTQLLR.[R]	0.00352363	0.000427246	2	25	21	XP_005251037.1; XP_011515432.1	XP_005251037.1 [3860-3867]; XP_011515432.1 [3860-3867]		0	993.573	0.86	0.98407	108.6	95.4	124	9.59	5.7	3.19	21.84	9.23
	FALSE	High	[R].LTAEDLFEAR.[I]	0.000100918	1.93435e-05	2	25	13	XP_005251037.1; XP_011515432.1	XP_005251037.1 [3652-3661]; XP_011515432.1 [3652-3661]		0	1164.59	0.809	0.936122	119.9	110.6	95.8	2.03	3.04	1.02	1.69	2.66
	FALSE	High	[R].LTVDEAVR.[AK]	0.00673302	0.000722819	3	26	30	CAA91196.1; XP_005251037.1; XP_011515432.1	CAA91196.1 [3213-3220]; [3879-3886]; XP_005251037.1 [3081-3088]; [3747-3754]; XP_011515432.1 [3081-3088]; [3747-3754]		0	902.494	0.936	0.940651	107.8	93.8	98.6	6.74	2.66	1.79	8.3	3.15
	FALSE	High	[RK].LTVEEAVR.[HM]	0.0108331	0.000986687	4	56	27	CAA91196.1; XP_005251037.1; XP_006710598.1; XP_011515432.1	CAA91196.1 [4122-4129]; XP_005251037.1 [3990-3997]; XP_006710598.1 [1779-1786]; XP_011515432.1 [3990-3997]		0	916.51	0.853	0.850012	135.1	95.9	99.7	12.28	1.6	6.15	14.21	3.6
	FALSE	High	[R].LTVNEAVK.[E]	0.00284656	0.000304168	3	25	14	CAA91196.1; XP_005251037.1; XP_011515432.1	CAA91196.1 [2885-2892]; XP_005251037.1 [2753-2760]; XP_011515432.1 [2753-2760]		0	873.504	1.362	0.403053	136.1	67.3	95	15.4	5.53	5.7	4.77	10.94
	FALSE	High	[R].LVASMEEAR.[R]	0.000650131	6.84312e-05	3	25	18	CAA91196.1; XP_005251037.1; XP_011515432.1	CAA91196.1 [2685-2693]; XP_005251037.1 [2553-2561]; XP_011515432.1 [2553-2561]		0	1005.5	1.095	0.82098	170.7	104.8	52.3	41.33	22.6	10.02	34.49	22.21
	FALSE	High	[R].LYVHEAVK.[A]	0.00303198	0.00034628	3	25	15	CAA91196.1; XP_005251037.1; XP_011515432.1	CAA91196.1 [3544-3551]; XP_005251037.1 [3412-3419]; XP_011515432.1 [3412-3419]		0	958.536	1.102	0.998309	88.3	96.2	123	28.88	22.17	17.77	19.01	14.47
	FALSE	High	[R].MGIVGPEFK.[D]	0.00817022	0.000772347	3	26	22	CAA91196.1; XP_005251037.1; XP_011515432.1	CAA91196.1 [4130-4138]; XP_005251037.1 [3998-4006]; XP_011515432.1 [3998-4006]		0	977.512	0.947	6.09287e-17	101	111.2	150.5	49.81	64.1		33.14	23.99
	FALSE	High	[K].MQAVQEATR.[L]	0.000926249	9.10162e-05	4	25	7	CAA91196.1; XP_005251037.1; EAW82172.1; XP_011515432.1	CAA91196.1 [2453-2461]; XP_005251037.1 [2321-2329]; EAW82172.1 [2343-2351]; XP_011515432.1 [2321-2329]		0	1033.51	0.88	6.09287e-17		146.2	126.7	13.53	23.51		4.29	2.29
	FALSE	High	[K].MQAVQEATR.[L]	0.00238935	0.000195525	4	25	5	CAA91196.1; XP_005251037.1; EAW82172.1; XP_011515432.1	CAA91196.1 [2453-2461]; XP_005251037.1 [2321-2329]; EAW82172.1 [2343-2351]; XP_011515432.1 [2321-2329]		0	1049.5	0.422	0.000879656	69.3	106.2	134.9	66.9	0.71	79.55	86.09	20.83
	FALSE	High	[R].MQEEVVR.[R]	0.0393666	0.00324965	3	24	21	XP_005251037.1; EAW82172.1; XP_011515432.1	XP_005251037.1 [1402-1408]; EAW82172.1 [1424-1430]; XP_011515432.1 [1402-1408]		0	890.44	0.897	0.944028	130.3	92.1	94.3	19.47	7.11	15.86	7.31	4.78
	FALSE	High	[R].MQEEVVR.[R]	0.0718641	0.00524065	3	24	3	XP_005251037.1; EAW82172.1; XP_011515432.1	XP_005251037.1 [1402-1408]; EAW82172.1 [1424-1430]; XP_011515432.1 [1402-1408]		0	906.435	0.01	0.0199932	159.2	148.4	117.2		26.72	40.96	119.62	15.81
	FALSE	High	[K].MSAAQALK.[K]	0.0121796	0.00109357	3	26	18	CAA91196.1; XP_005251037.1; XP_011515432.1	CAA91196.1 [4505-4512]; XP_005251037.1 [4373-4380]; XP_011515432.1 [4373-4380]		0	819.439	0.803	0.941529	151	93.6	86.4	16.39	14.35	14.77	14.01	16.64
	FALSE	High	[R].MVEGYQGLR.[C]	0.000163769	4.2772e-05	4	26	33	CAA91196.1; XP_005251037.1; EAW82172.1; XP_011515432.1	CAA91196.1 [308-316]; XP_005251037.1 [176-184]; EAW82172.1 [198-206]; XP_011515432.1 [180-188]		0	1052.52	0.897	0.954296	102.5	97.9	132.9	9.19	4.29	5.02	18.55	6.11
	FALSE	High	[R].MVEGYQGLR.[C]	0.0111686	0.000986687	4	26	4	CAA91196.1; XP_005251037.1; EAW82172.1; XP_011515432.1	CAA91196.1 [308-316]; XP_005251037.1 [176-184]; EAW82172.1 [198-206]; XP_011515432.1 [180-188]		0	1068.51
	FALSE	High	[R].NDDIADGNPK.[L]	0.00271156	0.000282962	4	25	8	CAA91196.1; XP_005251037.1; EAW82172.1; XP_011515432.1	CAA91196.1 [259-268]; XP_005251037.1 [127-136]; EAW82172.1 [149-158]; XP_011515432.1 [131-140]		0	1058.47	0.01	6.09287e-17		293.8			132.57		17.47
	FALSE	High	[R].NLVDNITGQR.[L]	0.000295895	4.2772e-05	3	26	19	CAA91196.1; XP_005251037.1; XP_011515432.1	CAA91196.1 [4438-4447]; XP_005251037.1 [4306-4315]; XP_011515432.1 [4306-4315]		0	1129.6	0.78	0.994224	108.3	110.6	101.8	3.31	5.16	3	7.99	7.77
	FALSE	High	[K].QAADAEMEK.[H]	0.000992017	0.000139161	4	26	32	CAA91196.1; XP_005251037.1; EAW82172.1; XP_011515432.1	CAA91196.1 [2298-2306]; XP_005251037.1 [2166-2174]; EAW82172.1 [2188-2196]; XP_011515432.1 [2166-2174]		0	992.435	0.648	0.837349	96.1	114.7	107.1	45.54	34.14	19.16	14.03	17.23
	FALSE	High	[K].QAEEIGEK.[L]	0.00625417	0.000710402	4	25	18	CAA91196.1; XP_005251037.1; EAW82172.1; XP_011515432.1	CAA91196.1 [2546-2553]; XP_005251037.1 [2414-2421]; EAW82172.1 [2436-2443]; XP_011515432.1 [2414-2421]		0	903.442	0.747	0.984003	132.3	108.7	92.8	10.45	7.03	11.03	26.23	26.99
	FALSE	High	[R].QAEVELASR.[V]	0.0112828	0.00100559	4	25	7	CAA91196.1; XP_005251037.1; EAW82172.1; XP_011515432.1	CAA91196.1 [1649-1657]; XP_005251037.1 [1517-1525]; EAW82172.1 [1539-1547]; XP_011515432.1 [1517-1525]		0	985.495	2.47	0.990868	74.3	82.9	40.9	56.46	57.23	14.49	32.81	10.09
	FALSE	High	[R].QAEVELASR.[V]	0.000659817	9.10162e-05	4	25	16	CAA91196.1; XP_005251037.1; EAW82172.1; XP_011515432.1	CAA91196.1 [1649-1657]; XP_005251037.1 [1517-1525]; EAW82172.1 [1539-1547]; XP_011515432.1 [1517-1525]		0	1002.52	1.059	0.17461	181.8	62.2	78.5	15.93	9.41	8.01	5.53	10.38
	FALSE	High	[R].QALHSLELHYQAFLR.[D]	2.45261e-05	1.93435e-05	4	26	3	CAA91196.1; XP_005251037.1; EAW82172.1; XP_011515432.1	CAA91196.1 [1061-1075]; XP_005251037.1 [929-943]; EAW82172.1 [951-965]; XP_011515432.1 [929-943]		0	1808.94	0.75	0.376247	177.8	79	63.3	17.1	25.28	3.95	20.62	7.58
	FALSE	High	[K].QEELQQLEQQR.[R]	0.000146765	4.2772e-05	3	25	2	CAA91196.1; XP_005251037.1; XP_011515432.1	CAA91196.1 [2707-2717]; XP_005251037.1 [2575-2585]; XP_011515432.1 [2575-2585]		0	1411.68	0.759	0.383803	76.5	142.4	124.2	33.81	0.83	4.91	77.31	7.3
	FALSE	High	[K].QEELQQLEQQR.[R]	6.96664e-07	1.93435e-05	3	25	11	CAA91196.1; XP_005251037.1; XP_011515432.1	CAA91196.1 [2707-2717]; XP_005251037.1 [2575-2585]; XP_011515432.1 [2575-2585]		0	1428.71	0.958	0.985512	126.3	100.1	65	8.43	11.43	3.09	15.76	41.31
	FALSE	High	[R].QEELYSELQAR.[E]	3.85409e-06	1.93435e-05	2	24	14	XP_005251037.1; XP_011515432.1	XP_005251037.1 [3226-3236]; XP_011515432.1 [3226-3236]		0	1365.66	1.109	0.590742	149.7	84.2	65.2	11.56	7.09	9.01	10.05	13.12
	FALSE	High	[R].QELEAELAK.[V]	0.00098717	0.000139161	4	25	10	CAA91196.1; XP_005251037.1; EAW82172.1; XP_011515432.1	CAA91196.1 [1888-1896]; XP_005251037.1 [1756-1764]; EAW82172.1 [1778-1786]; XP_011515432.1 [1756-1764]		0	1030.54	0.97	0.740194	143.5	80.8	91.2	6.63	2.68	3.25	9.12	4.95
	FALSE	High	[R].QEQALLEEIER.[H]	4.83141e-05	1.93435e-05	4	26	13	CAA91196.1; XP_005251037.1; EAW82172.1; XP_011515432.1	CAA91196.1 [1387-1397]; XP_005251037.1 [1255-1265]; EAW82172.1 [1277-1287]; XP_011515432.1 [1255-1265]		0	1340.67	0.939	0.950447	126.3	102.3	76.5	13.32	12.04	6.32	4.15	8.74
	FALSE	High	[R].QEQALLEEIER.[H]	8.02058e-07	1.93435e-05	4	26	10	CAA91196.1; XP_005251037.1; EAW82172.1; XP_011515432.1	CAA91196.1 [1387-1397]; XP_005251037.1 [1255-1265]; EAW82172.1 [1277-1287]; XP_011515432.1 [1255-1265]		0	1357.7	1.222	0.940227	115.2	82.9	80.3	17.31	1.57	6.24	6.77	5.12
	FALSE	High	[R].QEQIQAMPLADSQAVR.[E]	1.19676e-10	1.93435e-05	4	26	21	CAA91196.1; XP_005251037.1; EAW82172.1; XP_011515432.1	CAA91196.1 [1367-1382]; XP_005251037.1 [1235-1250]; EAW82172.1 [1257-1272]; XP_011515432.1 [1235-1250]		0	1784.9	0.94	0.46019	161	80.3	75.3	11.79	6.37	4.94	20.84	0.34
	FALSE	High	[R].QHEAEEGVR.[R]	0.000297367	4.2772e-05	3	25	19	CAA91196.1; XP_005251037.1; XP_011515432.1	CAA91196.1 [2696-2704]; XP_005251037.1 [2564-2572]; XP_011515432.1 [2564-2572]		0	1037.46	0.928	0.964536	112	121.7	87.4	13.96	33.14	24.63	38.23	34.14
	FALSE	High	[R].QHEAEEGVR.[R]	0.0232891	0.00177699	3	25	4	CAA91196.1; XP_005251037.1; XP_011515432.1	CAA91196.1 [2696-2704]; XP_005251037.1 [2564-2572]; XP_011515432.1 [2564-2572]		0	1054.49	4.996	4.77377e-05	174.6	28	97	8.25	48.45	31.87	48.32	42.71
	FALSE	High	[R].QLAAEEER.[R]	0.0395783	0.00326561	4	26	6	CAA91196.1; XP_005251037.1; EAW82172.1; XP_011515432.1	CAA91196.1 [2111-2118]; XP_005251037.1 [1979-1986]; EAW82172.1 [2001-2008]; XP_011515432.1 [1979-1986]		0	928.437	1.355	0.951062	75.4	80.8	182.9	20.5	19.99	0.31	26.66	28.55
	FALSE	High	[R].QLAAEEER.[R]	0.0105617	0.000951775	4	26	22	CAA91196.1; XP_005251037.1; EAW82172.1; XP_011515432.1	CAA91196.1 [2111-2118]; XP_005251037.1 [1979-1986]; EAW82172.1 [2001-2008]; XP_011515432.1 [1979-1986]		0	945.464	1.213	0.97439	112.7	118.4	86.2	17.52	28.43	23.74	22.65	22.18
	FALSE	High	[R].QLAEAHAQAK.[A]	6.46272e-05	1.93435e-05	4	25	8	CAA91196.1; XP_005251037.1; EAW82172.1; XP_011515432.1	CAA91196.1 [1511-1520]; XP_005251037.1 [1379-1388]; EAW82172.1 [1401-1410]; XP_011515432.1 [1379-1388]		0	1049.54	0.01	0.997694	112	101	103.5		20.31	4.92	15.49	14.59
	FALSE	High	[R].QLAEAHAQAK.[A]	5.39525e-05	1.93435e-05	4	25	46	CAA91196.1; XP_005251037.1; EAW82172.1; XP_011515432.1	CAA91196.1 [1511-1520]; XP_005251037.1 [1379-1388]; EAW82172.1 [1401-1410]; XP_011515432.1 [1379-1388]		0	1066.56	0.632	0.981819	105.7	95.9	114.8	1.08	25.38	4.46	32.1	9.73
	FALSE	High	[R].QLAEEDAAR.[Q]	0.00592592	0.000634693	4	26	8	CAA91196.1; XP_005251037.1; EAW82172.1; XP_011515432.1	CAA91196.1 [1955-1963]; XP_005251037.1 [1823-1831]; EAW82172.1 [1845-1853]; XP_011515432.1 [1823-1831]		0	985.459	1.046	0.742346	135.4	75	101.8	10.9	8.2	8.55	25.43	7.19
	FALSE	High	[R].QLAEEDAAR.[Q]	0.000446542	4.2772e-05	4	26	26	CAA91196.1; XP_005251037.1; EAW82172.1; XP_011515432.1	CAA91196.1 [1955-1963]; XP_005251037.1 [1823-1831]; EAW82172.1 [1845-1853]; XP_011515432.1 [1823-1831]		0	1002.49	1.048	0.978903	110.4	90.9	107.6	13.91	15.11	10.37	3.28	5.49
	FALSE	High	[R].QLAEEDLAQQR.[A]	9.8919e-05	1.93435e-05	4	26	8	CAA91196.1; XP_005251037.1; EAW82172.1; XP_011515432.1	CAA91196.1 [2432-2442]; XP_005251037.1 [2300-2310]; EAW82172.1 [2322-2332]; XP_011515432.1 [2300-2310]		0	1283.62	1.108	0.869204	114.3	93	105.2	9.89	6.95	9.3	3.94	5.49
	FALSE	High	[R].QLAEEDLAQQR.[A]	2.01405e-06	1.93435e-05	4	26	41	CAA91196.1; XP_005251037.1; EAW82172.1; XP_011515432.1	CAA91196.1 [2432-2442]; XP_005251037.1 [2300-2310]; EAW82172.1 [2322-2332]; XP_011515432.1 [2300-2310]		0	1300.65	0.895	0.811516	89	110.8	106.4	6.32	4.95	6.67	5.55	3.62
	FALSE	High	[R].QLAEGTAQQR.[L]	0.00183625	0.000154191	4	25	11	CAA91196.1; XP_005251037.1; EAW82172.1; XP_011515432.1	CAA91196.1 [1836-1845]; XP_005251037.1 [1704-1713]; EAW82172.1 [1726-1735]; XP_011515432.1 [1704-1713]		0	1084.54	0.656	0.980806	123.1	110.4	95.5	19.9	36.6	2.74	20.24	13.92
	FALSE	High	[R].QLAEGTAQQR.[L]	3.10587e-05	1.93435e-05	4	25	37	CAA91196.1; XP_005251037.1; EAW82172.1; XP_011515432.1	CAA91196.1 [1836-1845]; XP_005251037.1 [1704-1713]; EAW82172.1 [1726-1735]; XP_011515432.1 [1704-1713]		0	1101.56	0.833	0.998309	112	105.3	102.6	11.2	13.46	6.59	27.48	27.13
	FALSE	High	[R].QLEMSAEAER.[L]	0.00258287	0.000217647	4	25	2	CAA91196.1; XP_005251037.1; EAW82172.1; XP_011515432.1	CAA91196.1 [2512-2521]; XP_005251037.1 [2380-2389]; EAW82172.1 [2402-2411]; XP_011515432.1 [2380-2389]		0	1146.51	0.784	0.981348	116.6	105.5	103.5	14.26	2.14	6.19	2.13	5.65
	FALSE	Medium	[R].QLEMSAEAER.[L]	0.407477	0.0320978	4	25	1	CAA91196.1; XP_005251037.1; EAW82172.1; XP_011515432.1	CAA91196.1 [2512-2521]; XP_005251037.1 [2380-2389]; EAW82172.1 [2402-2411]; XP_011515432.1 [2380-2389]		0	1162.5
	FALSE	High	[R].QLEMSAEAER.[L]	7.21607e-05	1.93435e-05	4	25	17	CAA91196.1; XP_005251037.1; EAW82172.1; XP_011515432.1	CAA91196.1 [2512-2521]; XP_005251037.1 [2380-2389]; EAW82172.1 [2402-2411]; XP_011515432.1 [2380-2389]		0	1163.54	0.787	0.91885	101.4	114.9	109.4	22.03	7.29	4.32	8.94	4.97
	FALSE	High	[R].QLEMSAEAER.[L]	0.000693142	9.10162e-05	4	25	4	CAA91196.1; XP_005251037.1; EAW82172.1; XP_011515432.1	CAA91196.1 [2512-2521]; XP_005251037.1 [2380-2389]; EAW82172.1 [2402-2411]; XP_011515432.1 [2380-2389]		0	1179.53		6.09287e-17	156.5		132.8			26.64		51.74
	FALSE	High	[R].QLLEEELAR.[L]	0.00179197	0.000154191	4	25	7	CAA91196.1; XP_005251037.1; EAW82172.1; XP_011515432.1	CAA91196.1 [1867-1875]; XP_005251037.1 [1735-1743]; EAW82172.1 [1757-1765]; XP_011515432.1 [1735-1743]		0	1083.57	0.731	0.946542	139.8	137.5	6.1	49.32	44.59	75.22	13.44	153.75
	FALSE	High	[R].QLLEEELAR.[L]	0.000338314	4.2772e-05	4	25	8	CAA91196.1; XP_005251037.1; EAW82172.1; XP_011515432.1	CAA91196.1 [1867-1875]; XP_005251037.1 [1735-1743]; EAW82172.1 [1757-1765]; XP_011515432.1 [1735-1743]		0	1100.59	0.936	0.965443	119.2	100	96.6	4.95	6.53	4.81	13.14	5.29
	FALSE	High	[R].QLLSPGTALILLEAQAASGFLLDPVR.[N]	9.92146e-09	1.93435e-05	3	25	15	CAA91196.1; XP_005251037.1; XP_011515432.1	CAA91196.1 [2856-2881]; XP_005251037.1 [2724-2749]; XP_011515432.1 [2724-2749]		0	2676.5	0.069	0.824317	154.9	97.4	109.5		36.37	34.76	22.89	9.24
	FALSE	High	[R].QLLSPGTALILLEAQAASGFLLDPVR.[N]	4.72429e-13	1.93435e-05	3	25	10	CAA91196.1; XP_005251037.1; XP_011515432.1	CAA91196.1 [2856-2881]; XP_005251037.1 [2724-2749]; XP_011515432.1 [2724-2749]		0	2693.52	0.01	0.333259	109.3	169.3	122.3		71.15	52.8	53.51	70.34
	FALSE	High	[R].QLQLAQEAAQK.[R]	1.4911e-05	1.93435e-05	4	26	13	CAA91196.1; XP_005251037.1; EAW82172.1; XP_011515432.1	CAA91196.1 [2172-2182]; XP_005251037.1 [2040-2050]; EAW82172.1 [2062-2072]; XP_011515432.1 [2040-2050]		0	1227.67	0.686	0.770481	156.7	86.3	103.6	10.63	8.23	10.72	6.58	13.69
	FALSE	High	[K].QITMEELVR.[S]	0.00158606	0.000154191	3	26	6	CAA91196.1; XP_005251037.1; XP_011515432.1	CAA91196.1 [4028-4036]; XP_005251037.1 [3896-3904]; XP_011515432.1 [3896-3904]		0	1101.56	0.934	0.963403	127.7	98.8	93.6	7.93	9.12	7.12	10.65	5.82
	FALSE	High	[K].QITMEELVR.[S]	0.000323542	4.2772e-05	3	26	15	CAA91196.1; XP_005251037.1; XP_011515432.1	CAA91196.1 [4028-4036]; XP_005251037.1 [3896-3904]; XP_011515432.1 [3896-3904]		0	1118.59	0.948	0.88519	133.2	94.4	87.4	17.13	7.61	4.3	11.81	13.18
	FALSE	High	[R].QQEELLAEENQR.[L]	2.23848e-06	1.93435e-05	3	25	5	CAA91196.1; XP_005251037.1; XP_011515432.1	CAA91196.1 [2719-2730]; XP_005251037.1 [2587-2598]; XP_011515432.1 [2587-2598]		0	1469.69	3.873	1.9445e-06	204.5	25.5	88.3	65.25	10.85	12.27	45.03
	FALSE	High	[R].QQEELLAEENQR.[L]	5.68623e-08	1.93435e-05	3	25	33	CAA91196.1; XP_005251037.1; XP_011515432.1	CAA91196.1 [2719-2730]; XP_005251037.1 [2587-2598]; XP_011515432.1 [2587-2598]		0	1486.71	0.856	0.92891	128.8	93.7	93.3	11.83	15.11	4.84	6.36	6.07
	FALSE	High	[R].QQGLASYDYVR.[R]	0.00455546	0.000502794	3	26	4	CAA91196.1; XP_005251037.1; XP_011515432.1	CAA91196.1 [3771-3781]; XP_005251037.1 [3639-3649]; XP_011515432.1 [3639-3649]		0	1282.61	2.123	0.48864	112	89.8	141.1	54.68	9.75	12.24	79.82	12.44
	FALSE	High	[R].QQGLASYDYVR.[R]	6.21537e-06	1.93435e-05	3	26	15	CAA91196.1; XP_005251037.1; XP_011515432.1	CAA91196.1 [3771-3781]; XP_005251037.1 [3639-3649]; XP_011515432.1 [3639-3649]		0	1299.63	0.763	0.960442	125.5	100.8	108.5	4.41	0.99	3.69	11.01	3.47
	FALSE	High	[R].QQQQMEQER.[Q]	0.00226469	0.000195525	3	25	10	CAA91196.1; XP_005251037.1; XP_011515432.1	CAA91196.1 [2674-2682]; XP_005251037.1 [2542-2550]; XP_011515432.1 [2542-2550]		0	1187.51	1.729	0.556437	137.3	62.6	79.1	12.79	7.17	7.8	26.14	6.36
	FALSE	High	[R].QQQQMEQER.[Q]	0.00029443	4.2772e-05	3	25	36	CAA91196.1; XP_005251037.1; XP_011515432.1	CAA91196.1 [2674-2682]; XP_005251037.1 [2542-2550]; XP_011515432.1 [2542-2550]		0	1204.54	0.71	0.993552	109.4	104.4	103.2	5.71	23.17	20.66	1.23	6.41
	FALSE	High	[R].QRELAEQELEK.[Q]	0.129764	0.00940438	4	25	1	CAA91196.1; XP_005251037.1; EAW82172.1; XP_011515432.1	CAA91196.1 [1823-1833]; XP_005251037.1 [1691-1701]; EAW82172.1 [1713-1723]; XP_011515432.1 [1691-1701]		1	1372.71
	FALSE	High	[K].QRLEAEAGR.[F]	0.00286042	0.000304168	4	26	8	CAA91196.1; XP_005251037.1; EAW82172.1; XP_011515432.1	CAA91196.1 [1924-1932]; XP_005251037.1 [1792-1800]; EAW82172.1 [1814-1822]; XP_011515432.1 [1792-1800]		1	1029.54	0.611	0.230848	64.9	137.1	169.3	35.44	43.67	12.79	6.73	52.57
	FALSE	High	[K].QSAEEQAQAR.[A]	0.0011545	0.000154191	4	26	6	CAA91196.1; XP_005251037.1; EAW82172.1; XP_011515432.1	CAA91196.1 [2256-2265]; XP_005251037.1 [2124-2133]; EAW82172.1 [2146-2155]; XP_011515432.1 [2124-2133]		0	1100.5	1.05	0.881613	132.4	112.4	67.7	73.88	31.21	10.29	37.68
	FALSE	High	[K].QSAEEQAQAR.[A]	2.56608e-05	1.93435e-05	4	26	32	CAA91196.1; XP_005251037.1; EAW82172.1; XP_011515432.1	CAA91196.1 [2256-2265]; XP_005251037.1 [2124-2133]; EAW82172.1 [2146-2155]; XP_011515432.1 [2124-2133]		0	1117.52	0.463	0.659287	104.1	141.5	69.1	3.44	30.87	17.03	34.43	11.2
	FALSE	High	[R].QSSEAEIQAK.[A]	0.00207444	0.000195525	4	25	4	CAA91196.1; XP_005251037.1; EAW82172.1; XP_011515432.1	CAA91196.1 [1564-1573]; XP_005251037.1 [1432-1441]; EAW82172.1 [1454-1463]; XP_011515432.1 [1432-1441]		0	1073.51	1.267	0.948146	114.1	84.2	101.2	14.38	23.59	11.84	65.86	20.94
	FALSE	High	[R].QSSEAEIQAK.[A]	0.000118421	1.93435e-05	4	25	28	CAA91196.1; XP_005251037.1; EAW82172.1; XP_011515432.1	CAA91196.1 [1564-1573]; XP_005251037.1 [1432-1441]; EAW82172.1 [1454-1463]; XP_011515432.1 [1432-1441]		0	1090.54	1.109	0.984003	109.2	124.9	92.4	19.47	26.26	25.1	20.37	21.85
	FALSE	High	[R].QTLSIYQALK.[K]	0.000320347	4.2772e-05	3	26	9	CAA91196.1; XP_005251037.1; XP_011515432.1	CAA91196.1 [3839-3848]; XP_005251037.1 [3707-3716]; XP_011515432.1 [3707-3716]		0	1164.66	0.657	0.937562	134.2	97.8	105.8	15.84	3.51	13.56	4.17	6.37
	FALSE	High	[R].QTNLENLDQAFSVAER.[D]	3.11882e-09	1.93435e-05	4	26	4	CAA91196.1; XP_005251037.1; EAW82172.1; XP_011515432.1	CAA91196.1 [350-365]; XP_005251037.1 [218-233]; EAW82172.1 [240-255]; XP_011515432.1 [222-237]		0	1817.87
	FALSE	High	[R].QTNLENLDQAFSVAER.[D]	4.76568e-11	1.93435e-05	4	26	19	CAA91196.1; XP_005251037.1; EAW82172.1; XP_011515432.1	CAA91196.1 [350-365]; XP_005251037.1 [218-233]; EAW82172.1 [240-255]; XP_011515432.1 [222-237]		0	1834.89	0.942	0.853726	138.4	89.5	79.4	3.25	4.1	5.2	6.64	4.95
	FALSE	High	[K].QVAEEAAR.[L]	0.129764	0.00940438	4	26	4	CAA91196.1; XP_005251037.1; EAW82172.1; XP_011515432.1	CAA91196.1 [2412-2419]; XP_005251037.1 [2280-2287]; EAW82172.1 [2302-2309]; XP_011515432.1 [2280-2287]		0	856.416	1.436	0.753803	136.7	75.2	100.4	3.47	4.75	11.36	1.82	0.85
	FALSE	High	[K].QVAEEAAR.[L]	0.0120558	0.00109357	4	26	33	CAA91196.1; XP_005251037.1; EAW82172.1; XP_011515432.1	CAA91196.1 [2412-2419]; XP_005251037.1 [2280-2287]; EAW82172.1 [2302-2309]; XP_011515432.1 [2280-2287]		0	873.442	0.701	0.761937	100	126.7	90.5	6.04	11.97	7.85	23.45	16.06
	FALSE	High	[R].QVEEEILALK.[A]	5.5046e-05	1.93435e-05	4	26	12	CAA91196.1; XP_005251037.1; EAW82172.1; XP_011515432.1	CAA91196.1 [2059-2068]; XP_005251037.1 [1927-1936]; EAW82172.1 [1949-1958]; XP_011515432.1 [1927-1936]		0	1154.63	0.812	0.973883	141.9	145.7		8.96	2.07	0.7	2.54
	FALSE	High	[R].QVEEEILALK.[A]	0.00572646	0.000615159	4	26	1	CAA91196.1; XP_005251037.1; EAW82172.1; XP_011515432.1	CAA91196.1 [2059-2068]; XP_005251037.1 [1927-1936]; EAW82172.1 [1949-1958]; XP_011515432.1 [1927-1936]		0	1171.66	0.972	0.989403	106.3	108.3	77.9	4.68	2.21	2.45	8.24	6.71
	FALSE	High	[K].QVEVTVHK.[G]	0.0184013	0.00154512	4	26	9	CAA91196.1; XP_005251037.1; EAW82172.1; XP_011515432.1	CAA91196.1 [954-961]; XP_005251037.1 [822-829]; EAW82172.1 [844-851]; XP_011515432.1 [822-829]		0	922.499	1.357	6.09287e-17		115.3	56.8	7.2	10.32		34.13	17.71
	FALSE	High	[K].QVEVTVHK.[G]	0.00663423	0.000722819	4	26	11	CAA91196.1; XP_005251037.1; EAW82172.1; XP_011515432.1	CAA91196.1 [954-961]; XP_005251037.1 [822-829]; EAW82172.1 [844-851]; XP_011515432.1 [822-829]		0	939.526	1.199	0.980751	145.4	93.3	45.1	7.98	17.18	15.25	49.82	16.33
	FALSE	High	[K].QVEVTVHKGDECQLVGPAQPSHWK.[V]	5.67575e-09	1.93435e-05	4	26	5	CAA91196.1; XP_005251037.1; EAW82172.1; XP_011515432.1	CAA91196.1 [954-977]; XP_005251037.1 [822-845]; EAW82172.1 [844-867]; XP_011515432.1 [822-845]		1	2713.3	0.385	0.982219	135.9	111.8	137.9	15.33	27.94	18.78	22.75	10.51
	FALSE	High	[K].QVEVTVHKGDECQLVGPAQPSHWK.[V]	3.8071e-10	1.93435e-05	4	26	5	CAA91196.1; XP_005251037.1; EAW82172.1; XP_011515432.1	CAA91196.1 [954-977]; XP_005251037.1 [822-845]; EAW82172.1 [844-867]; XP_011515432.1 [822-845]		1	2730.33	0.217	0.992531	30.1	83.7	39		18.43	11.81	114.31	31.84
	FALSE	High	[R].QVQDESQR.[K]	0.0776816	0.00575757	4	25	2	CAA91196.1; XP_005251037.1; EAW82172.1; XP_011515432.1	CAA91196.1 [1639-1646]; XP_005251037.1 [1507-1514]; EAW82172.1 [1529-1536]; XP_011515432.1 [1507-1514]		0	972.438	0.988	0.983939	150.7	128.9		15.97	12.64	7.14	3.61
	FALSE	High	[R].QVQVALETAQR.[S]	0.00833516	0.000772347	4	25	1	CAA91196.1; XP_005251037.1; EAW82172.1; XP_011515432.1	CAA91196.1 [1699-1709]; XP_005251037.1 [1567-1577]; EAW82172.1 [1589-1599]; XP_011515432.1 [1567-1577]		0	1225.65	0.66	6.09287e-17	50.3	127	131.3	26.12	28		14.94
	FALSE	High	[R].QVQVALETAQR.[S]	1.58992e-06	1.93435e-05	4	25	22	CAA91196.1; XP_005251037.1; EAW82172.1; XP_011515432.1	CAA91196.1 [1699-1709]; XP_005251037.1 [1567-1577]; EAW82172.1 [1589-1599]; XP_011515432.1 [1567-1577]		0	1242.68	0.851	0.741019	154.2	76.1	101.8	13.97	9.05	9.18	11.03	4.6
	FALSE	High	[R].QYDIDDAIAK.[N]	0.000787731	9.10162e-05	3	26	6	CAA91196.1; XP_005251037.1; XP_011515432.1	CAA91196.1 [4339-4348]; XP_005251037.1 [4207-4216]; XP_011515432.1 [4207-4216]		0	1134.53	0.722	0.991475	116	116.7	101.9	9.66	7.99	2.48	9.83	4.73
	FALSE	High	[R].QYDIDDAIAK.[N]	0.000184552	4.2772e-05	3	26	16	CAA91196.1; XP_005251037.1; XP_011515432.1	CAA91196.1 [4339-4348]; XP_005251037.1 [4207-4216]; XP_011515432.1 [4207-4216]		0	1151.56	0.768	0.98585	114.3	109.3	99	9.41	4.75	5.65	8.02	3.54
	FALSE	High	[R].RAAEEAEEAR.[V]	0.00106239	0.000139161	4	26	2	CAA91196.1; XP_005251037.1; EAW82172.1; XP_011515432.1	CAA91196.1 [2225-2234]; XP_005251037.1 [2093-2102]; EAW82172.1 [2115-2124]; XP_011515432.1 [2093-2102]		1	1131.54		6.09287e-17	114.5		385.5			9.7		14.6
	FALSE	High	[R].RDDGTGQLLLPLSDAR.[K]	3.32515e-07	1.93435e-05	2	25	6	XP_005251037.1; XP_011515432.1	XP_005251037.1 [3871-3886]; XP_011515432.1 [3871-3886]		1	1726.91	0.823	0.88519	137.5	89.5	103.1	17.27	11.12	5.49	11.58	2.57
	FALSE	High	[R].REEAAVDAQQQK.[R]	4.21015e-10	1.93435e-05	4	25	51	CAA91196.1; XP_005251037.1; EAW82172.1; XP_011515432.1	CAA91196.1 [1541-1552]; XP_005251037.1 [1409-1420]; EAW82172.1 [1431-1442]; XP_011515432.1 [1409-1420]		1	1372.68	0.81	0.800919	101	117	95.2	19.59	20.54	10.43	19.18	5.43
	FALSE	High	[R].RFPSSFEEIEILWSQFLK.[F]	1.16703e-10	1.93435e-05	4	26	4	CAA91196.1; XP_005251037.1; EAW82172.1; XP_011515432.1	CAA91196.1 [443-460]; XP_005251037.1 [311-328]; EAW82172.1 [333-350]; XP_011515432.1 [311-328]		1	2256.17	0.01	0.158447	86	193.7	93.3		36.87	45.98	28.31	78.26
	FALSE	High	[R].RKQEELQQLEQQR.[R]	5.44965e-05	1.93435e-05	3	25	5	CAA91196.1; XP_005251037.1; XP_011515432.1	CAA91196.1 [2705-2717]; XP_005251037.1 [2573-2585]; XP_011515432.1 [2573-2585]		2	1712.9	0.01	6.09287e-17		143.6	356.4				44.89	14.17
	FALSE	High	[R].RLAEDEAFQR.[R]	0.0455314	0.00364	4	26	3	CAA91196.1; XP_005251037.1; EAW82172.1; XP_011515432.1	CAA91196.1 [2005-2014]; XP_005251037.1 [1873-1882]; EAW82172.1 [1895-1904]; XP_011515432.1 [1873-1882]		1	1234.62		6.09287e-17	41.6		458.4					12.33
	FALSE	Medium	[R].RLEEQAAQHK.[A]	0.370543	0.0279464	4	26	1	CAA91196.1; XP_005251037.1; EAW82172.1; XP_011515432.1	CAA91196.1 [2016-2025]; XP_005251037.1 [1884-1893]; EAW82172.1 [1906-1915]; XP_011515432.1 [1884-1893]		1	1209.63
	FALSE	High	[R].RPELEDSTLR.[Y]	6.42779e-07	1.93435e-05	4	26	31	CAA91196.1; XP_005251037.1; EAW82172.1; XP_011515432.1	CAA91196.1 [651-660]; XP_005251037.1 [519-528]; EAW82172.1 [541-550]; XP_011515432.1 [519-528]		0	1215.63	1.231	0.659628	131.2	90.3	91.8	28.57	6.62	9.97	23.71	19.59
	FALSE	High	[K].RQELEAELAK.[V]	4.11456e-06	1.93435e-05	4	25	31	CAA91196.1; XP_005251037.1; EAW82172.1; XP_011515432.1	CAA91196.1 [1887-1896]; XP_005251037.1 [1755-1764]; EAW82172.1 [1777-1786]; XP_011515432.1 [1755-1764]		1	1186.64	0.732	0.96677	96.6	109.6	140.3	25	17.7	10.69	25.09	21.16
	FALSE	High	[R].RQEQIQAMPLADSQAVR.[E]	1.86432e-07	1.93435e-05	4	26	6	CAA91196.1; XP_005251037.1; EAW82172.1; XP_011515432.1	CAA91196.1 [1366-1382]; XP_005251037.1 [1234-1250]; EAW82172.1 [1256-1272]; XP_011515432.1 [1234-1250]		1	1941	0.771	0.995444	101.6	93.4	150.3	3.99	4.98	11.59	28.3	3.04
	FALSE	High	[R].RQQEELLAEENQR.[L]	2.14242e-08	1.93435e-05	3	25	17	CAA91196.1; XP_005251037.1; XP_011515432.1	CAA91196.1 [2718-2730]; XP_005251037.1 [2586-2598]; XP_011515432.1 [2586-2598]		1	1642.81	0.731	0.00304235	41.4	134	172.6	23.87	22.89	69.33	73.63	8.11
	FALSE	High	[R].RQVEEEILALK.[A]	0.00519418	0.000557966	4	26	8	CAA91196.1; XP_005251037.1; EAW82172.1; XP_011515432.1	CAA91196.1 [2058-2068]; XP_005251037.1 [1926-1936]; EAW82172.1 [1948-1958]; XP_011515432.1 [1926-1936]		1	1327.76	0.749	0.610449	79.3	108	156.3	8.19		0.11	13.08	2.49
	FALSE	High	[R].RVVIVDPETGK.[E]	0.0958592	0.00709237	3	26	2	CAA91196.1; XP_005251037.1; XP_011515432.1	CAA91196.1 [4277-4287]; XP_005251037.1 [4145-4155]; XP_011515432.1 [4145-4155]		1	1212.69	0.769	6.09287e-17	24.6	144.1	150.3	14.46	14.61		10.7	12.47
	FALSE	High	[R].RYASGSSASLGGPESAVA.[-]	3.97243e-05	1.93435e-05	3	26	11	CAA91196.1; XP_005251037.1; XP_011515432.1	CAA91196.1 [4667-4684]; XP_005251037.1 [4535-4552]; XP_011515432.1 [4535-4552]		1	1666.8	0.825	0.80271	63.8	102.1	167.7	8.89	22.56	17.13	20.39	4.28
	FALSE	High	[R].SAEAELQSK.[R]	0.000422864	4.2772e-05	4	25	20	CAA91196.1; XP_005251037.1; EAW82172.1; XP_011515432.1	CAA91196.1 [1710-1718]; XP_005251037.1 [1578-1586]; EAW82172.1 [1600-1608]; XP_011515432.1 [1578-1586]		0	962.479	0.98	0.9741	108.1	96.8	99.6	7.89	15.14	11.57	34.58	10.44
	FALSE	High	[R].SDEGQLSPATR.[G]	2.50048e-06	1.93435e-05	4	26	29	CAA91196.1; XP_005251037.1; EAW82172.1; XP_011515432.1	CAA91196.1 [714-724]; XP_005251037.1 [582-592]; EAW82172.1 [604-614]; XP_011515432.1 [582-592]		0	1160.55	1.033	0.736595	130.5	87.1	100.7	11.97	11.57	3.79	8.37	6.08
	FALSE	High	[K].SEEMQTVQQEQLLQETQALQQSFLSEK.[D]	1.5892e-09	1.93435e-05	3	23	8	CAA91196.1; XP_005251037.1; XP_011515432.1	CAA91196.1 [2610-2636]; XP_005251037.1 [2478-2504]; XP_011515432.1 [2478-2504]		0	3180.54	0.01	0.917275	138.1	158.1	96		54.61	66.12	34.83	72.41
	FALSE	High	[K].SEEMQTVQQEQLLQETQALQQSFLSEK.[D]	2.23341e-10	1.93435e-05	3	23	11	CAA91196.1; XP_005251037.1; XP_011515432.1	CAA91196.1 [2610-2636]; XP_005251037.1 [2478-2504]; XP_011515432.1 [2478-2504]		0	3196.53	2.193	0.538685	160.7	49.4	53.8	9.75	36.6	32.26	49.37	77.92
	FALSE	High	[R].SELELTLGK.[L]	0.00163322	0.000154191	4	26	14	CAA91196.1; XP_005251037.1; EAW82172.1; XP_011515432.1	CAA91196.1 [1202-1210]; XP_005251037.1 [1070-1078]; EAW82172.1 [1092-1100]; XP_011515432.1 [1070-1078]		0	989.551	0.759	0.989372	105.1	117.8	106.2	7.54	7.6	12.61	26.43	6.52
	FALSE	High	[R].SKEQAELEAAR.[Q]	4.75922e-05	1.93435e-05	4	26	46	CAA91196.1; XP_005251037.1; EAW82172.1; XP_011515432.1	CAA91196.1 [2098-2108]; XP_005251037.1 [1966-1976]; EAW82172.1 [1988-1998]; XP_011515432.1 [1966-1976]		1	1231.63	0.772	0.945216	128.9	101.6	109.6	15.02	5.88	21.5	23.02	7.14
	FALSE	High	[K].SLAAEEEAAR.[Q]	0.000100918	1.93435e-05	4	26	44	CAA91196.1; XP_005251037.1; EAW82172.1; XP_011515432.1	CAA91196.1 [2130-2139]; XP_005251037.1 [1998-2007]; EAW82172.1 [2020-2029]; XP_011515432.1 [1998-2007]		0	1046.51	1.378	0.184936	159.1	66.7	75.6	25.52	20.28	9.06	12.09	5.93
	FALSE	High	[K].SLAQAEAEK.[Q]	0.0034393	0.000427246	4	25	14	CAA91196.1; XP_005251037.1; EAW82172.1; XP_011515432.1	CAA91196.1 [1793-1801]; XP_005251037.1 [1661-1669]; EAW82172.1 [1683-1691]; XP_011515432.1 [1661-1669]		0	946.484	1.176	0.840351	120.5	93.8	99.4	10.17	13.71	10.81	9.19	11.57
	FALSE	High	[R].SLESLHSFVAAATK.[E]	1.4305e-06	1.93435e-05	4	26	15	CAA91196.1; XP_005251037.1; EAW82172.1; XP_011515432.1	CAA91196.1 [751-764]; XP_005251037.1 [619-632]; EAW82172.1 [641-654]; XP_011515432.1 [619-632]		0	1460.77	0.776	0.996148	123.8	98.5	109.8	4.52	1.34	5.76	5.37	3.31
	FALSE	High	[K].SLLAWQSLR.[R]	0.00362755	0.000427246	4	26	8	CAA91196.1; XP_005251037.1; EAW82172.1; XP_011515432.1	CAA91196.1 [1029-1037]; XP_005251037.1 [897-905]; EAW82172.1 [919-927]; XP_011515432.1 [897-905]		0	1073.61	0.01	0.949166	127.7	102.3	110.4		5.7	9.79	25.73	10.07
	FALSE	High	[K].SIITYVSSLYDAMPR.[V]	1.18916e-08	1.93435e-05	4	26	4	CAA91196.1; XP_005251037.1; EAW82172.1; XP_011515432.1	CAA91196.1 [387-401]; XP_005251037.1 [255-269]; EAW82172.1 [277-291]; XP_011515432.1 [259-273]		0	1715.87	0.01	0.00483331	25	243.5	200.2			23.94	55.21	66.09
	FALSE	High	[K].SIITYVSSLYDAMPR.[V]	0.0683577	0.00506504	4	26	1	CAA91196.1; XP_005251037.1; EAW82172.1; XP_011515432.1	CAA91196.1 [387-401]; XP_005251037.1 [255-269]; EAW82172.1 [277-291]; XP_011515432.1 [259-273]		0	1731.86	0.223	6.09287e-17	161.7	158.6			6.78	20.32
	FALSE	High	[R].SIQEELQQLR.[Q]	6.30274e-05	1.93435e-05	4	25	20	CAA91196.1; XP_005251037.1; EAW82172.1; XP_011515432.1	CAA91196.1 [1554-1563]; XP_005251037.1 [1422-1431]; EAW82172.1 [1444-1453]; XP_011515432.1 [1422-1431]		0	1243.66	1.256	0.421322	139.9	74.3	84.7	18.27	4.19	3.24	10.18	5.99
	FALSE	High	[R].SLSAIYLEK.[L]	0.00431879	0.000483359	4	26	16	CAA91196.1; XP_005251037.1; EAW82172.1; XP_011515432.1	CAA91196.1 [1216-1224]; XP_005251037.1 [1084-1092]; EAW82172.1 [1106-1114]; XP_011515432.1 [1084-1092]		0	1023.57	0.979	0.789474	138.5	83.6	97.6	4.08	10.65	12.8	8.2	5.31
	FALSE	High	[R].SLVPAAELLESR.[V]	0.000107158	1.93435e-05	3	25	9	CAA91196.1; XP_005251037.1; XP_011515432.1	CAA91196.1 [3116-3127]; XP_005251037.1 [2984-2995]; XP_011515432.1 [2984-2995]		0	1284.72	0.996	0.296556	202.1	80.6		3.91	3.7	7.43	80.43
	FALSE	Medium	[K].SMIIDR.[R]	0.467158	0.0385561	3	26	11	CAA91196.1; XP_005251037.1; XP_011515432.1	CAA91196.1 [4329-4334]; XP_005251037.1 [4197-4202]; XP_011515432.1 [4197-4202]		0	734.387	1.012	0.908465	123.3	90.5	94.5	4.57	8.03	5.33	17.71	8.38
	FALSE	High	[R].SMVEEGTGLR.[L]	0.00164924	0.000154191	3	26	12	CAA91196.1; XP_005251037.1; XP_011515432.1	CAA91196.1 [4590-4599]; XP_005251037.1 [4458-4467]; XP_011515432.1 [4458-4467]		0	1078.52	0.657	0.973486	122.3	113.6	107.8	11.9	5.88	5.1	18.33	1.01
	FALSE	High	[R].SMVEEGTGLR.[L]	0.000271948	4.2772e-05	3	26	8	CAA91196.1; XP_005251037.1; XP_011515432.1	CAA91196.1 [4590-4599]; XP_005251037.1 [4458-4467]; XP_011515432.1 [4458-4467]		0	1094.51	100	6.09287e-17	108.1	116.5	74.7	34.58	16.92	22.03
	FALSE	High	[R].SNAEDTLR.[S]	0.011515	0.00104196	4	26	38	CAA91196.1; XP_005251037.1; EAW82172.1; XP_011515432.1	CAA91196.1 [2090-2097]; XP_005251037.1 [1958-1965]; EAW82172.1 [1980-1987]; XP_011515432.1 [1958-1965]		0	905.432	1.016	0.983939	108.7	100.8	103.2	15.64	9.07	12	16.55	27.35
	FALSE	Medium	[M].SQHQLR.[V]	0.309432	0.0220844	1	2	23	XP_005251037.1	XP_005251037.1 [2-7]	XP_005251037.1 1xAcetyl [N-Term]	0	810.422	0.609	0.865975	97.4	140.2	117.4	107.44	16.93	4.5	56.17	57.82
	FALSE	High	[R].SQVEEELFSVR.[V]	5.8808e-06	1.93435e-05	4	26	14	CAA91196.1; XP_005251037.1; EAW82172.1; XP_011515432.1	CAA91196.1 [2361-2371]; XP_005251037.1 [2229-2239]; EAW82172.1 [2251-2261]; XP_011515432.1 [2229-2239]		0	1322.66	1.008	0.608731	152	84.3	69.9	4.92	4.88	4.7	5.2	8.9
	FALSE	High	[R].SQVMDEATALQLR.[E]	1.47434e-06	1.93435e-05	3	26	11	CAA91196.1; XP_005251037.1; XP_011515432.1	CAA91196.1 [4037-4049]; XP_005251037.1 [3905-3917]; XP_011515432.1 [3905-3917]		0	1461.74	0.725	0.93681	131.4	100.5	99.9	3.75	6.18	7.54	12.11	8.14
	FALSE	High	[R].SQVMDEATALQLR.[E]	1.77798e-05	1.93435e-05	3	26	4	CAA91196.1; XP_005251037.1; XP_011515432.1	CAA91196.1 [4037-4049]; XP_005251037.1 [3905-3917]; XP_011515432.1 [3905-3917]		0	1477.73	0.01	0.888547	129.7	89.8	143.3		44.75	15.1	36.3	5.93
	FALSE	High	[R].SSIAGLLLK.[A]	0.000410479	4.2772e-05	3	25	14	CAA91196.1; XP_005251037.1; XP_011515432.1	CAA91196.1 [2833-2841]; XP_005251037.1 [2701-2709]; XP_011515432.1 [2701-2709]		0	901.572	0.653	0.974952	107.7	119.7	121.2	10.45	9.42	5.9	5.53	7.5
	FALSE	High	[R].SSSVGSSSSYPISPAVSR.[T]	6.99839e-10	1.93435e-05	3	26	10	CAA91196.1; XP_005251037.1; XP_011515432.1	CAA91196.1 [4384-4401]; XP_005251037.1 [4252-4269]; XP_011515432.1 [4252-4269]		0	1754.86	0.468	0.557367	164.7	75.7	109.7	51.36	9.09	14.87	23.02	12.36
	FALSE	High	[R].SYVDPSTDER.[L]	0.000194933	4.2772e-05	3	26	30	CAA91196.1; XP_005251037.1; XP_011515432.1	CAA91196.1 [3982-3991]; XP_005251037.1 [3850-3859]; XP_011515432.1 [3850-3859]		0	1168.51	1.048	0.798692	131.9	89.2	89	4.75	3.58	4.57	20.58	7.16
	FALSE	Medium	[K].TAQLER.[S]	0.317517	0.0227663	4	25	10	CAA91196.1; XP_005251037.1; EAW82172.1; XP_011515432.1	CAA91196.1 [1726-1731]; XP_005251037.1 [1594-1599]; EAW82172.1 [1616-1621]; XP_011515432.1 [1594-1599]		0	717.389	1.599	0.950306	99.6	77.5	81.6	15.08	37.27	6	0.27	12.25
	FALSE	High	[K].TEAEIALK.[E]	0.00230926	0.000195525	4	26	15	CAA91196.1; XP_005251037.1; EAW82172.1; XP_011515432.1	CAA91196.1 [1987-1994]; XP_005251037.1 [1855-1862]; EAW82172.1 [1877-1884]; XP_011515432.1 [1855-1862]		0	874.488	1.169	0.861997	126.3	82.5	62	18.28	6.89	2.89	26.21	7.1
	FALSE	High	[R].TELATQEK.[V]	0.00280538	0.000282962	4	25	22	CAA91196.1; XP_005251037.1; EAW82172.1; XP_011515432.1	CAA91196.1 [2557-2564]; XP_005251037.1 [2425-2432]; EAW82172.1 [2447-2454]; XP_011515432.1 [2425-2432]		0	919.473	0.816	0.9352	100.6	104.2	106.9	21.91	16.31	9.47	7.59	9.97
	FALSE	Medium	[R].TEYNLR.[L]	0.191162	0.0132291	4	26	27	CAA91196.1; XP_005251037.1; EAW82172.1; XP_011515432.1	CAA91196.1 [623-628]; XP_005251037.1 [491-496]; EAW82172.1 [513-518]; XP_011515432.1 [491-496]		0	795.4	0.877	0.971867	113.4	109.4	108.3	1.71	20	16.91	17.54	6.95
	FALSE	High	[R].THYSELTTLTSQYIK.[F]	3.85788e-11	1.93435e-05	4	26	13	CAA91196.1; XP_005251037.1; EAW82172.1; XP_011515432.1	CAA91196.1 [1458-1472]; XP_005251037.1 [1326-1340]; EAW82172.1 [1348-1362]; XP_011515432.1 [1326-1340]		0	1784.91	0.431	0.904661	122.7	140.7	97.3	7.75	1.7	7.63	25.87	3.62
	FALSE	High	[R].TLKPEEQR.[Q]	0.0267083	0.00211867	4	26	10	CAA91196.1; XP_005251037.1; EAW82172.1; XP_011515432.1	CAA91196.1 [1053-1060]; XP_005251037.1 [921-928]; EAW82172.1 [943-950]; XP_011515432.1 [921-928]		0	1000.54	0.253	0.0223282	54.7	162.5	183.9	22.43	34.74	14.23	50.73	26.83
	FALSE	High	[R].TLLQGSGCLAGIYLEDTK.[E]	1.54401e-11	1.93435e-05	3	25	8	CAA91196.1; XP_005251037.1; XP_011515432.1	CAA91196.1 [3486-3503]; XP_005251037.1 [3354-3371]; XP_011515432.1 [3354-3371]		0	1939.97	0.83	0.98585	120.7	113.2	92.4	6.13	11.47	8.29	14.34	21.97
	FALSE	High	[K].TISLVIR.[G]	0.0557143	0.00435497	4	26	15	CAA91196.1; XP_005251037.1; EAW82172.1; XP_011515432.1	CAA91196.1 [1227-1233]; XP_005251037.1 [1095-1101]; EAW82172.1 [1117-1123]; XP_011515432.1 [1095-1101]		0	801.519	1.138	0.578926	138.4	74.4	104.2	9.47	13.28	17.18	9.86	2.29
	FALSE	High	[K].TPVEVPVGGFK.[G]	4.76081e-06	1.93435e-05	3	25	16	CAA91196.1; XP_005251037.1; XP_011515432.1	CAA91196.1 [3374-3384]; XP_005251037.1 [3242-3252]; XP_011515432.1 [3242-3252]		0	1129.63	0.812	0.991475	108.9	109.7	115.6	6.9	5.49	8.2	7.58	1.71
	FALSE	High	[R].TQLASWSDPTEETGPVAGILDTETLEK.[V]	8.95835e-16	1.93435e-05	3	26	13	CAA91196.1; XP_005251037.1; XP_011515432.1	CAA91196.1 [4402-4428]; XP_005251037.1 [4270-4296]; XP_011515432.1 [4270-4296]		0	2888.4	0.782	0.984131	127.6	98.7	94.7	2.64	4.84	11.68	0.96	3.83
	FALSE	High	[K].TVTIWEIINSEYFTAEQR.[R]	3.25563e-13	1.93435e-05	3	25	3	CAA91196.1; XP_005251037.1; XP_011515432.1	CAA91196.1 [3058-3075]; XP_005251037.1 [2926-2943]; XP_011515432.1 [2926-2943]		0	2200.09	0.543	0.97628	128.9	122.4	117.2	16.72	42.01	4.05	10.31	70.17
	FALSE	High	[R].TVTVWELISSEYFTAEQR.[Q]	6.10632e-13	1.93435e-05	3	25	3	CAA91196.1; XP_005251037.1; XP_011515432.1	CAA91196.1 [3387-3404]; XP_005251037.1 [3255-3272]; XP_011515432.1 [3255-3272]		0	2159.07	0.219	0.846287	125.7	142.8	95.6	51.63	27.15	13.87	24.89	48.74
	FALSE	Medium	[R].VAEMSR.[A]	0.470449	0.038896	4	25	6	CAA91196.1; XP_005251037.1; EAW82172.1; XP_011515432.1	CAA91196.1 [2526-2531]; XP_005251037.1 [2394-2399]; EAW82172.1 [2416-2421]; XP_011515432.1 [2394-2399]		0	692.34	0.683	0.944112	108.8	122.1	94	16.29	33.65	19.14	23.53	26.12
	FALSE	High	[R].VAQLLER.[W]	0.0202135	0.00164369	4	25	48	CAA91196.1; XP_005251037.1; EAW82172.1; XP_011515432.1	CAA91196.1 [1318-1324]; XP_005251037.1 [1186-1192]; EAW82172.1 [1208-1214]; XP_011515432.1 [1186-1192]		0	828.494	1.127	0.569373	147.1	83.6	80.4	12.08	3.68	0.56	7.85	4.51
	FALSE	High	[R].VDGAEWGVDLPSVEAQLGSHR.[G]	1.4675e-14	1.93435e-05	4	26	2	CAA91196.1; XP_005251037.1; EAW82172.1; XP_011515432.1	CAA91196.1 [676-696]; XP_005251037.1 [544-564]; EAW82172.1 [566-586]; XP_011515432.1 [544-564]		0	2222.08
	FALSE	Medium	[R].VKAEAEAAR.[E]	0.491925	0.0415308	4	24	1	CAA91196.1; XP_005251037.1; EAW82172.1; XP_011515432.1	CAA91196.1 [1658-1666]; XP_005251037.1 [1526-1534]; EAW82172.1 [1548-1556]; XP_011515432.1 [1526-1534]		1	944.516		6.09287e-17	151.7		217.6			8.5		34.12
	FALSE	High	[R].VLADPSDDTK.[G]	2.39175e-05	1.93435e-05	4	34	36	CAA91196.1; XP_005251037.1; XP_016869381.1; XP_011515432.1	CAA91196.1 [2979-2988]; [3638-3647]; XP_005251037.1 [2847-2856]; [3506-3515]; XP_016869381.1 [2408-2417]; [2944-2953]; [3475-3484]; [4009-4018]; XP_011515432.1 [2847-2856]; [3506-3515]		0	1060.52	0.991	0.785899	141.1	103.7	86.8	19.18	2.07	23.72	13.85	15.03
	FALSE	High	[K].VLALPEPSPAAPTLR.[S]	2.09304e-07	1.93435e-05	4	26	14	CAA91196.1; XP_005251037.1; EAW82172.1; XP_011515432.1	CAA91196.1 [1187-1201]; XP_005251037.1 [1055-1069]; EAW82172.1 [1077-1091]; XP_011515432.1 [1055-1069]		0	1531.88	0.858	0.881337	119.4	103.3	102.6	7.93	2.33	3.06	5.76	2.09
	FALSE	High	[K].VLSSSGSEAAVPSVCFLVPPPNQEAQEAVTR.[L]	5.47656e-12	1.93435e-05	3	25	8	XP_005251037.1; EAW82172.1; XP_011515432.1	XP_005251037.1 [846-876]; EAW82172.1 [868-898]; XP_011515432.1 [846-876]		0	3227.59	0.663	0.987931	116.9	109.2	103.3	21.27	40.17	25.98	2.04	14.37
	FALSE	High	[R].VPDVQDGVR.[A]	0.00237775	0.000195525	3	25	20	CAA91196.1; XP_005251037.1; EAW82172.1	CAA91196.1 [402-410]; XP_005251037.1 [270-278]; EAW82172.1 [292-300]		0	984.511	0.867	0.945551	108	115.9	104.4	24.66	2.28	13.27	18.43	10.47
	FALSE	High	[R].VPLDEALQR.[G]	0.000187328	4.2772e-05	3	26	23	CAA91196.1; XP_005251037.1; XP_011515432.1	CAA91196.1 [4543-4551]; XP_005251037.1 [4411-4419]; XP_011515432.1 [4411-4419]		0	1040.57	0.993	0.699955	140	92.9	75.1	3.92	1.92	12.02	2.21	7.09
	FALSE	High	[R].VPLDVACAR.[G]	0.000663078	9.10162e-05	3	25	15	CAA91196.1; XP_005251037.1; XP_011515432.1	CAA91196.1 [3289-3297]; XP_005251037.1 [3157-3165]; XP_011515432.1 [3157-3165]		0	1001.51	0.851	0.919023	129.4	94.3	100.3	0.37	1.98	9.82	5.02	5.64
	FALSE	High	[K].VPPGYHPLDVEK.[E]	9.51697e-07	1.93435e-05	4	26	31	CAA91196.1; XP_005251037.1; EAW82172.1; XP_011515432.1	CAA91196.1 [494-505]; XP_005251037.1 [362-373]; EAW82172.1 [384-395]; XP_011515432.1 [362-373]		0	1350.71	0.885	0.936583	128.9	98	86.2	5.19	16.61	17.97	3.37	1.99
	FALSE	High	[K].VPPGYHPLDVEKEWGK.[L]	0.0086758	0.000802402	4	26	2	CAA91196.1; XP_005251037.1; EAW82172.1; XP_011515432.1	CAA91196.1 [494-509]; XP_005251037.1 [362-377]; EAW82172.1 [384-399]; XP_011515432.1 [362-377]		1	1850.94	0.083	0.0983898	38.7	148.2	270.3	41.23	11.81	7.55	43.07	3.98
	FALSE	High	[R].VPQPEGLGR.[K]	0.0010676	0.000154191	1	2	26	XP_005251037.1	XP_005251037.1 [8-16]		0	952.521	1.075	0.835345	129.6	86.6	97.7	6.16	1.52	2.97	20.3	7.53
	FALSE	High	[R].VPVDVAYQR.[G]	0.000193966	4.2772e-05	4	29	31	CAA91196.1; XP_005251037.1; XP_016869381.1; XP_011515432.1	CAA91196.1 [3620-3628]; XP_005251037.1 [3488-3496]; XP_016869381.1 [2926-2934]; XP_011515432.1 [3488-3496]		0	1046.56	0.816	0.858386	131.8	92.2	107.6	4.34	7.6	22.75	25.62	6.94
	FALSE	High	[R].VPVDVAYR.[RC]	0.00425643	0.000483359	4	34	27	CAA91196.1; XP_005251037.1; XP_016869381.1; XP_011515432.1	CAA91196.1 [2961-2968]; XP_005251037.1 [2829-2836]; XP_016869381.1 [771-778]; [1732-1739]; [2390-2397]; [3457-3464]; [3991-3998]; XP_011515432.1 [2829-2836]		0	918.504	0.609	0.800817	115.2	103.6	118.2	18.01	14.13	25.18	19.97	6.92
	FALSE	High	[R].VQMEELSK.[L]	0.00548025	0.000596903	4	26	25	CAA91196.1; XP_005251037.1; EAW82172.1; XP_011515432.1	CAA91196.1 [2372-2379]; XP_005251037.1 [2240-2247]; EAW82172.1 [2262-2269]; XP_011515432.1 [2240-2247]		0	963.482	1.065	0.861381	120	83.7	113.8	13.55	2.44	1.95	8.58	11.55
	FALSE	Medium	[R].VQMEELSK.[L]	0.214532	0.0149056	4	26	1	CAA91196.1; XP_005251037.1; EAW82172.1; XP_011515432.1	CAA91196.1 [2372-2379]; XP_005251037.1 [2240-2247]; EAW82172.1 [2262-2269]; XP_011515432.1 [2240-2247]		0	979.476	2.033	0.987104	147.8	130.3	76.8	64.75	41.39	25.65	118.7	28.59
	FALSE	High	[K].VQSGSESVIQEYVDLR.[T]	5.96561e-12	1.93435e-05	4	26	15	CAA91196.1; XP_005251037.1; EAW82172.1; XP_011515432.1	CAA91196.1 [1442-1457]; XP_005251037.1 [1310-1325]; EAW82172.1 [1332-1347]; XP_011515432.1 [1310-1325]		0	1808.9	0.782	0.99908	119.4	109.6	98.4	3.7	7.76	6.33	4.54	4.98
	FALSE	High	[K].VSITEAMHR.[N]	3.05942e-05	1.93435e-05	3	26	34	CAA91196.1; XP_005251037.1; XP_011515432.1	CAA91196.1 [4429-4437]; XP_005251037.1 [4297-4305]; XP_011515432.1 [4297-4305]		0	1043.53	0.68	0.973865	112.9	113.6	121.8	4.23	8.82	0.77	18.3	12.46
	FALSE	High	[K].VSIYEAMR.[R]	0.00411446	0.000483359	3	25	21	CAA91196.1; XP_005251037.1; XP_011515432.1	CAA91196.1 [3506-3513]; XP_005251037.1 [3374-3381]; XP_011515432.1 [3374-3381]		0	968.487	0.761	0.984404	109.2	109.8	109.5	2.29	3.86	4.24	9.55	3.8
	FALSE	High	[K].VSIYEAMR.[R]	0.0863166	0.00651117	3	25	1	CAA91196.1; XP_005251037.1; XP_011515432.1	CAA91196.1 [3506-3513]; XP_005251037.1 [3374-3381]; XP_011515432.1 [3374-3381]		0	984.482	100	6.09287e-17	149.5		125.8		102.58	60.01
	FALSE	High	[K].VTLVQTLEIQR.[Q]	3.6466e-06	1.93435e-05	4	25	12	CAA91196.1; XP_005251037.1; EAW82172.1; XP_011515432.1	CAA91196.1 [2565-2575]; XP_005251037.1 [2433-2443]; EAW82172.1 [2455-2465]; XP_011515432.1 [2433-2443]		0	1299.76	0.663	1	121.8	117.5	99.9	3.34	4.7	2.39	4.91	7.98
	FALSE	High	[R].VVIVDPETGK.[E]	7.81828e-05	1.93435e-05	3	26	30	CAA91196.1; XP_005251037.1; XP_011515432.1	CAA91196.1 [4278-4287]; XP_005251037.1 [4146-4155]; XP_011515432.1 [4146-4155]		0	1056.59	1.053	0.898663	137.8	93.8	58.7	14.22	6.02	16.26	10.53	2.85
	FALSE	High	[R].VVIVDPETGKEMSVYEAYR.[K]	2.42064e-10	1.93435e-05	3	26	2	CAA91196.1; XP_005251037.1; XP_011515432.1	CAA91196.1 [4278-4296]; XP_005251037.1 [4146-4164]; XP_011515432.1 [4146-4164]		1	2185.08	0.943	1	176.7	91.4	145.8					156.45
	FALSE	High	[R].WQAVLAQTDVR.[Q]	3.68422e-05	1.93435e-05	4	25	14	CAA91196.1; XP_005251037.1; EAW82172.1; XP_011515432.1	CAA91196.1 [1325-1335]; XP_005251037.1 [1193-1203]; EAW82172.1 [1215-1225]; XP_011515432.1 [1193-1203]		0	1286.69	0.697	0.888717	143	89.8	123.1	0.77	8.33	6.7	14.47	2.97
	FALSE	High	[R].YASGSSASLGGPESAVA.[-]	0.00207444	0.000195525	3	26	5	CAA91196.1; XP_005251037.1; XP_011515432.1	CAA91196.1 [4668-4684]; XP_005251037.1 [4536-4552]; XP_011515432.1 [4536-4552]		0	1510.7	0.726	0.973883	113.7	127.1	104.8	16.17	16.2	5.14	4.88	13.57
	FALSE	High	[R].YLQDLLAWVEENQHR.[V]	5.84675e-12	1.93435e-05	4	26	13	CAA91196.1; XP_005251037.1; EAW82172.1; XP_011515432.1	CAA91196.1 [661-675]; XP_005251037.1 [529-543]; EAW82172.1 [551-565]; XP_011515432.1 [529-543]		0	1913.95	0.762	0.990868	113.9	106.1	116.9	12.06	2.75	8.85	4.76	6.77
	FALSE	Medium	[K].YLTCPK.[T]	0.19777	0.0137559	3	26	2	CAA91196.1; XP_005251037.1; XP_011515432.1	CAA91196.1 [4571-4576]; XP_005251037.1 [4439-4444]; XP_011515432.1 [4439-4444]		0	782.375	0.909	0.939579	117.4	102.6	101.7	19.26	10.48	12.84	19.54	4.57
FALSE	High	Master Protein	XP_011515432.1	0	2620.68	67	305	5626	1	4552	516.4	5.76	87274	305	PLEC	0.01	0.573	0.773	0.887	1.29458e-16	0.236748	0.801255	0.93673
	Checked	Confidence	Annotated Sequence	Qvality PEP	Qvality q-value	# Protein Groups	# Proteins	# PSMs	Master Protein Accessions	Positions in Master Proteins	Modifications in Master Proteins	# Missed Cleavages	Theo. MH+ [Da]	Abundance Ratio: (5000uM 24h) / (50uM 24h)	Abundance Ratio Adj. P-Value: (5000uM 6Days) / (50uM 24h)	Abundances (Grouped): 5000uM 6Days	Abundances (Grouped): 50uM 24h	Abundances (Grouped): 50uM 48h	Abundances (Grouped) CV [%]: 5000uM 24h	Abundances (Grouped) CV [%]: 5000uM 48h	Abundances (Grouped) CV [%]: 5000uM 6Days	Abundances (Grouped) CV [%]: 50uM 24h	Abundances (Grouped) CV [%]: 50uM 48h
	FALSE	High	[R].AAEEAEEAR.[V]	0.000480964	4.2772e-05	4	26	72	CAA91196.1; XP_005251037.1; EAW82172.1; XP_011515432.1	CAA91196.1 [2226-2234]; XP_005251037.1 [2094-2102]; EAW82172.1 [2116-2124]; XP_011515432.1 [2094-2102]		0	975.438	0.894	0.828213	126.5	84.7	134.8	33.95	47.89	14.63	14.82	19.32
	FALSE	High	[R].AALAHSEEVTASQVAATK.[T]	1.96117e-15	1.93435e-05	3	25	27	CAA91196.1; XP_005251037.1; XP_011515432.1	CAA91196.1 [2744-2761]; XP_005251037.1 [2612-2629]; XP_011515432.1 [2612-2629]		0	1783.92	1.073	0.587235	144.6	81.3	79.5	7.65	7.75	19.6	5.44	5.68
	FALSE	High	[K].AALEEVER.[L]	0.00561564	0.000596903	4	26	9	CAA91196.1; XP_005251037.1; EAW82172.1; XP_011515432.1	CAA91196.1 [2143-2150]; XP_005251037.1 [2011-2018]; EAW82172.1 [2033-2040]; XP_011515432.1 [2011-2018]		0	916.473	1.046	0.849901	133.3	92.9	82.7	9.35	4.31	5.74	1.22	4.32
	FALSE	Medium	[K].ADSMIR.[L]	0.396533	0.0308312	4	26	19	CAA91196.1; XP_005251037.1; EAW82172.1; XP_011515432.1	CAA91196.1 [582-587]; XP_005251037.1 [450-455]; EAW82172.1 [472-477]; XP_011515432.1 [450-455]		0	692.34	0.775	0.964939	96.8	107	92.3	42.19	24.87	25.42	22.94	7.59
	FALSE	High	[K].AEAELLQQQK.[E]	4.61805e-05	1.93435e-05	4	25	13	CAA91196.1; XP_005251037.1; EAW82172.1; XP_011515432.1	CAA91196.1 [2464-2473]; XP_005251037.1 [2332-2341]; EAW82172.1 [2354-2363]; XP_011515432.1 [2332-2341]		0	1157.62	1.331	0.945058	108.1	83.5	77.6	33.76	8.96	5.56	27.82	3.97
	FALSE	High	[K].AELELELGR.[I]	0.00193751	0.000154191	4	26	21	CAA91196.1; XP_005251037.1; EAW82172.1; XP_011515432.1	CAA91196.1 [2079-2087]; XP_005251037.1 [1947-1955]; EAW82172.1 [1969-1977]; XP_011515432.1 [1947-1955]		0	1029.56	0.627	0.979691	127.7	110.3	110.7	6.41	11.79	3.89	20.29	1.24
	FALSE	High	[R].AEMEVLLASK.[A]	0.000439957	4.2772e-05	4	26	6	CAA91196.1; XP_005251037.1; EAW82172.1; XP_011515432.1	CAA91196.1 [1899-1908]; XP_005251037.1 [1767-1776]; EAW82172.1 [1789-1798]; XP_011515432.1 [1767-1776]		0	1090.58	0.579	0.912412	142.4	107.2	83.6	15.63	2.38	10.27	19.12	1.82
	FALSE	High	[K].AEVVETTQVYTEEETR.[R]	9.19557e-12	1.93435e-05	2	25	30	XP_005251037.1; XP_011515432.1	XP_005251037.1 [3554-3569]; XP_011515432.1 [3554-3569]		0	1883.89	1.146	0.734343	128.9	63.9	58.1	25.05	7.06	21.17	33.39	8.27
	FALSE	High	[K].AEVVETTQVYTEEETRR.[A]	3.9127e-06	1.93435e-05	2	25	6	XP_005251037.1; XP_011515432.1	XP_005251037.1 [3554-3570]; XP_011515432.1 [3554-3570]		1	2039.99	0.215	0.0952316	72.2	162.1	189.2	21.87	7.82	16.54	33.51	9.45
	FALSE	High	[K].AFCGFEDPR.[T]	0.00754448	0.000738505	3	26	9	CAA91196.1; XP_005251037.1; XP_011515432.1	CAA91196.1 [4492-4500]; XP_005251037.1 [4360-4368]; XP_011515432.1 [4360-4368]		0	1099.45	0.852	0.945557	99.5	110.2	113.5	19.37	14.34	3.82	0.97	7.46
	FALSE	High	[R].AGLVGPEFHEK.[L]	4.76081e-06	1.93435e-05	3	25	31	CAA91196.1; XP_005251037.1; XP_011515432.1	CAA91196.1 [3221-3231]; XP_005251037.1 [3089-3099]; XP_011515432.1 [3089-3099]		0	1183.61	1.048	0.902229	110.4	90.5	95.9	16.12	5.48	31.84	10.55	25.64
	FALSE	High	[R].AGTLSITEFADMLSGNAGGFR.[S]	6.80849e-14	1.93435e-05	3	26	6	CAA91196.1; XP_005251037.1; XP_011515432.1	CAA91196.1 [4361-4381]; XP_005251037.1 [4229-4249]; XP_011515432.1 [4229-4249]		0	2115.02	0.468	0.719368	78	125.4	158.8	6.13	54.73	49.97	52.58	17.42
	FALSE	High	[R].AGTLSITEFADMLSGNAGGFR.[S]	2.07383e-12	1.93435e-05	3	26	9	CAA91196.1; XP_005251037.1; XP_011515432.1	CAA91196.1 [4361-4381]; XP_005251037.1 [4229-4249]; XP_011515432.1 [4229-4249]		0	2131.01	8.319	0.0315582	95.1	16.6	148.8	3.78	31.88	42.14	107.32	50.99
	FALSE	High	[K].AGVAAPATQVAQVTLQSVQR.[R]	2.41294e-09	1.93435e-05	3	24	15	CAA91196.1; XP_005251037.1; XP_011515432.1	CAA91196.1 [631-650]; XP_005251037.1 [499-518]; XP_011515432.1 [499-518]		0	1995.1	0.534	0.960562	121.6	110.5	130.2	13.74	17.34	23.99	26.77	28.13
	FALSE	High	[K].AGVVGPELHEQLLSAEK.[A]	2.39519e-13	1.93435e-05	3	25	23	CAA91196.1; XP_005251037.1; XP_011515432.1	CAA91196.1 [3552-3568]; XP_005251037.1 [3420-3436]; XP_011515432.1 [3420-3436]		0	1776.95	1.296	0.860423	120.7	76.2	95.9	13.48	9.24	21.7	35.72	18.71
	FALSE	High	[K].AHAFAVQQK.[E]	0.000453225	4.2772e-05	4	26	8	CAA91196.1; XP_005251037.1; EAW82172.1; XP_011515432.1	CAA91196.1 [2190-2198]; XP_005251037.1 [2058-2066]; EAW82172.1 [2080-2088]; XP_011515432.1 [2058-2066]		0	999.537	0.886	0.931953	94.3	105.1	123	8.63	23.02	9.48	14.16	10.35
	FALSE	High	[K].AKLEQLFQDEVAK.[A]	4.04405e-10	1.93435e-05	3	25	14	CAA91196.1; XP_005251037.1; XP_011515432.1	CAA91196.1 [2651-2663]; XP_005251037.1 [2519-2531]; XP_011515432.1 [2519-2531]		1	1518.82	0.542	0.996148	108.4	100.3	148.7	22.71	9.17	7.39	13.3	9.62
	FALSE	High	[R].ALAEEAK.[R]	0.114749	0.00835447	4	26	9	CAA91196.1; XP_005251037.1; EAW82172.1; XP_011515432.1	CAA91196.1 [1945-1951]; XP_005251037.1 [1813-1819]; EAW82172.1 [1835-1841]; XP_011515432.1 [1813-1819]		0	731.393	0.724	0.905657	113.5	123.6	62.3	18.28	12.56	11.71	44.5	8.57
	FALSE	High	[R].ALQALEELR.[L]	0.00140375	0.000154191	4	25	23	CAA91196.1; XP_005251037.1; EAW82172.1; XP_011515432.1	CAA91196.1 [1671-1679]; XP_005251037.1 [1539-1547]; EAW82172.1 [1561-1569]; XP_011515432.1 [1539-1547]		0	1042.59	0.854	0.978468	115.8	107.1	99.3	20.55	16.83	5.5	11.64	9.7
	FALSE	High	[R].APVPASELLASGVLSR.[A]	3.10889e-08	1.93435e-05	2	24	1	XP_005251037.1; XP_011515432.1	XP_005251037.1 [3315-3330]; XP_011515432.1 [3315-3330]		0	1566.88	0.701	0.71028	82.6	127.1	133.1	9.14	9.43	8.3	19.21	5.58
	FALSE	High	[R].AQAEAQQPTFDALR.[D]	5.00489e-09	1.93435e-05	4	26	22	CAA91196.1; XP_005251037.1; EAW82172.1; XP_011515432.1	CAA91196.1 [1274-1287]; XP_005251037.1 [1142-1155]; EAW82172.1 [1164-1177]; XP_011515432.1 [1142-1155]		0	1545.77	1.375	0.981655	106.8	102.7	57.4	13.16	5.86	10.09	19.5	5.05
	FALSE	High	[R].AQAEAQQPTFDALRDELR.[G]	6.24671e-06	1.93435e-05	4	26	11	CAA91196.1; XP_005251037.1; EAW82172.1; XP_011515432.1	CAA91196.1 [1274-1291]; XP_005251037.1 [1142-1159]; EAW82172.1 [1164-1181]; XP_011515432.1 [1142-1159]		1	2059.02	0.244	0.250945	68.8	129.1	230.9	7.07	18.54	5.91	35.28	1.69
	FALSE	High	[R].AQAEQAALR.[Q]	0.00368065	0.000427246	4	26	12	CAA91196.1; XP_005251037.1; EAW82172.1; XP_011515432.1	CAA91196.1 [2287-2295]; XP_005251037.1 [2155-2163]; EAW82172.1 [2177-2185]; XP_011515432.1 [2155-2163]		0	957.511	100	6.09287e-17	214.4			12.06	6.01	16.94
	FALSE	High	[K].AQAEVEGLGK.[G]	0.000703458	9.10162e-05	4	26	30	CAA91196.1; XP_005251037.1; EAW82172.1; XP_011515432.1	CAA91196.1 [1166-1175]; XP_005251037.1 [1034-1043]; EAW82172.1 [1056-1065]; XP_011515432.1 [1034-1043]		0	1001.53	0.98	0.978144	116.4	97.9	102.8	4.64	4.35	9.07	4.7	3.18
	FALSE	Medium	[R].AQFEQLK.[D]	0.172327	0.0120386	3	25	16	CAA91196.1; XP_005251037.1; XP_011515432.1	CAA91196.1 [3463-3469]; XP_005251037.1 [3331-3337]; XP_011515432.1 [3331-3337]		0	863.462	0.911	0.95256	111.3	96.6	107.8	11.98	8.37	7.84	3.69	5.73
	FALSE	High	[R].AQFEQLKDGK.[T]	0.139689	0.00997024	3	25	1	CAA91196.1; XP_005251037.1; XP_011515432.1	CAA91196.1 [3463-3472]; XP_005251037.1 [3331-3340]; XP_011515432.1 [3331-3340]		1	1163.61
	FALSE	High	[K].AQLEPVASPAK.[K]	9.55152e-05	1.93435e-05	4	26	31	CAA91196.1; XP_005251037.1; EAW82172.1; XP_011515432.1	CAA91196.1 [1428-1438]; XP_005251037.1 [1296-1306]; EAW82172.1 [1318-1328]; XP_011515432.1 [1296-1306]		0	1110.62	1.062	0.676377	139.9	87.8	102.9	13.91	1.02	3.45	10.07	6.03
	FALSE	High	[R].AQLMADFQAGR.[V]	6.11595e-05	1.93435e-05	3	26	14	CAA91196.1; XP_005251037.1; XP_011515432.1	CAA91196.1 [3739-3749]; XP_005251037.1 [3607-3617]; XP_011515432.1 [3607-3617]		0	1207.59	0.553	0.925519	125.6	119.5	99.8	20.39	31.06	25.31	12.83	12.98
	FALSE	High	[R].AQLMADFQAGR.[V]	0.0001155	1.93435e-05	3	26	18	CAA91196.1; XP_005251037.1; XP_011515432.1	CAA91196.1 [3739-3749]; XP_005251037.1 [3607-3617]; XP_011515432.1 [3607-3617]		0	1223.58	1.158	0.472006	146	78.6	97.5	22.18	61.32	36.63	49.09	70.57
	FALSE	High	[K].AQVEQELTTLR.[L]	2.56608e-05	1.93435e-05	4	26	18	CAA91196.1; XP_005251037.1; EAW82172.1; XP_011515432.1	CAA91196.1 [2319-2329]; XP_005251037.1 [2187-2197]; EAW82172.1 [2209-2219]; XP_011515432.1 [2187-2197]		0	1287.69	0.809	0.967572	124.3	105.4	92.5	2.87	5.22	5.42	33.85	3.8
	FALSE	High	[R].ARQEELYSELQAR.[E]	9.01806e-06	1.93435e-05	2	24	8	XP_005251037.1; XP_011515432.1	XP_005251037.1 [3224-3236]; XP_011515432.1 [3224-3236]		1	1592.8	0.502	0.815519	70.7	77.8	265.4	48.47	18.7	10.86	53.08	9.29
	FALSE	High	[K].ASDSELER.[Q]	0.0164146	0.00142738	4	26	38	CAA91196.1; XP_005251037.1; EAW82172.1; XP_011515432.1	CAA91196.1 [2038-2045]; XP_005251037.1 [1906-1913]; EAW82172.1 [1928-1935]; XP_011515432.1 [1906-1913]		0	906.416	0.829	0.333822	72.5	130.8	78.4	13.42	24.58	7.86	14.2	20.82
	FALSE	High	[R].ATTAALLLEAQAATGFLVDPVR.[N]	1.37091e-10	1.93435e-05	2	24	6	XP_005251037.1; XP_011515432.1	XP_005251037.1 [3387-3408]; XP_011515432.1 [3387-3408]		0	2228.23	1.03	0.743242	68.9	117.6	102.1	7.55	3.53	8.67	5.55	8.07
	FALSE	High	[K].ATVSAPFGK.[F]	0.0107783	0.000970585	3	25	34	CAA91196.1; XP_005251037.1; XP_011515432.1	CAA91196.1 [3045-3053]; XP_005251037.1 [2913-2921]; XP_011515432.1 [2913-2921]		0	877.478	0.79	0.891157	103.8	110.8	120.5	2.65	6.26	4.58	4.82	7.79
	FALSE	High	[R].AVTGYKDPYSGK.[L]	3.99242e-05	1.93435e-05	3	26	8	CAA91196.1; XP_005251037.1; XP_011515432.1	CAA91196.1 [4147-4158]; XP_005251037.1 [4015-4026]; XP_011515432.1 [4015-4026]		1	1285.64	2.693	0.988236	79.2	42.4	167.4	0.7		15.48	74	6.25
	FALSE	High	[R].AVTGYKDPYTGQQISLFQAMQK.[G]	3.50276e-06	1.93435e-05	3	25	1	CAA91196.1; XP_005251037.1; XP_011515432.1	CAA91196.1 [2910-2931]; XP_005251037.1 [2778-2799]; XP_011515432.1 [2778-2799]		1	2474.24
	FALSE	High	[K].AVVQLKPR.[H]	0.0010887	0.000154191	4	26	36	CAA91196.1; XP_005251037.1; EAW82172.1; XP_011515432.1	CAA91196.1 [927-934]; XP_005251037.1 [795-802]; EAW82172.1 [817-824]; XP_011515432.1 [795-802]		0	910.583	0.822	0.868553	96.4	128.1	117.1	12.83	3.61	6.85	31.89	20.56
	FALSE	High	[K].AYSDPSTGEPATYGELQQR.[C]	1.02918e-15	1.93435e-05	3	25	17	CAA91196.1; XP_005251037.1; XP_011515432.1	CAA91196.1 [3317-3335]; XP_005251037.1 [3185-3203]; XP_011515432.1 [3185-3203]		0	2069.94	0.944	0.888895	129.9	87.4	85.2	15.67	7.31	6.51	12.68	13.86
	FALSE	High	[R].CDNFTSSWR.[D]	0.000772392	9.10162e-05	4	26	24	CAA91196.1; XP_005251037.1; EAW82172.1; XP_011515432.1	CAA91196.1 [317-325]; XP_005251037.1 [185-193]; EAW82172.1 [207-215]; XP_011515432.1 [189-197]		0	1173.46	0.882	0.987247	104.3	105.1	109.6	6.67	3	5.78	9.37	6.1
	FALSE	High	[R].CITDPQTGLCLLPLK.[E]	1.48036e-12	1.93435e-05	3	26	6	CAA91196.1; XP_005251037.1; XP_011515432.1	CAA91196.1 [4245-4259]; XP_005251037.1 [4113-4127]; XP_011515432.1 [4113-4127]		0	1730.87	0.858	1	114.2	108.9	95.8	4.96	6.19	7.75	8.93	9.16
	FALSE	High	[R].CRPDQLTGLSLLPLSEK.[A]	1.54686e-10	1.93435e-05	3	25	2	CAA91196.1; XP_005251037.1; XP_011515432.1	CAA91196.1 [3336-3352]; XP_005251037.1 [3204-3220]; XP_011515432.1 [3204-3220]		0	1928.02	0.01	6.09287e-17		241.7	258.3				22.11	10.14
	FALSE	High	[R].CVEDPETGLCLLPLTDK.[A]	1.75891e-14	1.93435e-05	3	25	15	CAA91196.1; XP_005251037.1; XP_011515432.1	CAA91196.1 [3008-3024]; XP_005251037.1 [2876-2892]; XP_011515432.1 [2876-2892]		0	1961.91	1.156	0.870667	135.6	83.5	50.4	11.79	4.51	1.62	7.38	5.58
	FALSE	High	[R].CVEDPETGLR.[L]	1.17725e-05	1.93435e-05	3	26	47	CAA91196.1; XP_005251037.1; XP_011515432.1	CAA91196.1 [3667-3676]; XP_005251037.1 [3535-3544]; XP_011515432.1 [3535-3544]		0	1176.52	0.953	0.97981	113.3	96	88.9	15.38	8.42	3.06	6.62	4.33
	FALSE	High	[R].DALDGPAAEAEPEHSFDGLR.[R]	7.4915e-14	1.93435e-05	3	25	21	CAA91196.1; XP_005251037.1; XP_011515432.1	CAA91196.1 [2768-2787]; XP_005251037.1 [2636-2655]; XP_011515432.1 [2636-2655]		0	2096.95	0.904	0.875768	118	99.1	101.9	7.22	2.27	2.68	6.01	5.2
	FALSE	High	[R].DDGTGQLLLPLSDAR.[K]	7.23955e-08	1.93435e-05	2	25	6	XP_005251037.1; XP_011515432.1	XP_005251037.1 [3872-3886]; XP_011515432.1 [3872-3886]		0	1570.81	0.01	6.09287e-17	191.8	123	17.1		4.57	6.8		129.83
	FALSE	High	[R].DGHNLISLLEVLSGDSLPR.[E]	2.25902e-12	1.93435e-05	4	26	10	CAA91196.1; XP_005251037.1; EAW82172.1; XP_011515432.1	CAA91196.1 [209-227]; XP_005251037.1 [77-95]; EAW82172.1 [99-117]; XP_011515432.1 [81-99]		0	2035.08	1.12	0.983301	115.8	91.8	62.2	25.84	21.78	9.78	7.26	32.31
	FALSE	High	[R].DLDKADSMIR.[L]	0.114131	0.00832698	4	26	5	CAA91196.1; XP_005251037.1; EAW82172.1; XP_011515432.1	CAA91196.1 [578-587]; XP_005251037.1 [446-455]; EAW82172.1 [468-477]; XP_011515432.1 [446-455]		1	1163.57	0.01	0.913506	67.6	94.2	338.2			14.67	67.91	6.41
	FALSE	High	[K].DLLPSDMAVALLEAQAGTGHIIDPATSAR.[L]	2.82718e-16	1.93435e-05	3	25	13	CAA91196.1; XP_005251037.1; XP_011515432.1	CAA91196.1 [3184-3212]; XP_005251037.1 [3052-3080]; XP_011515432.1 [3052-3080]		0	2933.5	0.293	0.919353	137.4	155.5	83.8	39.67	13.97	65	45.58	20
	FALSE	High	[K].DLLPSDMAVALLEAQAGTGHIIDPATSAR.[L]	6.16892e-16	1.93435e-05	3	25	15	CAA91196.1; XP_005251037.1; XP_011515432.1	CAA91196.1 [3184-3212]; XP_005251037.1 [3052-3080]; XP_011515432.1 [3052-3080]		0	2949.5	2.899	0.119129	159.1	40.5	53.9	18.46	29.49	35.7	64.74	47.75
	FALSE	High	[K].DLSELGSVR.[T]	0.00213603	0.000195525	3	25	13	CAA91196.1; XP_005251037.1; XP_011515432.1	CAA91196.1 [3477-3485]; XP_005251037.1 [3345-3353]; XP_011515432.1 [3345-3353]		0	975.511	0.873	0.799593	126.7	87.1	94.2	16.62	2.98	4.18	9.41	12.7
	FALSE	High	[R].DPYTGQSVSLFQALK.[K]	2.21215e-07	1.93435e-05	3	25	1	CAA91196.1; XP_005251037.1; XP_011515432.1	CAA91196.1 [3244-3258]; XP_005251037.1 [3112-3126]; XP_011515432.1 [3112-3126]		0	1653.85	100	6.09287e-17	200.7			33.97	11.9	4.32
	FALSE	High	[R].DSQDAGGFGPEDR.[L]	1.29123e-07	1.93435e-05	4	26	32	CAA91196.1; XP_005251037.1; EAW82172.1; XP_011515432.1	CAA91196.1 [1076-1088]; XP_005251037.1 [944-956]; EAW82172.1 [966-978]; XP_011515432.1 [944-956]		0	1350.56	0.996	0.966756	104.4	101.8	118.9	14.96	7.32	11.9	10.7	7.26
	FALSE	High	[K].DTHDQLSEPSEVR.[S]	1.87624e-09	1.93435e-05	3	26	63	CAA91196.1; XP_005251037.1; XP_011515432.1	CAA91196.1 [3969-3981]; XP_005251037.1 [3837-3849]; XP_011515432.1 [3837-3849]		0	1512.69	0.839	0.9434	123.6	103.3	94.6	11.16	4.71	3.41	15.58	1.28
	FALSE	High	[R].DVAEVDTVR.[R]	0.00124234	0.000154191	3	25	15	CAA91196.1; XP_005251037.1; XP_011515432.1	CAA91196.1 [3146-3154]; XP_005251037.1 [3014-3022]; XP_011515432.1 [3014-3022]		0	1003.51	0.867	0.993757	98.3	91.7	121	25.06	12.19	6.73	19.7	14.26
	FALSE	High	[R].EAEGQLQK.[L]	0.0126882	0.00111106	4	26	40	CAA91196.1; XP_005251037.1; EAW82172.1; XP_011515432.1	CAA91196.1 [870-877]; XP_005251037.1 [738-745]; EAW82172.1 [760-767]; XP_011515432.1 [738-745]		0	902.458	0.767	0.970725	92.5	100.1	96	4.06	13.39	8.2	15.09	13.51
	FALSE	High	[R].EAIAELER.[E]	0.00833516	0.000772347	4	25	24	CAA91196.1; XP_005251037.1; EAW82172.1; XP_011515432.1	CAA91196.1 [2587-2594]; XP_005251037.1 [2455-2462]; EAW82172.1 [2477-2484]; XP_011515432.1 [2455-2462]		0	930.489	1.039	0.89476	119.2	88.1	92.2	9.92	3.01	0.35	8.06	32.96
	FALSE	High	[R].EALEAESAWCYLYGTGSVAGVYLPGSR.[Q]	1.28002e-09	1.93435e-05	2	25	13	XP_005251037.1; XP_011515432.1	XP_005251037.1 [3680-3706]; XP_011515432.1 [3680-3706]		0	2907.35	0.582	0.976216	124.5	119.9	102.5	22.31	20.56	24.44	18.66	19.78
	FALSE	High	[K].EAQAVPATLPELEATK.[A]	5.25602e-07	1.93435e-05	4	26	14	CAA91196.1; XP_005251037.1; EAW82172.1; XP_011515432.1	CAA91196.1 [1251-1266]; XP_005251037.1 [1119-1134]; EAW82172.1 [1141-1156]; XP_011515432.1 [1119-1134]		0	1667.89	0.612	0.98585	128.4	119.4	92.5	3.72	2.69	4.43	0.4	3.63
	FALSE	High	[R].EEAAVDAQQQK.[R]	2.15219e-05	1.93435e-05	4	25	26	CAA91196.1; XP_005251037.1; EAW82172.1; XP_011515432.1	CAA91196.1 [1542-1552]; XP_005251037.1 [1410-1420]; EAW82172.1 [1432-1442]; XP_011515432.1 [1410-1420]		0	1216.58	1.207	0.928702	111.4	84.4	77.6	18.47	16.41	2.98	25.43	16.89
	FALSE	High	[K].EEEEVGFDWSDR.[N]	9.67592e-06	1.93435e-05	4	26	13	CAA91196.1; XP_005251037.1; EAW82172.1; XP_011515432.1	CAA91196.1 [773-784]; XP_005251037.1 [641-652]; EAW82172.1 [663-674]; XP_011515432.1 [641-652]		0	1497.61	1.43	0.838911	145.7	92.2	32	29.43	6.2	10.34	27.3	6.08
	FALSE	High	[R].EGLTSIEEVTK.[N]	5.13395e-06	1.93435e-05	3	26	11	CAA91196.1; XP_005251037.1; XP_011515432.1	CAA91196.1 [4050-4060]; XP_005251037.1 [3918-3928]; XP_011515432.1 [3918-3928]		0	1205.63	0.723	0.801681	90.3	131.8	103.9	30.72	17.38	28.38	8.31	32.58
	FALSE	High	[K].EGVVGPELHHK.[L]	0.000538914	4.2772e-05	3	25	11	CAA91196.1; XP_005251037.1; XP_011515432.1	CAA91196.1 [2893-2903]; XP_005251037.1 [2761-2771]; XP_011515432.1 [2761-2771]		0	1201.63	1.664	0.995725	77.1	98.9	121.4	19.33	27.59	23.55	39.57	39.23
	FALSE	High	[R].ELAEEAAR.[L]	0.0148027	0.00132206	4	26	39	CAA91196.1; XP_005251037.1; EAW82172.1; XP_011515432.1	CAA91196.1 [1935-1942]; XP_005251037.1 [1803-1810]; EAW82172.1 [1825-1832]; XP_011515432.1 [1803-1810]		0	888.442	1.103	0.995725	103.9	101.4	88.7	25.38	18.25	21.6	6.84	23.05
	FALSE	High	[R].ELAEQELEK.[Q]	0.000254946	4.2772e-05	4	25	32	CAA91196.1; XP_005251037.1; EAW82172.1; XP_011515432.1	CAA91196.1 [1825-1833]; XP_005251037.1 [1693-1701]; EAW82172.1 [1715-1723]; XP_011515432.1 [1693-1701]		0	1088.55	0.938	0.910378	124.1	98.2	91	3.37	1.39	1.77	2.36	1.37
	FALSE	High	[K].ELAQEQAR.[R]	0.012242	0.00109357	4	25	16	CAA91196.1; XP_005251037.1; EAW82172.1; XP_011515432.1	CAA91196.1 [2474-2481]; XP_005251037.1 [2342-2349]; EAW82172.1 [2364-2371]; XP_011515432.1 [2342-2349]		0	944.48	0.866	0.963542	101.2	109.2	99	23.09	21.73	9.61	8.69	12.14
	FALSE	High	[R].ELEQLGR.[Q]	0.0922342	0.00684346	4	26	22	CAA91196.1; XP_005251037.1; EAW82172.1; XP_011515432.1	CAA91196.1 [1338-1344]; XP_005251037.1 [1206-1212]; EAW82172.1 [1228-1234]; XP_011515432.1 [1206-1212]		0	844.452	1.182	0.611167	145.3	72.7	83.7	17.82	11.16	5.45	12.03	6.43
	FALSE	High	[K].ELIPTEEALR.[L]	0.000230833	4.2772e-05	3	26	17	CAA91196.1; XP_005251037.1; XP_011515432.1	CAA91196.1 [3926-3935]; XP_005251037.1 [3794-3803]; XP_011515432.1 [3794-3803]		0	1170.64	0.805	0.93817	121.8	104.3	96.9	2.33	7.51	5.64	9.55	0.84
	FALSE	High	[K].ELMWLNEK.[E]	0.0996148	0.00732402	4	26	6	CAA91196.1; XP_005251037.1; EAW82172.1; XP_011515432.1	CAA91196.1 [765-772]; XP_005251037.1 [633-640]; EAW82172.1 [655-662]; XP_011515432.1 [633-640]		0	1062.53	2.564	0.0752527	179	52		24.83	5.09	8.11	38.59
	FALSE	High	[K].ELQNAGDR.[L]	0.0262888	0.00211867	4	26	61	CAA91196.1; XP_005251037.1; EAW82172.1; XP_011515432.1	CAA91196.1 [811-818]; XP_005251037.1 [679-686]; EAW82172.1 [701-708]; XP_011515432.1 [679-686]		0	902.433	0.758	0.973563	107.8	110.1	105.4	24.3	28.54	23.47	8.13	23.35
	FALSE	High	[R].ELYQQLQR.[G]	0.00765779	0.000738505	3	25	36	CAA91196.1; XP_005251037.1; XP_011515432.1	CAA91196.1 [3132-3139]; XP_005251037.1 [3000-3007]; XP_011515432.1 [3000-3007]		0	1077.57	0.789	0.996401	111.9	102.7	105.8	5.86	10.43	1.86	6.73	5.84
	FALSE	High	[K].EMELPAK.[E]	0.0839587	0.00634965	4	26	26	CAA91196.1; XP_005251037.1; EAW82172.1; XP_011515432.1	CAA91196.1 [463-469]; XP_005251037.1 [331-337]; EAW82172.1 [353-359]; XP_011515432.1 [331-337]		0	817.412	0.816	0.9512	109	115.7	87.8	2.01	0.84	7.93	3.45	13.59
	FALSE	Medium	[K].EMELPAK.[E]	0.366053	0.0275393	4	26	1	CAA91196.1; XP_005251037.1; EAW82172.1; XP_011515432.1	CAA91196.1 [463-469]; XP_005251037.1 [331-337]; EAW82172.1 [353-359]; XP_011515432.1 [331-337]		0	833.407
	FALSE	High	[K].EMSVYEAYR.[K]	0.00160162	0.000154191	3	26	17	CAA91196.1; XP_005251037.1; XP_011515432.1	CAA91196.1 [4288-4296]; XP_005251037.1 [4156-4164]; XP_011515432.1 [4156-4164]		0	1147.51	0.821	0.889097	155.4	95.6	72.2	8.15	7.98	10.16	10.11	13.46
	FALSE	High	[K].EQAELEAAR.[Q]	0.00457761	0.000502794	4	26	26	CAA91196.1; XP_005251037.1; EAW82172.1; XP_011515432.1	CAA91196.1 [2100-2108]; XP_005251037.1 [1968-1976]; EAW82172.1 [1990-1998]; XP_011515432.1 [1968-1976]		0	1016.5	1.026	0.981218	136.3	87.8	71	8.98	10.03	15.58	30.78	7.92
	FALSE	High	[K].EQELQQTLQQEQSVLDQLR.[G]	2.59599e-13	1.93435e-05	3	25	12	XP_005251037.1; EAW82172.1; XP_011515432.1	XP_005251037.1 [2067-2085]; EAW82172.1 [2089-2107]; XP_011515432.1 [2067-2085]		0	2313.17	0.917	0.971929	118.8	103	99.4	9.28	4.01	2.48	9.03	2.27
	FALSE	High	[K].EQLNEYK.[G]	0.136075	0.00975809	4	26	13	CAA91196.1; XP_005251037.1; EAW82172.1; XP_011515432.1	CAA91196.1 [909-915]; XP_005251037.1 [777-783]; EAW82172.1 [799-805]; XP_011515432.1 [777-783]		0	923.447	1.209	0.782044	136.2	84.2	46.9	28.3	6.67	14.45	50.96	16.6
	FALSE	High	[R].EQLQLLEEQHR.[A]	6.83869e-06	1.93435e-05	3	25	24	CAA91196.1; XP_005251037.1; XP_011515432.1	CAA91196.1 [2733-2743]; XP_005251037.1 [2601-2611]; XP_011515432.1 [2601-2611]		0	1422.73	0.919	0.908814	125.2	96.9	77.8	1.46	5.57	12.14	2.6	4.02
	FALSE	High	[K].EQMAQQLAEETQGFQR.[T]	6.28504e-11	1.93435e-05	4	25	14	CAA91196.1; XP_005251037.1; EAW82172.1; XP_011515432.1	CAA91196.1 [2488-2503]; XP_005251037.1 [2356-2371]; EAW82172.1 [2378-2393]; XP_011515432.1 [2356-2371]		0	1893.88	0.881	0.254889	65.2	132.1	126.9	7.25	7.09	6.74	20.97	7.5
	FALSE	High	[R].ESADPLGAWLQDAR.[R]	7.75359e-09	1.93435e-05	4	26	10	CAA91196.1; XP_005251037.1; EAW82172.1; XP_011515432.1	CAA91196.1 [1351-1364]; XP_005251037.1 [1219-1232]; EAW82172.1 [1241-1254]; XP_011515432.1 [1219-1232]		0	1528.74	0.818	0.978758	119.4	105.4	99.5	7.22	2.28	1.4	8.03	0.69
	FALSE	High	[K].ESYSALMR.[E]	0.00796892	0.000755527	4	26	18	CAA91196.1; XP_005251037.1; EAW82172.1; XP_011515432.1	CAA91196.1 [793-800]; XP_005251037.1 [661-668]; EAW82172.1 [683-690]; XP_011515432.1 [661-668]		0	956.451	0.504	0.899778	108.1	117	128.3	11.87	2.43	7.35	27.7	4.56
	FALSE	High	[R].EYGSCSHHYQQLLQSLEQGAQEESR.[C]	3.69389e-10	1.93435e-05	4	26	13	CAA91196.1; XP_005251037.1; EAW82172.1; XP_011515432.1	CAA91196.1 [1094-1118]; XP_005251037.1 [962-986]; EAW82172.1 [984-1008]; XP_011515432.1 [962-986]		0	2965.3	0.35	0.988639	147.7	134.6	70.5	37.08	8.68	5.2	31.08	6.92
	FALSE	High	[K].FAEQTLR.[Q]	0.0306453	0.00249232	4	26	34	CAA91196.1; XP_005251037.1; EAW82172.1; XP_011515432.1	CAA91196.1 [2310-2316]; XP_005251037.1 [2178-2184]; EAW82172.1 [2200-2206]; XP_011515432.1 [2178-2184]		0	864.457	0.963	0.913051	120.1	97.4	105	2.89	5.76	6.05	18.28	3.33
	FALSE	Medium	[K].FKEMELPAK.[E]	0.201623	0.014016	4	26	1	CAA91196.1; XP_005251037.1; EAW82172.1; XP_011515432.1	CAA91196.1 [461-469]; XP_005251037.1 [329-337]; EAW82172.1 [351-359]; XP_011515432.1 [329-337]		1	1092.58	0.585	0.350682	52.8	47.1	329	30.3	14.24	18.55	69.68	16.08
	FALSE	High	[K].FLEGTSCIAGVFVDATK.[E]	2.09586e-09	1.93435e-05	3	26	16	CAA91196.1; XP_005251037.1; XP_011515432.1	CAA91196.1 [4065-4081]; XP_005251037.1 [3933-3949]; XP_011515432.1 [3933-3949]		0	1815.88	0.743	0.994019	122.4	111.2	98.3	3.08	10.12	8.31	7.22	9.12
	FALSE	Medium	[R].FIEQEK.[A]	0.226992	0.0157477	3	25	11	CAA91196.1; XP_005251037.1; XP_011515432.1	CAA91196.1 [2645-2650]; XP_005251037.1 [2513-2518]; XP_011515432.1 [2513-2518]		0	793.409	1.052	0.989732	95.7	112	104.4	4.72	32.71	30.25	17.1	23.72
	FALSE	High	[R].FLEVQYLTGGLIEPDTPGR.[V]	8.96258e-15	1.93435e-05	3	26	7	CAA91196.1; XP_005251037.1; XP_011515432.1	CAA91196.1 [4524-4542]; XP_005251037.1 [4392-4410]; XP_011515432.1 [4392-4410]		0	2105.09	0.779	0.987895	129.1	110.4	82.1	8.07	3.13	4.45	6.23	4.83
	FALSE	High	[R].FLEVQYLTGGLIEPDTPGRVPLDEALQR.[G]	8.93407e-14	1.93435e-05	3	26	14	CAA91196.1; XP_005251037.1; XP_011515432.1	CAA91196.1 [4524-4551]; XP_005251037.1 [4392-4419]; XP_011515432.1 [4392-4419]		1	3126.65	0.825	0.996401	96.4	92.3	156.3	19.65	6.77	6.69	22.16	6.22
	FALSE	High	[R].FLQEEAEK.[M]	0.00260812	0.000239462	4	26	28	CAA91196.1; XP_005251037.1; EAW82172.1; XP_011515432.1	CAA91196.1 [2402-2409]; XP_005251037.1 [2270-2277]; EAW82172.1 [2292-2299]; XP_011515432.1 [2270-2277]		0	993.489	0.714	0.785087	137.7	83.8	101.4	31.31	5.67	7.27	19.42	12.44
	FALSE	High	[K].FISETLR.[R]	0.0371154	0.00310565	4	26	34	CAA91196.1; XP_005251037.1; EAW82172.1; XP_011515432.1	CAA91196.1 [1473-1479]; XP_005251037.1 [1341-1347]; EAW82172.1 [1363-1369]; XP_011515432.1 [1341-1347]		0	865.478	1.037	0.857449	135.5	87.9	93.4	10.49	10.76	5.55	13.69	4.02
	FALSE	High	[R].FPSSFEEIEILWSQFLK.[F]	6.84284e-14	1.93435e-05	4	26	5	CAA91196.1; XP_005251037.1; EAW82172.1; XP_011515432.1	CAA91196.1 [444-460]; XP_005251037.1 [312-328]; EAW82172.1 [334-350]; XP_011515432.1 [312-328]		0	2100.07	0.038	6.09287e-17	9.6	277.5	170.8	54.2	118.98		12.83	22.44
	FALSE	High	[R].FPVTDAVNK.[G]	6.11595e-05	1.93435e-05	2	25	44	XP_005251037.1; XP_011515432.1	XP_005251037.1 [4335-4343]; XP_011515432.1 [4335-4343]		0	990.525	0.915	0.927259	97.2	112.6	102.3	17.94	5.84	4.96	9.52	6.11
	FALSE	Medium	[R].FRELAEEAAR.[L]	0.423326	0.0338186	4	26	1	CAA91196.1; XP_005251037.1; EAW82172.1; XP_011515432.1	CAA91196.1 [1933-1942]; XP_005251037.1 [1801-1810]; EAW82172.1 [1823-1832]; XP_011515432.1 [1801-1810]		1	1191.61					500					12.56
	FALSE	High	[R].GANVIAGVWLEEAGQK.[L]	9.62642e-09	1.93435e-05	3	25	19	CAA91196.1; XP_005251037.1; XP_011515432.1	CAA91196.1 [3159-3174]; XP_005251037.1 [3027-3042]; XP_011515432.1 [3027-3042]		0	1641.86	0.902	0.996527	111.9	101.7	102.6	8.76	2.54	1.52	10.18	0.11
	FALSE	High	[R].GAQEVGER.[L]	0.0413161	0.00338982	4	26	10	CAA91196.1; XP_005251037.1; EAW82172.1; XP_011515432.1	CAA91196.1 [1292-1299]; XP_005251037.1 [1160-1167]; EAW82172.1 [1182-1189]; XP_011515432.1 [1160-1167]		0	845.411	17.23	2.26504e-06	68.1	31.3	102	28.61	8.77	10.84	116.33	78.41
	FALSE	High	[R].GCLDEETSR.[A]	0.00212564	0.000195525	3	25	32	CAA91196.1; XP_005251037.1; XP_011515432.1	CAA91196.1 [3298-3306]; XP_005251037.1 [3166-3174]; XP_011515432.1 [3166-3174]		0	1067.43	1.202	0.491438	146.5	80.1	84.9	8.7	17.31	18.59	10.86	5.34
	FALSE	High	[K].GDECQLVGPAQPSHWK.[V]	1.40583e-10	1.93435e-05	4	26	12	CAA91196.1; XP_005251037.1; EAW82172.1; XP_011515432.1	CAA91196.1 [962-977]; XP_005251037.1 [830-845]; EAW82172.1 [852-867]; XP_011515432.1 [830-845]		0	1809.82	1.133	0.961454	123.4	96.3	58.7	3.3	6.35	8.03	16.09	3.91
	FALSE	High	[K].GFFDPNTEENLTYLQLMER.[C]	2.87612e-12	1.93435e-05	3	26	10	CAA91196.1; XP_005251037.1; XP_011515432.1	CAA91196.1 [4226-4244]; XP_005251037.1 [4094-4112]; XP_011515432.1 [4094-4112]		0	2317.08	0.331	0.98524	159.4	113.4	82.7	46.59	52.5	31.49	24.15	34.89
	FALSE	High	[K].GFFDPNTEENLTYLQLMER.[C]	3.08603e-12	1.93435e-05	3	26	7	CAA91196.1; XP_005251037.1; XP_011515432.1	CAA91196.1 [4226-4244]; XP_005251037.1 [4094-4112]; XP_011515432.1 [4094-4112]		0	2333.08	100	6.09287e-17	137.2	62.3	62.1	15.06	54.18	37.48		56.25
	FALSE	High	[K].GFFDPNTHENLTYLQLLER.[C]	2.98473e-11	1.93435e-05	4	33	5	CAA91196.1; XP_005251037.1; XP_016869381.1; XP_011515432.1	CAA91196.1 [2989-3007]; XP_005251037.1 [2857-2875]; XP_016869381.1 [799-817]; [1760-1778]; XP_011515432.1 [2857-2875]		0	2307.14	0.828	0.906798	132.5	94.6	90	15.04	5.35	7.79	12.68	3
	FALSE	High	[K].GFFDPNTHENLTYR.[Q]	1.47838e-10	1.93435e-05	3	25	27	CAA91196.1; XP_005251037.1; XP_011515432.1	CAA91196.1 [3648-3661]; XP_005251037.1 [3516-3529]; XP_011515432.1 [3516-3529]		0	1710.79	1	0.869908	113	92.9	99.9	3.45	2.11	4.5	14.54	6.81
	FALSE	High	[R].GGAEGELQALR.[A]	0.000197864	4.2772e-05	4	25	13	CAA91196.1; XP_005251037.1; EAW82172.1; XP_011515432.1	CAA91196.1 [1606-1616]; XP_005251037.1 [1474-1484]; EAW82172.1 [1496-1506]; XP_011515432.1 [1474-1484]		0	1100.57	0.667	0.739859	91.2	122.8	125.7	22.95	0.55	24.31	4.23	2.06
	FALSE	High	[K].GGELVYTDSEAR.[D]	6.24671e-06	1.93435e-05	3	24	28	CAA91196.1; XP_005251037.1; XP_011515432.1	CAA91196.1 [3028-3039]; XP_005251037.1 [2896-2907]; XP_011515432.1 [2896-2907]		0	1296.61	0.971	0.963595	117.5	97.2	92	3.85	3.62	7.96	17.55	20.37
	FALSE	High	[K].GHLSGLAK.[R]	0.0101937	0.000875016	4	26	24	CAA91196.1; XP_005251037.1; EAW82172.1; XP_011515432.1	CAA91196.1 [916-923]; XP_005251037.1 [784-791]; EAW82172.1 [806-813]; XP_011515432.1 [784-791]		0	782.452	0.613	0.88519	129	98.5	97.7	21.64	17.3	17.6	53.62	9.9
	FALSE	High	[R].GLFDEEMNEILTDPSDDTK.[G]	7.4302e-13	1.93435e-05	3	26	15	CAA91196.1; XP_005251037.1; XP_011515432.1	CAA91196.1 [4207-4225]; XP_005251037.1 [4075-4093]; XP_011515432.1 [4075-4093]		0	2168.95	0.76	0.988108	111	106.3	101.4	10.26	6.44	2.23	5.69	3.31
	FALSE	High	[R].GLFDEEMNEILTDPSDDTK.[G]	3.69202e-13	1.93435e-05	3	26	5	CAA91196.1; XP_005251037.1; XP_011515432.1	CAA91196.1 [4207-4225]; XP_005251037.1 [4075-4093]; XP_011515432.1 [4075-4093]		0	2184.95	100	6.09287e-17	93.2	77.4	95.8	45.82	62.32	48.51
	FALSE	High	[R].GLHQSIEEFR.[A]	0.000206921	4.2772e-05	3	25	28	XP_005251037.1; EAW82172.1; XP_011515432.1	XP_005251037.1 [565-574]; EAW82172.1 [587-596]; XP_011515432.1 [565-574]		0	1215.61	0.775	0.950949	116.1	110.7	103.3	16.08	7.52	16.11	9.92	11.49
	FALSE	High	[K].GIIRPGTAFELLEAQAATGYVIDPIK.[G]	4.17918e-14	1.93435e-05	3	26	6	CAA91196.1; XP_005251037.1; XP_011515432.1	CAA91196.1 [4093-4118]; XP_005251037.1 [3961-3986]; XP_011515432.1 [3961-3986]		0	2743.5	0.526	0.986139	119.4	104.4	132.2	21.58	3.55	10.12	7.57	5.62
	FALSE	High	[K].GLLSAEVAR.[L]	0.00326076	0.000367025	3	26	22	CAA91196.1; XP_005251037.1; XP_011515432.1	CAA91196.1 [3850-3858]; XP_005251037.1 [3718-3726]; XP_011515432.1 [3718-3726]		0	915.526	0.614	0.747015	86.8	120.2	153	9.32	6.87	17.35	10.13	18.65
	FALSE	High	[K].GLVEDTLR.[Q]	0.0304833	0.00249232	4	26	30	CAA91196.1; XP_005251037.1; EAW82172.1; XP_011515432.1	CAA91196.1 [2048-2055]; XP_005251037.1 [1916-1923]; EAW82172.1 [1938-1945]; XP_011515432.1 [1916-1923]		0	902.494	0.784	0.988852	114	108.1	106.3	5.8	9.77	15	11.14	1.43
	FALSE	High	[K].GLVGPELHDR.[L]	2.2975e-05	1.93435e-05	3	26	26	CAA91196.1; XP_005251037.1; XP_011515432.1	CAA91196.1 [3888-3897]; XP_005251037.1 [3756-3765]; XP_011515432.1 [3756-3765]		0	1092.58	0.931	0.987247	111.3	94.3	97.8	7.9	8.12	8.16	13.1	4.28
	FALSE	High	[K].GIYQSLEGAVQAGQLK.[V]	2.79201e-09	1.93435e-05	4	26	18	CAA91196.1; XP_005251037.1; EAW82172.1; XP_011515432.1	CAA91196.1 [478-493]; XP_005251037.1 [346-361]; EAW82172.1 [368-383]; XP_011515432.1 [346-361]		0	1661.89	0.869	0.970092	118.4	98.7	99.1	4.14	4.86	1.5	1.44	1.94
	FALSE	High	[K].GRLCFEGLR.[S]	0.0234119	0.00181324	3	25	2	CAA91196.1; XP_005251037.1; XP_011515432.1	CAA91196.1 [3107-3115]; XP_005251037.1 [2975-2983]; XP_011515432.1 [2975-2983]		1	1108.56	7.238	0.329724	130.2	44.2	62.9	75.69	6.14	0.41	10.31	27.5
	FALSE	High	[R].GRLPLLAVCDYK.[Q]	1.23797e-05	1.93435e-05	4	26	8	CAA91196.1; XP_005251037.1; EAW82172.1; XP_011515432.1	CAA91196.1 [942-953]; XP_005251037.1 [810-821]; EAW82172.1 [832-843]; XP_011515432.1 [810-821]		1	1405.75	0.589	0.977874	111.8	108.4	133.9	11.05	12.86	7.9	20.03	2.31
	FALSE	High	[R].GTQGAEEVLR.[A]	0.000211077	4.2772e-05	4	26	20	CAA91196.1; XP_005251037.1; EAW82172.1; XP_011515432.1	CAA91196.1 [1234-1243]; XP_005251037.1 [1102-1111]; EAW82172.1 [1124-1133]; XP_011515432.1 [1102-1111]		0	1059.54	0.994	0.953583	91.7	108.5	86.5	18.3	4.51	8.03	17.57	5.02
	FALSE	High	[K].GWLYYEAGQR.[F]	0.00123628	0.000154191	3	26	9	CAA91196.1; XP_005251037.1; XP_011515432.1	CAA91196.1 [4514-4523]; XP_005251037.1 [4382-4391]; XP_011515432.1 [4382-4391]		0	1242.59	4.401	3.88448e-05	183.4	14.5	129.4	39.57	8.72	9.17	87.73	17.45
	FALSE	High	[CR].GYFDEEMNR.[IV]	0.00354074	0.000427246	4	34	11	CAA91196.1; XP_005251037.1; XP_016869381.1; XP_011515432.1	CAA91196.1 [2970-2978]; XP_005251037.1 [2838-2846]; XP_016869381.1 [1741-1749]; [2399-2407]; [2935-2943]; [3466-3474]; [4000-4008]; XP_011515432.1 [2838-2846]		0	1160.47	0.901	0.882338	131.2	93	85.3	12.04	4.26	3.69	5.12	3.53
	FALSE	Medium	[CR].GYFDEEMNR.[IV]	0.146394	0.010381	4	34	2	CAA91196.1; XP_005251037.1; XP_016869381.1; XP_011515432.1	CAA91196.1 [2970-2978]; XP_005251037.1 [2838-2846]; XP_016869381.1 [1741-1749]; [2399-2407]; [2935-2943]; [3466-3474]; [4000-4008]; XP_011515432.1 [2838-2846]		0	1176.46	100	6.09287e-17	178.5		99	70.9	16.7	30.48
	FALSE	High	[R].GYFSEEMNR.[V]	0.00198535	0.000195525	3	25	31	CAA91196.1; XP_005251037.1; XP_011515432.1	CAA91196.1 [3629-3637]; XP_005251037.1 [3497-3505]; XP_011515432.1 [3497-3505]		0	1132.47	1.093	0.83507	125.6	81.9	101.2	0.61	17.8	20.77	14.09	8.2
	FALSE	High	[R].GYFSEEMNR.[V]	0.0224477	0.00170588	3	25	3	CAA91196.1; XP_005251037.1; XP_011515432.1	CAA91196.1 [3629-3637]; XP_005251037.1 [3497-3505]; XP_011515432.1 [3497-3505]		0	1148.47	0.463	0.261146	133.6	66	74	48.1	10.99	34.04	67.08	7.77
	FALSE	High	[K].GYYSPYSVSGSGSTAGSR.[T]	5.61892e-09	1.93435e-05	3	26	3	CAA91196.1; XP_005251037.1; XP_011515432.1	CAA91196.1 [4610-4627]; XP_005251037.1 [4478-4495]; XP_011515432.1 [4478-4495]		0	1782.79					500					20.07
	FALSE	High	[R].HHTAAFEER.[R]	0.053322	0.00421755	4	26	11	CAA91196.1; XP_005251037.1; EAW82172.1; XP_011515432.1	CAA91196.1 [434-442]; XP_005251037.1 [302-310]; EAW82172.1 [324-332]; XP_011515432.1 [302-310]		0	1097.51	0.479	0.0760166	79.5	169.3	96.3	12.98	15.77	20.53	7.13	5.22
	FALSE	High	[R].HKPLLIDMNK.[V]	0.000631175	6.84312e-05	4	26	19	CAA91196.1; XP_005251037.1; EAW82172.1; XP_011515432.1	CAA91196.1 [337-346]; XP_005251037.1 [205-214]; EAW82172.1 [227-236]; XP_011515432.1 [209-218]		0	1208.68	0.318	0.937846	104	102.5	162.9	24.89	31.44	16.33	27.46	22.6
	FALSE	High	[R].HISDLYEDLR.[D]	6.31994e-08	1.93435e-05	4	26	13	CAA91196.1; XP_005251037.1; EAW82172.1; XP_011515432.1	CAA91196.1 [199-208]; XP_005251037.1 [67-76]; EAW82172.1 [89-98]; XP_011515432.1 [71-80]		0	1260.62	0.767	0.991058	108	110.8	115.5	8.43	12.48	9.01	9.63	7.92
	FALSE	High	[R].HPQGEQMYR.[R]	2.44032e-05	1.93435e-05	4	26	30	CAA91196.1; XP_005251037.1; EAW82172.1; XP_011515432.1	CAA91196.1 [601-609]; XP_005251037.1 [469-477]; EAW82172.1 [491-499]; XP_011515432.1 [469-477]		0	1145.52	1.115	0.990354	104.3	91.7	102.2	12.27	17.71	28.59	6.46	6.36
	FALSE	High	[R].HPQGEQMYR.[R]	0.108703	0.00806051	4	26	4	CAA91196.1; XP_005251037.1; EAW82172.1; XP_011515432.1	CAA91196.1 [601-609]; XP_005251037.1 [469-477]; EAW82172.1 [491-499]; XP_011515432.1 [469-477]		0	1161.51	1.873	0.467274	197.9	87.5	61.1	70.39	43.79	11.2	76.48	4.65
	FALSE	Medium	[R].HYLQGR.[S]	0.338375	0.0248041	3	25	11	CAA91196.1; XP_005251037.1; XP_011515432.1	CAA91196.1 [2827-2832]; XP_005251037.1 [2695-2700]; XP_011515432.1 [2695-2700]		0	773.405	0.655	0.957907	117.4	124.6	80.1	12.76	14.75	12.97	10.61	6.65
	FALSE	Medium	[R].KAALEEVER.[L]	0.500199	0.042583	4	26	1	CAA91196.1; XP_005251037.1; EAW82172.1; XP_011515432.1	CAA91196.1 [2142-2150]; XP_005251037.1 [2010-2018]; EAW82172.1 [2032-2040]; XP_011515432.1 [2010-2018]		1	1044.57
	FALSE	High	[R].KASDSELER.[Q]	0.00186333	0.000154191	4	26	16	CAA91196.1; XP_005251037.1; EAW82172.1; XP_011515432.1	CAA91196.1 [2037-2045]; XP_005251037.1 [1905-1913]; EAW82172.1 [1927-1935]; XP_011515432.1 [1905-1913]		1	1034.51	0.872	0.719764	74	117.6	134	19.15	5.66	8.77	14.9	14.19
	FALSE	High	[K].KELIPTEEALR.[L]	0.0292189	0.00234049	3	26	6	CAA91196.1; XP_005251037.1; XP_011515432.1	CAA91196.1 [3925-3935]; XP_005251037.1 [3793-3803]; XP_011515432.1 [3793-3803]		1	1298.73	1.44	0.9933	104.2	90.1	53	5.01	9.48	5.02	30.97	5.89
	FALSE	High	[K].KESYSALMR.[E]	0.0138444	0.0012172	4	26	4	CAA91196.1; XP_005251037.1; EAW82172.1; XP_011515432.1	CAA91196.1 [792-800]; XP_005251037.1 [660-668]; EAW82172.1 [682-690]; XP_011515432.1 [660-668]		1	1084.55	0.01	6.09287e-17		174.5	325.5				70.48	39.98
	FALSE	High	[R].KGLVGPELHDR.[L]	1.72879e-07	1.93435e-05	3	26	9	CAA91196.1; XP_005251037.1; XP_011515432.1	CAA91196.1 [3887-3897]; XP_005251037.1 [3755-3765]; XP_011515432.1 [3755-3765]		1	1220.67	0.597	0.351972	79.9	111.3	124.1	28.34	19.15	39.18	42.01	47.34
	FALSE	High	[R].KQAEEIGEK.[L]	0.000206921	4.2772e-05	4	25	17	CAA91196.1; XP_005251037.1; EAW82172.1; XP_011515432.1	CAA91196.1 [2545-2553]; XP_005251037.1 [2413-2421]; EAW82172.1 [2435-2443]; XP_011515432.1 [2413-2421]		1	1031.54	0.539	0.979924	107.7	111.8	133.8	34.67	34.07	17.73	30.4	9.76
	FALSE	High	[R].KQEELQQLEQQR.[R]	7.68625e-11	1.93435e-05	3	25	40	CAA91196.1; XP_005251037.1; XP_011515432.1	CAA91196.1 [2706-2717]; XP_005251037.1 [2574-2585]; XP_011515432.1 [2574-2585]		1	1556.8	0.706	0.638927	91.9	129.8	96.1	3.86	11.27	10.98	8.48	5.82
	FALSE	High	[R].KQITMEELVR.[S]	0.00223182	0.000195525	3	26	2	CAA91196.1; XP_005251037.1; XP_011515432.1	CAA91196.1 [4027-4036]; XP_005251037.1 [3895-3904]; XP_011515432.1 [3895-3904]		1	1246.68	0.127	0.0621309	92.3	238.2	45.5	92.27		32.45	67.43	11.29
	FALSE	High	[R].LAAEQELIR.[L]	0.000326768	4.2772e-05	4	25	19	CAA91196.1; XP_005251037.1; EAW82172.1; XP_011515432.1	CAA91196.1 [1846-1854]; XP_005251037.1 [1714-1722]; EAW82172.1 [1736-1744]; XP_011515432.1 [1714-1722]		0	1042.59	1.055	0.783716	120.8	88.2	98.7	11.39	1.79	12.77	3.05	8.25
	FALSE	High	[K].LAAIGEATR.[L]	0.00229804	0.000195525	4	26	23	CAA91196.1; XP_005251037.1; EAW82172.1; XP_011515432.1	CAA91196.1 [1976-1984]; XP_005251037.1 [1844-1852]; EAW82172.1 [1866-1874]; XP_011515432.1 [1844-1852]		0	901.51	0.948	0.810223	112.8	96.1	101.3	7.24	5.39	5.21	15.97	29.65
	FALSE	High	[R].LAEDEAFQR.[R]	0.0002666	4.2772e-05	4	26	24	CAA91196.1; XP_005251037.1; EAW82172.1; XP_011515432.1	CAA91196.1 [2006-2014]; XP_005251037.1 [1874-1882]; EAW82172.1 [1896-1904]; XP_011515432.1 [1874-1882]		0	1078.52	1.059	0.960983	107.2	110.9	94.5	20.01	29.35	5.1	20.5	1.01
	FALSE	High	[R].LAEVEAALEK.[Q]	2.16304e-05	1.93435e-05	4	25	15	CAA91196.1; XP_005251037.1; EAW82172.1; XP_011515432.1	CAA91196.1 [1499-1508]; XP_005251037.1 [1367-1376]; EAW82172.1 [1389-1398]; XP_011515432.1 [1367-1376]		0	1072.59	0.928	0.988639	107.9	97.5	91.7	13.17	13.1	5.95	5.17	9.01
	FALSE	High	[R].LAQGHTTVDELAR.[R]	9.95312e-10	1.93435e-05	3	25	30	CAA91196.1; XP_005251037.1; XP_011515432.1	CAA91196.1 [2809-2821]; XP_005251037.1 [2677-2689]; XP_011515432.1 [2677-2689]		0	1410.73	0.794	0.680593	141.9	85.7	89.6	25.63	1.48	2.18	5.38	11.31
	FALSE	High	[R].LCFEGLR.[S]	0.0834946	0.00628824	3	25	17	CAA91196.1; XP_005251037.1; XP_011515432.1	CAA91196.1 [3109-3115]; XP_005251037.1 [2977-2983]; XP_011515432.1 [2977-2983]		0	895.434	100	6.09287e-17	160	2	109.9	106.34	10.35	9.64		85.26
	FALSE	High	[R].LDLQYAK.[L]	0.0308082	0.00249232	4	26	23	CAA91196.1; XP_005251037.1; EAW82172.1; XP_011515432.1	CAA91196.1 [734-740]; XP_005251037.1 [602-608]; EAW82172.1 [624-630]; XP_011515432.1 [602-608]		0	850.467	0.824	0.974464	106.5	105.7	113.5	15.31	11.52	2.44	6.97	8.5
	FALSE	High	[R].LEAEAGR.[F]	0.0897236	0.00663537	4	26	24	CAA91196.1; XP_005251037.1; EAW82172.1; XP_011515432.1	CAA91196.1 [1926-1932]; XP_005251037.1 [1794-1800]; EAW82172.1 [1816-1822]; XP_011515432.1 [1794-1800]		0	745.384	0.825	0.976216	112.6	114.5	71.3	10.58	14.71	4.46	23.35	18.82
	FALSE	Medium	[R].LECLQR.[I]	0.195865	0.0136042	4	26	29	CAA91196.1; XP_005251037.1; EAW82172.1; XP_011515432.1	CAA91196.1 [528-533]; XP_005251037.1 [396-401]; EAW82172.1 [418-423]; XP_011515432.1 [396-401]		0	819.403	0.892	0.906235	128.5	96.9	104	6.07	6.1	8.17	6.71	5.4
	FALSE	High	[R].LEDLLQDAQDEK.[E]	2.27995e-07	1.93435e-05	4	26	16	CAA91196.1; XP_005251037.1; EAW82172.1; XP_011515432.1	CAA91196.1 [897-908]; XP_005251037.1 [765-776]; EAW82172.1 [787-798]; XP_011515432.1 [765-776]		0	1416.69	1.066	0.950492	126.3	108	57.8	8.81	1.61	2.74	21.65	2.82
	FALSE	High	[R].LEDLLQDAQDEKEQLNEYK.[G]	1.2562e-11	1.93435e-05	4	26	5	CAA91196.1; XP_005251037.1; EAW82172.1; XP_011515432.1	CAA91196.1 [897-915]; XP_005251037.1 [765-783]; EAW82172.1 [787-805]; XP_011515432.1 [765-783]		1	2321.11	0.01	6.09287e-17		163.6	336.4				45.22	1.92
	FALSE	High	[K].LEQLFQDEVAK.[A]	9.43564e-06	1.93435e-05	3	25	15	CAA91196.1; XP_005251037.1; XP_011515432.1	CAA91196.1 [2653-2663]; XP_005251037.1 [2521-2531]; XP_011515432.1 [2521-2531]		0	1319.68	0.962	0.919606	130.7	101.8	75.3	8.94	3.28	0.61	15.8	5
	FALSE	High	[R].LFNAIIHR.[H]	1.6079e-05	1.93435e-05	4	26	32	CAA91196.1; XP_005251037.1; EAW82172.1; XP_011515432.1	CAA91196.1 [329-336]; XP_005251037.1 [197-204]; EAW82172.1 [219-226]; XP_011515432.1 [201-208]		0	983.579	0.428	0.0392013	64	172	106.1	10.79	9.2	23.28	12.61	14.8
	FALSE	High	[K].LHVAILER.[E]	0.0104023	0.000875016	4	26	11	CAA91196.1; XP_005251037.1; EAW82172.1; XP_011515432.1	CAA91196.1 [510-517]; XP_005251037.1 [378-385]; EAW82172.1 [400-407]; XP_011515432.1 [378-385]		0	950.578	0.693	0.844629	110	123.6	91.4	13.48	3.78	7.36	27.33	14.34
	FALSE	High	[R].LKAEAELLQQQK.[E]	1.0348e-07	1.93435e-05	4	25	24	CAA91196.1; XP_005251037.1; EAW82172.1; XP_011515432.1	CAA91196.1 [2462-2473]; XP_005251037.1 [2330-2341]; EAW82172.1 [2352-2363]; XP_011515432.1 [2330-2341]		1	1398.8	0.876	0.948279	106.3	90.1	137.6	2.9	6.45	24.39	30.47	3.88
	FALSE	High	[R].LKAEATEAAR.[Q]	0.00184523	0.000154191	4	26	7	CAA91196.1; XP_005251037.1; EAW82172.1; XP_011515432.1	CAA91196.1 [2349-2358]; XP_005251037.1 [2217-2226]; EAW82172.1 [2239-2248]; XP_011515432.1 [2217-2226]		1	1059.58	1.03	0.911379	95.6	92.2	128.4	6.09	85.12	19.76	12.98	6.15
	FALSE	High	[R].LKTEAEIALK.[E]	0.000894994	9.10162e-05	4	26	13	CAA91196.1; XP_005251037.1; EAW82172.1; XP_011515432.1	CAA91196.1 [1985-1994]; XP_005251037.1 [1853-1862]; EAW82172.1 [1875-1884]; XP_011515432.1 [1853-1862]		1	1115.67	0.761	0.944222	85.1	93.4	240	88.51	8.83	10.94	87.64	16.55
	FALSE	High	[R].LLDAQLATGGIVDPR.[L]	9.24663e-09	1.93435e-05	3	26	13	CAA91196.1; XP_005251037.1; XP_011515432.1	CAA91196.1 [3936-3950]; XP_005251037.1 [3804-3818]; XP_011515432.1 [3804-3818]		0	1538.85	0.852	0.957907	122.9	99.3	100.8	0.61	3.21	3	6.75	2.78
	FALSE	High	[R].LLDAQLSTGGIVDPSK.[S]	2.11315e-10	1.93435e-05	3	25	15	CAA91196.1; XP_005251037.1; XP_011515432.1	CAA91196.1 [3270-3285]; XP_005251037.1 [3138-3153]; XP_011515432.1 [3138-3153]		0	1613.87	0.78	0.981442	121.8	103.7	99.3	1.35	6.29	2.15	2.38	1.32
	FALSE	High	[R].LLDPEDVDVPQPDEK.[S]	2.88676e-10	1.93435e-05	4	26	18	CAA91196.1; XP_005251037.1; EAW82172.1; XP_011515432.1	CAA91196.1 [372-386]; XP_005251037.1 [240-254]; EAW82172.1 [262-276]; XP_011515432.1 [244-258]		0	1708.83	0.878	0.859034	128.1	100.4	82	10.45	3.5	4.62	3.51	3.36
	FALSE	High	[R].LLEAAAQSTK.[G]	9.8919e-05	1.93435e-05	3	26	30	CAA91196.1; XP_005251037.1; XP_011515432.1	CAA91196.1 [4600-4609]; XP_005251037.1 [4468-4477]; XP_011515432.1 [4468-4477]		0	1031.57	0.836	0.545246	155.3	82.7	99.8	24.03	12.03	4.18	21.3	9.83
	FALSE	High	[R].LLEAQACTGGIIDPSTGER.[FL]	2.42266e-15	1.93435e-05	3	26	15	CAA91196.1; XP_005251037.1; XP_011515432.1	CAA91196.1 [4448-4466]; XP_005251037.1 [4316-4334]; XP_011515432.1 [4316-4334]		0	1988.96	0.859	0.918121	143.8	98.9	68.3	4.09	11.27	7.9	4.26	9.45
	FALSE	High	[R].LLEAQACTGGIIDPSTGERFPVTDAVNK.[G]	5.57759e-13	1.93435e-05	2	25	6	XP_005251037.1; XP_011515432.1	XP_005251037.1 [4316-4343]; XP_011515432.1 [4316-4343]		1	2960.47	0.01	6.09287e-17		500					69.81
	FALSE	High	[R].LLEAQIATGGIIDPEESHR.[L]	2.72629e-11	1.93435e-05	3	26	10	CAA91196.1; XP_005251037.1; XP_011515432.1	CAA91196.1 [4179-4197]; XP_005251037.1 [4047-4065]; XP_011515432.1 [4047-4065]		0	2049.06	0.675	0.95648	139.3	114.3	75	13.85	14.98	3.49	12.9	3.42
	FALSE	High	[R].LLEAQIATGGIIDPVHSHR.[V]	7.19959e-11	1.93435e-05	3	31	6	XP_005251037.1; XP_016869381.1; XP_011515432.1	XP_005251037.1 [3469-3487]; XP_016869381.1 [1713-1731]; XP_011515432.1 [3469-3487]		0	2027.1	8.104	0.70703	44.9	35.9	61.1	10.81		26.72	92.81	113.01
	FALSE	High	[R].LLEAQIATGGVIDPVHSHR.[V]	1.13594e-11	1.93435e-05	4	34	13	CAA91196.1; XP_005251037.1; XP_016869381.1; XP_011515432.1	CAA91196.1 [2942-2960]; XP_005251037.1 [2810-2828]; XP_016869381.1 [752-770]; [2371-2389]; [2907-2925]; [3438-3456]; [3972-3990]; XP_011515432.1 [2810-2828]		0	2013.09	0.143	0.924339	139.5	128.2	142	8.35	7.1	10.49	17.94	8.23
	FALSE	High	[R].LLFNDVQTLK.[D]	0.000215317	4.2772e-05	4	26	9	CAA91196.1; XP_005251037.1; EAW82172.1; XP_011515432.1	CAA91196.1 [588-597]; XP_005251037.1 [456-465]; EAW82172.1 [478-487]; XP_011515432.1 [456-465]		0	1190.68	0.796	0.989836	105.5	113.2	106.8	1.21	2.85	1.99	2
	FALSE	High	[R].LLLEAQAATGFLLDPVK.[G]	2.06066e-10	1.93435e-05	3	26	12	CAA91196.1; XP_005251037.1; XP_011515432.1	CAA91196.1 [3859-3875]; XP_005251037.1 [3727-3743]; XP_011515432.1 [3727-3743]		0	1799.03	0.01	6.09287e-17	9.3	315	175.7			17.13
	FALSE	High	[R].LLLEAQAATGFLLDPVKGER.[L]	1.36655e-09	1.93435e-05	3	26	10	CAA91196.1; XP_005251037.1; XP_011515432.1	CAA91196.1 [3859-3878]; XP_005251037.1 [3727-3746]; XP_011515432.1 [3727-3746]		1	2141.2	0.01	0.93032	157.1	94.5	136.9		67.33	39.04	27.87	21.43
	FALSE	High	[K].ILITIVEEVETLR.[Q]	1.00403e-07	1.93435e-05	3	25	20	CAA91196.1; XP_005251037.1; XP_011515432.1	CAA91196.1 [3424-3436]; XP_005251037.1 [3292-3304]; XP_011515432.1 [3292-3304]		0	1527.9	0.653	1	131.3	107.5	79.4	19.43	7.21	10.71	11.77	7.22
	FALSE	High	[K].IIITVVEEQEQK.[G]	3.92573e-07	1.93435e-05	3	25	33	CAA91196.1; XP_005251037.1; XP_011515432.1	CAA91196.1 [3095-3106]; XP_005251037.1 [2963-2974]; XP_011515432.1 [2963-2974]		0	1428.79	0.633	0.999335	117.8	112.3	123	13.7	7.96	2.94	2.8	5.29
	FALSE	High	[K].LLLWSQR.[M]	0.0272783	0.00215105	4	26	9	CAA91196.1; XP_005251037.1; EAW82172.1; XP_011515432.1	CAA91196.1 [301-307]; XP_005251037.1 [169-175]; EAW82172.1 [191-197]; XP_011515432.1 [173-179]		0	915.541	0.658	0.785305	153.2	93.5	90.5	6.67	8.62	8.31	2.41	21.98
	FALSE	High	[R].IISLETYNLLR.[E]	7.81828e-05	1.93435e-05	3	26	3	CAA91196.1; XP_005251037.1; XP_011515432.1	CAA91196.1 [3794-3804]; XP_005251037.1 [3662-3672]; XP_011515432.1 [3662-3672]		0	1334.77	100				243.9	7.74				7.89
	FALSE	High	[K].LISLFQAMK.[K]	0.000422864	4.2772e-05	3	26	12	CAA91196.1; XP_005251037.1; XP_011515432.1	CAA91196.1 [4159-4167]; XP_005251037.1 [4027-4035]; XP_011515432.1 [4027-4035]		0	1050.6	0.513	0.395213	194.1	83.9	74.3	20.84	5.21	17.77	2.59	14.08
	FALSE	Medium	[R].INLAQK.[A]	0.523313	0.0458952	3	26	14	CAA91196.1; XP_005251037.1; XP_011515432.1	CAA91196.1 [4486-4491]; XP_005251037.1 [4354-4359]; XP_011515432.1 [4354-4359]		0	686.42	1.189	0.973563	104.7	99.1	93.4	20.92	6.87	10.46	21.94	14.23
	FALSE	High	[R].LPLDKEPAR.[E]	0.000181817	4.2772e-05	4	26	34	CAA91196.1; XP_005251037.1; EAW82172.1; XP_011515432.1	CAA91196.1 [1146-1154]; XP_005251037.1 [1014-1022]; EAW82172.1 [1036-1044]; XP_011515432.1 [1014-1022]		1	1038.59	1.066	0.949323	120.4	96.6	79.1	1.38	3.72	8.21	17.64	10.61
	FALSE	High	[R].LPLLAVCDYK.[Q]	0.00011265	1.93435e-05	4	26	1	CAA91196.1; XP_005251037.1; EAW82172.1; XP_011515432.1	CAA91196.1 [944-953]; XP_005251037.1 [812-821]; EAW82172.1 [834-843]; XP_011515432.1 [812-821]		0	1192.63
	FALSE	High	[R].LPVEVAYK.[R]	0.00257033	0.000217647	3	26	12	CAA91196.1; XP_005251037.1; XP_011515432.1	CAA91196.1 [4198-4205]; XP_005251037.1 [4066-4073]; XP_011515432.1 [4066-4073]		0	918.529	0.995	0.602447	143.7	84	61.8	11.2	4.32	8.36	18.8	13.31
	FALSE	High	[R].LQAEEAER.[RW]	0.00405508	0.000483359	4	25	35	CAA91196.1; XP_005251037.1; EAW82172.1; XP_011515432.1	CAA91196.1 [1680-1687]; XP_005251037.1 [1548-1555]; EAW82172.1 [1570-1577]; XP_011515432.1 [1548-1555]		0	945.464	1.452	0.499685	136.7	78.9	97.7	16.19	14.07	7.33	27.94	2.26
	FALSE	High	[R].LQAEEVAQQK.[S]	7.28875e-05	1.93435e-05	3	24	36	XP_005251037.1; EAW82172.1; XP_011515432.1	XP_005251037.1 [1651-1660]; EAW82172.1 [1673-1682]; XP_011515432.1 [1651-1660]		0	1143.6	0.797	0.949877	107.7	117.3	93.5	22.02	7.78	3.59	18.91	7.68
	FALSE	High	[R].LQEAGILSAEELQR.[L]	7.46144e-08	1.93435e-05	3	25	17	CAA91196.1; XP_005251037.1; XP_011515432.1	CAA91196.1 [2795-2808]; XP_005251037.1 [2663-2676]; XP_011515432.1 [2663-2676]		0	1556.83	0.947	0.780059	124.2	93.2	94.6	1.33	2.93	4.43	4.62	9.1
	FALSE	High	[R].LQEDKEQMAQQLAEETQGFQR.[T]	4.40295e-13	1.93435e-05	4	25	15	CAA91196.1; XP_005251037.1; EAW82172.1; XP_011515432.1	CAA91196.1 [2483-2503]; XP_005251037.1 [2351-2371]; EAW82172.1 [2373-2393]; XP_011515432.1 [2351-2371]		1	2507.18	0.587	0.974952	119	114.7	130.9	3.96	11.68	8.14	17.18	7.64
	FALSE	High	[R].LQLEACETR.[T]	0.000394524	4.2772e-05	4	26	35	CAA91196.1; XP_005251037.1; EAW82172.1; XP_011515432.1	CAA91196.1 [1131-1139]; XP_005251037.1 [999-1007]; EAW82172.1 [1021-1029]; XP_011515432.1 [999-1007]		0	1120.53	0.92	0.990383	98.4	100.3	122.1	11.11	3.93	7.66	13.92	3.14
	FALSE	High	[R].LQLEATER.[Q]	0.00321368	0.000367025	4	25	57	CAA91196.1; XP_005251037.1; EAW82172.1; XP_011515432.1	CAA91196.1 [1596-1603]; XP_005251037.1 [1464-1471]; EAW82172.1 [1486-1493]; XP_011515432.1 [1464-1471]		0	959.516	0.778	0.959601	104.7	107	115.6	11.39	5.88	1.77	3.19	19.83
	FALSE	High	[R].LQLEETDHQK.[N]	1.20723e-05	1.93435e-05	4	26	35	CAA91196.1; XP_005251037.1; EAW82172.1; XP_011515432.1	CAA91196.1 [2330-2339]; XP_005251037.1 [2198-2207]; EAW82172.1 [2220-2229]; XP_011515432.1 [2198-2207]		0	1240.62	1.071	0.645692	131.3	84	107.6	13.41	8.16	12.12	11.21	6.96
	FALSE	High	[K].LQMEAGLCEEQLNQADALLQSDVR.[L]	6.01647e-16	1.93435e-05	3	25	15	XP_005251037.1; EAW82172.1; XP_011515432.1	XP_005251037.1 [406-429]; EAW82172.1 [428-451]; XP_011515432.1 [406-429]		0	2732.29	7.305	0.902127	30.5	37.4	144.7	25	63.2	88.8	26.06	143.03
	FALSE	High	[K].LQMEAGLCEEQLNQADALLQSDVR.[L]	2.04104e-07	1.93435e-05	3	25	1	XP_005251037.1; EAW82172.1; XP_011515432.1	XP_005251037.1 [406-429]; EAW82172.1 [428-451]; XP_011515432.1 [406-429]		0	2748.28	3.428	0.610212	126.2	52.7	39.2	40.88	52.61	36.94	62.37	52.52
	FALSE	High	[K].LQNVQIALDYLR.[H]	4.36999e-05	1.93435e-05	4	26	15	CAA91196.1; XP_005251037.1; EAW82172.1; XP_011515432.1	CAA91196.1 [237-248]; XP_005251037.1 [105-116]; EAW82172.1 [127-138]; XP_011515432.1 [109-120]		0	1445.81	0.643	0.97018	111.4	114.5	119.1	4.29	0.8	1.85	10.51	2.24
	FALSE	High	[R].LRAETEQGEQQR.[Q]	0.0365253	0.00300596	4	25	4	CAA91196.1; XP_005251037.1; EAW82172.1; XP_011515432.1	CAA91196.1 [1855-1866]; XP_005251037.1 [1723-1734]; EAW82172.1 [1745-1756]; XP_011515432.1 [1723-1734]		1	1444.71	2.116	0.999517	80.1	99.2	118.5	39.92	46.02	15.51	30.59	40.48
	FALSE	High	[R].LREQLQLLEEQHR.[A]	6.76095e-05	1.93435e-05	3	25	5	CAA91196.1; XP_005251037.1; XP_011515432.1	CAA91196.1 [2731-2743]; XP_005251037.1 [2599-2611]; XP_011515432.1 [2599-2611]		1	1691.92	0.374	0.112721	52	78.6	307.6	14.31	14.7	7.41	60.2	11.53
	FALSE	High	[R].LRIEEEIR.[V]	0.0156676	0.00137497	4	25	16	CAA91196.1; XP_005251037.1; EAW82172.1; XP_011515432.1	CAA91196.1 [1585-1592]; XP_005251037.1 [1453-1460]; EAW82172.1 [1475-1482]; XP_011515432.1 [1453-1460]		1	1057.6	0.707	0.992443	120.7	111.1	147.7	17.7	29.61	27.7	23.28	7.4
	FALSE	High	[R].LRLPLDK.[E]	0.10294	0.00769842	4	26	4	CAA91196.1; XP_005251037.1; EAW82172.1; XP_011515432.1	CAA91196.1 [1144-1150]; XP_005251037.1 [1012-1018]; EAW82172.1 [1034-1040]; XP_011515432.1 [1012-1018]		1	854.546	1.49	0.941175	115.9	71.6	80.1	1.52	18.01	14.88	42.21	16.66
	FALSE	High	[R].LRLPLDKEPAR.[E]	2.89324e-06	1.93435e-05	4	26	23	CAA91196.1; XP_005251037.1; EAW82172.1; XP_011515432.1	CAA91196.1 [1144-1154]; XP_005251037.1 [1012-1022]; EAW82172.1 [1034-1044]; XP_011515432.1 [1012-1022]		2	1307.78	0.646	0.351817	79.3	143.3	118.4	24.47	10.87	21.04	50.46	36.13
	FALSE	High	[R].LSAEAEK.[V]	0.0672285	0.00497574	4	26	15	CAA91196.1; XP_005251037.1; EAW82172.1; XP_011515432.1	CAA91196.1 [1180-1186]; XP_005251037.1 [1048-1054]; EAW82172.1 [1070-1076]; XP_011515432.1 [1048-1054]		0	747.388	1.197	0.965725	94.7	114	57.2	5.98	15.64	6.71	19.62	6.64
	FALSE	High	[R].LSFSGLR.[AS]	0.0722648	0.00525446	3	25	25	CAA91196.1; XP_005251037.1; XP_011515432.1	CAA91196.1 [3440-3446]; XP_005251037.1 [3308-3314]; XP_011515432.1 [3308-3314]		0	779.441	0.818	0.973865	111.4	105.9	104.5	2.87	6.24	7.53	10.35	9.41
	FALSE	High	[K].LSIYNALK.[K]	0.00306154	0.00034628	3	25	11	CAA91196.1; XP_005251037.1; XP_011515432.1	CAA91196.1 [3175-3182]; XP_005251037.1 [3043-3050]; XP_011515432.1 [3043-3050]		0	921.54	100	6.09287e-17	139.4	3	182	3.47	19.92	8.91		10.18
	FALSE	High	[R].LSVAAQEAAR.[L]	5.99451e-05	1.93435e-05	4	26	28	CAA91196.1; XP_005251037.1; EAW82172.1; XP_011515432.1	CAA91196.1 [2420-2429]; XP_005251037.1 [2288-2297]; EAW82172.1 [2310-2319]; XP_011515432.1 [2288-2297]		0	1015.55	0.895	0.998657	115.2	110.6	83.8	11.72	5.94	7.8	3.71	11.45
	FALSE	High	[K].LSVYAALQR.[Q]	0.0598493	0.00462657	3	25	1	CAA91196.1; XP_005251037.1; XP_011515432.1	CAA91196.1 [2847-2855]; XP_005251037.1 [2715-2723]; XP_011515432.1 [2715-2723]		0	1020.58	100	6.09287e-17	196.1		55.4	16.22	42.03	21.67		17.56
	FALSE	High	[R].LSVYQAMK.[K]	0.0061931	0.00069399	3	26	15	CAA91196.1; XP_005251037.1; XP_011515432.1	CAA91196.1 [4084-4091]; XP_005251037.1 [3952-3959]; XP_011515432.1 [3952-3959]		0	939.497	0.968	0.781045	80.9	114.3	112.9	1.54	4.94	8.24	8.92	0.23
	FALSE	High	[R].LSYTQLLR.[R]	0.00352363	0.000427246	2	25	21	XP_005251037.1; XP_011515432.1	XP_005251037.1 [3860-3867]; XP_011515432.1 [3860-3867]		0	993.573	0.86	0.98407	108.6	95.4	124	9.59	5.7	3.19	21.84	9.23
	FALSE	High	[R].LTAEDLFEAR.[I]	0.000100918	1.93435e-05	2	25	13	XP_005251037.1; XP_011515432.1	XP_005251037.1 [3652-3661]; XP_011515432.1 [3652-3661]		0	1164.59	0.809	0.936122	119.9	110.6	95.8	2.03	3.04	1.02	1.69	2.66
	FALSE	High	[R].LTVDEAVR.[AK]	0.00673302	0.000722819	3	26	30	CAA91196.1; XP_005251037.1; XP_011515432.1	CAA91196.1 [3213-3220]; [3879-3886]; XP_005251037.1 [3081-3088]; [3747-3754]; XP_011515432.1 [3081-3088]; [3747-3754]		0	902.494	0.936	0.940651	107.8	93.8	98.6	6.74	2.66	1.79	8.3	3.15
	FALSE	High	[RK].LTVEEAVR.[HM]	0.0108331	0.000986687	4	56	27	CAA91196.1; XP_005251037.1; XP_006710598.1; XP_011515432.1	CAA91196.1 [4122-4129]; XP_005251037.1 [3990-3997]; XP_006710598.1 [1779-1786]; XP_011515432.1 [3990-3997]		0	916.51	0.853	0.850012	135.1	95.9	99.7	12.28	1.6	6.15	14.21	3.6
	FALSE	High	[R].LTVNEAVK.[E]	0.00284656	0.000304168	3	25	14	CAA91196.1; XP_005251037.1; XP_011515432.1	CAA91196.1 [2885-2892]; XP_005251037.1 [2753-2760]; XP_011515432.1 [2753-2760]		0	873.504	1.362	0.403053	136.1	67.3	95	15.4	5.53	5.7	4.77	10.94
	FALSE	High	[R].LVASMEEAR.[R]	0.000650131	6.84312e-05	3	25	18	CAA91196.1; XP_005251037.1; XP_011515432.1	CAA91196.1 [2685-2693]; XP_005251037.1 [2553-2561]; XP_011515432.1 [2553-2561]		0	1005.5	1.095	0.82098	170.7	104.8	52.3	41.33	22.6	10.02	34.49	22.21
	FALSE	High	[R].LYVHEAVK.[A]	0.00303198	0.00034628	3	25	15	CAA91196.1; XP_005251037.1; XP_011515432.1	CAA91196.1 [3544-3551]; XP_005251037.1 [3412-3419]; XP_011515432.1 [3412-3419]		0	958.536	1.102	0.998309	88.3	96.2	123	28.88	22.17	17.77	19.01	14.47
	FALSE	High	[R].MGIVGPEFK.[D]	0.00817022	0.000772347	3	26	22	CAA91196.1; XP_005251037.1; XP_011515432.1	CAA91196.1 [4130-4138]; XP_005251037.1 [3998-4006]; XP_011515432.1 [3998-4006]		0	977.512	0.947	6.09287e-17	101	111.2	150.5	49.81	64.1		33.14	23.99
	FALSE	High	[K].MQAVQEATR.[L]	0.000926249	9.10162e-05	4	25	7	CAA91196.1; XP_005251037.1; EAW82172.1; XP_011515432.1	CAA91196.1 [2453-2461]; XP_005251037.1 [2321-2329]; EAW82172.1 [2343-2351]; XP_011515432.1 [2321-2329]		0	1033.51	0.88	6.09287e-17		146.2	126.7	13.53	23.51		4.29	2.29
	FALSE	High	[K].MQAVQEATR.[L]	0.00238935	0.000195525	4	25	5	CAA91196.1; XP_005251037.1; EAW82172.1; XP_011515432.1	CAA91196.1 [2453-2461]; XP_005251037.1 [2321-2329]; EAW82172.1 [2343-2351]; XP_011515432.1 [2321-2329]		0	1049.5	0.422	0.000879656	69.3	106.2	134.9	66.9	0.71	79.55	86.09	20.83
	FALSE	High	[R].MQEEVVR.[R]	0.0393666	0.00324965	3	24	21	XP_005251037.1; EAW82172.1; XP_011515432.1	XP_005251037.1 [1402-1408]; EAW82172.1 [1424-1430]; XP_011515432.1 [1402-1408]		0	890.44	0.897	0.944028	130.3	92.1	94.3	19.47	7.11	15.86	7.31	4.78
	FALSE	High	[R].MQEEVVR.[R]	0.0718641	0.00524065	3	24	3	XP_005251037.1; EAW82172.1; XP_011515432.1	XP_005251037.1 [1402-1408]; EAW82172.1 [1424-1430]; XP_011515432.1 [1402-1408]		0	906.435	0.01	0.0199932	159.2	148.4	117.2		26.72	40.96	119.62	15.81
	FALSE	High	[K].MSAAQALK.[K]	0.0121796	0.00109357	3	26	18	CAA91196.1; XP_005251037.1; XP_011515432.1	CAA91196.1 [4505-4512]; XP_005251037.1 [4373-4380]; XP_011515432.1 [4373-4380]		0	819.439	0.803	0.941529	151	93.6	86.4	16.39	14.35	14.77	14.01	16.64
	FALSE	High	[R].MVEGYQGLR.[C]	0.000163769	4.2772e-05	4	26	33	CAA91196.1; XP_005251037.1; EAW82172.1; XP_011515432.1	CAA91196.1 [308-316]; XP_005251037.1 [176-184]; EAW82172.1 [198-206]; XP_011515432.1 [180-188]		0	1052.52	0.897	0.954296	102.5	97.9	132.9	9.19	4.29	5.02	18.55	6.11
	FALSE	High	[R].MVEGYQGLR.[C]	0.0111686	0.000986687	4	26	4	CAA91196.1; XP_005251037.1; EAW82172.1; XP_011515432.1	CAA91196.1 [308-316]; XP_005251037.1 [176-184]; EAW82172.1 [198-206]; XP_011515432.1 [180-188]		0	1068.51
	FALSE	High	[R].NDDIADGNPK.[L]	0.00271156	0.000282962	4	25	8	CAA91196.1; XP_005251037.1; EAW82172.1; XP_011515432.1	CAA91196.1 [259-268]; XP_005251037.1 [127-136]; EAW82172.1 [149-158]; XP_011515432.1 [131-140]		0	1058.47	0.01	6.09287e-17		293.8			132.57		17.47
	FALSE	High	[R].NLVDNITGQR.[L]	0.000295895	4.2772e-05	3	26	19	CAA91196.1; XP_005251037.1; XP_011515432.1	CAA91196.1 [4438-4447]; XP_005251037.1 [4306-4315]; XP_011515432.1 [4306-4315]		0	1129.6	0.78	0.994224	108.3	110.6	101.8	3.31	5.16	3	7.99	7.77
	FALSE	High	[K].QAADAEMEK.[H]	0.000992017	0.000139161	4	26	32	CAA91196.1; XP_005251037.1; EAW82172.1; XP_011515432.1	CAA91196.1 [2298-2306]; XP_005251037.1 [2166-2174]; EAW82172.1 [2188-2196]; XP_011515432.1 [2166-2174]		0	992.435	0.648	0.837349	96.1	114.7	107.1	45.54	34.14	19.16	14.03	17.23
	FALSE	High	[K].QAEEIGEK.[L]	0.00625417	0.000710402	4	25	18	CAA91196.1; XP_005251037.1; EAW82172.1; XP_011515432.1	CAA91196.1 [2546-2553]; XP_005251037.1 [2414-2421]; EAW82172.1 [2436-2443]; XP_011515432.1 [2414-2421]		0	903.442	0.747	0.984003	132.3	108.7	92.8	10.45	7.03	11.03	26.23	26.99
	FALSE	High	[R].QAEVELASR.[V]	0.0112828	0.00100559	4	25	7	CAA91196.1; XP_005251037.1; EAW82172.1; XP_011515432.1	CAA91196.1 [1649-1657]; XP_005251037.1 [1517-1525]; EAW82172.1 [1539-1547]; XP_011515432.1 [1517-1525]		0	985.495	2.47	0.990868	74.3	82.9	40.9	56.46	57.23	14.49	32.81	10.09
	FALSE	High	[R].QAEVELASR.[V]	0.000659817	9.10162e-05	4	25	16	CAA91196.1; XP_005251037.1; EAW82172.1; XP_011515432.1	CAA91196.1 [1649-1657]; XP_005251037.1 [1517-1525]; EAW82172.1 [1539-1547]; XP_011515432.1 [1517-1525]		0	1002.52	1.059	0.17461	181.8	62.2	78.5	15.93	9.41	8.01	5.53	10.38
	FALSE	High	[R].QALHSLELHYQAFLR.[D]	2.45261e-05	1.93435e-05	4	26	3	CAA91196.1; XP_005251037.1; EAW82172.1; XP_011515432.1	CAA91196.1 [1061-1075]; XP_005251037.1 [929-943]; EAW82172.1 [951-965]; XP_011515432.1 [929-943]		0	1808.94	0.75	0.376247	177.8	79	63.3	17.1	25.28	3.95	20.62	7.58
	FALSE	High	[K].QEELQQLEQQR.[R]	0.000146765	4.2772e-05	3	25	2	CAA91196.1; XP_005251037.1; XP_011515432.1	CAA91196.1 [2707-2717]; XP_005251037.1 [2575-2585]; XP_011515432.1 [2575-2585]		0	1411.68	0.759	0.383803	76.5	142.4	124.2	33.81	0.83	4.91	77.31	7.3
	FALSE	High	[K].QEELQQLEQQR.[R]	6.96664e-07	1.93435e-05	3	25	11	CAA91196.1; XP_005251037.1; XP_011515432.1	CAA91196.1 [2707-2717]; XP_005251037.1 [2575-2585]; XP_011515432.1 [2575-2585]		0	1428.71	0.958	0.985512	126.3	100.1	65	8.43	11.43	3.09	15.76	41.31
	FALSE	High	[R].QEELYSELQAR.[E]	3.85409e-06	1.93435e-05	2	24	14	XP_005251037.1; XP_011515432.1	XP_005251037.1 [3226-3236]; XP_011515432.1 [3226-3236]		0	1365.66	1.109	0.590742	149.7	84.2	65.2	11.56	7.09	9.01	10.05	13.12
	FALSE	High	[R].QELEAELAK.[V]	0.00098717	0.000139161	4	25	10	CAA91196.1; XP_005251037.1; EAW82172.1; XP_011515432.1	CAA91196.1 [1888-1896]; XP_005251037.1 [1756-1764]; EAW82172.1 [1778-1786]; XP_011515432.1 [1756-1764]		0	1030.54	0.97	0.740194	143.5	80.8	91.2	6.63	2.68	3.25	9.12	4.95
	FALSE	High	[R].QEQALLEEIER.[H]	4.83141e-05	1.93435e-05	4	26	13	CAA91196.1; XP_005251037.1; EAW82172.1; XP_011515432.1	CAA91196.1 [1387-1397]; XP_005251037.1 [1255-1265]; EAW82172.1 [1277-1287]; XP_011515432.1 [1255-1265]		0	1340.67	0.939	0.950447	126.3	102.3	76.5	13.32	12.04	6.32	4.15	8.74
	FALSE	High	[R].QEQALLEEIER.[H]	8.02058e-07	1.93435e-05	4	26	10	CAA91196.1; XP_005251037.1; EAW82172.1; XP_011515432.1	CAA91196.1 [1387-1397]; XP_005251037.1 [1255-1265]; EAW82172.1 [1277-1287]; XP_011515432.1 [1255-1265]		0	1357.7	1.222	0.940227	115.2	82.9	80.3	17.31	1.57	6.24	6.77	5.12
	FALSE	High	[R].QEQIQAMPLADSQAVR.[E]	1.19676e-10	1.93435e-05	4	26	21	CAA91196.1; XP_005251037.1; EAW82172.1; XP_011515432.1	CAA91196.1 [1367-1382]; XP_005251037.1 [1235-1250]; EAW82172.1 [1257-1272]; XP_011515432.1 [1235-1250]		0	1784.9	0.94	0.46019	161	80.3	75.3	11.79	6.37	4.94	20.84	0.34
	FALSE	High	[R].QHEAEEGVR.[R]	0.000297367	4.2772e-05	3	25	19	CAA91196.1; XP_005251037.1; XP_011515432.1	CAA91196.1 [2696-2704]; XP_005251037.1 [2564-2572]; XP_011515432.1 [2564-2572]		0	1037.46	0.928	0.964536	112	121.7	87.4	13.96	33.14	24.63	38.23	34.14
	FALSE	High	[R].QHEAEEGVR.[R]	0.0232891	0.00177699	3	25	4	CAA91196.1; XP_005251037.1; XP_011515432.1	CAA91196.1 [2696-2704]; XP_005251037.1 [2564-2572]; XP_011515432.1 [2564-2572]		0	1054.49	4.996	4.77377e-05	174.6	28	97	8.25	48.45	31.87	48.32	42.71
	FALSE	High	[R].QLAAEEER.[R]	0.0395783	0.00326561	4	26	6	CAA91196.1; XP_005251037.1; EAW82172.1; XP_011515432.1	CAA91196.1 [2111-2118]; XP_005251037.1 [1979-1986]; EAW82172.1 [2001-2008]; XP_011515432.1 [1979-1986]		0	928.437	1.355	0.951062	75.4	80.8	182.9	20.5	19.99	0.31	26.66	28.55
	FALSE	High	[R].QLAAEEER.[R]	0.0105617	0.000951775	4	26	22	CAA91196.1; XP_005251037.1; EAW82172.1; XP_011515432.1	CAA91196.1 [2111-2118]; XP_005251037.1 [1979-1986]; EAW82172.1 [2001-2008]; XP_011515432.1 [1979-1986]		0	945.464	1.213	0.97439	112.7	118.4	86.2	17.52	28.43	23.74	22.65	22.18
	FALSE	High	[R].QLAEAHAQAK.[A]	6.46272e-05	1.93435e-05	4	25	8	CAA91196.1; XP_005251037.1; EAW82172.1; XP_011515432.1	CAA91196.1 [1511-1520]; XP_005251037.1 [1379-1388]; EAW82172.1 [1401-1410]; XP_011515432.1 [1379-1388]		0	1049.54	0.01	0.997694	112	101	103.5		20.31	4.92	15.49	14.59
	FALSE	High	[R].QLAEAHAQAK.[A]	5.39525e-05	1.93435e-05	4	25	46	CAA91196.1; XP_005251037.1; EAW82172.1; XP_011515432.1	CAA91196.1 [1511-1520]; XP_005251037.1 [1379-1388]; EAW82172.1 [1401-1410]; XP_011515432.1 [1379-1388]		0	1066.56	0.632	0.981819	105.7	95.9	114.8	1.08	25.38	4.46	32.1	9.73
	FALSE	High	[R].QLAEEDAAR.[Q]	0.00592592	0.000634693	4	26	8	CAA91196.1; XP_005251037.1; EAW82172.1; XP_011515432.1	CAA91196.1 [1955-1963]; XP_005251037.1 [1823-1831]; EAW82172.1 [1845-1853]; XP_011515432.1 [1823-1831]		0	985.459	1.046	0.742346	135.4	75	101.8	10.9	8.2	8.55	25.43	7.19
	FALSE	High	[R].QLAEEDAAR.[Q]	0.000446542	4.2772e-05	4	26	26	CAA91196.1; XP_005251037.1; EAW82172.1; XP_011515432.1	CAA91196.1 [1955-1963]; XP_005251037.1 [1823-1831]; EAW82172.1 [1845-1853]; XP_011515432.1 [1823-1831]		0	1002.49	1.048	0.978903	110.4	90.9	107.6	13.91	15.11	10.37	3.28	5.49
	FALSE	High	[R].QLAEEDLAQQR.[A]	9.8919e-05	1.93435e-05	4	26	8	CAA91196.1; XP_005251037.1; EAW82172.1; XP_011515432.1	CAA91196.1 [2432-2442]; XP_005251037.1 [2300-2310]; EAW82172.1 [2322-2332]; XP_011515432.1 [2300-2310]		0	1283.62	1.108	0.869204	114.3	93	105.2	9.89	6.95	9.3	3.94	5.49
	FALSE	High	[R].QLAEEDLAQQR.[A]	2.01405e-06	1.93435e-05	4	26	41	CAA91196.1; XP_005251037.1; EAW82172.1; XP_011515432.1	CAA91196.1 [2432-2442]; XP_005251037.1 [2300-2310]; EAW82172.1 [2322-2332]; XP_011515432.1 [2300-2310]		0	1300.65	0.895	0.811516	89	110.8	106.4	6.32	4.95	6.67	5.55	3.62
	FALSE	High	[R].QLAEGTAQQR.[L]	0.00183625	0.000154191	4	25	11	CAA91196.1; XP_005251037.1; EAW82172.1; XP_011515432.1	CAA91196.1 [1836-1845]; XP_005251037.1 [1704-1713]; EAW82172.1 [1726-1735]; XP_011515432.1 [1704-1713]		0	1084.54	0.656	0.980806	123.1	110.4	95.5	19.9	36.6	2.74	20.24	13.92
	FALSE	High	[R].QLAEGTAQQR.[L]	3.10587e-05	1.93435e-05	4	25	37	CAA91196.1; XP_005251037.1; EAW82172.1; XP_011515432.1	CAA91196.1 [1836-1845]; XP_005251037.1 [1704-1713]; EAW82172.1 [1726-1735]; XP_011515432.1 [1704-1713]		0	1101.56	0.833	0.998309	112	105.3	102.6	11.2	13.46	6.59	27.48	27.13
	FALSE	High	[R].QLEMSAEAER.[L]	0.00258287	0.000217647	4	25	2	CAA91196.1; XP_005251037.1; EAW82172.1; XP_011515432.1	CAA91196.1 [2512-2521]; XP_005251037.1 [2380-2389]; EAW82172.1 [2402-2411]; XP_011515432.1 [2380-2389]		0	1146.51	0.784	0.981348	116.6	105.5	103.5	14.26	2.14	6.19	2.13	5.65
	FALSE	Medium	[R].QLEMSAEAER.[L]	0.407477	0.0320978	4	25	1	CAA91196.1; XP_005251037.1; EAW82172.1; XP_011515432.1	CAA91196.1 [2512-2521]; XP_005251037.1 [2380-2389]; EAW82172.1 [2402-2411]; XP_011515432.1 [2380-2389]		0	1162.5
	FALSE	High	[R].QLEMSAEAER.[L]	7.21607e-05	1.93435e-05	4	25	17	CAA91196.1; XP_005251037.1; EAW82172.1; XP_011515432.1	CAA91196.1 [2512-2521]; XP_005251037.1 [2380-2389]; EAW82172.1 [2402-2411]; XP_011515432.1 [2380-2389]		0	1163.54	0.787	0.91885	101.4	114.9	109.4	22.03	7.29	4.32	8.94	4.97
	FALSE	High	[R].QLEMSAEAER.[L]	0.000693142	9.10162e-05	4	25	4	CAA91196.1; XP_005251037.1; EAW82172.1; XP_011515432.1	CAA91196.1 [2512-2521]; XP_005251037.1 [2380-2389]; EAW82172.1 [2402-2411]; XP_011515432.1 [2380-2389]		0	1179.53		6.09287e-17	156.5		132.8			26.64		51.74
	FALSE	High	[R].QLLEEELAR.[L]	0.00179197	0.000154191	4	25	7	CAA91196.1; XP_005251037.1; EAW82172.1; XP_011515432.1	CAA91196.1 [1867-1875]; XP_005251037.1 [1735-1743]; EAW82172.1 [1757-1765]; XP_011515432.1 [1735-1743]		0	1083.57	0.731	0.946542	139.8	137.5	6.1	49.32	44.59	75.22	13.44	153.75
	FALSE	High	[R].QLLEEELAR.[L]	0.000338314	4.2772e-05	4	25	8	CAA91196.1; XP_005251037.1; EAW82172.1; XP_011515432.1	CAA91196.1 [1867-1875]; XP_005251037.1 [1735-1743]; EAW82172.1 [1757-1765]; XP_011515432.1 [1735-1743]		0	1100.59	0.936	0.965443	119.2	100	96.6	4.95	6.53	4.81	13.14	5.29
	FALSE	High	[R].QLLSPGTALILLEAQAASGFLLDPVR.[N]	9.92146e-09	1.93435e-05	3	25	15	CAA91196.1; XP_005251037.1; XP_011515432.1	CAA91196.1 [2856-2881]; XP_005251037.1 [2724-2749]; XP_011515432.1 [2724-2749]		0	2676.5	0.069	0.824317	154.9	97.4	109.5		36.37	34.76	22.89	9.24
	FALSE	High	[R].QLLSPGTALILLEAQAASGFLLDPVR.[N]	4.72429e-13	1.93435e-05	3	25	10	CAA91196.1; XP_005251037.1; XP_011515432.1	CAA91196.1 [2856-2881]; XP_005251037.1 [2724-2749]; XP_011515432.1 [2724-2749]		0	2693.52	0.01	0.333259	109.3	169.3	122.3		71.15	52.8	53.51	70.34
	FALSE	High	[R].QLQLAQEAAQK.[R]	1.4911e-05	1.93435e-05	4	26	13	CAA91196.1; XP_005251037.1; EAW82172.1; XP_011515432.1	CAA91196.1 [2172-2182]; XP_005251037.1 [2040-2050]; EAW82172.1 [2062-2072]; XP_011515432.1 [2040-2050]		0	1227.67	0.686	0.770481	156.7	86.3	103.6	10.63	8.23	10.72	6.58	13.69
	FALSE	High	[K].QITMEELVR.[S]	0.00158606	0.000154191	3	26	6	CAA91196.1; XP_005251037.1; XP_011515432.1	CAA91196.1 [4028-4036]; XP_005251037.1 [3896-3904]; XP_011515432.1 [3896-3904]		0	1101.56	0.934	0.963403	127.7	98.8	93.6	7.93	9.12	7.12	10.65	5.82
	FALSE	High	[K].QITMEELVR.[S]	0.000323542	4.2772e-05	3	26	15	CAA91196.1; XP_005251037.1; XP_011515432.1	CAA91196.1 [4028-4036]; XP_005251037.1 [3896-3904]; XP_011515432.1 [3896-3904]		0	1118.59	0.948	0.88519	133.2	94.4	87.4	17.13	7.61	4.3	11.81	13.18
	FALSE	High	[R].QQEELLAEENQR.[L]	2.23848e-06	1.93435e-05	3	25	5	CAA91196.1; XP_005251037.1; XP_011515432.1	CAA91196.1 [2719-2730]; XP_005251037.1 [2587-2598]; XP_011515432.1 [2587-2598]		0	1469.69	3.873	1.9445e-06	204.5	25.5	88.3	65.25	10.85	12.27	45.03
	FALSE	High	[R].QQEELLAEENQR.[L]	5.68623e-08	1.93435e-05	3	25	33	CAA91196.1; XP_005251037.1; XP_011515432.1	CAA91196.1 [2719-2730]; XP_005251037.1 [2587-2598]; XP_011515432.1 [2587-2598]		0	1486.71	0.856	0.92891	128.8	93.7	93.3	11.83	15.11	4.84	6.36	6.07
	FALSE	High	[R].QQGLASYDYVR.[R]	0.00455546	0.000502794	3	26	4	CAA91196.1; XP_005251037.1; XP_011515432.1	CAA91196.1 [3771-3781]; XP_005251037.1 [3639-3649]; XP_011515432.1 [3639-3649]		0	1282.61	2.123	0.48864	112	89.8	141.1	54.68	9.75	12.24	79.82	12.44
	FALSE	High	[R].QQGLASYDYVR.[R]	6.21537e-06	1.93435e-05	3	26	15	CAA91196.1; XP_005251037.1; XP_011515432.1	CAA91196.1 [3771-3781]; XP_005251037.1 [3639-3649]; XP_011515432.1 [3639-3649]		0	1299.63	0.763	0.960442	125.5	100.8	108.5	4.41	0.99	3.69	11.01	3.47
	FALSE	High	[R].QQQQMEQER.[Q]	0.00226469	0.000195525	3	25	10	CAA91196.1; XP_005251037.1; XP_011515432.1	CAA91196.1 [2674-2682]; XP_005251037.1 [2542-2550]; XP_011515432.1 [2542-2550]		0	1187.51	1.729	0.556437	137.3	62.6	79.1	12.79	7.17	7.8	26.14	6.36
	FALSE	High	[R].QQQQMEQER.[Q]	0.00029443	4.2772e-05	3	25	36	CAA91196.1; XP_005251037.1; XP_011515432.1	CAA91196.1 [2674-2682]; XP_005251037.1 [2542-2550]; XP_011515432.1 [2542-2550]		0	1204.54	0.71	0.993552	109.4	104.4	103.2	5.71	23.17	20.66	1.23	6.41
	FALSE	High	[R].QRELAEQELEK.[Q]	0.129764	0.00940438	4	25	1	CAA91196.1; XP_005251037.1; EAW82172.1; XP_011515432.1	CAA91196.1 [1823-1833]; XP_005251037.1 [1691-1701]; EAW82172.1 [1713-1723]; XP_011515432.1 [1691-1701]		1	1372.71
	FALSE	High	[K].QRLEAEAGR.[F]	0.00286042	0.000304168	4	26	8	CAA91196.1; XP_005251037.1; EAW82172.1; XP_011515432.1	CAA91196.1 [1924-1932]; XP_005251037.1 [1792-1800]; EAW82172.1 [1814-1822]; XP_011515432.1 [1792-1800]		1	1029.54	0.611	0.230848	64.9	137.1	169.3	35.44	43.67	12.79	6.73	52.57
	FALSE	High	[K].QSAEEQAQAR.[A]	0.0011545	0.000154191	4	26	6	CAA91196.1; XP_005251037.1; EAW82172.1; XP_011515432.1	CAA91196.1 [2256-2265]; XP_005251037.1 [2124-2133]; EAW82172.1 [2146-2155]; XP_011515432.1 [2124-2133]		0	1100.5	1.05	0.881613	132.4	112.4	67.7	73.88	31.21	10.29	37.68
	FALSE	High	[K].QSAEEQAQAR.[A]	2.56608e-05	1.93435e-05	4	26	32	CAA91196.1; XP_005251037.1; EAW82172.1; XP_011515432.1	CAA91196.1 [2256-2265]; XP_005251037.1 [2124-2133]; EAW82172.1 [2146-2155]; XP_011515432.1 [2124-2133]		0	1117.52	0.463	0.659287	104.1	141.5	69.1	3.44	30.87	17.03	34.43	11.2
	FALSE	High	[R].QSSEAEIQAK.[A]	0.00207444	0.000195525	4	25	4	CAA91196.1; XP_005251037.1; EAW82172.1; XP_011515432.1	CAA91196.1 [1564-1573]; XP_005251037.1 [1432-1441]; EAW82172.1 [1454-1463]; XP_011515432.1 [1432-1441]		0	1073.51	1.267	0.948146	114.1	84.2	101.2	14.38	23.59	11.84	65.86	20.94
	FALSE	High	[R].QSSEAEIQAK.[A]	0.000118421	1.93435e-05	4	25	28	CAA91196.1; XP_005251037.1; EAW82172.1; XP_011515432.1	CAA91196.1 [1564-1573]; XP_005251037.1 [1432-1441]; EAW82172.1 [1454-1463]; XP_011515432.1 [1432-1441]		0	1090.54	1.109	0.984003	109.2	124.9	92.4	19.47	26.26	25.1	20.37	21.85
	FALSE	High	[R].QTLSIYQALK.[K]	0.000320347	4.2772e-05	3	26	9	CAA91196.1; XP_005251037.1; XP_011515432.1	CAA91196.1 [3839-3848]; XP_005251037.1 [3707-3716]; XP_011515432.1 [3707-3716]		0	1164.66	0.657	0.937562	134.2	97.8	105.8	15.84	3.51	13.56	4.17	6.37
	FALSE	High	[R].QTNLENLDQAFSVAER.[D]	3.11882e-09	1.93435e-05	4	26	4	CAA91196.1; XP_005251037.1; EAW82172.1; XP_011515432.1	CAA91196.1 [350-365]; XP_005251037.1 [218-233]; EAW82172.1 [240-255]; XP_011515432.1 [222-237]		0	1817.87
	FALSE	High	[R].QTNLENLDQAFSVAER.[D]	4.76568e-11	1.93435e-05	4	26	19	CAA91196.1; XP_005251037.1; EAW82172.1; XP_011515432.1	CAA91196.1 [350-365]; XP_005251037.1 [218-233]; EAW82172.1 [240-255]; XP_011515432.1 [222-237]		0	1834.89	0.942	0.853726	138.4	89.5	79.4	3.25	4.1	5.2	6.64	4.95
	FALSE	High	[K].QVAEEAAR.[L]	0.129764	0.00940438	4	26	4	CAA91196.1; XP_005251037.1; EAW82172.1; XP_011515432.1	CAA91196.1 [2412-2419]; XP_005251037.1 [2280-2287]; EAW82172.1 [2302-2309]; XP_011515432.1 [2280-2287]		0	856.416	1.436	0.753803	136.7	75.2	100.4	3.47	4.75	11.36	1.82	0.85
	FALSE	High	[K].QVAEEAAR.[L]	0.0120558	0.00109357	4	26	33	CAA91196.1; XP_005251037.1; EAW82172.1; XP_011515432.1	CAA91196.1 [2412-2419]; XP_005251037.1 [2280-2287]; EAW82172.1 [2302-2309]; XP_011515432.1 [2280-2287]		0	873.442	0.701	0.761937	100	126.7	90.5	6.04	11.97	7.85	23.45	16.06
	FALSE	High	[R].QVEEEILALK.[A]	5.5046e-05	1.93435e-05	4	26	12	CAA91196.1; XP_005251037.1; EAW82172.1; XP_011515432.1	CAA91196.1 [2059-2068]; XP_005251037.1 [1927-1936]; EAW82172.1 [1949-1958]; XP_011515432.1 [1927-1936]		0	1154.63	0.812	0.973883	141.9	145.7		8.96	2.07	0.7	2.54
	FALSE	High	[R].QVEEEILALK.[A]	0.00572646	0.000615159	4	26	1	CAA91196.1; XP_005251037.1; EAW82172.1; XP_011515432.1	CAA91196.1 [2059-2068]; XP_005251037.1 [1927-1936]; EAW82172.1 [1949-1958]; XP_011515432.1 [1927-1936]		0	1171.66	0.972	0.989403	106.3	108.3	77.9	4.68	2.21	2.45	8.24	6.71
	FALSE	High	[K].QVEVTVHK.[G]	0.0184013	0.00154512	4	26	9	CAA91196.1; XP_005251037.1; EAW82172.1; XP_011515432.1	CAA91196.1 [954-961]; XP_005251037.1 [822-829]; EAW82172.1 [844-851]; XP_011515432.1 [822-829]		0	922.499	1.357	6.09287e-17		115.3	56.8	7.2	10.32		34.13	17.71
	FALSE	High	[K].QVEVTVHK.[G]	0.00663423	0.000722819	4	26	11	CAA91196.1; XP_005251037.1; EAW82172.1; XP_011515432.1	CAA91196.1 [954-961]; XP_005251037.1 [822-829]; EAW82172.1 [844-851]; XP_011515432.1 [822-829]		0	939.526	1.199	0.980751	145.4	93.3	45.1	7.98	17.18	15.25	49.82	16.33
	FALSE	High	[K].QVEVTVHKGDECQLVGPAQPSHWK.[V]	5.67575e-09	1.93435e-05	4	26	5	CAA91196.1; XP_005251037.1; EAW82172.1; XP_011515432.1	CAA91196.1 [954-977]; XP_005251037.1 [822-845]; EAW82172.1 [844-867]; XP_011515432.1 [822-845]		1	2713.3	0.385	0.982219	135.9	111.8	137.9	15.33	27.94	18.78	22.75	10.51
	FALSE	High	[K].QVEVTVHKGDECQLVGPAQPSHWK.[V]	3.8071e-10	1.93435e-05	4	26	5	CAA91196.1; XP_005251037.1; EAW82172.1; XP_011515432.1	CAA91196.1 [954-977]; XP_005251037.1 [822-845]; EAW82172.1 [844-867]; XP_011515432.1 [822-845]		1	2730.33	0.217	0.992531	30.1	83.7	39		18.43	11.81	114.31	31.84
	FALSE	High	[R].QVQDESQR.[K]	0.0776816	0.00575757	4	25	2	CAA91196.1; XP_005251037.1; EAW82172.1; XP_011515432.1	CAA91196.1 [1639-1646]; XP_005251037.1 [1507-1514]; EAW82172.1 [1529-1536]; XP_011515432.1 [1507-1514]		0	972.438	0.988	0.983939	150.7	128.9		15.97	12.64	7.14	3.61
	FALSE	High	[R].QVQVALETAQR.[S]	0.00833516	0.000772347	4	25	1	CAA91196.1; XP_005251037.1; EAW82172.1; XP_011515432.1	CAA91196.1 [1699-1709]; XP_005251037.1 [1567-1577]; EAW82172.1 [1589-1599]; XP_011515432.1 [1567-1577]		0	1225.65	0.66	6.09287e-17	50.3	127	131.3	26.12	28		14.94
	FALSE	High	[R].QVQVALETAQR.[S]	1.58992e-06	1.93435e-05	4	25	22	CAA91196.1; XP_005251037.1; EAW82172.1; XP_011515432.1	CAA91196.1 [1699-1709]; XP_005251037.1 [1567-1577]; EAW82172.1 [1589-1599]; XP_011515432.1 [1567-1577]		0	1242.68	0.851	0.741019	154.2	76.1	101.8	13.97	9.05	9.18	11.03	4.6
	FALSE	High	[R].QYDIDDAIAK.[N]	0.000787731	9.10162e-05	3	26	6	CAA91196.1; XP_005251037.1; XP_011515432.1	CAA91196.1 [4339-4348]; XP_005251037.1 [4207-4216]; XP_011515432.1 [4207-4216]		0	1134.53	0.722	0.991475	116	116.7	101.9	9.66	7.99	2.48	9.83	4.73
	FALSE	High	[R].QYDIDDAIAK.[N]	0.000184552	4.2772e-05	3	26	16	CAA91196.1; XP_005251037.1; XP_011515432.1	CAA91196.1 [4339-4348]; XP_005251037.1 [4207-4216]; XP_011515432.1 [4207-4216]		0	1151.56	0.768	0.98585	114.3	109.3	99	9.41	4.75	5.65	8.02	3.54
	FALSE	High	[R].RAAEEAEEAR.[V]	0.00106239	0.000139161	4	26	2	CAA91196.1; XP_005251037.1; EAW82172.1; XP_011515432.1	CAA91196.1 [2225-2234]; XP_005251037.1 [2093-2102]; EAW82172.1 [2115-2124]; XP_011515432.1 [2093-2102]		1	1131.54		6.09287e-17	114.5		385.5			9.7		14.6
	FALSE	High	[R].RDDGTGQLLLPLSDAR.[K]	3.32515e-07	1.93435e-05	2	25	6	XP_005251037.1; XP_011515432.1	XP_005251037.1 [3871-3886]; XP_011515432.1 [3871-3886]		1	1726.91	0.823	0.88519	137.5	89.5	103.1	17.27	11.12	5.49	11.58	2.57
	FALSE	High	[R].REEAAVDAQQQK.[R]	4.21015e-10	1.93435e-05	4	25	51	CAA91196.1; XP_005251037.1; EAW82172.1; XP_011515432.1	CAA91196.1 [1541-1552]; XP_005251037.1 [1409-1420]; EAW82172.1 [1431-1442]; XP_011515432.1 [1409-1420]		1	1372.68	0.81	0.800919	101	117	95.2	19.59	20.54	10.43	19.18	5.43
	FALSE	High	[R].RFPSSFEEIEILWSQFLK.[F]	1.16703e-10	1.93435e-05	4	26	4	CAA91196.1; XP_005251037.1; EAW82172.1; XP_011515432.1	CAA91196.1 [443-460]; XP_005251037.1 [311-328]; EAW82172.1 [333-350]; XP_011515432.1 [311-328]		1	2256.17	0.01	0.158447	86	193.7	93.3		36.87	45.98	28.31	78.26
	FALSE	High	[R].RKQEELQQLEQQR.[R]	5.44965e-05	1.93435e-05	3	25	5	CAA91196.1; XP_005251037.1; XP_011515432.1	CAA91196.1 [2705-2717]; XP_005251037.1 [2573-2585]; XP_011515432.1 [2573-2585]		2	1712.9	0.01	6.09287e-17		143.6	356.4				44.89	14.17
	FALSE	High	[R].RLAEDEAFQR.[R]	0.0455314	0.00364	4	26	3	CAA91196.1; XP_005251037.1; EAW82172.1; XP_011515432.1	CAA91196.1 [2005-2014]; XP_005251037.1 [1873-1882]; EAW82172.1 [1895-1904]; XP_011515432.1 [1873-1882]		1	1234.62		6.09287e-17	41.6		458.4					12.33
	FALSE	Medium	[R].RLEEQAAQHK.[A]	0.370543	0.0279464	4	26	1	CAA91196.1; XP_005251037.1; EAW82172.1; XP_011515432.1	CAA91196.1 [2016-2025]; XP_005251037.1 [1884-1893]; EAW82172.1 [1906-1915]; XP_011515432.1 [1884-1893]		1	1209.63
	FALSE	High	[R].RPELEDSTLR.[Y]	6.42779e-07	1.93435e-05	4	26	31	CAA91196.1; XP_005251037.1; EAW82172.1; XP_011515432.1	CAA91196.1 [651-660]; XP_005251037.1 [519-528]; EAW82172.1 [541-550]; XP_011515432.1 [519-528]		0	1215.63	1.231	0.659628	131.2	90.3	91.8	28.57	6.62	9.97	23.71	19.59
	FALSE	High	[K].RQELEAELAK.[V]	4.11456e-06	1.93435e-05	4	25	31	CAA91196.1; XP_005251037.1; EAW82172.1; XP_011515432.1	CAA91196.1 [1887-1896]; XP_005251037.1 [1755-1764]; EAW82172.1 [1777-1786]; XP_011515432.1 [1755-1764]		1	1186.64	0.732	0.96677	96.6	109.6	140.3	25	17.7	10.69	25.09	21.16
	FALSE	High	[R].RQEQIQAMPLADSQAVR.[E]	1.86432e-07	1.93435e-05	4	26	6	CAA91196.1; XP_005251037.1; EAW82172.1; XP_011515432.1	CAA91196.1 [1366-1382]; XP_005251037.1 [1234-1250]; EAW82172.1 [1256-1272]; XP_011515432.1 [1234-1250]		1	1941	0.771	0.995444	101.6	93.4	150.3	3.99	4.98	11.59	28.3	3.04
	FALSE	High	[R].RQQEELLAEENQR.[L]	2.14242e-08	1.93435e-05	3	25	17	CAA91196.1; XP_005251037.1; XP_011515432.1	CAA91196.1 [2718-2730]; XP_005251037.1 [2586-2598]; XP_011515432.1 [2586-2598]		1	1642.81	0.731	0.00304235	41.4	134	172.6	23.87	22.89	69.33	73.63	8.11
	FALSE	High	[R].RQVEEEILALK.[A]	0.00519418	0.000557966	4	26	8	CAA91196.1; XP_005251037.1; EAW82172.1; XP_011515432.1	CAA91196.1 [2058-2068]; XP_005251037.1 [1926-1936]; EAW82172.1 [1948-1958]; XP_011515432.1 [1926-1936]		1	1327.76	0.749	0.610449	79.3	108	156.3	8.19		0.11	13.08	2.49
	FALSE	High	[R].RVVIVDPETGK.[E]	0.0958592	0.00709237	3	26	2	CAA91196.1; XP_005251037.1; XP_011515432.1	CAA91196.1 [4277-4287]; XP_005251037.1 [4145-4155]; XP_011515432.1 [4145-4155]		1	1212.69	0.769	6.09287e-17	24.6	144.1	150.3	14.46	14.61		10.7	12.47
	FALSE	High	[R].RYASGSSASLGGPESAVA.[-]	3.97243e-05	1.93435e-05	3	26	11	CAA91196.1; XP_005251037.1; XP_011515432.1	CAA91196.1 [4667-4684]; XP_005251037.1 [4535-4552]; XP_011515432.1 [4535-4552]		1	1666.8	0.825	0.80271	63.8	102.1	167.7	8.89	22.56	17.13	20.39	4.28
	FALSE	High	[R].SAEAELQSK.[R]	0.000422864	4.2772e-05	4	25	20	CAA91196.1; XP_005251037.1; EAW82172.1; XP_011515432.1	CAA91196.1 [1710-1718]; XP_005251037.1 [1578-1586]; EAW82172.1 [1600-1608]; XP_011515432.1 [1578-1586]		0	962.479	0.98	0.9741	108.1	96.8	99.6	7.89	15.14	11.57	34.58	10.44
	FALSE	High	[R].SDEGQLSPATR.[G]	2.50048e-06	1.93435e-05	4	26	29	CAA91196.1; XP_005251037.1; EAW82172.1; XP_011515432.1	CAA91196.1 [714-724]; XP_005251037.1 [582-592]; EAW82172.1 [604-614]; XP_011515432.1 [582-592]		0	1160.55	1.033	0.736595	130.5	87.1	100.7	11.97	11.57	3.79	8.37	6.08
	FALSE	High	[K].SEEMQTVQQEQLLQETQALQQSFLSEK.[D]	1.5892e-09	1.93435e-05	3	23	8	CAA91196.1; XP_005251037.1; XP_011515432.1	CAA91196.1 [2610-2636]; XP_005251037.1 [2478-2504]; XP_011515432.1 [2478-2504]		0	3180.54	0.01	0.917275	138.1	158.1	96		54.61	66.12	34.83	72.41
	FALSE	High	[K].SEEMQTVQQEQLLQETQALQQSFLSEK.[D]	2.23341e-10	1.93435e-05	3	23	11	CAA91196.1; XP_005251037.1; XP_011515432.1	CAA91196.1 [2610-2636]; XP_005251037.1 [2478-2504]; XP_011515432.1 [2478-2504]		0	3196.53	2.193	0.538685	160.7	49.4	53.8	9.75	36.6	32.26	49.37	77.92
	FALSE	High	[R].SELELTLGK.[L]	0.00163322	0.000154191	4	26	14	CAA91196.1; XP_005251037.1; EAW82172.1; XP_011515432.1	CAA91196.1 [1202-1210]; XP_005251037.1 [1070-1078]; EAW82172.1 [1092-1100]; XP_011515432.1 [1070-1078]		0	989.551	0.759	0.989372	105.1	117.8	106.2	7.54	7.6	12.61	26.43	6.52
	FALSE	High	[R].SKEQAELEAAR.[Q]	4.75922e-05	1.93435e-05	4	26	46	CAA91196.1; XP_005251037.1; EAW82172.1; XP_011515432.1	CAA91196.1 [2098-2108]; XP_005251037.1 [1966-1976]; EAW82172.1 [1988-1998]; XP_011515432.1 [1966-1976]		1	1231.63	0.772	0.945216	128.9	101.6	109.6	15.02	5.88	21.5	23.02	7.14
	FALSE	High	[K].SLAAEEEAAR.[Q]	0.000100918	1.93435e-05	4	26	44	CAA91196.1; XP_005251037.1; EAW82172.1; XP_011515432.1	CAA91196.1 [2130-2139]; XP_005251037.1 [1998-2007]; EAW82172.1 [2020-2029]; XP_011515432.1 [1998-2007]		0	1046.51	1.378	0.184936	159.1	66.7	75.6	25.52	20.28	9.06	12.09	5.93
	FALSE	High	[K].SLAQAEAEK.[Q]	0.0034393	0.000427246	4	25	14	CAA91196.1; XP_005251037.1; EAW82172.1; XP_011515432.1	CAA91196.1 [1793-1801]; XP_005251037.1 [1661-1669]; EAW82172.1 [1683-1691]; XP_011515432.1 [1661-1669]		0	946.484	1.176	0.840351	120.5	93.8	99.4	10.17	13.71	10.81	9.19	11.57
	FALSE	High	[R].SLESLHSFVAAATK.[E]	1.4305e-06	1.93435e-05	4	26	15	CAA91196.1; XP_005251037.1; EAW82172.1; XP_011515432.1	CAA91196.1 [751-764]; XP_005251037.1 [619-632]; EAW82172.1 [641-654]; XP_011515432.1 [619-632]		0	1460.77	0.776	0.996148	123.8	98.5	109.8	4.52	1.34	5.76	5.37	3.31
	FALSE	High	[K].SLLAWQSLR.[R]	0.00362755	0.000427246	4	26	8	CAA91196.1; XP_005251037.1; EAW82172.1; XP_011515432.1	CAA91196.1 [1029-1037]; XP_005251037.1 [897-905]; EAW82172.1 [919-927]; XP_011515432.1 [897-905]		0	1073.61	0.01	0.949166	127.7	102.3	110.4		5.7	9.79	25.73	10.07
	FALSE	High	[K].SIITYVSSLYDAMPR.[V]	1.18916e-08	1.93435e-05	4	26	4	CAA91196.1; XP_005251037.1; EAW82172.1; XP_011515432.1	CAA91196.1 [387-401]; XP_005251037.1 [255-269]; EAW82172.1 [277-291]; XP_011515432.1 [259-273]		0	1715.87	0.01	0.00483331	25	243.5	200.2			23.94	55.21	66.09
	FALSE	High	[K].SIITYVSSLYDAMPR.[V]	0.0683577	0.00506504	4	26	1	CAA91196.1; XP_005251037.1; EAW82172.1; XP_011515432.1	CAA91196.1 [387-401]; XP_005251037.1 [255-269]; EAW82172.1 [277-291]; XP_011515432.1 [259-273]		0	1731.86	0.223	6.09287e-17	161.7	158.6			6.78	20.32
	FALSE	High	[R].SIQEELQQLR.[Q]	6.30274e-05	1.93435e-05	4	25	20	CAA91196.1; XP_005251037.1; EAW82172.1; XP_011515432.1	CAA91196.1 [1554-1563]; XP_005251037.1 [1422-1431]; EAW82172.1 [1444-1453]; XP_011515432.1 [1422-1431]		0	1243.66	1.256	0.421322	139.9	74.3	84.7	18.27	4.19	3.24	10.18	5.99
	FALSE	High	[R].SLSAIYLEK.[L]	0.00431879	0.000483359	4	26	16	CAA91196.1; XP_005251037.1; EAW82172.1; XP_011515432.1	CAA91196.1 [1216-1224]; XP_005251037.1 [1084-1092]; EAW82172.1 [1106-1114]; XP_011515432.1 [1084-1092]		0	1023.57	0.979	0.789474	138.5	83.6	97.6	4.08	10.65	12.8	8.2	5.31
	FALSE	High	[R].SLVPAAELLESR.[V]	0.000107158	1.93435e-05	3	25	9	CAA91196.1; XP_005251037.1; XP_011515432.1	CAA91196.1 [3116-3127]; XP_005251037.1 [2984-2995]; XP_011515432.1 [2984-2995]		0	1284.72	0.996	0.296556	202.1	80.6		3.91	3.7	7.43	80.43
	FALSE	Medium	[K].SMIIDR.[R]	0.467158	0.0385561	3	26	11	CAA91196.1; XP_005251037.1; XP_011515432.1	CAA91196.1 [4329-4334]; XP_005251037.1 [4197-4202]; XP_011515432.1 [4197-4202]		0	734.387	1.012	0.908465	123.3	90.5	94.5	4.57	8.03	5.33	17.71	8.38
	FALSE	High	[R].SMVEEGTGLR.[L]	0.00164924	0.000154191	3	26	12	CAA91196.1; XP_005251037.1; XP_011515432.1	CAA91196.1 [4590-4599]; XP_005251037.1 [4458-4467]; XP_011515432.1 [4458-4467]		0	1078.52	0.657	0.973486	122.3	113.6	107.8	11.9	5.88	5.1	18.33	1.01
	FALSE	High	[R].SMVEEGTGLR.[L]	0.000271948	4.2772e-05	3	26	8	CAA91196.1; XP_005251037.1; XP_011515432.1	CAA91196.1 [4590-4599]; XP_005251037.1 [4458-4467]; XP_011515432.1 [4458-4467]		0	1094.51	100	6.09287e-17	108.1	116.5	74.7	34.58	16.92	22.03
	FALSE	High	[R].SNAEDTLR.[S]	0.011515	0.00104196	4	26	38	CAA91196.1; XP_005251037.1; EAW82172.1; XP_011515432.1	CAA91196.1 [2090-2097]; XP_005251037.1 [1958-1965]; EAW82172.1 [1980-1987]; XP_011515432.1 [1958-1965]		0	905.432	1.016	0.983939	108.7	100.8	103.2	15.64	9.07	12	16.55	27.35
	FALSE	High	[R].SQVEEELFSVR.[V]	5.8808e-06	1.93435e-05	4	26	14	CAA91196.1; XP_005251037.1; EAW82172.1; XP_011515432.1	CAA91196.1 [2361-2371]; XP_005251037.1 [2229-2239]; EAW82172.1 [2251-2261]; XP_011515432.1 [2229-2239]		0	1322.66	1.008	0.608731	152	84.3	69.9	4.92	4.88	4.7	5.2	8.9
	FALSE	High	[R].SQVMDEATALQLR.[E]	1.47434e-06	1.93435e-05	3	26	11	CAA91196.1; XP_005251037.1; XP_011515432.1	CAA91196.1 [4037-4049]; XP_005251037.1 [3905-3917]; XP_011515432.1 [3905-3917]		0	1461.74	0.725	0.93681	131.4	100.5	99.9	3.75	6.18	7.54	12.11	8.14
	FALSE	High	[R].SQVMDEATALQLR.[E]	1.77798e-05	1.93435e-05	3	26	4	CAA91196.1; XP_005251037.1; XP_011515432.1	CAA91196.1 [4037-4049]; XP_005251037.1 [3905-3917]; XP_011515432.1 [3905-3917]		0	1477.73	0.01	0.888547	129.7	89.8	143.3		44.75	15.1	36.3	5.93
	FALSE	High	[R].SSIAGLLLK.[A]	0.000410479	4.2772e-05	3	25	14	CAA91196.1; XP_005251037.1; XP_011515432.1	CAA91196.1 [2833-2841]; XP_005251037.1 [2701-2709]; XP_011515432.1 [2701-2709]		0	901.572	0.653	0.974952	107.7	119.7	121.2	10.45	9.42	5.9	5.53	7.5
	FALSE	High	[R].SSSVGSSSSYPISPAVSR.[T]	6.99839e-10	1.93435e-05	3	26	10	CAA91196.1; XP_005251037.1; XP_011515432.1	CAA91196.1 [4384-4401]; XP_005251037.1 [4252-4269]; XP_011515432.1 [4252-4269]		0	1754.86	0.468	0.557367	164.7	75.7	109.7	51.36	9.09	14.87	23.02	12.36
	FALSE	High	[R].SYVDPSTDER.[L]	0.000194933	4.2772e-05	3	26	30	CAA91196.1; XP_005251037.1; XP_011515432.1	CAA91196.1 [3982-3991]; XP_005251037.1 [3850-3859]; XP_011515432.1 [3850-3859]		0	1168.51	1.048	0.798692	131.9	89.2	89	4.75	3.58	4.57	20.58	7.16
	FALSE	Medium	[K].TAQLER.[S]	0.317517	0.0227663	4	25	10	CAA91196.1; XP_005251037.1; EAW82172.1; XP_011515432.1	CAA91196.1 [1726-1731]; XP_005251037.1 [1594-1599]; EAW82172.1 [1616-1621]; XP_011515432.1 [1594-1599]		0	717.389	1.599	0.950306	99.6	77.5	81.6	15.08	37.27	6	0.27	12.25
	FALSE	High	[K].TEAEIALK.[E]	0.00230926	0.000195525	4	26	15	CAA91196.1; XP_005251037.1; EAW82172.1; XP_011515432.1	CAA91196.1 [1987-1994]; XP_005251037.1 [1855-1862]; EAW82172.1 [1877-1884]; XP_011515432.1 [1855-1862]		0	874.488	1.169	0.861997	126.3	82.5	62	18.28	6.89	2.89	26.21	7.1
	FALSE	High	[R].TELATQEK.[V]	0.00280538	0.000282962	4	25	22	CAA91196.1; XP_005251037.1; EAW82172.1; XP_011515432.1	CAA91196.1 [2557-2564]; XP_005251037.1 [2425-2432]; EAW82172.1 [2447-2454]; XP_011515432.1 [2425-2432]		0	919.473	0.816	0.9352	100.6	104.2	106.9	21.91	16.31	9.47	7.59	9.97
	FALSE	Medium	[R].TEYNLR.[L]	0.191162	0.0132291	4	26	27	CAA91196.1; XP_005251037.1; EAW82172.1; XP_011515432.1	CAA91196.1 [623-628]; XP_005251037.1 [491-496]; EAW82172.1 [513-518]; XP_011515432.1 [491-496]		0	795.4	0.877	0.971867	113.4	109.4	108.3	1.71	20	16.91	17.54	6.95
	FALSE	High	[R].THYSELTTLTSQYIK.[F]	3.85788e-11	1.93435e-05	4	26	13	CAA91196.1; XP_005251037.1; EAW82172.1; XP_011515432.1	CAA91196.1 [1458-1472]; XP_005251037.1 [1326-1340]; EAW82172.1 [1348-1362]; XP_011515432.1 [1326-1340]		0	1784.91	0.431	0.904661	122.7	140.7	97.3	7.75	1.7	7.63	25.87	3.62
	FALSE	High	[R].TLKPEEQR.[Q]	0.0267083	0.00211867	4	26	10	CAA91196.1; XP_005251037.1; EAW82172.1; XP_011515432.1	CAA91196.1 [1053-1060]; XP_005251037.1 [921-928]; EAW82172.1 [943-950]; XP_011515432.1 [921-928]		0	1000.54	0.253	0.0223282	54.7	162.5	183.9	22.43	34.74	14.23	50.73	26.83
	FALSE	High	[R].TLLQGSGCLAGIYLEDTK.[E]	1.54401e-11	1.93435e-05	3	25	8	CAA91196.1; XP_005251037.1; XP_011515432.1	CAA91196.1 [3486-3503]; XP_005251037.1 [3354-3371]; XP_011515432.1 [3354-3371]		0	1939.97	0.83	0.98585	120.7	113.2	92.4	6.13	11.47	8.29	14.34	21.97
	FALSE	High	[K].TISLVIR.[G]	0.0557143	0.00435497	4	26	15	CAA91196.1; XP_005251037.1; EAW82172.1; XP_011515432.1	CAA91196.1 [1227-1233]; XP_005251037.1 [1095-1101]; EAW82172.1 [1117-1123]; XP_011515432.1 [1095-1101]		0	801.519	1.138	0.578926	138.4	74.4	104.2	9.47	13.28	17.18	9.86	2.29
	FALSE	High	[K].TPVEVPVGGFK.[G]	4.76081e-06	1.93435e-05	3	25	16	CAA91196.1; XP_005251037.1; XP_011515432.1	CAA91196.1 [3374-3384]; XP_005251037.1 [3242-3252]; XP_011515432.1 [3242-3252]		0	1129.63	0.812	0.991475	108.9	109.7	115.6	6.9	5.49	8.2	7.58	1.71
	FALSE	High	[R].TQLASWSDPTEETGPVAGILDTETLEK.[V]	8.95835e-16	1.93435e-05	3	26	13	CAA91196.1; XP_005251037.1; XP_011515432.1	CAA91196.1 [4402-4428]; XP_005251037.1 [4270-4296]; XP_011515432.1 [4270-4296]		0	2888.4	0.782	0.984131	127.6	98.7	94.7	2.64	4.84	11.68	0.96	3.83
	FALSE	High	[K].TVTIWEIINSEYFTAEQR.[R]	3.25563e-13	1.93435e-05	3	25	3	CAA91196.1; XP_005251037.1; XP_011515432.1	CAA91196.1 [3058-3075]; XP_005251037.1 [2926-2943]; XP_011515432.1 [2926-2943]		0	2200.09	0.543	0.97628	128.9	122.4	117.2	16.72	42.01	4.05	10.31	70.17
	FALSE	High	[R].TVTVWELISSEYFTAEQR.[Q]	6.10632e-13	1.93435e-05	3	25	3	CAA91196.1; XP_005251037.1; XP_011515432.1	CAA91196.1 [3387-3404]; XP_005251037.1 [3255-3272]; XP_011515432.1 [3255-3272]		0	2159.07	0.219	0.846287	125.7	142.8	95.6	51.63	27.15	13.87	24.89	48.74
	FALSE	Medium	[R].VAEMSR.[A]	0.470449	0.038896	4	25	6	CAA91196.1; XP_005251037.1; EAW82172.1; XP_011515432.1	CAA91196.1 [2526-2531]; XP_005251037.1 [2394-2399]; EAW82172.1 [2416-2421]; XP_011515432.1 [2394-2399]		0	692.34	0.683	0.944112	108.8	122.1	94	16.29	33.65	19.14	23.53	26.12
	FALSE	High	[R].VAQLLER.[W]	0.0202135	0.00164369	4	25	48	CAA91196.1; XP_005251037.1; EAW82172.1; XP_011515432.1	CAA91196.1 [1318-1324]; XP_005251037.1 [1186-1192]; EAW82172.1 [1208-1214]; XP_011515432.1 [1186-1192]		0	828.494	1.127	0.569373	147.1	83.6	80.4	12.08	3.68	0.56	7.85	4.51
	FALSE	High	[R].VDGAEWGVDLPSVEAQLGSHR.[G]	1.4675e-14	1.93435e-05	4	26	2	CAA91196.1; XP_005251037.1; EAW82172.1; XP_011515432.1	CAA91196.1 [676-696]; XP_005251037.1 [544-564]; EAW82172.1 [566-586]; XP_011515432.1 [544-564]		0	2222.08
	FALSE	Medium	[R].VKAEAEAAR.[E]	0.491925	0.0415308	4	24	1	CAA91196.1; XP_005251037.1; EAW82172.1; XP_011515432.1	CAA91196.1 [1658-1666]; XP_005251037.1 [1526-1534]; EAW82172.1 [1548-1556]; XP_011515432.1 [1526-1534]		1	944.516		6.09287e-17	151.7		217.6			8.5		34.12
	FALSE	High	[R].VLADPSDDTK.[G]	2.39175e-05	1.93435e-05	4	34	36	CAA91196.1; XP_005251037.1; XP_016869381.1; XP_011515432.1	CAA91196.1 [2979-2988]; [3638-3647]; XP_005251037.1 [2847-2856]; [3506-3515]; XP_016869381.1 [2408-2417]; [2944-2953]; [3475-3484]; [4009-4018]; XP_011515432.1 [2847-2856]; [3506-3515]		0	1060.52	0.991	0.785899	141.1	103.7	86.8	19.18	2.07	23.72	13.85	15.03
	FALSE	High	[K].VLALPEPSPAAPTLR.[S]	2.09304e-07	1.93435e-05	4	26	14	CAA91196.1; XP_005251037.1; EAW82172.1; XP_011515432.1	CAA91196.1 [1187-1201]; XP_005251037.1 [1055-1069]; EAW82172.1 [1077-1091]; XP_011515432.1 [1055-1069]		0	1531.88	0.858	0.881337	119.4	103.3	102.6	7.93	2.33	3.06	5.76	2.09
	FALSE	High	[K].VLSSSGSEAAVPSVCFLVPPPNQEAQEAVTR.[L]	5.47656e-12	1.93435e-05	3	25	8	XP_005251037.1; EAW82172.1; XP_011515432.1	XP_005251037.1 [846-876]; EAW82172.1 [868-898]; XP_011515432.1 [846-876]		0	3227.59	0.663	0.987931	116.9	109.2	103.3	21.27	40.17	25.98	2.04	14.37
	FALSE	High	[R].VPDVQDGELQLR.[W]	2.0308e-07	1.93435e-05	1	1	4	XP_011515432.1	XP_011515432.1 [274-285]		0	1368.71	0.01	0.824672	103.1	128.5	108.9		4.29	3.27	9.69	4.29
	FALSE	High	[R].VPLDEALQR.[G]	0.000187328	4.2772e-05	3	26	23	CAA91196.1; XP_005251037.1; XP_011515432.1	CAA91196.1 [4543-4551]; XP_005251037.1 [4411-4419]; XP_011515432.1 [4411-4419]		0	1040.57	0.993	0.699955	140	92.9	75.1	3.92	1.92	12.02	2.21	7.09
	FALSE	High	[R].VPLDVACAR.[G]	0.000663078	9.10162e-05	3	25	15	CAA91196.1; XP_005251037.1; XP_011515432.1	CAA91196.1 [3289-3297]; XP_005251037.1 [3157-3165]; XP_011515432.1 [3157-3165]		0	1001.51	0.851	0.919023	129.4	94.3	100.3	0.37	1.98	9.82	5.02	5.64
	FALSE	High	[K].VPPGYHPLDVEK.[E]	9.51697e-07	1.93435e-05	4	26	31	CAA91196.1; XP_005251037.1; EAW82172.1; XP_011515432.1	CAA91196.1 [494-505]; XP_005251037.1 [362-373]; EAW82172.1 [384-395]; XP_011515432.1 [362-373]		0	1350.71	0.885	0.936583	128.9	98	86.2	5.19	16.61	17.97	3.37	1.99
	FALSE	High	[K].VPPGYHPLDVEKEWGK.[L]	0.0086758	0.000802402	4	26	2	CAA91196.1; XP_005251037.1; EAW82172.1; XP_011515432.1	CAA91196.1 [494-509]; XP_005251037.1 [362-377]; EAW82172.1 [384-399]; XP_011515432.1 [362-377]		1	1850.94	0.083	0.0983898	38.7	148.2	270.3	41.23	11.81	7.55	43.07	3.98
	FALSE	High	[R].VPVDVAYQR.[G]	0.000193966	4.2772e-05	4	29	31	CAA91196.1; XP_005251037.1; XP_016869381.1; XP_011515432.1	CAA91196.1 [3620-3628]; XP_005251037.1 [3488-3496]; XP_016869381.1 [2926-2934]; XP_011515432.1 [3488-3496]		0	1046.56	0.816	0.858386	131.8	92.2	107.6	4.34	7.6	22.75	25.62	6.94
	FALSE	High	[R].VPVDVAYR.[RC]	0.00425643	0.000483359	4	34	27	CAA91196.1; XP_005251037.1; XP_016869381.1; XP_011515432.1	CAA91196.1 [2961-2968]; XP_005251037.1 [2829-2836]; XP_016869381.1 [771-778]; [1732-1739]; [2390-2397]; [3457-3464]; [3991-3998]; XP_011515432.1 [2829-2836]		0	918.504	0.609	0.800817	115.2	103.6	118.2	18.01	14.13	25.18	19.97	6.92
	FALSE	High	[R].VQMEELSK.[L]	0.00548025	0.000596903	4	26	25	CAA91196.1; XP_005251037.1; EAW82172.1; XP_011515432.1	CAA91196.1 [2372-2379]; XP_005251037.1 [2240-2247]; EAW82172.1 [2262-2269]; XP_011515432.1 [2240-2247]		0	963.482	1.065	0.861381	120	83.7	113.8	13.55	2.44	1.95	8.58	11.55
	FALSE	Medium	[R].VQMEELSK.[L]	0.214532	0.0149056	4	26	1	CAA91196.1; XP_005251037.1; EAW82172.1; XP_011515432.1	CAA91196.1 [2372-2379]; XP_005251037.1 [2240-2247]; EAW82172.1 [2262-2269]; XP_011515432.1 [2240-2247]		0	979.476	2.033	0.987104	147.8	130.3	76.8	64.75	41.39	25.65	118.7	28.59
	FALSE	High	[K].VQSGSESVIQEYVDLR.[T]	5.96561e-12	1.93435e-05	4	26	15	CAA91196.1; XP_005251037.1; EAW82172.1; XP_011515432.1	CAA91196.1 [1442-1457]; XP_005251037.1 [1310-1325]; EAW82172.1 [1332-1347]; XP_011515432.1 [1310-1325]		0	1808.9	0.782	0.99908	119.4	109.6	98.4	3.7	7.76	6.33	4.54	4.98
	FALSE	High	[K].VSITEAMHR.[N]	3.05942e-05	1.93435e-05	3	26	34	CAA91196.1; XP_005251037.1; XP_011515432.1	CAA91196.1 [4429-4437]; XP_005251037.1 [4297-4305]; XP_011515432.1 [4297-4305]		0	1043.53	0.68	0.973865	112.9	113.6	121.8	4.23	8.82	0.77	18.3	12.46
	FALSE	High	[K].VSIYEAMR.[R]	0.00411446	0.000483359	3	25	21	CAA91196.1; XP_005251037.1; XP_011515432.1	CAA91196.1 [3506-3513]; XP_005251037.1 [3374-3381]; XP_011515432.1 [3374-3381]		0	968.487	0.761	0.984404	109.2	109.8	109.5	2.29	3.86	4.24	9.55	3.8
	FALSE	High	[K].VSIYEAMR.[R]	0.0863166	0.00651117	3	25	1	CAA91196.1; XP_005251037.1; XP_011515432.1	CAA91196.1 [3506-3513]; XP_005251037.1 [3374-3381]; XP_011515432.1 [3374-3381]		0	984.482	100	6.09287e-17	149.5		125.8		102.58	60.01
	FALSE	High	[K].VTLVQTLEIQR.[Q]	3.6466e-06	1.93435e-05	4	25	12	CAA91196.1; XP_005251037.1; EAW82172.1; XP_011515432.1	CAA91196.1 [2565-2575]; XP_005251037.1 [2433-2443]; EAW82172.1 [2455-2465]; XP_011515432.1 [2433-2443]		0	1299.76	0.663	1	121.8	117.5	99.9	3.34	4.7	2.39	4.91	7.98
	FALSE	High	[R].VVIVDPETGK.[E]	7.81828e-05	1.93435e-05	3	26	30	CAA91196.1; XP_005251037.1; XP_011515432.1	CAA91196.1 [4278-4287]; XP_005251037.1 [4146-4155]; XP_011515432.1 [4146-4155]		0	1056.59	1.053	0.898663	137.8	93.8	58.7	14.22	6.02	16.26	10.53	2.85
	FALSE	High	[R].VVIVDPETGKEMSVYEAYR.[K]	2.42064e-10	1.93435e-05	3	26	2	CAA91196.1; XP_005251037.1; XP_011515432.1	CAA91196.1 [4278-4296]; XP_005251037.1 [4146-4164]; XP_011515432.1 [4146-4164]		1	2185.08	0.943	1	176.7	91.4	145.8					156.45
	FALSE	High	[R].WQAVLAQTDVR.[Q]	3.68422e-05	1.93435e-05	4	25	14	CAA91196.1; XP_005251037.1; EAW82172.1; XP_011515432.1	CAA91196.1 [1325-1335]; XP_005251037.1 [1193-1203]; EAW82172.1 [1215-1225]; XP_011515432.1 [1193-1203]		0	1286.69	0.697	0.888717	143	89.8	123.1	0.77	8.33	6.7	14.47	2.97
	FALSE	High	[R].YASGSSASLGGPESAVA.[-]	0.00207444	0.000195525	3	26	5	CAA91196.1; XP_005251037.1; XP_011515432.1	CAA91196.1 [4668-4684]; XP_005251037.1 [4536-4552]; XP_011515432.1 [4536-4552]		0	1510.7	0.726	0.973883	113.7	127.1	104.8	16.17	16.2	5.14	4.88	13.57
	FALSE	High	[R].YLQDLLAWVEENQHR.[V]	5.84675e-12	1.93435e-05	4	26	13	CAA91196.1; XP_005251037.1; EAW82172.1; XP_011515432.1	CAA91196.1 [661-675]; XP_005251037.1 [529-543]; EAW82172.1 [551-565]; XP_011515432.1 [529-543]		0	1913.95	0.762	0.990868	113.9	106.1	116.9	12.06	2.75	8.85	4.76	6.77
	FALSE	Medium	[K].YLTCPK.[T]	0.19777	0.0137559	3	26	2	CAA91196.1; XP_005251037.1; XP_011515432.1	CAA91196.1 [4571-4576]; XP_005251037.1 [4439-4444]; XP_011515432.1 [4439-4444]		0	782.375	0.909	0.939579	117.4	102.6	101.7	19.26	10.48	12.84	19.54	4.57
FALSE	High	Master Protein	XP_016873759.1	0	2586.04	77	299	3532	193	5823	621.4	6.15	52474	299	AHNAK	0.732	0.856	0.993	0.929	0.4937	0.814934	0.990627	0.93673
	Checked	Confidence	Annotated Sequence	Qvality PEP	Qvality q-value	# Protein Groups	# Proteins	# PSMs	Master Protein Accessions	Positions in Master Proteins	Modifications in Master Proteins	# Missed Cleavages	Theo. MH+ [Da]	Abundance Ratio: (5000uM 24h) / (50uM 24h)	Abundance Ratio Adj. P-Value: (5000uM 6Days) / (50uM 24h)	Abundances (Grouped): 5000uM 6Days	Abundances (Grouped): 50uM 24h	Abundances (Grouped): 50uM 48h	Abundances (Grouped) CV [%]: 5000uM 24h	Abundances (Grouped) CV [%]: 5000uM 48h	Abundances (Grouped) CV [%]: 5000uM 6Days	Abundances (Grouped) CV [%]: 50uM 24h	Abundances (Grouped) CV [%]: 50uM 48h
	FALSE	High	[K].ADIDISGPNVDVDVPDVNIEGPDAK.[L]	9.17698e-16	1.93435e-05	1	3	12	XP_016873759.1	XP_016873759.1 [3562-3586]		0	2564.24	0.761	0.954634	129.3	95	118.6	25.32	25.09	3.05	2.62	16.82
	FALSE	High	[K].ADIDVSGPK.[V]	0.000624979	6.84312e-05	2	12	38	AAA69899.1; XP_016873759.1	AAA69899.1 [1034-1042]; XP_016873759.1 [1281-1289]; [2598-2606]; [2726-2734]; [2982-2990]; [3110-3118]; [3764-3772]; [3892-3900]; [4020-4028]; [4148-4156]; [4612-4620]; [4740-4748]		0	901.463	1.015	0.968406	92.2	102.7	105.9	7.3	10.19	7.48	12.54	5.83
	FALSE	High	[K].ADIDVSGPKVDVECPDVNIEGPEGK.[W]	5.90887e-09	1.93435e-05	1	4	3	XP_016873759.1	XP_016873759.1 [2726-2750]		1	2640.23					500					27.19
	FALSE	High	[K].ADIDVSGPSVDTDAPDLDIEGPEGK.[L]	8.43236e-16	1.93435e-05	2	6	12	AAA69899.1; XP_016873759.1	AAA69899.1 [1492-1516]; XP_016873759.1 [1739-1763]		0	2512.16	0.622	0.803162	97.7	118.7	118.4	12.8	13.84	4.85	7.65	15.88
	FALSE	High	[K].ADIEISGPK.[V]	0.000476227	4.2772e-05	1	9	18	XP_016873759.1	XP_016873759.1 [4276-4284]		0	929.494	0.867	0.963232	113.6	87.3	94.7	18.16	0.55	3.37	18.89	19.9
	FALSE	High	[K].ADLGVSGPK.[V]	0.00164121	0.000154191	2	6	5	AAA69899.1; XP_016873759.1	AAA69899.1 [1290-1298]; XP_016873759.1 [1537-1545]		0	843.457	0.835	0.439145	157.5	69.2	101.4	38.91	18.14	8.79	34.22	29.28
	FALSE	High	[K].ADVDISGPK.[IV]	0.00129187	0.000154191	2	9	6	AAA69899.1; XP_016873759.1	AAA69899.1 [529-537]; [657-665]; XP_016873759.1 [776-784]; [904-912]; [2470-2478]		0	901.463	0.567	0.995725	120	125.8	91.6	11.27	6.83	3.27	24.07	4.27
	FALSE	High	[K].ADVDVSGPK.[VM]	0.00090826	9.10162e-05	2	8	31	AAA69899.1; XP_016873759.1	AAA69899.1 [906-914]; [1162-1170]; XP_016873759.1 [1409-1417]; [2203-2211]; [2854-2862]		0	887.447	1.134	0.892304	108	93.2	97.8	11.9	25.56	20.49	2.68	25.28
	FALSE	High	[K].ADVVVSGPK.[V]	0.00106239	0.000139161	1	6	22	XP_016873759.1	XP_016873759.1 [1153-1161]; [2008-2016]		0	871.488	0.875	0.985263	117.8	102.5	90.6	12.45	10.34	13.83	24.9	0.49
	FALSE	High	[K].AEAPLPSPK.[L]	0.0112255	0.000986687	1	10	13	XP_016873759.1	XP_016873759.1 [5037-5045]		0	909.504	0.687	0.989482	146.3	121.9	61.2	8.87	27.81	10.36	8.81	30.68
	FALSE	High	[K].AEASIQAGAGDGEWEESEVK.[L]	3.45825e-13	1.93435e-05	1	9	15	XP_016873759.1	XP_016873759.1 [5620-5639]		0	2062.92	0.732	0.815661	96.4	122.6	112.5	21.81	6.23	4.45	12.09	6.08
	FALSE	High	[K].AEGPDVAVDLPK.[G]	0.000103473	1.93435e-05	1	3	13	XP_016873759.1	XP_016873759.1 [3422-3433]		0	1210.63	0.754	0.932557	104.1	109.9	102.8	9.27	7.36	4.55	12.04	6.74
	FALSE	High	[K].AEGPEVDVNLPK.[A]	1.28878e-05	1.93435e-05	2	9	21	AAA69899.1; XP_016873759.1	AAA69899.1 [517-528]; [645-656]; XP_016873759.1 [764-775]; [892-903]; [1727-1738]; [1996-2007]; [2458-2469]; [2842-2853]		0	1267.65	0.885	0.975727	106	99.7	113.5	4.52	3.75	5.05	9.4	3.92
	FALSE	High	[R].AGAISASGPELQGAGHSK.[L]	6.28504e-11	1.93435e-05	1	6	32	XP_016873759.1	XP_016873759.1 [226-243]		0	1637.82	0.804	0.948983	95.2	114.6	109.5	4.02	8.85	27.84	13.25	22.8
	FALSE	High	[K].AKGEVDVDVPK.[L]	0.008941	0.000802402	1	4	2	XP_016873759.1	XP_016873759.1 [2333-2343]		1	1156.62	0.85	0.972789	111.3	114.4	85.1	16.23	16.65	7.46	11.2	15.14
	FALSE	High	[K].AKGEVDVDVPKLEGDLK.[G]	1.98035e-07	1.93435e-05	1	4	1	XP_016873759.1	XP_016873759.1 [2333-2349]		2	1811.97	0.01	6.09287e-17	58	146.9	295.1				45	6.48
	FALSE	High	[K].ANVDISAPK.[V]	0.00524502	0.000557966	2	7	8	AAA69899.1; XP_016873759.1	AAA69899.1 [778-786]; XP_016873759.1 [1025-1033]		0	914.494	0.329	0.945128	135.7	133.9	75.3	36.42	13.06	2.37	9.64	34.46
	FALSE	High	[K].APDVDIK.[G]	0.0431356	0.00348437	2	6	16	AAA69899.1; XP_016873759.1	AAA69899.1 [1235-1241]; XP_016873759.1 [1482-1488]		0	757.409	1.935	0.252495	131.4	57.9	79.3	18.51	3.77	5.23	30.51	2.69
	FALSE	High	[K].APDVDVNIAGPDAALK.[V]	3.77403e-12	1.93435e-05	1	10	9	XP_016873759.1	XP_016873759.1 [4990-5005]		0	1565.82	0.894	0.961731	124.7	92.9	80.2	16.39	3.01	4.25	17.9	37.49
	FALSE	High	[K].APDVEGQGLDWSLK.[I]	2.03643e-05	1.93435e-05	2	6	1	AAA69899.1; XP_016873759.1	AAA69899.1 [865-878]; XP_016873759.1 [1112-1125]		0	1514.75	1.306	0.394887	140.1	63.1	79	16.8	6.27	5.07	9.11	2.6
	FALSE	High	[K].APEVDIK.[G]	0.0768229	0.00568181	1	7	10	XP_016873759.1	XP_016873759.1 [3965-3971]		0	771.425	0.713	0.761663	91.1	134.7	86.5	4.84	3.6	8.6	14.84	5.36
	FALSE	High	[K].APEVNLNAPDVDVHGPDWNLK.[M]	7.15519e-16	1.93435e-05	1	3	12	XP_016873759.1	XP_016873759.1 [3386-3406]		0	2300.13	0.699	0.986152	112.9	107.4	106.6	8.82	1.91	3.25	3.74	8.5
	FALSE	High	[K].APNISMPDVDLNLK.[G]	5.97965e-08	1.93435e-05	1	4	1	XP_016873759.1	XP_016873759.1 [2383-2396]		0	1526.79	0.58	0.770667	95.3	127.3	129	5.86	5.09	6.72	11.88	3.58
	FALSE	High	[K].APSLDIK.[G]	0.0510393	0.00409808	1	3	19	XP_016873759.1	XP_016873759.1 [3257-3263]		0	743.43	0.738	0.858282	90.7	113.7	118.6	4.28	3.93	2.12	1.62	8.25
	FALSE	High	[K].ASLGSLEGEAEAEASSPK.[G]	7.41031e-09	1.93435e-05	1	8	7	XP_016873759.1	XP_016873759.1 [5681-5698]		0	1732.82
	FALSE	High	[R].AVEVQGPSLESGDHGK.[I]	1.12513e-08	1.93435e-05	1	7	45	XP_016873759.1	XP_016873759.1 [288-303]		0	1609.78	0.583	0.852787	105.9	119.5	85	14.31	8.56	5.36	18.03	3.69
	FALSE	High	[R].DDGVFVQEVTQNSPAAR.[T]	4.02375e-10	1.93435e-05	1	9	16	XP_016873759.1	XP_016873759.1 [29-45]		0	1832.88	0.71	0.0230659	36.1	132.4	122.4	53.81	2.47	12.85	14.35	4.34
	FALSE	High	[K].DIDISSPEFK.[I]	0.000502866	4.2772e-05	1	6	15	XP_016873759.1	XP_016873759.1 [172-181]		0	1150.56	0.711	0.896528	104.2	108.4	110.2	16.71	6.88	6.29	7.04	6.06
	FALSE	High	[R].EFSGPSTPTGTLEFEGGEVSLEGGK.[V]	1.35831e-15	1.93435e-05	1	8	14	XP_016873759.1	XP_016873759.1 [5721-5745]		0	2512.17	1.026	0.983939	87.7	87.7	121.5	4.02	29.57	27.41	33.96	7.41
	FALSE	High	[R].ELLLPNWQGSGSHGLTIAQR.[D]	1.6401e-11	1.93435e-05	1	9	12	XP_016873759.1	XP_016873759.1 [9-28]		0	2177.15	0.478	0.991072	134.4	111.6	113.9	5.34	2.9	6.68	11.1	4.22
	FALSE	High	[R].EMGVDVHFPK.[A]	0.000151221	4.2772e-05	1	9	7	XP_016873759.1	XP_016873759.1 [5610-5619]		0	1158.56	0.587	0.915966	115.4	132.3	88.7	19.19	13.06	10.23	19.89	24.51
	FALSE	High	[PR].EVDVNLPK.[A]	0.0293739	0.00235638	2	6	9	AAA69899.1; XP_016873759.1	AAA69899.1 [521-528]; [649-656]; [898-905]; [1026-1033]; XP_016873759.1 [768-775]; [896-903]; [1145-1152]; [1273-1280]; [1731-1738]; [2000-2007]; [2195-2202]; [2462-2469]; [2846-2853]; [3102-3109]; [3884-3891]; [4012-4019]		0	913.499	0.739	0.999831	110.4	104	107.6	4.38	21.44	18.94	11.34	5.81
	FALSE	High	[R].EVFSSCSSEVVLSGDDEEYQR.[I]	7.19109e-16	1.93435e-05	1	6	7	XP_016873759.1	XP_016873759.1 [103-123]		0	2423.02	0.58	1	127.8	123.8	83.1	17.97	4.31	14.2	3.69	16.83
	FALSE	High	[K].FAGGLHFSGPK.[V]	7.10826e-07	1.93435e-05	1	9	15	XP_016873759.1	XP_016873759.1 [5546-5556]		0	1117.58	0.699	0.842882	86	126.8	109.7	11.4	2.03	3.65	5.98	0.55
	FALSE	Medium	[K].FGFGAK.[S]	0.455676	0.0373477	1	9	9	XP_016873759.1	XP_016873759.1 [4913-4918]		0	626.33	1	0.961731	119.6	102	81.9	7.72	1.82	20.3	0.78	22.11
	FALSE	High	[K].FGTFGGLGSK.[S]	0.0067663	0.000722819	1	8	8	XP_016873759.1	XP_016873759.1 [5755-5764]		0	970.499
	FALSE	High	[K].FGVSTGR.[E]	0.10182	0.00762533	2	8	11	AAA69899.1; XP_016873759.1	AAA69899.1 [67-73]; XP_016873759.1 [314-320]		0	723.378	1.039	0.884604	86	114.3	108.9	19.28	28.79	8.87	17.06	15.64
	FALSE	High	[K].FKAEAPLPSPK.[L]	0.0158305	0.00137497	1	10	3	XP_016873759.1	XP_016873759.1 [5035-5045]		1	1184.67	0.034	5.53087e-05	174	120.1	158.7				40.62	23.84
	FALSE	High	[K].FKIPEMHLK.[A]	3.33215e-05	1.93435e-05	1	4	13	XP_016873759.1	XP_016873759.1 [3666-3674]		1	1142.64	0.358	0.336003	73.2	158.6	134.8	23.12	21.09	6.05	2.04	18.79
	FALSE	High	[K].FKMPDLHLK.[A]	7.11948e-06	1.93435e-05	1	9	6	XP_016873759.1	XP_016873759.1 [4050-4058]; [4514-4522]		1	1128.62	0.01	6.09287e-17	27.4	123.4	316.5		31.3		52.87	16.7
	FALSE	High	[K].FKMPDMHFK.[A]	0.00128557	0.000154191	2	7	3	AAA69899.1; XP_016873759.1	AAA69899.1 [1663-1671]; XP_016873759.1 [1910-1918]; [2307-2315]; [2374-2382]		1	1180.56	0.01	6.09287e-17		107.7	363.2					31.41
	FALSE	High	[K].FKMPDMNIK.[A]	0.00583956	0.000615159	1	3	4	XP_016873759.1	XP_016873759.1 [3464-3472]		1	1123.56	0.01	0.697887	35.3	90.8	349.1		23.87	5.83	53.75	7.81
	FALSE	High	[K].FKMPEINIK.[A]	0.0646682	0.00487842	1	9	3	XP_016873759.1	XP_016873759.1 [4770-4778]		1	1119.62	0.01	0.625624	42.4	99.6	274.7		20.2	41.44	56.75	5.92
	FALSE	High	[K].FKMPEMHFK.[TA]	2.52769e-05	1.93435e-05	2	8	16	AAA69899.1; XP_016873759.1	AAA69899.1 [936-944]; [1064-1072]; [1394-1402]; [1596-1604]; XP_016873759.1 [1183-1191]; [1311-1319]; [1641-1649]; [1843-1851]; [2105-2113]; [2233-2241]; [2756-2764]		1	1194.58	0.229	0.105153	34.8	107.6	299	42.99	17.88	11.56	47.89	24.97
	FALSE	High	[K].FKMPEMHFR.[A]	0.0785496	0.00584861	2	7	1	AAA69899.1; XP_016873759.1	AAA69899.1 [808-816]; XP_016873759.1 [1055-1063]		1	1222.59
	FALSE	High	[K].FKMPEMNIK.[AV]	1.41798e-05	1.93435e-05	2	12	25	AAA69899.1; XP_016873759.1	AAA69899.1 [559-567]; [687-695]; XP_016873759.1 [806-814]; [934-942]; [2628-2636]; [2884-2892]; [3012-3020]; [3140-3148]; [3592-3600]; [3794-3802]; [3922-3930]; [4178-4186]; [4306-4314]; [4380-4388]		1	1137.58	0.408	0.531401	48.7	90.9	287	13.38	9.63	8.1	44.12	4.34
	FALSE	Medium	[K].FKMPEMNIK.[AV]	0.202595	0.0140697	2	12	1	AAA69899.1; XP_016873759.1	AAA69899.1 [559-567]; [687-695]; XP_016873759.1 [806-814]; [934-942]; [2628-2636]; [2884-2892]; [3012-3020]; [3140-3148]; [3592-3600]; [3794-3802]; [3922-3930]; [4178-4186]; [4306-4314]; [4380-4388]		1	1153.57	0.01	6.09287e-17	29.4	118.9	283.6				26.41	17.36
	FALSE	High	[K].FKMPEMSIK.[AP]	0.0990702	0.00732402	1	10	1	XP_016873759.1	XP_016873759.1 [1439-1447]; [4642-4650]		1	1110.57	0.01	0.907061	130.6	205.9	53.5		16.49	11.76	38.67
	FALSE	High	[K].FKMPEMSIKPQK.[I]	0.0102974	0.000875016	2	6	1	AAA69899.1; XP_016873759.1	AAA69899.1 [1192-1203]; XP_016873759.1 [1439-1450]		1	1463.77	0.01	6.09287e-17	15.9	43.9	440.2				55.44	5.71
	FALSE	Medium	[K].FNFSGSK.[V]	0.158139	0.0110482	1	3	5	XP_016873759.1	XP_016873759.1 [3290-3296]		0	786.378	0.722	0.951322	131.6	108.9	90.8	6.77	13.9	6.27	8.47	7.74
	FALSE	High	[K].FNFSKPK.[G]	0.000815297	9.10162e-05	1	8	14	XP_016873759.1	XP_016873759.1 [5650-5656]		0	867.472	0.708	0.892739	97.1	116.1	109.1	2.69	7.69	7.72	11.67	13.75
	FALSE	High	[K].FSMPGFK.[GA]	0.0545041	0.00425954	2	14	40	AAA69899.1; XP_016873759.1	AAA69899.1 [638-644]; [1015-1021]; [1143-1149]; [1271-1277]; [1473-1479]; XP_016873759.1 [885-891]; [1262-1268]; [1390-1396]; [1518-1524]; [1720-1726]; [1989-1995]; [2184-2190]; [2451-2457]; [2579-2585]; [2835-2841]; [2963-2969]; [3543-3549]; [3745-3751]; [4001-4007]; [4129-4135]; [4257-4263]; [4593-4599]; [4721-4727]		0	813.396	0.73	0.963282	103.5	113.3	106.5	2.52	9.37	11.6	16.32	2.19
	FALSE	High	[K].FSMPGFK.[GA]	0.0996148	0.00732402	2	14	4	AAA69899.1; XP_016873759.1	AAA69899.1 [638-644]; [1015-1021]; [1143-1149]; [1271-1277]; [1473-1479]; XP_016873759.1 [885-891]; [1262-1268]; [1390-1396]; [1518-1524]; [1720-1726]; [1989-1995]; [2184-2190]; [2451-2457]; [2579-2585]; [2835-2841]; [2963-2969]; [3543-3549]; [3745-3751]; [4001-4007]; [4129-4135]; [4257-4263]; [4593-4599]; [4721-4727]		0	829.391	1.298	0.833512	118.2	89.3	102.8	24.9	10.91	17.01	35.85	14.22
	FALSE	High	[K].FSMPGFKGEGPDVDVNLPK.[A]	0.000314052	4.2772e-05	1	11	1	XP_016873759.1	XP_016873759.1 [2963-2981]; [3745-3763]; [4129-4147]; [4593-4611]		1	2034	0.01	6.09287e-17		162.8	337.2					105.41
	FALSE	High	[K].FSMPSLK.[G]	0.0542059	0.00424605	2	7	28	AAA69899.1; XP_016873759.1	AAA69899.1 [759-765]; [887-893]; XP_016873759.1 [1006-1012]; [1134-1140]		0	809.423	0.708	0.959558	119.8	121.5	101.1	17.08	3.19	4.98	10.69	10
	FALSE	High	[K].FSVPGFK.[A]	0.0340796	0.00279243	2	8	28	AAA69899.1; XP_016873759.1	AAA69899.1 [510-516]; XP_016873759.1 [757-763]		0	781.424	0.624	0.788812	99.6	121.1	112.6	8.1	4.87	2.29	12.47	1.47
	FALSE	High	[K].FSVSGAK.[G]	0.122386	0.00894994	2	8	29	AAA69899.1; XP_016873759.1	AAA69899.1 [192-198]; XP_016873759.1 [439-445]		0	695.372	0.927	0.92867	98.9	114.3	94.2	18.28	16.02	20.67	20.28	4.99
	FALSE	High	[K].FSVSGLK.[A]	0.0582215	0.00448662	1	3	20	XP_016873759.1	XP_016873759.1 [3415-3421]		0	737.419	0.703	0.879092	103	115.1	113.7	5.63	8.93	18.98	6.55	4.8
	FALSE	Medium	[K].FTFSGR.[E]	0.531528	0.0470859	1	9	3	XP_016873759.1	XP_016873759.1 [5599-5604]		0	714.357	0.935	0.929589	119	87.3	106.8	8.61	4.04	8.98	5.14	13.84
	FALSE	High	[K].GAKPQGHIGVDASAPQIGGSITGPSVEVQAPDIDVQGPGSK.[L]	5.51323e-16	1.93435e-05	2	8	6	AAA69899.1; XP_016873759.1	AAA69899.1 [141-181]; XP_016873759.1 [388-428]		0	3921.99	0.133	0.728404	95.7	125.4	185.4	20.14	21.45	7.13	28	8.88
	FALSE	High	[K].GDFDVSVPK.[V]	0.00397726	0.000483359	1	10	5	XP_016873759.1	XP_016873759.1 [4798-4806]		0	963.478	0.825	0.930777	136.4	104.7	67.7	9.41	15.22	6.21	11.21	4.54
	FALSE	High	[K].GDLDASVPSMK.[V]	0.00262083	0.000239462	1	9	7	XP_016873759.1	XP_016873759.1 [5246-5256]		0	1119.54	0.56	6.09287e-17		167.1	201.7	71.28	101.77		15.2	5.55
	FALSE	High	[K].GDLDIAGPNLEGDFK.[G]	3.03166e-08	1.93435e-05	1	3	3	XP_016873759.1	XP_016873759.1 [3364-3378]		0	1560.75	0.719	0.960485	119.4	116.4	70.8	5.07	3.06	2.21	18.14	5.51
	FALSE	High	[K].GDINIEGPSMNIEGPDLNVEGPEGGLK.[G]	7.3599e-16	1.93435e-05	1	3	9	XP_016873759.1	XP_016873759.1 [3434-3460]		0	2751.31	0.516	0.945128	114.9	124.3	89.4	20.21	18.13	9.14	6.4	4.81
	FALSE	High	[K].GDISISGPK.[V]	0.00607282	0.000673953	2	8	19	AAA69899.1; XP_016873759.1	AAA69899.1 [408-416]; XP_016873759.1 [655-663]		0	873.468	1.207	0.828951	127.4	79	81.4	5.94	11.7	11.38	5.78	14.15
	FALSE	High	[K].GDMDISLPK.[V]	0.0084612	0.000772347	1	9	5	XP_016873759.1	XP_016873759.1 [4542-4550]		0	975.482	1.1	0.999087	115.7	104.3	54	5.69	11.57	2.55	14.1	12.38
	FALSE	High	[K].GDMDISVPK.[L]	0.00506931	0.000557966	1	9	10	XP_016873759.1	XP_016873759.1 [4468-4476]		0	961.466	1.01	0.997776	125.1	94.4	62.8	3.13	10.03	14.82	7.91	0.64
	FALSE	High	[K].GDMDVSLPK.[V]	0.00457761	0.000502794	1	4	16	XP_016873759.1	XP_016873759.1 [3040-3048]; [3822-3830]		0	961.466	0.934	1	130.6	99.2	65.6	2.63	3.32	7.74	12.15	3.62
	FALSE	High	[K].GDMDVSVPK.[V]	0.00446791	0.000483359	2	7	15	AAA69899.1; XP_016873759.1	AAA69899.1 [1422-1430]; XP_016873759.1 [1669-1677]; [2133-2141]		0	947.45	1.059	0.972557	115.5	92.5	56.6	2.41	14.1	7.1	26.29	5.7
	FALSE	High	[K].GDVDISLPK.[VL]	0.00318266	0.000367025	1	4	7	XP_016873759.1	XP_016873759.1 [2912-2920]; [3492-3500]		0	943.509	8.7	0.000130734	134.2	45.7	48.9	8.75	4.2	6.72	111.23	30.5
	FALSE	High	[K].GDVDVSGPK.[L]	0.0274228	0.00215105	1	3	3	XP_016873759.1	XP_016873759.1 [3242-3250]		0	873.431	1.731	0.850162	143.3	68.3	64.6	10.01	28.45	3.84	20.91	6.63
	FALSE	High	[K].GDVDVSLPEVEGEMK.[V]	1.22171e-07	1.93435e-05	2	6	9	AAA69899.1; XP_016873759.1	AAA69899.1 [1092-1106]; XP_016873759.1 [1339-1353]		0	1603.75	0.777	1	128.6	117.9	54.8	14.17	5.53	4.44	13.2	5.96
	FALSE	High	[K].GDVDVSLPK.[VML]	0.00272477	0.000282962	1	10	25	XP_016873759.1	XP_016873759.1 [2066-2074]; [2528-2536]; [2656-2664]; [3694-3702]; [3950-3958]; [4078-4086]; [4206-4214]; [4334-4342]; [4408-4416]		0	929.494	0.905	0.853906	134.4	95.7	67.5	4.81	7.13	4.09	28.89	13.28
	FALSE	High	[K].GDVDVSVPEVEGK.[L]	1.46878e-05	1.93435e-05	1	4	4	XP_016873759.1	XP_016873759.1 [2402-2414]		0	1329.65	0.01	0.000523197	76.5	393.5				71.52	9.84
	FALSE	High	[K].GDVDVSVPK.[VL]	0.0274228	0.00215105	2	7	4	AAA69899.1; XP_016873759.1	AAA69899.1 [964-972]; XP_016873759.1 [1211-1219]; [1938-1946]		0	915.478	0.913	0.923177	135.4	95.6	56.3	6.98	2.84	3.98	22.95	5.1
	FALSE	High	[K].GDVDVTGPK.[V]	0.00876326	0.000802402	1	4	8	XP_016873759.1	XP_016873759.1 [2784-2792]		0	887.447	1.052	0.990936	116.2	95.1	55.5	2.71	29.1	14.75	9.87	11.52
	FALSE	High	[K].GDVDVTLPK.[V]	0.00669992	0.000722819	1	10	12	XP_016873759.1	XP_016873759.1 [4670-4678]		0	943.509	1.083	0.983129	120.7	95.7	69.1	4.05	7.97	11.16	12.55	2.44
	FALSE	High	[K].GDVPSVGLEGPDVDLQGPEAK.[I]	4.74812e-13	1.93435e-05	1	9	6	XP_016873759.1	XP_016873759.1 [5143-5163]		0	2079.02	0.592	0.962558	128.1	137	51.4	2.76	16.77	5.36	8.6	35.86
	FALSE	High	[K].GDVVVSLPK.[V]	0.00502023	0.000557966	1	4	12	XP_016873759.1	XP_016873759.1 [3620-3628]		0	913.535	0.782	0.707743	69.8	116.8	130.2	8.93	2.68	4.24	8.27	1.46
	FALSE	High	[K].GDYDVTVPK.[V]	0.00431879	0.000483359	2	6	11	AAA69899.1; XP_016873759.1	AAA69899.1 [1220-1228]; XP_016873759.1 [1467-1475]		0	993.489	1.172	0.581013	127.6	66	105.4	22.06	4.58	1.13	6.91	5.76
	FALSE	High	[K].GEETGIDVTLPTGEVTVPGVSGDVSLPEIATGGLEGK.[M]	2.5912e-14	1.93435e-05	2	8	13	AAA69899.1; XP_016873759.1	AAA69899.1 [199-235]; XP_016873759.1 [446-482]		0	3580.81	0.556	0.943032	104.2	103.7	86.2	14.68	8.66	15.62	24.37	8.77
	FALSE	Medium	[K].GEGPDGDVK.[L]	0.179329	0.0125744	1	5	1	XP_016873759.1	XP_016873759.1 [2586-2594]		0	873.395	0.577	0.925519	111.2	124	94.7	2.97	18.35	8.41	22.9	17.28
	FALSE	High	[KE].GEGPDVDVNLPK.[A]	0.000123248	1.93435e-05	1	11	21	XP_016873759.1	XP_016873759.1 [2714-2725]; [2970-2981]; [3752-3763]; [4136-4147]; [4600-4611]		0	1239.62	0.809	0.962301	116	101.7	103.5	2.6	4.72	6.23	8.08	2.17
	FALSE	High	[K].GEGPDVDVSLPK.[A]	1.56799e-05	1.93435e-05	1	10	10	XP_016873759.1	XP_016873759.1 [4728-4739]		0	1212.61	0.768	0.935845	103.5	106.2	109.7	3.86	5.81	2.77	12.81	1.37
	FALSE	High	[K].GEGPDVDVTLPK.[A]	2.17394e-05	1.93435e-05	1	9	13	XP_016873759.1	XP_016873759.1 [4264-4275]		0	1226.63	0.622	0.860423	101.1	123.6	107.1	3.11	5.35	5.99	7.22	3.49
	FALSE	High	[K].GEGPDVHMTLPK.[G]	8.99487e-05	1.93435e-05	2	8	16	AAA69899.1; XP_016873759.1	AAA69899.1 [396-407]; XP_016873759.1 [643-654]		0	1280.63	0.943	0.879528	135.1	93.4	98	12.61	17.85	4.43	14.52	5.26
	FALSE	High	[K].GEGPEFDVNLSK.[A]	8.07344e-06	1.93435e-05	2	7	11	AAA69899.1; XP_016873759.1	AAA69899.1 [766-777]; XP_016873759.1 [1013-1024]		0	1291.62	0.792	0.991382	139.2	123.2	136.3	5.21		4.64	4.98	36.63
	FALSE	High	[K].GEGPEVDMNLPK.[A]	5.31466e-05	1.93435e-05	2	6	10	AAA69899.1; XP_016873759.1	AAA69899.1 [1278-1289]; XP_016873759.1 [1525-1536]		0	1285.61	0.711	0.933693	104.1	116	109.5	3.35	8.11	7.25	13.05	7.78
	FALSE	High	[K].GEGPEVDVK.[L]	0.0165855	0.00142738	2	6	11	AAA69899.1; XP_016873759.1	AAA69899.1 [1150-1158]; XP_016873759.1 [1397-1405]		0	929.457	0.812	0.835545	95.8	113.8	107.6	16.65	18.21	8.12	9.6	7.19
	FALSE	High	[K].GEGPEVDVNLPK.[A]	3.15158e-06	1.93435e-05	2	11	17	AAA69899.1; XP_016873759.1	AAA69899.1 [894-905]; XP_016873759.1 [1141-1152]; [2191-2202]; [3098-3109]; [3880-3891]; [4008-4019]		0	1253.64	0.779	0.975087	115.6	113.6	90.4	5.22	3.83	7.38	16.39	0.61
	FALSE	High	[K].GEGPEVDVTLPK.[A]	8.55571e-05	1.93435e-05	1	3	3	XP_016873759.1	XP_016873759.1 [3550-3561]		0	1240.64	0.746	0.984723	123.8	110.4	88.8	7.84	8.13	7.19	14.37	12.36
	FALSE	High	[K].GEIDASVPELEGDLR.[G]	6.89688e-07	1.93435e-05	2	6	5	AAA69899.1; XP_016873759.1	AAA69899.1 [1550-1564]; XP_016873759.1 [1797-1811]		0	1599.79	0.772	0.991475	129.6	116.7	54.4	10.23	3.86	0.4	14.18	2.95
	FALSE	High	[K].GEVDVDVPK.[L]	0.0236595	0.00186698	1	4	2	XP_016873759.1	XP_016873759.1 [2335-2343]		0	957.489	100	6.09287e-17	103.7	93.1	69.7	26.13	32.66	7.35		7.67
	FALSE	High	[K].GEVDVSLANVEGDLK.[G]	3.665e-06	1.93435e-05	1	3	1	XP_016873759.1	XP_016873759.1 [3168-3182]		0	1544.78	0.83	0.58511	69.8	141.1	79.9	11.59	15.94	6.74	8.8	11.73
	FALSE	Medium	[K].GEYDMTVPK.[L]	0.186544	0.012925	2	7	1	AAA69899.1; XP_016873759.1	AAA69899.1 [715-723]; XP_016873759.1 [962-970]		0	1039.48	0.749	0.984842	120.9	122.8	55.6	7.34	7.14	4.76	6.88	8.17
	FALSE	High	[K].GEYDVTMPK.[V]	0.00359257	0.000427246	2	8	22	AAA69899.1; XP_016873759.1	AAA69899.1 [587-595]; XP_016873759.1 [834-842]		0	1039.48	0.67	0.85613	99.5	112.8	108.8	6.18	25.29	16.71	11.72	3.01
	FALSE	High	[K].GEYDVTVPK.[L]	0.0375144	0.00312024	2	8	4	AAA69899.1; XP_016873759.1	AAA69899.1 [466-474]; XP_016873759.1 [713-721]		0	1007.5	100	6.09287e-17	162.7	61.2	17.4	12.74	5.53	7.03
	FALSE	High	[K].GGADVSGGVSAPDISLGEGHLSVK.[G]	1.38849e-14	1.93435e-05	1	9	9	XP_016873759.1	XP_016873759.1 [5501-5524]		0	2209.11	0.621	0.888744	109.4	125.1	94.1	3.16	0.95	4.84	2.19	9.75
	FALSE	High	[K].GGKPGLTIQAPQLEVSVPSANIEGLEGK.[L]	3.37234e-13	1.93435e-05	2	8	15	AAA69899.1; XP_016873759.1	AAA69899.1 [95-122]; XP_016873759.1 [342-369]		0	2789.5	0.691	0.854639	101.6	119.5	103.3	4.14	4.87	2	14.87	10.36
	FALSE	High	[K].GGQIGLQAPGLSVSGPQGHLESGSGK.[V]	1.19776e-15	1.93435e-05	1	9	15	XP_016873759.1	XP_016873759.1 [5563-5588]		0	2418.24	0.606	0.941194	113.2	113.8	110.1	5.72	5.82	4.43	4.52	7.13
	FALSE	High	[K].GGVDVTLPR.[V]	0.00540065	0.000578698	2	8	5	AAA69899.1; XP_016873759.1	AAA69899.1 [338-346]; XP_016873759.1 [585-593]		0	913.51	0.693	0.882631	108.7	122.3	89	8.04	15.3	11.83	8.28	13.3
	FALSE	High	[R].GGVQVPAVDISSSLGGR.[A]	5.24641e-08	1.93435e-05	1	7	4	XP_016873759.1	XP_016873759.1 [271-287]		0	1598.85	0.643	0.908785	109.3	116.4	104	1.84	2.87	2.74	2.82	4.88
	FALSE	High	[K].GGVTGSPEASISGSK.[G]	1.98388e-06	1.93435e-05	1	8	22	XP_016873759.1	XP_016873759.1 [5659-5673]		0	1333.66	0.821	1	122	109.2	84	12.62	2.72	7.56	17.6	13.67
	FALSE	High	[K].GHYEVTGSDDETGK.[L]	4.17713e-06	1.93435e-05	1	8	12	XP_016873759.1	XP_016873759.1 [5767-5780]		0	1494.63	1.688	0.984723	112.5	95.7	23.3	11.72	23.77	7.81	39.04	29.85
	FALSE	Medium	[K].GKGGVTGSPEASISGSK.[G]	0.533167	0.04735	1	8	1	XP_016873759.1	XP_016873759.1 [5657-5673]		1	1518.78	100	6.09287e-17	156		119.1	33.3	35.64	20.74		89.28
	FALSE	High	[K].GKKPDIDITGPK.[V]	3.23323e-05	1.93435e-05	1	3	16	XP_016873759.1	XP_016873759.1 [3306-3317]		1	1268.72	0.746	0.657929	75	110.6	133.4	6.76	28.96	21.19	9.78	13.73
	FALSE	High	[K].GNVDISAPK.[I]	0.00550706	0.000596903	2	6	10	AAA69899.1; XP_016873759.1	AAA69899.1 [836-844]; XP_016873759.1 [1083-1091]		0	900.479	0.651	6.09287e-17		168.8	111.6	3.89	6.18		17.73	10.42
	FALSE	High	[K].GPAFNMASPESDFGINLK.[G]	7.20924e-13	1.93435e-05	1	9	3	XP_016873759.1	XP_016873759.1 [5478-5495]		0	1894.9
	FALSE	High	[K].GPAFNMASPESDFGINLK.[G]	2.50279e-11	1.93435e-05	1	9	1	XP_016873759.1	XP_016873759.1 [5478-5495]		0	1910.9	100	6.09287e-17	249			29.1	70.54
	FALSE	Medium	[K].GPALDIK.[G]	0.308099	0.0219837	1	3	22	XP_016873759.1	XP_016873759.1 [3183-3189]		0	713.419	0.728	0.957483	117.1	98.8	97.1	22.55	5.3	9.87	21.78	5.48
	FALSE	High	[RHQ].GPDWHLK.[M]	0.0151895	0.00132206	1	6	6	XP_016873759.1	XP_016873759.1 [742-748]; [870-876]; [1247-1253]; [1375-1381]; [1503-1509]; [1974-1980]; [2169-2175]; [2564-2570]; [2692-2698]; [2820-2826]; [2948-2954]; [3076-3082]; [3528-3534]; [3730-3736]; [3858-3864]; [3986-3992]; [4114-4120]; [4242-4248]; [4578-4584]; [4706-4712]		0	852.436	1.416	0.850578	102.6	81.4	78.9	5.87	2.88	1.86	3.94	0.55
	FALSE	Medium	[K].GPEADIK.[G]	0.382663	0.0291555	1	10	8	XP_016873759.1	XP_016873759.1 [4685-4691]		0	729.378	1.109	0.988108	108.3	105.8	96.9	24.69	3.96	12.03	2.17	13.07
	FALSE	Medium	[K].GPEIDIK.[G]	0.313456	0.0223361	2	12	15	XP_005267356.1; XP_016873759.1	XP_005267356.1 [1328-1334]; [2153-2159]; [3803-3809]; XP_016873759.1 [4349-4355]		0	771.425	0.883	0.929822	135.4	91.2	88.6	35.86	5.25	2.84	38.74	1.97
	FALSE	Medium	[K].GPEIDVK.[AG]	0.432947	0.034793	2	6	1	AAA69899.1; XP_016873759.1	AAA69899.1 [1363-1369]; XP_016873759.1 [1610-1616]; [2276-2282]		0	757.409
	FALSE	High	[K].GPEVDIEGPEGK.[L]	1.0175e-05	1.93435e-05	1	9	13	XP_016873759.1	XP_016873759.1 [4423-4434]		0	1226.59	1.073	0.752045	133.6	77.5	70.3	15.09	8.27	14.78	18.09	6.01
	FALSE	Medium	[K].GPEVDIK.[G]	0.281066	0.0197566	1	10	34	XP_016873759.1	XP_016873759.1 [2543-2549]; [2671-2677]; [2799-2805]; [3507-3513]; [3635-3641]; [3709-3715]; [4093-4099]; [4221-4227]; [4813-4819]		0	757.409	1.168	0.762495	121	88.1	99.8	17.42	2.14	11.29	13.58	1.87
	FALSE	Medium	[K].GPEVDIR.[DG]	0.267631	0.0187835	1	9	17	XP_016873759.1	XP_016873759.1 [2927-2933]; [4557-4563]		0	785.415	100	6.09287e-17	195.4	12	24	14.86	7.59	8.82		16.79
	FALSE	High	[K].GPFVEAEVPDVDLECPDAK.[L]	1.23675e-14	1.93435e-05	1	5	15	XP_016873759.1	XP_016873759.1 [1819-1837]		0	2087.95	0.726	0.879704	101.6	118.6	102.2	4.85	6.48	4.66	5	14.13
	FALSE	High	[K].GPGVDLPSVNLSMPK.[V]	1.18319e-08	1.93435e-05	1	9	5	XP_016873759.1	XP_016873759.1 [5215-5229]		0	1510.79	0.712	0.934255	105.1	117	96.7	5.54	2.22	3.36	1.22	2.87
	FALSE	High	[K].GPGVDVNLK.[G]	0.00338967	0.000409513	1	9	23	XP_016873759.1	XP_016873759.1 [5368-5376]		0	898.499	0.676	0.901136	107	115	103.3	27.87	6.44	3.07	15.57	15.94
	FALSE	High	[K].GPHVDVSGPDIDIEGPEGK.[L]	2.91987e-12	1.93435e-05	1	4	14	XP_016873759.1	XP_016873759.1 [2350-2368]		0	1917.92	0.646	0.950883	111.2	124.2	98.8	20.25	13.79	3.64	7.91	12.61
	FALSE	High	[K].GPQITGPSLEGDLGLK.[G]	1.73985e-09	1.93435e-05	2	8	14	AAA69899.1; XP_016873759.1	AAA69899.1 [125-140]; XP_016873759.1 [372-387]		0	1581.85	0.773	1	119.5	116.5	74.5	10.14	2.83	7.49	12.97	4.21
	FALSE	Medium	[KR].GPQVDVK.[G]	0.214532	0.0149056	3	9	22	XP_005267356.1; AAA69899.1; XP_016873759.1	XP_005267356.1 [998-1004]; [4133-4139]; [4463-4469]; AAA69899.1 [1565-1571]; XP_016873759.1 [1812-1818]		0	742.409	0.885	0.576928	139.5	95.9	92.5	4.87	25.42	29.71	20.97	19.91
	FALSE	High	[K].GPQVSGELK.[G]	0.00375266	0.000427246	1	9	13	XP_016873759.1	XP_016873759.1 [5359-5367]		0	914.494	0.755	0.997664	123.8	106.8	82.9	7.17	16.87	3.98	33.91	5.35
	FALSE	High	[K].GPQVSSALNLDTSK.[F]	2.83065e-07	1.93435e-05	1	9	13	XP_016873759.1	XP_016873759.1 [5532-5545]		0	1416.73	0.418	0.953485	118	140.2	104.3	7.56	2.07	15.91	20.45	3.12
	FALSE	High	[K].GPSLDIDTPDVNIEGPEGK.[L]	3.8295e-15	1.93435e-05	1	9	9	XP_016873759.1	XP_016873759.1 [4356-4374]		0	1952.94	0.652	0.860773	107.2	123.9	101.9	5.1	3.79	2.57	6.07	4.07
	FALSE	High	[R].GPSLQGDLAVSGDIK.[C]	9.27614e-10	1.93435e-05	1	9	22	XP_016873759.1	XP_016873759.1 [5300-5314]		0	1456.76	0.01	0.910378	110.7	86.1	84.6		2.85	13.38	11.96	12.77
	FALSE	High	[K].GPTVGGGLPGIGVQGLEGNLQMPGIK.[S]	8.03902e-16	1.93435e-05	1	8	14	XP_016873759.1	XP_016873759.1 [5406-5431]		0	2446.31	0.484	0.839666	107.3	134.1	97.6	35.92	21.06	7.99	6.77	15.81
	FALSE	High	[K].GPTVGGGLPGIGVQGLEGNLQMPGIK.[S]	1.75097e-11	1.93435e-05	1	8	5	XP_016873759.1	XP_016873759.1 [5406-5431]		0	2462.31	3.5	0.909976	105.6	49.5	128.4	45.25	83.46	54.92	93.82
	FALSE	High	[K].GSEVGFHGAAPDISVK.[G]	1.03619e-09	1.93435e-05	1	9	21	XP_016873759.1	XP_016873759.1 [5462-5477]		0	1570.79	1.241	0.760435	112.7	76.7	96.4	10.54	11.49	7.55	26.48	8.89
	FALSE	High	[K].GSLGATGEIK.[G]	0.0313022	0.0025594	1	9	3	XP_016873759.1	XP_016873759.1 [5396-5405]		0	932.505
	FALSE	High	[R].HELTEISNVDVETQSGK.[T]	7.36324e-16	1.93435e-05	1	5	8	XP_016873759.1	XP_016873759.1 [187-203]		0	1885.91	0.939	0.96816	119.2	93.6	103	15.43	7.52	18.37	7.98	0.52
	FALSE	High	[K].KPDIDITGPK.[V]	7.10826e-07	1.93435e-05	1	3	14	XP_016873759.1	XP_016873759.1 [3308-3317]		0	1083.6	0.994	0.831584	138.5	84.8	71.4	11.83	3.99	5.24	16.37	26.06
	FALSE	High	[K].LDADMPEVAVEGPNGK.[W]	1.0862e-08	1.93435e-05	1	4	11	XP_016873759.1	XP_016873759.1 [2286-2301]		0	1641.78	8.769	6.09287e-17	115.6	118.3	80.2	0.75	16.04	9.91		16.8
	FALSE	High	[R].LDFEGPDAK.[L]	0.0127534	0.00111106	1	10	6	XP_016873759.1	XP_016873759.1 [4823-4831]		0	991.473	0.903	0.990686	129.7	108.4	76	20.81	13.48	3.66	27.32	2.32
	FALSE	High	[K].IDVDAPDIDIHGPDAK.[L]	5.44177e-10	1.93435e-05	1	3	23	XP_016873759.1	XP_016873759.1 [3193-3208]		0	1690.83	0.936	0.966784	112.6	97	98.8	8.19	6.63	8.72	7.21	7.65
	FALSE	High	[K].IDVTAPDVSIEEPEGK.[L]	1.29297e-09	1.93435e-05	2	8	11	AAA69899.1; XP_016873759.1	AAA69899.1 [538-553]; XP_016873759.1 [785-800]		0	1698.84	0.705	0.974931	119.4	111.3	91.7	1.53	7.83	1.06	9.24	4.93
	FALSE	High	[K].LEGDLTGPSVDVEVPDVELECPDAK.[L]	6.42383e-16	1.93435e-05	1	5	9	XP_016873759.1	XP_016873759.1 [2075-2099]		0	2684.25	0.735	0.897007	108.2	124.1	93.6	9.2	6.65	11.77	7.44	11.44
	FALSE	High	[K].LEGDLTGPSVGVEVPDVELECPDAK.[L]	6.67408e-16	1.93435e-05	2	7	14	AAA69899.1; XP_016873759.1	AAA69899.1 [1633-1657]; XP_016873759.1 [1880-1904]		0	2626.24	0.734	0.811193	94.2	125.2	116.5	8.14	18.68	11.74	5.4	8.6
	FALSE	High	[K].LEGELQAPDLELSLPAIHVEGLDIK.[A]	2.24354e-13	1.93435e-05	1	10	10	XP_016873759.1	XP_016873759.1 [5046-5070]		0	2699.45	1.206	0.691363	155.9	93.6		15.53	13.32	4.7	19.27
	FALSE	High	[K].IEGEMQVPDVDIR.[G]	5.67575e-09	1.93435e-05	2	6	10	AAA69899.1; XP_016873759.1	AAA69899.1 [845-857]; XP_016873759.1 [1092-1104]		0	1500.74		6.09287e-17	149.4		155.2		4.32	1.41		16.12
	FALSE	High	[K].LEGGEVDLK.[G]	0.00347279	0.000427246	1	10	12	XP_016873759.1	XP_016873759.1 [4870-4878]		0	959.504	0.647	0.858677	103.5	121.6	86.2	4.76	10.4	5.8	23.71	5.97
	FALSE	High	[K].LEGPDVSLK.[G]	0.00160162	0.000154191	1	9	25	XP_016873759.1	XP_016873759.1 [5206-5214]		0	957.525	0.772	0.958445	109.9	112.6	94.3	4.24	7.79	14.17	9.96	6.36
	FALSE	High	[K].LEVPDMNIR.[G]	0.00224273	0.000195525	1	4	5	XP_016873759.1	XP_016873759.1 [2415-2423]		0	1086.56	0.648	0.964509	110.3	110.5	114.2	5.78	6.76	1.5	25.67	10.83
	FALSE	High	[K].IGFSGPK.[L]	0.0785496	0.00584861	1	10	9	XP_016873759.1	XP_016873759.1 [4863-4869]		0	705.393	0.865	0.996148	113	107.8	89.2	24.7	8.79	28.24	19.1	47.18
	FALSE	High	[K].IGIPGVK.[M]	0.138234	0.00989767	1	9	13	XP_016873759.1	XP_016873759.1 [5174-5180]		0	683.445	0.89	0.99076	93.2	120.9	98.3	17.73	8.61	40.28	18.56	49.53
	FALSE	Medium	[K].IHMSGPK.[I]	0.144882	0.0103425	1	10	5	XP_016873759.1	XP_016873759.1 [4961-4967]		0	769.403	0.516	0.833512	79.1	119.2	117.8	38.57	23.45	15.53	28.79	0.99
	FALSE	High	[K].IKFPTMK.[V]	0.0287588	0.00228959	2	8	16	AAA69899.1; XP_016873759.1	AAA69899.1 [57-63]; XP_016873759.1 [304-310]		1	864.501	0.685	0.925761	96.4	117.4	118.5	22.39	17.44	10.86	11.6	11.39
	FALSE	High	[K].IKGDVDVSAPK.[L]	0.000110421	1.93435e-05	1	4	9	XP_016873759.1	XP_016873759.1 [2259-2269]		1	1128.63	0.813	0.958177	97.5	95.3	138.6	5.07	9.26	8.26	13.77	4.32
	FALSE	High	[K].LKGDVDVSGPK.[L]	0.000114352	1.93435e-05	1	3	19	XP_016873759.1	XP_016873759.1 [3240-3250]		1	1114.61	0.615	0.960628	113.9	108.4	116.6	3.09	8.18	6.04	8.64	7.74
	FALSE	High	[K].LKGDVDVSLPEVEGEMK.[V]	3.53034e-10	1.93435e-05	2	6	14	AAA69899.1; XP_016873759.1	AAA69899.1 [1090-1106]; XP_016873759.1 [1337-1353]		1	1844.93	0.498	0.734092	111.3	133.1	103.2	25.91	32.08	19.82	15.95	15.11
	FALSE	High	[K].LKGDVDVSLPEVEGEMK.[V]	4.38307e-10	1.93435e-05	2	6	3	AAA69899.1; XP_016873759.1	AAA69899.1 [1090-1106]; XP_016873759.1 [1337-1353]		1	1860.93	1.881	0.987379	109.1	92	47.8	9.62	69.8	44.45	79.19	78.69
	FALSE	High	[K].IKGDVDVSVPEVEGK.[L]	3.26932e-08	1.93435e-05	1	4	10	XP_016873759.1	XP_016873759.1 [2400-2414]		1	1570.83	0.743	0.956666	110.8	94.1	130.9	12.18	8.73	11.99	19.62	15.92
	FALSE	High	[K].IKGDVDVTGPK.[V]	0.000110421	1.93435e-05	1	4	14	XP_016873759.1	XP_016873759.1 [2782-2792]		1	1128.63	0.773	0.906798	81.3	103.7	141.4	7.66	12.65	8.34	21.47	11.72
	FALSE	High	[K].IKGDVPSVGLEGPDVDLQGPEAK.[I]	1.37897e-15	1.93435e-05	1	9	15	XP_016873759.1	XP_016873759.1 [5141-5163]		1	2320.2	0.65	0.856006	91.3	111.8	137.8	10.71	9.09	6.95	11.77	1.28
	FALSE	High	[K].LKGEIDASVPELEGDLR.[G]	2.09586e-09	1.93435e-05	2	6	4	AAA69899.1; XP_016873759.1	AAA69899.1 [1548-1564]; XP_016873759.1 [1795-1811]		1	1840.97	100	6.09287e-17	128.2				1.27	6.54
	FALSE	Medium	[K].LKGPDVK.[L]	0.292427	0.0206869	2	8	4	AAA69899.1; XP_016873759.1	AAA69899.1 [433-439]; XP_016873759.1 [680-686]		1	756.461	1.201	0.991058	92	86.3	96.9	8.48	5.34	4.08	20.68	20.36
	FALSE	High	[K].LKGPQITGPSLEGDLGLK.[G]	2.32203e-08	1.93435e-05	2	8	12	AAA69899.1; XP_016873759.1	AAA69899.1 [123-140]; XP_016873759.1 [370-387]		1	1823.03	3.818	0.0046457	122.3	21.8	150	13.22	5.57	5.39	116.11	65.95
	FALSE	High	[K].LKMPDMHVNMPK.[I]	0.00017472	4.2772e-05	1	3	4	XP_016873759.1	XP_016873759.1 [3214-3225]		1	1440.72	0.01	6.09287e-17		106.3	369.1				49.15	10.7
	FALSE	High	[K].LKMPEMHFK.[A]	0.020108	0.00164369	1	5	1	XP_016873759.1	XP_016873759.1 [2038-2046]		1	1160.6	0.303	0.0218349	40	115.2	269.6	28.72	18.19		34.86	70.67
	FALSE	High	[K].LKMPEMNIK.[A]	0.00230926	0.000195525	1	5	4	XP_016873759.1	XP_016873759.1 [2500-2508]		1	1103.6	0.652	0.994054	76.1	78.1	228.4	32.36	16.56	11.11	42.96	5.13
	FALSE	High	[R].LKSEDGVEGDLGETQSR.[T]	0.000254946	4.2772e-05	1	6	3	XP_016873759.1	XP_016873759.1 [133-149]		1	1819.87	0.01	6.09287e-17		261.2	238.8				29.32	46.86
	FALSE	High	[K].LKTDVDVSLPK.[V]	0.00710885	0.000722819	2	6	8	AAA69899.1; XP_016873759.1	AAA69899.1 [1346-1356]; XP_016873759.1 [1593-1603]		1	1214.7	0.751	0.965368	95.6	95.2	147.1	5.03	15.93	21.23	13.44	4.16
	FALSE	Medium	[K].LNIEGK.[S]	0.382663	0.0291555	1	3	31	XP_016873759.1	XP_016873759.1 [3274-3279]		0	673.388	1.065	0.96655	109.5	89.1	93	19.96	6.39	18.41	34.15	10.63
	FALSE	High	[K].LNVGAPDVTLR.[G]	0.000151976	4.2772e-05	1	9	14	XP_016873759.1	XP_016873759.1 [5289-5299]		0	1154.65	0.665	0.944653	112.4	119.7	108.3	6.23	7.2	2.41	10.64	3.58
	FALSE	High	[K].LPDMSVK.[T]	0.0743023	0.00543736	2	8	22	AAA69899.1; XP_016873759.1	AAA69899.1 [440-446]; XP_016873759.1 [687-693]		0	789.418	0.752	0.987247	123.2	103.9	91.5	4.7	7.68	3.25	15.86	18.26
	FALSE	High	[K].IPEMHLK.[A]	0.0316361	0.00257416	1	4	7	XP_016873759.1	XP_016873759.1 [3668-3674]		0	867.476	1.003	0.949769	84.2	109.5	107.3	17.91	10.95	6.12	24.94	13.4
	FALSE	High	[K].IPMPDFDLHLK.[G]	5.12544e-07	1.93435e-05	1	4	14	XP_016873759.1	XP_016873759.1 [2896-2906]		0	1325.69	0.402	0.807057	107.8	130.2	116.1	35.85	11.16	7.81	2.61	10.77
	FALSE	High	[K].IPMPDFDLHLK.[G]	6.70247e-06	1.93435e-05	1	4	3	XP_016873759.1	XP_016873759.1 [2896-2906]		0	1341.69	2.822	0.687552	110.6	60.9	58.4	44.51	72.21	42.48	78.21	65.96
	FALSE	High	[K].LPQFGISTPGSDLHVNAK.[G]	4.07742e-11	1.93435e-05	1	9	11	XP_016873759.1	XP_016873759.1 [5341-5358]		0	1880.99	0.696	0.955363	118.7	114.6	90.1	9.44	5.68	4.1	3.45	4.61
	FALSE	High	[R].LPSGSGAASPTGSAVDIR.[A]	1.18418e-13	1.93435e-05	1	6	16	XP_016873759.1	XP_016873759.1 [208-225]		0	1642.84	0.71	0.970111	122.6	100.6	102.1	6.93	3.02	5.32	0.59	2.43
	FALSE	High	[K].LPTGQISGPEIK.[G]	1.67738e-07	1.93435e-05	1	9	18	XP_016873759.1	XP_016873759.1 [5446-5457]		0	1239.69	0.678	0.950306	112.2	115.3	96.9	13.58	12.68	3.61	6.62	4.6
	FALSE	High	[K].LQGSGVSLASK.[K]	0.000679618	9.10162e-05	1	8	5	XP_016873759.1	XP_016873759.1 [5781-5791]		0	1046.58	0.743	0.590742	173.5	82.8	46.5	11.72	13.65	9.03	18.79	12.11
	FALSE	High	[K].LQVTMPGIK.[V]	0.00184523	0.000154191	1	6	12	XP_016873759.1	XP_016873759.1 [244-252]		0	986.57	0.662	0.935771	115	120.8	100.9	9.78	16.64	4.23	17.35	2.84
	FALSE	High	[R].ISAPNVDFNLEGPK.[V]	2.31463e-07	1.93435e-05	1	9	5	XP_016873759.1	XP_016873759.1 [5380-5393]		0	1500.77	0.721	0.974464	110.4	111.9	98.3	7.49	2.23	2.21	2.23	2.16
	FALSE	High	[K].ISIPDVDLDLK.[G]	2.08826e-05	1.93435e-05	1	10	10	XP_016873759.1	XP_016873759.1 [4782-4792]		0	1227.68	100	6.09287e-17	256.7			145.74	84.45	4.09
	FALSE	High	[K].ISIPDVDLDLKGPK.[V]	2.76916e-08	1.93435e-05	1	10	3	XP_016873759.1	XP_016873759.1 [4782-4795]		1	1509.85	0.01	6.09287e-17		92.7	407.3					11.04
	FALSE	High	[K].ISIPDVGLHLK.[G]	2.07779e-05	1.93435e-05	2	6	15	AAA69899.1; XP_016873759.1	AAA69899.1 [1204-1214]; XP_016873759.1 [1451-1461]		0	1191.71	0.637	0.86934	109.9	124.5	100.9	9.48	7.83	9.38	6.19	3.19
	FALSE	High	[K].ISMPDFDLHLK.[G]	4.11456e-06	1.93435e-05	1	10	15	XP_016873759.1	XP_016873759.1 [2512-2522]; [3934-3944]; [4190-4200]; [4392-4402]		0	1315.67	0.537	0.928661	106	120.6	114.8	15.37	2.45	1.27	10.39	2.55
	FALSE	High	[K].ISMPDFDLHLK.[G]	0.00046689	4.2772e-05	1	10	6	XP_016873759.1	XP_016873759.1 [2512-2522]; [3934-3944]; [4190-4200]; [4392-4402]		0	1331.67	2	1.11652e-06	86.9	99.1	98.6	27.08	18.82		64.52	51.42
	FALSE	High	[K].ISMPDFDLNLK.[G]	2.37976e-05	1.93435e-05	1	4	3	XP_016873759.1	XP_016873759.1 [3604-3614]		0	1292.66	0.639	0.866738	106	119.4	111.3	13.67	5.94	1.83	10.93	3.93
	FALSE	High	[K].ISMPDIDFNLK.[G]	4.71169e-05	1.93435e-05	1	9	13	XP_016873759.1	XP_016873759.1 [4318-4328]		0	1292.66	0.639	0.866738	106	119.4	111.3	13.67	5.94	1.83	10.93	3.93
	FALSE	High	[K].ISMPDLDLHLK.[S]	4.14912e-07	1.93435e-05	1	4	15	XP_016873759.1	XP_016873759.1 [2319-2329]		0	1281.69	0.564	0.986611	119.6	112.4	110.7	10.77	8.54	5.82	8.89	4.04
	FALSE	High	[K].ISMPDLDLHLK.[S]	0.0267083	0.00211867	1	4	1	XP_016873759.1	XP_016873759.1 [2319-2329]		0	1297.68
	FALSE	High	[K].ISMPDIDLNLK.[G]	8.03294e-06	1.93435e-05	1	10	21	XP_016873759.1	XP_016873759.1 [2640-2650]; [3024-3034]; [3152-3162]; [3476-3486]; [3678-3688]; [3806-3816]; [4654-4664]		0	1258.67	0.673	0.977514	112.1	108	103.5	5.47	1.58	3.26	7.65	12.18
	FALSE	High	[K].ISMPDIDLNLK.[G]	8.81658e-05	1.93435e-05	1	10	9	XP_016873759.1	XP_016873759.1 [2640-2650]; [3024-3034]; [3152-3162]; [3476-3486]; [3678-3688]; [3806-3816]; [4654-4664]		0	1274.67	1.521	0.885947	122	76.9	81.7	37.22	48.04	29.64	22.23	34.81
	FALSE	High	[K].ISMPDIDLNLKGPK.[VM]	3.21441e-09	1.93435e-05	1	10	1	XP_016873759.1	XP_016873759.1 [2640-2653]; [3024-3037]; [3152-3165]; [3476-3489]; [3678-3691]; [3806-3819]; [4654-4667]		1	1540.84	0.01	6.09287e-17		107.8	359.5		42.12		40.94	15.99
	FALSE	High	[K].ISMPDIDLNLTGPK.[I]	2.09676e-06	1.93435e-05	1	4	1	XP_016873759.1	XP_016873759.1 [2768-2781]		0	1529.79		6.09287e-17	500
	FALSE	High	[K].ISMPDVDFNLK.[G]	7.51117e-05	1.93435e-05	1	4	13	XP_016873759.1	XP_016873759.1 [2245-2255]		0	1278.64	0.696	0.954634	109.8	112.9	102.5	8.91	1.51	3.36	5.18	0.74
	FALSE	High	[K].ISMPDVDLHLK.[G]	0.000184552	4.2772e-05	2	9	15	AAA69899.1; XP_016873759.1	AAA69899.1 [571-581]; [948-958]; [1406-1416]; [1608-1618]; XP_016873759.1 [818-828]; [1195-1205]; [1653-1663]; [1855-1865]; [1922-1932]; [2050-2060]		0	1267.67	0.485	0.984113	120.1	126.7	97.8	17.71	11.57	2.86	2.66	7.56
	FALSE	High	[K].ISMPDVDLHLK.[G]	0.000151221	4.2772e-05	2	9	3	AAA69899.1; XP_016873759.1	AAA69899.1 [571-581]; [948-958]; [1406-1416]; [1608-1618]; XP_016873759.1 [818-828]; [1195-1205]; [1653-1663]; [1855-1865]; [1922-1932]; [2050-2060]		0	1283.67	1.133	0.954392	114.1	84.7	127.5	21.92	25.01	17.62	58.32	21.91
	FALSE	High	[K].ISMPDVDLHMK.[G]	0.000368073	4.2772e-05	2	7	14	AAA69899.1; XP_016873759.1	AAA69899.1 [699-709]; XP_016873759.1 [946-956]		0	1285.63	0.65	0.885866	100.7	116.2	121.5	15.57	5.2	8.29	9.42	7.78
	FALSE	High	[K].ISMPDVDLHMK.[G]	0.000624979	6.84312e-05	2	7	4	AAA69899.1; XP_016873759.1	AAA69899.1 [699-709]; XP_016873759.1 [946-956]		0	1301.62	1.136	0.920491	115.1	70.6	125.8	34.36	40.54	8.68	16.35	22.91
	FALSE	High	[K].ISMPDVDLHVK.[G]	0.00022855	4.2772e-05	2	8	8	AAA69899.1; XP_016873759.1	AAA69899.1 [450-460]; XP_016873759.1 [697-707]		0	1253.66	0.656	0.940642	111.5	114.1	115.7	4.9	5.86	5.53	3.65	14.04
	FALSE	High	[KN].ISMPDVDLNLK.[G]	2.69831e-05	1.93435e-05	2	6	15	AAA69899.1; XP_016873759.1	AAA69899.1 [1076-1086]; XP_016873759.1 [1323-1333]; [2386-2396]		0	1244.66	0.746	0.989505	125.7	110.1	77.9	7.29	4.01	0.94	10.53	3.41
	FALSE	High	[K].ISMPDVGLNLK.[A]	0.000217468	4.2772e-05	2	6	12	AAA69899.1; XP_016873759.1	AAA69899.1 [1332-1342]; XP_016873759.1 [1579-1589]		0	1186.65	0.695	0.941872	109	110	106.8	4.04	2.96	2.35	6.97	3
	FALSE	High	[K].ISMPDVNLNLK.[G]	7.21607e-05	1.93435e-05	1	5	11	XP_016873759.1	XP_016873759.1 [2117-2127]		0	1243.67	0.694	0.945279	111.5	110.8	102.5	3.99	4.24	1.79	6.27	1.83
	FALSE	High	[K].ISMPEIDLNLK.[G]	0.000328393	4.2772e-05	1	3	2	XP_016873759.1	XP_016873759.1 [3226-3236]		0	1272.69	0.723	0.974659	113.5	110.7	99.2	13	2.84	0.8	7.9	3.66
	FALSE	High	[K].ISMPEVDLNLK.[G]	8.38608e-05	1.93435e-05	1	9	12	XP_016873759.1	XP_016873759.1 [4062-4072]; [4526-4536]		0	1258.67	0.639	0.938036	113.7	116.6	94.9	7.53	3.32	1.22	3.67	1.54
	FALSE	High	[K].ISMPEVDLNLK.[G]	0.00244824	0.000195525	1	9	6	XP_016873759.1	XP_016873759.1 [4062-4072]; [4526-4536]		0	1274.67	1.37	0.950876	115.9	87.2	98	18.92	43.19	50.11	35.65	19.87
	FALSE	High	[K].ISMPGFK.[G]	0.0560213	0.00438639	1	6	23	XP_016873759.1	XP_016873759.1 [2707-2713]; [3091-3097]; [3873-3879]		0	779.412	1.017	0.995725	112.9	100.4	85.1	15.3	11.58	12.45	7.54	12.4
	FALSE	High	[K].ISMPGFKGEGPEVDVNLPK.[A]	4.45944e-06	1.93435e-05	1	6	2	XP_016873759.1	XP_016873759.1 [3091-3109]; [3873-3891]		1	2014.03					500					6.96
	FALSE	High	[K].ISMQDVDLSLGSPK.[L]	1.17943e-07	1.93435e-05	2	8	6	AAA69899.1; XP_016873759.1	AAA69899.1 [253-266]; XP_016873759.1 [500-513]		0	1489.76	0.702	0.925304	116.5	111.5	100.8	12.7	5.16	16.54	8.09	10.23
	FALSE	High	[R].ISMSEVDLNVAAPK.[V]	9.17094e-08	1.93435e-05	2	8	1	AAA69899.1; XP_016873759.1	AAA69899.1 [322-335]; XP_016873759.1 [569-582]		0	1489.76	0.01	0.994019	67.2	83.7	174.5		22.56	22.53	28.16	107.92
	FALSE	High	[K].MDAEVPDVNIEGPDAK.[L]	4.729e-07	1.93435e-05	2	6	9	AAA69899.1; XP_016873759.1	AAA69899.1 [1171-1186]; XP_016873759.1 [1418-1433]		0	1699.78	0.77	0.98585	120.5	101	100.6	3.22	3.1	4.8	6.45	3.71
	FALSE	High	[K].MDAEVPDVNIEGPDAK.[L]	6.36343e-07	1.93435e-05	2	6	2	AAA69899.1; XP_016873759.1	AAA69899.1 [1171-1186]; XP_016873759.1 [1418-1433]		0	1715.78	0.278	0.358145	93.1	205.7	77.5	56.5	31.09	15.38	5.74	14.23
	FALSE	High	[K].MDIDAPDVDVHGPDWHLK.[M]	2.96578e-09	1.93435e-05	1	5	12	XP_016873759.1	XP_016873759.1 [1963-1980]		0	2059.95	0.3	0.903014	128.6	137.3	83.4	39.28	5.86	6.74	20.46	35.53
	FALSE	High	[K].MDIDAPDVDVHGPDWHLK.[M]	2.5986e-07	1.93435e-05	1	5	7	XP_016873759.1	XP_016873759.1 [1963-1980]		0	2075.95	2.198	0.82432	91.7	69.3	75.8	46.62	28.81	29.76	64.7	67.05
	FALSE	High	[K].MDIDAPDVEVQGPDWHLK.[M]	1.37091e-10	1.93435e-05	2	6	15	AAA69899.1; XP_016873759.1	AAA69899.1 [989-1006]; XP_016873759.1 [1236-1253]		0	2064.97	0.47	0.877503	109.6	127.1	107.4	28.03	18.89	7.06	6.71	13.97
	FALSE	High	[K].MDIDAPDVEVQGPDWHLK.[M]	4.68951e-06	1.93435e-05	2	6	8	AAA69899.1; XP_016873759.1	AAA69899.1 [989-1006]; XP_016873759.1 [1236-1253]		0	2080.96	1.594	0.613597	125.6	49.9	221.7	30.64		50.27	32.98	48.64
	FALSE	High	[K].MDIDVPDVEVQGPDWHLK.[M]	4.22358e-11	1.93435e-05	2	8	10	AAA69899.1; XP_016873759.1	AAA69899.1 [612-629]; XP_016873759.1 [859-876]		0	2093	0.01	0.86811	119.4	137.1	114.1		8.69	6.58	6.25	72.93
	FALSE	High	[K].MDIDVPDVEVQGPDWHLK.[M]	2.04757e-08	1.93435e-05	2	8	4	AAA69899.1; XP_016873759.1	AAA69899.1 [612-629]; XP_016873759.1 [859-876]		0	2109	1.185	0.995044	103.9	91.5	79.2	5.97	11.24	6.98	5.11	7.08
	FALSE	High	[K].MDVNVGDIDIEGPEGK.[L]	6.99839e-10	1.93435e-05	2	6	15	AAA69899.1; XP_016873759.1	AAA69899.1 [1373-1388]; XP_016873759.1 [1620-1635]		0	1687.78	0.544	0.862693	105.6	129.1	101.9	6.99	8.41	1.23	7.77	4.71
	FALSE	High	[K].MDVNVGDIDIEGPEGK.[L]	2.41395e-06	1.93435e-05	2	6	3	AAA69899.1; XP_016873759.1	AAA69899.1 [1373-1388]; XP_016873759.1 [1620-1635]		0	1703.78
	FALSE	Medium	[K].MEGDLKAPEVDIK.[G]	0.294998	0.0209977	1	7	1	XP_016873759.1	XP_016873759.1 [3959-3971]		1	1444.74	100				392.3					15.19
	FALSE	High	[K].MEGGGAEVHAQLPSLEGDLR.[G]	1.31682e-10	1.93435e-05	1	9	14	XP_016873759.1	XP_016873759.1 [5181-5200]		0	2066	1.103	0.308892	73.4	129.5	114.2	48.82	19.7	24.1	41.5	43.07
	FALSE	High	[K].MEGGGAEVHAQLPSLEGDLR.[G]	5.37735e-11	1.93435e-05	1	9	9	XP_016873759.1	XP_016873759.1 [5181-5200]		0	2081.99	1.383	0.917442	123.6	77.6	96.3	32	92.76	31.86	28.69	31.05
	FALSE	High	[-].MEKEETTR.[E]	0.0142051	0.00123418	1	8	9	XP_016873759.1	XP_016873759.1 [1-8]	XP_016873759.1 1xAcetyl [N-Term]	1	1065.49	0.353	0.298658	55.9	147.7	207.8	24.82	38.28	53.4	15.74	11.27
	FALSE	High	[K].MKGDVDVSLPK.[V]	4.57192e-05	1.93435e-05	1	9	12	XP_016873759.1	XP_016873759.1 [4076-4086]		1	1188.63	0.211	0.127619	50.9	166	196.3	45.67	4.26	29.92	21.98	15
	FALSE	High	[K].MKGDVVVSLPK.[V]	0.000128913	1.93435e-05	1	4	2	XP_016873759.1	XP_016873759.1 [3618-3628]		1	1172.67	0.253	1	109.5	115.6	161.8	76.67	44.11	15.05	24.47	4.86
	FALSE	High	[K].MKGDYDVTVPK.[V]	2.48355e-07	1.93435e-05	2	6	9	AAA69899.1; XP_016873759.1	AAA69899.1 [1218-1228]; XP_016873759.1 [1465-1475]		1	1252.62	0.51	0.757565	80.4	126.8	145	18.77	6.93	3.65	23.69	4.97
	FALSE	High	[K].MKLPQFGISTPGSDLHVNAK.[G]	0.0639555	0.00486595	1	9	1	XP_016873759.1	XP_016873759.1 [5339-5358]		1	2140.12	0.856	0.62493	42.8	92.1	303.4	0.9		15.75	34.87	11.29
	FALSE	High	[K].MPDLHLK.[A]	0.00489966	0.000557966	1	9	19	XP_016873759.1	XP_016873759.1 [4052-4058]; [4516-4522]		0	853.46	0.599	0.91885	120.6	129.3	75.9	11.36	14.32	16.64	10.73	7.88
	FALSE	High	[K-].MPDMHFK.[A]	0.00175732	0.000154191	2	7	29	AAA69899.1; XP_016873759.1	AAA69899.1 [1665-1671]; XP_016873759.1 [1912-1918]; [2309-2315]; [2376-2382]		0	905.401	0.651	0.827318	104.9	120.8	91.2	11.69	24.3	13.33	16.29	4.66
	FALSE	High	[K].MPDMHVNMPK.[I]	5.36825e-05	1.93435e-05	1	3	2	XP_016873759.1	XP_016873759.1 [3216-3225]		0	1199.54	0.946	0.820851	93.9	118.2	82.4	17.63	3.6	2.37	9.91	2.51
	FALSE	High	[K].MPDMNIK.[A]	0.0566407	0.00441332	1	3	9	XP_016873759.1	XP_016873759.1 [3466-3472]		0	848.4	0.94	0.731913	140.5	72.8	61.9	16.14	14.04	4.17	14.87	11.09
	FALSE	High	[K].MPDVDISVPK.[I]	0.000151976	4.2772e-05	1	10	6	XP_016873759.1	XP_016873759.1 [5078-5087]		0	1100.57	0.741	0.975727	125.4	102.1	102.6	8.66	9.63	5.69	10.13	3.77
	FALSE	High	[K].MPDVHFK.[S]	0.00240102	0.000195525	1	9	26	XP_016873759.1	XP_016873759.1 [4442-4448]		0	873.429	0.721	0.962301	120.8	102.3	103.3	25.42	12.88	6.99	14.74	4.78
	FALSE	Medium	[K].MPEINIK.[A]	0.183813	0.0128059	1	10	1	XP_016873759.1	XP_016873759.1 [4772-4778]		0	844.46	0.828	0.998309	118.1	113.2	70.8	82.83	11.75	5.52	1.95	16.25
	FALSE	High	[K].MPEMHFK.[TA]	0.0290647	0.00232349	2	8	39	AAA69899.1; XP_016873759.1	AAA69899.1 [938-944]; [1066-1072]; [1396-1402]; [1598-1604]; XP_016873759.1 [1185-1191]; [1313-1319]; [1643-1649]; [1845-1851]; [2040-2046]; [2107-2113]; [2235-2241]; [2758-2764]		0	919.416	0.72	0.95925	98.7	123.3	98.8	11.19	21.47	11.64	22.39	15.72
	FALSE	High	[K].MPEMHFR.[A]	0.00229804	0.000195525	2	7	29	AAA69899.1; XP_016873759.1	AAA69899.1 [810-816]; XP_016873759.1 [1057-1063]		0	947.423	0.618	0.946607	129.2	95	123.2	29.63	13.9	5.28	21.44	5.88
	FALSE	High	[K].MPEMNIK.[AV]	0.0181162	0.00151032	2	13	34	AAA69899.1; XP_016873759.1	AAA69899.1 [561-567]; [689-695]; XP_016873759.1 [808-814]; [936-942]; [2502-2508]; [2630-2636]; [2886-2892]; [3014-3020]; [3142-3148]; [3594-3600]; [3796-3802]; [3924-3930]; [4180-4186]; [4308-4314]; [4382-4388]		0	862.416	0.71	0.944837	114.3	114.6	91.1	3.94	2.54	9.11	29.7	14.65
	FALSE	High	[K].MPEMSIKPQK.[I]	8.09723e-05	1.93435e-05	2	6	14	AAA69899.1; XP_016873759.1	AAA69899.1 [1194-1203]; XP_016873759.1 [1441-1450]		0	1188.61	2.059	0.0611002	175	47.2	46.1	31.37	22.35	6.67	1.25	8.31
	FALSE	High	[K].MPFLSISSPK.[V]	0.000273302	4.2772e-05	1	3	13	XP_016873759.1	XP_016873759.1 [3338-3347]		0	1106.59	0.545	0.934248	117.2	125.1	101.2	11.03	8.33	2.09	1.75	3.19
	FALSE	Medium	[K].MPKFSMPGFK.[GA]	0.31211	0.022219	2	14	2	AAA69899.1; XP_016873759.1	AAA69899.1 [635-644]; [1012-1021]; [1140-1149]; [1268-1277]; [1470-1479]; XP_016873759.1 [882-891]; [1259-1268]; [1387-1396]; [1515-1524]; [1717-1726]; [1986-1995]; [2181-2190]; [2448-2457]; [2576-2585]; [2832-2841]; [2960-2969]; [3540-3549]; [3742-3751]; [3998-4007]; [4126-4135]; [4254-4263]; [4590-4599]; [4718-4727]		1	1169.58	0.69	0.879528	91.6	97	132.2	9.92		10.55	79.77	17.9
	FALSE	High	[K].MPSLEISAPK.[V]	0.000129558	1.93435e-05	1	10	12	XP_016873759.1	XP_016873759.1 [4839-4848]		0	1072.57	0.653	0.896528	109.2	120.3	109.3	4.78	11.8	2.58	13.73	6.74
	FALSE	High	[K].MPSMNIQTHK.[I]	0.000292972	4.2772e-05	2	6	14	AAA69899.1; XP_016873759.1	AAA69899.1 [1322-1331]; XP_016873759.1 [1569-1578]		0	1186.57	0.565	0.929627	113.5	123.4	109.9	3.76	4.99	2.82	24.8	11.16
	FALSE	High	[K].MPTFSTPGAK.[G]	0.00221017	0.000195525	2	8	10	AAA69899.1; XP_016873759.1	AAA69899.1 [386-395]; XP_016873759.1 [633-642]		0	1036.51	0.86	0.996148	109.5	99	93.6	7.52	4.99	5.06	3.61	0.51
	FALSE	High	[K].MQVGGDGVK.[V]	0.00375266	0.000427246	1	9	11	XP_016873759.1	XP_016873759.1 [5271-5279]		0	890.44	0.862	0.982547	99.6	114.3	93.4	11.31	21.53	16.89	12.08	1.39
	FALSE	High	[K].MSLPDVDLDLK.[G]	1.17725e-05	1.93435e-05	2	7	10	AAA69899.1; XP_016873759.1	AAA69899.1 [820-830]; XP_016873759.1 [1067-1077]		0	1245.64	0.606	0.811193	127.4	155.6		9.83	3.74	4.11	3.71
	FALSE	High	[K].MSLPDVDLDLKGPK.[M]	0.000637433	6.84312e-05	2	6	1	AAA69899.1; XP_016873759.1	AAA69899.1 [820-833]; XP_016873759.1 [1067-1080]		1	1527.81	0.01	0.958477	98.7	67.4	295.2		56.12	12.39	12.91	12.16
	FALSE	High	[K].MYFPDVEFDIK.[S]	3.74014e-05	1.93435e-05	1	10	5	XP_016873759.1	XP_016873759.1 [5021-5031]		0	1403.66	0.168	0.849911	116.5	156.3	121.4	61.87	54.55	34.34	30.23	40.75
	FALSE	High	[K].MYFPDVEFDIK.[S]	7.85754e-05	1.93435e-05	1	10	3	XP_016873759.1	XP_016873759.1 [5021-5031]		0	1419.65	4.506	0.0342783	118.3	32.8	80.6	2.75	56.6	15.12	30.98	17.9
	FALSE	High	[K].QGFDLNVPGGEIDASLK.[A]	2.36486e-09	1.93435e-05	1	10	3	XP_016873759.1	XP_016873759.1 [4973-4989]		0	1759.89	1.17	0.950761	149.5	110.5	92.8	112.14	13.74	12.29	81.8
	FALSE	High	[K].SEDGVEGDLGETQSR.[T]	1.57329e-09	1.93435e-05	1	6	28	XP_016873759.1	XP_016873759.1 [135-149]		0	1578.69	0.709	0.961454	142.3	110.7	63.2	6.26	6.33	6.22	6.96	6.38
	FALSE	High	[K].SPQISMSDIDLNLK.[G]	2.78312e-08	1.93435e-05	1	9	3	XP_016873759.1	XP_016873759.1 [4449-4462]		0	1560.79	0.943	0.251357	146.6	78.7	99.7	4.29	4.02	3.6	7.43	2.9
	FALSE	High	[K].SSGCDVNLPGVNVK.[L]	6.13199e-08	1.93435e-05	1	9	6	XP_016873759.1	XP_016873759.1 [5432-5445]		0	1446.69	0.693	0.939125	99.1	96.1	156.4	6.19	9.61	8.17	10.02	1.34
	FALSE	High	[K].TDVDVSLPK.[V]	0.000507866	4.2772e-05	2	6	9	AAA69899.1; XP_016873759.1	AAA69899.1 [1348-1356]; XP_016873759.1 [1595-1603]		0	973.52	0.988	0.772522	132.3	83.6	98.4	2.69	14.71	4.19	5.71	4.24
	FALSE	High	[K].TPEMIIQKPK.[I]	1.89805e-05	1.93435e-05	2	8	30	AAA69899.1; XP_016873759.1	AAA69899.1 [243-252]; XP_016873759.1 [490-499]		0	1184.67	0.661	0.940609	112.3	119.8	85.2	17.61	15.31	2.53	10.98	15.69
	FALSE	High	[K].TPSFGISAPQVSIPDVNVNLK.[G]	3.10575e-14	1.93435e-05	1	10	14	XP_016873759.1	XP_016873759.1 [5117-5137]		0	2183.17	0.635	0.852236	100.4	124.3	103.2	3.73	0.84	5.19	0.93	2.51
	FALSE	High	[K].VDIDAPDVDVHGPDWHLK.[M]	4.29932e-15	1.93435e-05	2	13	9	AAA69899.1; XP_016873759.1	AAA69899.1 [484-501]; XP_016873759.1 [731-748]; [2158-2175]; [2681-2698]; [3975-3992]; [4231-4248]		0	2027.98	0.527	0.98585	108.9	126.6	105.6	3.84	4.44	3.16	7.84	1.66
	FALSE	High	[K].VDIDAPDVEVHDPDWHLK.[M]	8.26244e-10	1.93435e-05	2	6	13	AAA69899.1; XP_016873759.1	AAA69899.1 [1447-1464]; XP_016873759.1 [1694-1711]		0	2100	0.732	0.976374	118.7	109.3	103.9	42.34	17.19	1.77	1.88	6.74
	FALSE	High	[K].VDIDAPDVSIEGPDAK.[L]	5.21046e-09	1.93435e-05	1	9	9	XP_016873759.1	XP_016873759.1 [4285-4300]		0	1640.8	0.784	0.977638	112.4	107.1	95.6	3.75	3.82	2.4	7.46	5.99
	FALSE	High	[K].VDIDTPDIDIHGPEGK.[L]	4.74176e-11	1.93435e-05	1	8	17	XP_016873759.1	XP_016873759.1 [4029-4044]		0	1720.84	0.805	0.94758	123.4	98.5	98.6	2.71	4.24	3.66	10.52	9.77
	FALSE	High	[K].VDIDTPDINIEGSEGK.[F]	9.60867e-10	1.93435e-05	1	4	14	XP_016873759.1	XP_016873759.1 [3645-3660]		0	1701.82	0.767	0.988915	115.9	106.9	96.5	5.3	4.49	0.61	5.63	7.17
	FALSE	High	[K].VDIDVPDVDVQGPDWHLK.[M]	1.95954e-10	1.93435e-05	1	10	9	XP_016873759.1	XP_016873759.1 [4103-4120]; [4567-4584]		0	2047.01	0.659	0.946651	109.2	116.7	104.2	4.75	2.59	1.81	3.6	4.33
	FALSE	High	[K].VDIDVPDVNLEAPEGK.[L]	1.92404e-09	1.93435e-05	2	6	4	AAA69899.1; XP_016873759.1	AAA69899.1 [1299-1314]; XP_016873759.1 [1546-1561]		0	1709.86	0.713	0.930599	107.3	109.7	110.1	3.36	2.07	4	6.44	2.73
	FALSE	High	[K].VDIDVPDVNIEGPDAK.[L]	2.23042e-08	1.93435e-05	1	9	9	XP_016873759.1	XP_016873759.1 [4157-4172]		0	1695.84	0.737	0.995726	113.6	108.7	95.5	4.16	3.59	1.56	5.6	3.57
	FALSE	High	[K].VDIDVPDVNIEGPEGK.[L]	2.70533e-07	1.93435e-05	1	4	4	XP_016873759.1	XP_016873759.1 [2991-3006]; [3773-3788]		0	1695.84	0.746	0.99076	113.2	107.3	98.3	4.21	3.82	1.19	5.46	3.57
	FALSE	High	[K].VDIDVPDVNVQGPDWHLK.[M]	2.18487e-11	1.93435e-05	1	4	12	XP_016873759.1	XP_016873759.1 [2809-2826]		0	2046.03	0.759	0.830797	98.7	111.5	103.5	9.18	2.52	6.99	6.22	9.66
	FALSE	High	[K].VDIEAPDVSLEGPEGK.[L]	1.91439e-09	1.93435e-05	2	6	11	AAA69899.1; XP_016873759.1	AAA69899.1 [915-930]; XP_016873759.1 [1162-1177]		0	1654.82	0.656	0.954813	114.1	115.3	100.9	3.45	2.2	2.34	3.34	5.65
	FALSE	High	[K].VDIEGPDVNIEGPEGK.[L]	3.57083e-12	1.93435e-05	1	5	11	XP_016873759.1	XP_016873759.1 [2479-2494]; [2607-2622]		0	1667.81	0.679	0.973563	112	112.4	109.3	3.29	5.16	0.42	5.46	10.7
	FALSE	High	[R].VDIETPNLEGTLTGPR.[L]	1.63791e-09	1.93435e-05	2	8	13	AAA69899.1; XP_016873759.1	AAA69899.1 [294-309]; XP_016873759.1 [541-556]		0	1711.89	0.66	0.878986	109	119.9	97	4.62	2.21	4.6	4.81	6.14
	FALSE	High	[K].VDINAPDVDVQGPDWHLK.[M]	1.76305e-10	1.93435e-05	1	4	14	XP_016873759.1	XP_016873759.1 [3065-3082]; [3719-3736]		0	2018	0.654	0.865569	104.8	121.8	100.2	1.85	1.24	2.66	3.58	4.97
	FALSE	High	[K].VDINAPDVDVR.[G]	2.42612e-06	1.93435e-05	1	6	7	XP_016873759.1	XP_016873759.1 [3847-3857]		0	1212.62	0.589	6.09287e-17		154.6	146.9	15.84	6.14		4.63	1.4
	FALSE	High	[K].VDINAPDVEVHGPDWHLK.[M]	2.65011e-10	1.93435e-05	2	6	8	AAA69899.1; XP_016873759.1	AAA69899.1 [1245-1262]; XP_016873759.1 [1492-1509]		0	2041.01	0.47	0.638676	99.7	147.3	113.2	12.23	16.52	8.43	9.81	5.33
	FALSE	High	[K].VDINAPDVEVQGK.[V]	3.09329e-08	1.93435e-05	1	3	7	XP_016873759.1	XP_016873759.1 [3318-3330]		0	1383.71	0.776	6.09287e-17		130.7	116.6	14.73	1.55		4.14	1.71
	FALSE	High	[K].VDINAPDVGVQGPDWHLK.[M]	7.97246e-13	1.93435e-05	1	5	13	XP_016873759.1	XP_016873759.1 [2553-2570]		0	1959.99	0.767	0.987931	120.5	105.8	92	13.88	7.56	6.11	8.32	4.08
	FALSE	High	[K].VDINTPDVDVHGPDWHLK.[M]	2.55967e-07	1.93435e-05	1	10	8	XP_016873759.1	XP_016873759.1 [4695-4712]		0	2057.01	0.558	0.863232	108.8	120.7	109.1	11.67	9.07	4.24	8.79	6.77
	FALSE	High	[K].VDISAPDVDVHGPDWHLK.[M]	4.01633e-11	1.93435e-05	2	6	11	AAA69899.1; XP_016873759.1	AAA69899.1 [1117-1134]; XP_016873759.1 [1364-1381]		0	1999.99	0.573	0.876242	142.6	99	79.6	13.34	6.67	35.83	43.11	115.69
	FALSE	High	[K].VDTNAPDLSLEGPEGK.[L]	8.54285e-11	1.93435e-05	2	7	14	AAA69899.1; XP_016873759.1	AAA69899.1 [787-802]; XP_016873759.1 [1034-1049]		0	1641.8	0.815	0.974957	112.5	110.1	99.7	6.47	2.13	1.52	9.49	1.28
	FALSE	High	[KR].VDVDIPDVNIEGPDAK.[L]	8.39212e-07	1.93435e-05	1	9	1	XP_016873759.1	XP_016873759.1 [4749-4764]		0	1695.84
	FALSE	High	[KN].VDVDVPDVNIEGPDAK.[L]	7.80709e-08	1.93435e-05	1	10	8	XP_016873759.1	XP_016873759.1 [3119-3134]; [3571-3586]; [3901-3916]; [4621-4636]		0	1681.83	0.937	0.924766	114.2	94.1	100.7	1.12	3.15	4.34	3.69	7.14
	FALSE	High	[K].VDVECPDVNIEGPEGK.[W]	4.11314e-09	1.93435e-05	1	4	17	XP_016873759.1	XP_016873759.1 [2735-2750]		0	1757.79	0.567	0.833594	102.9	136.5	97.4	6.16	11.18	11.8	16.78	7.22
	FALSE	High	[K].VDVEGPDVNIEGPEGK.[L]	5.59072e-09	1.93435e-05	1	4	6	XP_016873759.1	XP_016873759.1 [2863-2878]		0	1653.8	0.01	6.09287e-17		11.1					35.15
	FALSE	High	[K].VDVEVPDVSLEGPEGK.[L]	1.48658e-07	1.93435e-05	2	7	7	AAA69899.1; XP_016873759.1	AAA69899.1 [1043-1058]; XP_016873759.1 [1290-1305]; [2017-2032]; [2212-2227]		0	1668.83	0.723	0.992443	111.3	115.2	97.4	4.25	1.93	2.78	5.83	3.14
	FALSE	High	[K].VDVNAPDVQAPDWHLK.[M]	2.06066e-10	1.93435e-05	1	4	14	XP_016873759.1	XP_016873759.1 [2427-2442]		0	1803.9	0.692	0.991531	116.6	110.7	100.4	0.83	2.47	0.92	6.61	4.3
	FALSE	High	[K].VDVSAPDVEAHGPEWNLK.[M]	3.53508e-12	1.93435e-05	2	8	14	AAA69899.1; XP_016873759.1	AAA69899.1 [363-380]; XP_016873759.1 [610-627]		0	1962.96	0.686	0.970408	112	113.4	99.4	5.43	7.44	13.94	12.18	1
	FALSE	High	[K].VDVSAPDVEMQGPDWNLK.[M]	4.33119e-11	1.93435e-05	2	7	13	AAA69899.1; XP_016873759.1	AAA69899.1 [733-750]; XP_016873759.1 [980-997]		0	1999.94	0.536	0.881713	107.9	123.9	109.5	17.91	13.85	9.39	10.02	17.66
	FALSE	High	[K].VEAPSLDVHMDSPDINIEGPDVK.[I]	1.991e-15	1.93435e-05	1	10	11	XP_016873759.1	XP_016873759.1 [4882-4904]		0	2477.19	0.01	0.654268	190.9	91.9	57.9		1.28	9.52	9.98	2.7
	FALSE	High	[K].VEGDLKGPEVDIK.[G]	0.00108339	0.000154191	1	10	1	XP_016873759.1	XP_016873759.1 [2537-2549]; [2665-2677]; [2793-2805]; [3629-3641]; [4087-4099]; [4215-4227]		1	1398.75	0.01	6.09287e-17		51.1	448.9				83.45	11.46
	FALSE	High	[K].VEGDMQVPDLDIK.[G]	3.41689e-05	1.93435e-05	1	6	2	XP_016873759.1	XP_016873759.1 [3831-3843]		0	1458.71	2.455	0.0452336	172.8	56.8		6.05	3.1	4.84	7.99
	FALSE	High	[K].VESDLKGPEVDIEGPEGK.[L]	2.71762e-10	1.93435e-05	1	9	3	XP_016873759.1	XP_016873759.1 [4417-4434]		1	1897.94	0.828	0.954634	96.7	100.4	94.9	21.31	36.25	45.03	42.85	4.66
	FALSE	High	[K].VESEIKVPDVELK.[S]	1.15802e-06	1.93435e-05	2	8	16	AAA69899.1; XP_016873759.1	AAA69899.1 [596-608]; XP_016873759.1 [843-855]		1	1484.82	0.271	0.440716	81.2	126.3	197.6	23.22	8.17	2.06	29.78	12.08
	FALSE	High	[K].VGGSGVNVNAK.[G]	2.20696e-05	1.93435e-05	2	8	15	AAA69899.1; XP_016873759.1	AAA69899.1 [6-16]; XP_016873759.1 [253-263]		0	1001.54	1.025	0.94698	98	103.6	89.8	33.52	22.08	18.01	4.68	55.42
	FALSE	High	[K].VGIDTPDIDIHGPEGK.[L]	2.58904e-09	1.93435e-05	1	9	14	XP_016873759.1	XP_016873759.1 [4493-4508]		0	1662.83	0.958	0.949451	100.4	108.5	103.7	14.79	5.16	14.16	13.62	30.36
	FALSE	High	[K].VGVEVPDVNIEGPEGK.[L]	2.24579e-07	1.93435e-05	2	7	3	AAA69899.1; XP_016873759.1	AAA69899.1 [666-681]; XP_016873759.1 [913-928]		0	1637.84	0.901	0.981197	117.4	107.9	78.1	14.56	6.58	22.1	1.66	38
	FALSE	High	[K].VHAPGLNLSGVGGK.[M]	0.00056902	4.2772e-05	1	9	6	XP_016873759.1	XP_016873759.1 [5257-5270]		0	1305.73	0.921	6.09287e-17	384.9	25.3	17.1	6.25	2.24	12.24	12.14	8.54
	FALSE	High	[K].VKGDADVSVPK.[L]	0.000352008	4.2772e-05	2	6	8	AAA69899.1; XP_016873759.1	AAA69899.1 [1622-1632]; XP_016873759.1 [1869-1879]		1	1114.61	0.719	0.989056	109.3	115.5	103.7	5.81	5.69	7.92	35.05	5.72
	FALSE	High	[K].VKGDFDVSVPK.[V]	0.00974024	0.000819544	1	10	8	XP_016873759.1	XP_016873759.1 [4796-4806]		1	1190.64	0.421	0.613597	68.8	126.6	192.1	39.28	4.74	20.09	24.07	7.74
	FALSE	High	[K].VKGDLDIAGPNLEGDFK.[G]	6.51364e-08	1.93435e-05	1	3	2	XP_016873759.1	XP_016873759.1 [3362-3378]		1	1787.92	0.01	7.51975e-08	27.3	213.2	259.4			40.29	10.58	6.8
	FALSE	High	[K].VKGDMDVSLPK.[V]	2.10936e-05	1.93435e-05	1	4	8	XP_016873759.1	XP_016873759.1 [3038-3048]; [3820-3830]		1	1188.63	0.609	0.791092	72.3	116.4	175.3	26.26	30.43	10.02	35.93	8.87
	FALSE	High	[K].VKGDMDVSVPK.[V]	5.67277e-05	1.93435e-05	2	7	20	AAA69899.1; XP_016873759.1	AAA69899.1 [1420-1430]; XP_016873759.1 [1667-1677]; [2131-2141]		1	1174.61	0.69	0.0858618	59.6	139.3	157	25.49	22.91	2.31	17.17	16.97
	FALSE	High	[K].VKGDVDISLPK.[VL]	0.00030788	4.2772e-05	1	4	10	XP_016873759.1	XP_016873759.1 [2910-2920]; [3490-3500]		1	1170.67	0.491	0.573864	91.2	129.4	138.1	6.04	12.74	3.65	19.25	8.77
	FALSE	High	[K].VKGDVDVSLPK.[VML]	2.62949e-06	1.93435e-05	1	10	33	XP_016873759.1	XP_016873759.1 [2064-2074]; [2526-2536]; [2654-2664]; [3692-3702]; [3948-3958]; [4204-4214]; [4332-4342]; [4406-4416]		1	1156.66	0.816	0.823548	117.8	85.3	122.3	18.16	8.63	19.89	3.99	10.11
	FALSE	High	[K].VKGDVDVSVPK.[VL]	0.000591952	4.2772e-05	2	7	1	AAA69899.1; XP_016873759.1	AAA69899.1 [962-972]; XP_016873759.1 [1209-1219]; [1936-1946]		1	1142.64	100				480.8
	FALSE	High	[K].VKGDVDVTLPK.[V]	0.00155538	0.000154191	1	10	14	XP_016873759.1	XP_016873759.1 [4668-4678]		1	1170.67	0.602	0.831266	97.6	125.1	125.6	13.39	3.96	4.07	17.17	3.05
	FALSE	Medium	[K].VKGEYDMTVPK.[L]	0.18746	0.012966	2	7	2	AAA69899.1; XP_016873759.1	AAA69899.1 [713-723]; XP_016873759.1 [960-970]		1	1266.64	0.034	0.228378	97.2	191.6	198.7	154.35	151.93	7.36	5.13	4.87
	FALSE	High	[K].VKGEYDVTVPK.[L]	0.00717955	0.000722819	2	8	9	AAA69899.1; XP_016873759.1	AAA69899.1 [464-474]; XP_016873759.1 [711-721]		1	1234.67	0.557	1	112.3	105.1	98.5	21.24	9.92	0.42	22.67	6.67
	FALSE	Medium	[K].VKGGVDVTLPR.[V]	0.477045	0.0395161	2	8	3	AAA69899.1; XP_016873759.1	AAA69899.1 [336-346]; XP_016873759.1 [583-593]		1	1140.67	0.01	6.09287e-17		69.1	430.9					16.6
	FALSE	High	[K].VKMPDVDISVPK.[I]	0.00268533	0.000282962	1	10	1	XP_016873759.1	XP_016873759.1 [5076-5087]		1	1327.73	0.01	6.09287e-17		92.3	407.7				33.52	15.14
	FALSE	High	[K].VKVPEVDVR.[G]	0.000287213	4.2772e-05	2	8	24	AAA69899.1; XP_016873759.1	AAA69899.1 [351-359]; XP_016873759.1 [598-606]		1	1040.61	0.626	0.746817	85.7	125.8	128.8	9.7	7.19	16.32	11.48	15.24
	FALSE	High	[K].VNVEAPDVNLEGLGGK.[L]	6.42467e-10	1.93435e-05	2	8	14	AAA69899.1; XP_016873759.1	AAA69899.1 [417-432]; XP_016873759.1 [664-679]		0	1610.84	0.716	0.9903	112.6	110.3	96.8	7.33	1.13	2.98	4.23	0.54
	FALSE	High	[K].VPDVDIK.[GE]	0.0234119	0.00181324	3	12	21	AAA69899.1; XP_016873759.1; AAH40361.1	AAA69899.1 [1107-1113]; [1437-1443]; XP_016873759.1 [1354-1360]; [1684-1690]; [1953-1959]; [3055-3061]; AAH40361.1 [475-481]		0	785.44	0.446	0.318566	80.5	149.1	125.8	11.76	7.88	2.86	42.94	53.02
	FALSE	High	[QK].VPDVDIR.[G]	0.0419887	0.00340387	1	5	13	XP_016873759.1	XP_016873759.1 [1098-1104]; [2148-2154]		0	813.446	0.708	0.788106	87.2	123.8	91.5	2.84	11.76	7.56	9.78	6.34
	FALSE	High	[K].VPDVEIK.[SG]	0.0385317	0.00318544	2	6	42	AAA69899.1; XP_016873759.1	AAA69899.1 [602-608]; [979-985]; XP_016873759.1 [849-855]; [1226-1232]		0	799.456	1.007	0.996889	110.7	101.7	70.7	5	1.69	5.55	8.17	3.84
	FALSE	High	[K].VPEVDVR.[G]	0.0738903	0.00543736	2	8	2	AAA69899.1; XP_016873759.1	AAA69899.1 [353-359]; XP_016873759.1 [600-606]		0	813.446	100	6.09287e-17	210.9			15.15	15.04	5.47
	FALSE	High	[K].VPGIDATTK.[L]	0.00489966	0.000557966	1	9	6	XP_016873759.1	XP_016873759.1 [5280-5288]		0	901.499	0.985	0.746668	112.4	93.9	120	7.08	3.06	7.33	10.34	5.75
	FALSE	High	[K].VQANLGAPDINIEGLDAK.[V]	3.35711e-10	1.93435e-05	1	10	4	XP_016873759.1	XP_016873759.1 [5097-5114]		0	1837.97	0.01	6.09287e-17	123.5	113.2	144.5			4.08		2.17
	FALSE	High	[K].VQTPEVDVK.[G]	0.00148849	0.000154191	1	3	22	XP_016873759.1	XP_016873759.1 [3297-3305]		0	1014.55	0.725	0.973159	113.2	106.4	99.8	4.05	1.1	3.86	8.39	5.86
	FALSE	High	[R].VSAPEVSVGHK.[G]	7.75503e-06	1.93435e-05	2	8	34	AAA69899.1; XP_016873759.1	AAA69899.1 [84-94]; XP_016873759.1 [331-341]		0	1109.59	0.954	0.98407	102.7	92.6	112.8	6.21	4.73	4.37	29.77	5.16
	FALSE	High	[K].VSAPGVQGDVK.[G]	5.905e-05	1.93435e-05	2	8	25	AAA69899.1; XP_016873759.1	AAA69899.1 [273-283]; XP_016873759.1 [520-530]		0	1056.57	0.943	1	110.5	94.4	105	8.43	6.19	6.75	5.47	3.39
	FALSE	High	[K].VSGPDLDLNLK.[G]	4.71169e-05	1.93435e-05	1	9	2	XP_016873759.1	XP_016873759.1 [5230-5240]		0	1170.64	0.682	0.943748	108	112.9	107.5	6.57	4.2	2.98	4.1	8.75
	FALSE	High	[K].VSMPDVDLNLK.[G]	5.905e-05	1.93435e-05	2	6	11	AAA69899.1; XP_016873759.1	AAA69899.1 [1534-1544]; XP_016873759.1 [1781-1791]		0	1230.64	0.55	0.586318	86.5	143.8	99.7	16.78	18.19	33.31	6.06	2.87
	FALSE	High	[K].VSMPDVELNLK.[S]	0.000136187	1.93435e-05	1	3	4	XP_016873759.1	XP_016873759.1 [3348-3358]		0	1244.66	0.677	0.995625	120.4	108	95.4	4.78	3.2	1.95	8.19	1.75
	FALSE	High	[K].VSVGAPDLSLEASEGSIK.[L]	6.1712e-10	1.93435e-05	1	9	16	XP_016873759.1	XP_016873759.1 [5318-5335]		0	1758.91	0.674	0.95942	111.5	118.2	89.6	4.08	5.38	5.64	3.3	3.33
	FALSE	High	[K].VSVGAPDLSLEASEGSIKLPK.[M]	3.50792e-08	1.93435e-05	1	9	1	XP_016873759.1	XP_016873759.1 [5318-5338]		1	2097.14	0.01	6.09287e-17		74.7	425.3				61.35	11.74
	FALSE	High	[K].VTAPDVDLHLK.[A]	1.43231e-05	1.93435e-05	1	10	14	XP_016873759.1	XP_016873759.1 [4849-4859]		0	1207.67	0.72	0.996148	103.6	102.5	121.9	6.8	8.6	8.83	16.54	2.61
FALSE	High	Master Protein	CAA91196.1	0	2408.38	62	294	5410	7	4684	531.4	5.95	80445	294	PLEC	0.783	0.746	0.743	1.09	0.638565	0.537764	0.611556	0.966597
	Checked	Confidence	Annotated Sequence	Qvality PEP	Qvality q-value	# Protein Groups	# Proteins	# PSMs	Master Protein Accessions	Positions in Master Proteins	Modifications in Master Proteins	# Missed Cleavages	Theo. MH+ [Da]	Abundance Ratio: (5000uM 24h) / (50uM 24h)	Abundance Ratio Adj. P-Value: (5000uM 6Days) / (50uM 24h)	Abundances (Grouped): 5000uM 6Days	Abundances (Grouped): 50uM 24h	Abundances (Grouped): 50uM 48h	Abundances (Grouped) CV [%]: 5000uM 24h	Abundances (Grouped) CV [%]: 5000uM 48h	Abundances (Grouped) CV [%]: 5000uM 6Days	Abundances (Grouped) CV [%]: 50uM 24h	Abundances (Grouped) CV [%]: 50uM 48h
	FALSE	High	[R].AAEEAEEAR.[V]	0.000480964	4.2772e-05	4	26	72	CAA91196.1; XP_005251037.1; EAW82172.1; XP_011515432.1	CAA91196.1 [2226-2234]; XP_005251037.1 [2094-2102]; EAW82172.1 [2116-2124]; XP_011515432.1 [2094-2102]		0	975.438	0.894	0.828213	126.5	84.7	134.8	33.95	47.89	14.63	14.82	19.32
	FALSE	High	[R].AALAHSEEVTASQVAATK.[T]	1.96117e-15	1.93435e-05	3	25	27	CAA91196.1; XP_005251037.1; XP_011515432.1	CAA91196.1 [2744-2761]; XP_005251037.1 [2612-2629]; XP_011515432.1 [2612-2629]		0	1783.92	1.073	0.587235	144.6	81.3	79.5	7.65	7.75	19.6	5.44	5.68
	FALSE	High	[K].AALEEVER.[L]	0.00561564	0.000596903	4	26	9	CAA91196.1; XP_005251037.1; EAW82172.1; XP_011515432.1	CAA91196.1 [2143-2150]; XP_005251037.1 [2011-2018]; EAW82172.1 [2033-2040]; XP_011515432.1 [2011-2018]		0	916.473	1.046	0.849901	133.3	92.9	82.7	9.35	4.31	5.74	1.22	4.32
	FALSE	Medium	[K].ADSMIR.[L]	0.396533	0.0308312	4	26	19	CAA91196.1; XP_005251037.1; EAW82172.1; XP_011515432.1	CAA91196.1 [582-587]; XP_005251037.1 [450-455]; EAW82172.1 [472-477]; XP_011515432.1 [450-455]		0	692.34	0.775	0.964939	96.8	107	92.3	42.19	24.87	25.42	22.94	7.59
	FALSE	High	[K].AEAELLQQQK.[E]	4.61805e-05	1.93435e-05	4	25	13	CAA91196.1; XP_005251037.1; EAW82172.1; XP_011515432.1	CAA91196.1 [2464-2473]; XP_005251037.1 [2332-2341]; EAW82172.1 [2354-2363]; XP_011515432.1 [2332-2341]		0	1157.62	1.331	0.945058	108.1	83.5	77.6	33.76	8.96	5.56	27.82	3.97
	FALSE	High	[K].AELELELGR.[I]	0.00193751	0.000154191	4	26	21	CAA91196.1; XP_005251037.1; EAW82172.1; XP_011515432.1	CAA91196.1 [2079-2087]; XP_005251037.1 [1947-1955]; EAW82172.1 [1969-1977]; XP_011515432.1 [1947-1955]		0	1029.56	0.627	0.979691	127.7	110.3	110.7	6.41	11.79	3.89	20.29	1.24
	FALSE	High	[R].AEMEVLLASK.[A]	0.000439957	4.2772e-05	4	26	6	CAA91196.1; XP_005251037.1; EAW82172.1; XP_011515432.1	CAA91196.1 [1899-1908]; XP_005251037.1 [1767-1776]; EAW82172.1 [1789-1798]; XP_011515432.1 [1767-1776]		0	1090.58	0.579	0.912412	142.4	107.2	83.6	15.63	2.38	10.27	19.12	1.82
	FALSE	High	[K].AFCGFEDPR.[T]	0.00754448	0.000738505	3	26	9	CAA91196.1; XP_005251037.1; XP_011515432.1	CAA91196.1 [4492-4500]; XP_005251037.1 [4360-4368]; XP_011515432.1 [4360-4368]		0	1099.45	0.852	0.945557	99.5	110.2	113.5	19.37	14.34	3.82	0.97	7.46
	FALSE	High	[R].AGLVGPEFHEK.[L]	4.76081e-06	1.93435e-05	3	25	31	CAA91196.1; XP_005251037.1; XP_011515432.1	CAA91196.1 [3221-3231]; XP_005251037.1 [3089-3099]; XP_011515432.1 [3089-3099]		0	1183.61	1.048	0.902229	110.4	90.5	95.9	16.12	5.48	31.84	10.55	25.64
	FALSE	High	[R].AGTLSITEFADMLSGNAGGFR.[S]	6.80849e-14	1.93435e-05	3	26	6	CAA91196.1; XP_005251037.1; XP_011515432.1	CAA91196.1 [4361-4381]; XP_005251037.1 [4229-4249]; XP_011515432.1 [4229-4249]		0	2115.02	0.468	0.719368	78	125.4	158.8	6.13	54.73	49.97	52.58	17.42
	FALSE	High	[R].AGTLSITEFADMLSGNAGGFR.[S]	2.07383e-12	1.93435e-05	3	26	9	CAA91196.1; XP_005251037.1; XP_011515432.1	CAA91196.1 [4361-4381]; XP_005251037.1 [4229-4249]; XP_011515432.1 [4229-4249]		0	2131.01	8.319	0.0315582	95.1	16.6	148.8	3.78	31.88	42.14	107.32	50.99
	FALSE	High	[K].AGVAAPATQVAQVTLQSVQR.[R]	2.41294e-09	1.93435e-05	3	24	15	CAA91196.1; XP_005251037.1; XP_011515432.1	CAA91196.1 [631-650]; XP_005251037.1 [499-518]; XP_011515432.1 [499-518]		0	1995.1	0.534	0.960562	121.6	110.5	130.2	13.74	17.34	23.99	26.77	28.13
	FALSE	High	[K].AGVVGPELHEQLLSAEK.[A]	2.39519e-13	1.93435e-05	3	25	23	CAA91196.1; XP_005251037.1; XP_011515432.1	CAA91196.1 [3552-3568]; XP_005251037.1 [3420-3436]; XP_011515432.1 [3420-3436]		0	1776.95	1.296	0.860423	120.7	76.2	95.9	13.48	9.24	21.7	35.72	18.71
	FALSE	High	[K].AHAFAVQQK.[E]	0.000453225	4.2772e-05	4	26	8	CAA91196.1; XP_005251037.1; EAW82172.1; XP_011515432.1	CAA91196.1 [2190-2198]; XP_005251037.1 [2058-2066]; EAW82172.1 [2080-2088]; XP_011515432.1 [2058-2066]		0	999.537	0.886	0.931953	94.3	105.1	123	8.63	23.02	9.48	14.16	10.35
	FALSE	High	[K].AKLEQLFQDEVAK.[A]	4.04405e-10	1.93435e-05	3	25	14	CAA91196.1; XP_005251037.1; XP_011515432.1	CAA91196.1 [2651-2663]; XP_005251037.1 [2519-2531]; XP_011515432.1 [2519-2531]		1	1518.82	0.542	0.996148	108.4	100.3	148.7	22.71	9.17	7.39	13.3	9.62
	FALSE	High	[R].ALAEEAK.[R]	0.114749	0.00835447	4	26	9	CAA91196.1; XP_005251037.1; EAW82172.1; XP_011515432.1	CAA91196.1 [1945-1951]; XP_005251037.1 [1813-1819]; EAW82172.1 [1835-1841]; XP_011515432.1 [1813-1819]		0	731.393	0.724	0.905657	113.5	123.6	62.3	18.28	12.56	11.71	44.5	8.57
	FALSE	High	[R].ALQALEELR.[L]	0.00140375	0.000154191	4	25	23	CAA91196.1; XP_005251037.1; EAW82172.1; XP_011515432.1	CAA91196.1 [1671-1679]; XP_005251037.1 [1539-1547]; EAW82172.1 [1561-1569]; XP_011515432.1 [1539-1547]		0	1042.59	0.854	0.978468	115.8	107.1	99.3	20.55	16.83	5.5	11.64	9.7
	FALSE	High	[R].AIYEVLFR.[E]	0.0061931	0.00069399	1	4	10	CAA91196.1	CAA91196.1 [14-21]		0	1010.57	0.735	0.513931	74.7	122	131.1	5.43	3.88	2.99	6.99	4.33
	FALSE	High	[R].ANELQLR.[W]	0.0450411	0.0036071	3	25	19	CAA91196.1; XP_005251037.1; EAW82172.1	CAA91196.1 [411-417]; XP_005251037.1 [279-285]; EAW82172.1 [301-307]		0	843.468	0.833	0.954762	134.2	103.3	96.5	2.13	5.86	3.24	9.79	3.8
	FALSE	High	[R].AQAEAQQPTFDALR.[D]	5.00489e-09	1.93435e-05	4	26	22	CAA91196.1; XP_005251037.1; EAW82172.1; XP_011515432.1	CAA91196.1 [1274-1287]; XP_005251037.1 [1142-1155]; EAW82172.1 [1164-1177]; XP_011515432.1 [1142-1155]		0	1545.77	1.375	0.981655	106.8	102.7	57.4	13.16	5.86	10.09	19.5	5.05
	FALSE	High	[R].AQAEAQQPTFDALRDELR.[G]	6.24671e-06	1.93435e-05	4	26	11	CAA91196.1; XP_005251037.1; EAW82172.1; XP_011515432.1	CAA91196.1 [1274-1291]; XP_005251037.1 [1142-1159]; EAW82172.1 [1164-1181]; XP_011515432.1 [1142-1159]		1	2059.02	0.244	0.250945	68.8	129.1	230.9	7.07	18.54	5.91	35.28	1.69
	FALSE	High	[R].AQAEQAALR.[Q]	0.00368065	0.000427246	4	26	12	CAA91196.1; XP_005251037.1; EAW82172.1; XP_011515432.1	CAA91196.1 [2287-2295]; XP_005251037.1 [2155-2163]; EAW82172.1 [2177-2185]; XP_011515432.1 [2155-2163]		0	957.511	100	6.09287e-17	214.4			12.06	6.01	16.94
	FALSE	High	[K].AQAEVEGLGK.[G]	0.000703458	9.10162e-05	4	26	30	CAA91196.1; XP_005251037.1; EAW82172.1; XP_011515432.1	CAA91196.1 [1166-1175]; XP_005251037.1 [1034-1043]; EAW82172.1 [1056-1065]; XP_011515432.1 [1034-1043]		0	1001.53	0.98	0.978144	116.4	97.9	102.8	4.64	4.35	9.07	4.7	3.18
	FALSE	Medium	[R].AQFEQLK.[D]	0.172327	0.0120386	3	25	16	CAA91196.1; XP_005251037.1; XP_011515432.1	CAA91196.1 [3463-3469]; XP_005251037.1 [3331-3337]; XP_011515432.1 [3331-3337]		0	863.462	0.911	0.95256	111.3	96.6	107.8	11.98	8.37	7.84	3.69	5.73
	FALSE	High	[R].AQFEQLKDGK.[T]	0.139689	0.00997024	3	25	1	CAA91196.1; XP_005251037.1; XP_011515432.1	CAA91196.1 [3463-3472]; XP_005251037.1 [3331-3340]; XP_011515432.1 [3331-3340]		1	1163.61
	FALSE	High	[K].AQLEPVASPAK.[K]	9.55152e-05	1.93435e-05	4	26	31	CAA91196.1; XP_005251037.1; EAW82172.1; XP_011515432.1	CAA91196.1 [1428-1438]; XP_005251037.1 [1296-1306]; EAW82172.1 [1318-1328]; XP_011515432.1 [1296-1306]		0	1110.62	1.062	0.676377	139.9	87.8	102.9	13.91	1.02	3.45	10.07	6.03
	FALSE	High	[R].AQLMADFQAGR.[V]	6.11595e-05	1.93435e-05	3	26	14	CAA91196.1; XP_005251037.1; XP_011515432.1	CAA91196.1 [3739-3749]; XP_005251037.1 [3607-3617]; XP_011515432.1 [3607-3617]		0	1207.59	0.553	0.925519	125.6	119.5	99.8	20.39	31.06	25.31	12.83	12.98
	FALSE	High	[R].AQLMADFQAGR.[V]	0.0001155	1.93435e-05	3	26	18	CAA91196.1; XP_005251037.1; XP_011515432.1	CAA91196.1 [3739-3749]; XP_005251037.1 [3607-3617]; XP_011515432.1 [3607-3617]		0	1223.58	1.158	0.472006	146	78.6	97.5	22.18	61.32	36.63	49.09	70.57
	FALSE	High	[K].AQVEQELTTLR.[L]	2.56608e-05	1.93435e-05	4	26	18	CAA91196.1; XP_005251037.1; EAW82172.1; XP_011515432.1	CAA91196.1 [2319-2329]; XP_005251037.1 [2187-2197]; EAW82172.1 [2209-2219]; XP_011515432.1 [2187-2197]		0	1287.69	0.809	0.967572	124.3	105.4	92.5	2.87	5.22	5.42	33.85	3.8
	FALSE	High	[K].ASDSELER.[Q]	0.0164146	0.00142738	4	26	38	CAA91196.1; XP_005251037.1; EAW82172.1; XP_011515432.1	CAA91196.1 [2038-2045]; XP_005251037.1 [1906-1913]; EAW82172.1 [1928-1935]; XP_011515432.1 [1906-1913]		0	906.416	0.829	0.333822	72.5	130.8	78.4	13.42	24.58	7.86	14.2	20.82
	FALSE	High	[K].ATVSAPFGK.[F]	0.0107783	0.000970585	3	25	34	CAA91196.1; XP_005251037.1; XP_011515432.1	CAA91196.1 [3045-3053]; XP_005251037.1 [2913-2921]; XP_011515432.1 [2913-2921]		0	877.478	0.79	0.891157	103.8	110.8	120.5	2.65	6.26	4.58	4.82	7.79
	FALSE	High	[R].AVTGYKDPYSGK.[L]	3.99242e-05	1.93435e-05	3	26	8	CAA91196.1; XP_005251037.1; XP_011515432.1	CAA91196.1 [4147-4158]; XP_005251037.1 [4015-4026]; XP_011515432.1 [4015-4026]		1	1285.64	2.693	0.988236	79.2	42.4	167.4	0.7		15.48	74	6.25
	FALSE	High	[R].AVTGYKDPYTGQQISLFQAMQK.[G]	3.50276e-06	1.93435e-05	3	25	1	CAA91196.1; XP_005251037.1; XP_011515432.1	CAA91196.1 [2910-2931]; XP_005251037.1 [2778-2799]; XP_011515432.1 [2778-2799]		1	2474.24
	FALSE	High	[K].AVVQLKPR.[H]	0.0010887	0.000154191	4	26	36	CAA91196.1; XP_005251037.1; EAW82172.1; XP_011515432.1	CAA91196.1 [927-934]; XP_005251037.1 [795-802]; EAW82172.1 [817-824]; XP_011515432.1 [795-802]		0	910.583	0.822	0.868553	96.4	128.1	117.1	12.83	3.61	6.85	31.89	20.56
	FALSE	High	[K].AYSDPSTGEPATYGELQQR.[C]	1.02918e-15	1.93435e-05	3	25	17	CAA91196.1; XP_005251037.1; XP_011515432.1	CAA91196.1 [3317-3335]; XP_005251037.1 [3185-3203]; XP_011515432.1 [3185-3203]		0	2069.94	0.944	0.888895	129.9	87.4	85.2	15.67	7.31	6.51	12.68	13.86
	FALSE	High	[R].CDNFTSSWR.[D]	0.000772392	9.10162e-05	4	26	24	CAA91196.1; XP_005251037.1; EAW82172.1; XP_011515432.1	CAA91196.1 [317-325]; XP_005251037.1 [185-193]; EAW82172.1 [207-215]; XP_011515432.1 [189-197]		0	1173.46	0.882	0.987247	104.3	105.1	109.6	6.67	3	5.78	9.37	6.1
	FALSE	High	[R].CITDPQTGLCLLPLK.[E]	1.48036e-12	1.93435e-05	3	26	6	CAA91196.1; XP_005251037.1; XP_011515432.1	CAA91196.1 [4245-4259]; XP_005251037.1 [4113-4127]; XP_011515432.1 [4113-4127]		0	1730.87	0.858	1	114.2	108.9	95.8	4.96	6.19	7.75	8.93	9.16
	FALSE	High	[R].CRPDQLTGLSLLPLSEK.[A]	1.54686e-10	1.93435e-05	3	25	2	CAA91196.1; XP_005251037.1; XP_011515432.1	CAA91196.1 [3336-3352]; XP_005251037.1 [3204-3220]; XP_011515432.1 [3204-3220]		0	1928.02	0.01	6.09287e-17		241.7	258.3				22.11	10.14
	FALSE	High	[R].CVEDPETGLCLLPLTDK.[A]	1.75891e-14	1.93435e-05	3	25	15	CAA91196.1; XP_005251037.1; XP_011515432.1	CAA91196.1 [3008-3024]; XP_005251037.1 [2876-2892]; XP_011515432.1 [2876-2892]		0	1961.91	1.156	0.870667	135.6	83.5	50.4	11.79	4.51	1.62	7.38	5.58
	FALSE	High	[R].CVEDPETGLR.[L]	1.17725e-05	1.93435e-05	3	26	47	CAA91196.1; XP_005251037.1; XP_011515432.1	CAA91196.1 [3667-3676]; XP_005251037.1 [3535-3544]; XP_011515432.1 [3535-3544]		0	1176.52	0.953	0.97981	113.3	96	88.9	15.38	8.42	3.06	6.62	4.33
	FALSE	High	[R].DALDGPAAEAEPEHSFDGLR.[R]	7.4915e-14	1.93435e-05	3	25	21	CAA91196.1; XP_005251037.1; XP_011515432.1	CAA91196.1 [2768-2787]; XP_005251037.1 [2636-2655]; XP_011515432.1 [2636-2655]		0	2096.95	0.904	0.875768	118	99.1	101.9	7.22	2.27	2.68	6.01	5.2
	FALSE	High	[R].DGHNLISLLEVLSGDSLPR.[E]	2.25902e-12	1.93435e-05	4	26	10	CAA91196.1; XP_005251037.1; EAW82172.1; XP_011515432.1	CAA91196.1 [209-227]; XP_005251037.1 [77-95]; EAW82172.1 [99-117]; XP_011515432.1 [81-99]		0	2035.08	1.12	0.983301	115.8	91.8	62.2	25.84	21.78	9.78	7.26	32.31
	FALSE	High	[R].DLDKADSMIR.[L]	0.114131	0.00832698	4	26	5	CAA91196.1; XP_005251037.1; EAW82172.1; XP_011515432.1	CAA91196.1 [578-587]; XP_005251037.1 [446-455]; EAW82172.1 [468-477]; XP_011515432.1 [446-455]		1	1163.57	0.01	0.913506	67.6	94.2	338.2			14.67	67.91	6.41
	FALSE	High	[K].DLLPSDMAVALLEAQAGTGHIIDPATSAR.[L]	2.82718e-16	1.93435e-05	3	25	13	CAA91196.1; XP_005251037.1; XP_011515432.1	CAA91196.1 [3184-3212]; XP_005251037.1 [3052-3080]; XP_011515432.1 [3052-3080]		0	2933.5	0.293	0.919353	137.4	155.5	83.8	39.67	13.97	65	45.58	20
	FALSE	High	[K].DLLPSDMAVALLEAQAGTGHIIDPATSAR.[L]	6.16892e-16	1.93435e-05	3	25	15	CAA91196.1; XP_005251037.1; XP_011515432.1	CAA91196.1 [3184-3212]; XP_005251037.1 [3052-3080]; XP_011515432.1 [3052-3080]		0	2949.5	2.899	0.119129	159.1	40.5	53.9	18.46	29.49	35.7	64.74	47.75
	FALSE	High	[K].DLSELGSVR.[T]	0.00213603	0.000195525	3	25	13	CAA91196.1; XP_005251037.1; XP_011515432.1	CAA91196.1 [3477-3485]; XP_005251037.1 [3345-3353]; XP_011515432.1 [3345-3353]		0	975.511	0.873	0.799593	126.7	87.1	94.2	16.62	2.98	4.18	9.41	12.7
	FALSE	High	[R].DPYTGQSVSLFQALK.[K]	2.21215e-07	1.93435e-05	3	25	1	CAA91196.1; XP_005251037.1; XP_011515432.1	CAA91196.1 [3244-3258]; XP_005251037.1 [3112-3126]; XP_011515432.1 [3112-3126]		0	1653.85	100	6.09287e-17	200.7			33.97	11.9	4.32
	FALSE	High	[R].DSQDAGGFGPEDR.[L]	1.29123e-07	1.93435e-05	4	26	32	CAA91196.1; XP_005251037.1; EAW82172.1; XP_011515432.1	CAA91196.1 [1076-1088]; XP_005251037.1 [944-956]; EAW82172.1 [966-978]; XP_011515432.1 [944-956]		0	1350.56	0.996	0.966756	104.4	101.8	118.9	14.96	7.32	11.9	10.7	7.26
	FALSE	High	[K].DTHDQLSEPSEVR.[S]	1.87624e-09	1.93435e-05	3	26	63	CAA91196.1; XP_005251037.1; XP_011515432.1	CAA91196.1 [3969-3981]; XP_005251037.1 [3837-3849]; XP_011515432.1 [3837-3849]		0	1512.69	0.839	0.9434	123.6	103.3	94.6	11.16	4.71	3.41	15.58	1.28
	FALSE	High	[R].DVAEVDTVR.[R]	0.00124234	0.000154191	3	25	15	CAA91196.1; XP_005251037.1; XP_011515432.1	CAA91196.1 [3146-3154]; XP_005251037.1 [3014-3022]; XP_011515432.1 [3014-3022]		0	1003.51	0.867	0.993757	98.3	91.7	121	25.06	12.19	6.73	19.7	14.26
	FALSE	High	[R].EAEGQLQK.[L]	0.0126882	0.00111106	4	26	40	CAA91196.1; XP_005251037.1; EAW82172.1; XP_011515432.1	CAA91196.1 [870-877]; XP_005251037.1 [738-745]; EAW82172.1 [760-767]; XP_011515432.1 [738-745]		0	902.458	0.767	0.970725	92.5	100.1	96	4.06	13.39	8.2	15.09	13.51
	FALSE	High	[R].EAIAELER.[E]	0.00833516	0.000772347	4	25	24	CAA91196.1; XP_005251037.1; EAW82172.1; XP_011515432.1	CAA91196.1 [2587-2594]; XP_005251037.1 [2455-2462]; EAW82172.1 [2477-2484]; XP_011515432.1 [2455-2462]		0	930.489	1.039	0.89476	119.2	88.1	92.2	9.92	3.01	0.35	8.06	32.96
	FALSE	High	[K].EAQAVPATLPELEATK.[A]	5.25602e-07	1.93435e-05	4	26	14	CAA91196.1; XP_005251037.1; EAW82172.1; XP_011515432.1	CAA91196.1 [1251-1266]; XP_005251037.1 [1119-1134]; EAW82172.1 [1141-1156]; XP_011515432.1 [1119-1134]		0	1667.89	0.612	0.98585	128.4	119.4	92.5	3.72	2.69	4.43	0.4	3.63
	FALSE	High	[R].EEAAVDAQQQK.[R]	2.15219e-05	1.93435e-05	4	25	26	CAA91196.1; XP_005251037.1; EAW82172.1; XP_011515432.1	CAA91196.1 [1542-1552]; XP_005251037.1 [1410-1420]; EAW82172.1 [1432-1442]; XP_011515432.1 [1410-1420]		0	1216.58	1.207	0.928702	111.4	84.4	77.6	18.47	16.41	2.98	25.43	16.89
	FALSE	High	[K].EEEEVGFDWSDR.[N]	9.67592e-06	1.93435e-05	4	26	13	CAA91196.1; XP_005251037.1; EAW82172.1; XP_011515432.1	CAA91196.1 [773-784]; XP_005251037.1 [641-652]; EAW82172.1 [663-674]; XP_011515432.1 [641-652]		0	1497.61	1.43	0.838911	145.7	92.2	32	29.43	6.2	10.34	27.3	6.08
	FALSE	High	[R].EGLTSIEEVTK.[N]	5.13395e-06	1.93435e-05	3	26	11	CAA91196.1; XP_005251037.1; XP_011515432.1	CAA91196.1 [4050-4060]; XP_005251037.1 [3918-3928]; XP_011515432.1 [3918-3928]		0	1205.63	0.723	0.801681	90.3	131.8	103.9	30.72	17.38	28.38	8.31	32.58
	FALSE	Medium	[KR].EGVMVAK.[K]	0.171466	0.0119534	3	12	9	EAW94350.1; NP_001005.1; CAA91196.1	EAW94350.1 [56-62]; NP_001005.1 [18-24]; CAA91196.1 [22-28]		0	733.391	1.278	6.09287e-17		148.9	107.2	23.16	19.76		18.54	31.37
	FALSE	High	[K].EGVVGPELHHK.[L]	0.000538914	4.2772e-05	3	25	11	CAA91196.1; XP_005251037.1; XP_011515432.1	CAA91196.1 [2893-2903]; XP_005251037.1 [2761-2771]; XP_011515432.1 [2761-2771]		0	1201.63	1.664	0.995725	77.1	98.9	121.4	19.33	27.59	23.55	39.57	39.23
	FALSE	High	[R].ELAEEAAR.[L]	0.0148027	0.00132206	4	26	39	CAA91196.1; XP_005251037.1; EAW82172.1; XP_011515432.1	CAA91196.1 [1935-1942]; XP_005251037.1 [1803-1810]; EAW82172.1 [1825-1832]; XP_011515432.1 [1803-1810]		0	888.442	1.103	0.995725	103.9	101.4	88.7	25.38	18.25	21.6	6.84	23.05
	FALSE	High	[R].ELAEQELEK.[Q]	0.000254946	4.2772e-05	4	25	32	CAA91196.1; XP_005251037.1; EAW82172.1; XP_011515432.1	CAA91196.1 [1825-1833]; XP_005251037.1 [1693-1701]; EAW82172.1 [1715-1723]; XP_011515432.1 [1693-1701]		0	1088.55	0.938	0.910378	124.1	98.2	91	3.37	1.39	1.77	2.36	1.37
	FALSE	High	[K].ELAQEQAR.[R]	0.012242	0.00109357	4	25	16	CAA91196.1; XP_005251037.1; EAW82172.1; XP_011515432.1	CAA91196.1 [2474-2481]; XP_005251037.1 [2342-2349]; EAW82172.1 [2364-2371]; XP_011515432.1 [2342-2349]		0	944.48	0.866	0.963542	101.2	109.2	99	23.09	21.73	9.61	8.69	12.14
	FALSE	High	[K].ELEEVSPETPVVPATTQR.[T]	4.11865e-11	1.93435e-05	1	4	14	CAA91196.1	CAA91196.1 [144-161]		0	1982.01	0.75	0.887735	93.5	118.5	104.6	3.63	5.54	4.31	8.67	7.69
	FALSE	High	[R].ELEQLGR.[Q]	0.0922342	0.00684346	4	26	22	CAA91196.1; XP_005251037.1; EAW82172.1; XP_011515432.1	CAA91196.1 [1338-1344]; XP_005251037.1 [1206-1212]; EAW82172.1 [1228-1234]; XP_011515432.1 [1206-1212]		0	844.452	1.182	0.611167	145.3	72.7	83.7	17.82	11.16	5.45	12.03	6.43
	FALSE	High	[K].ELIPTEEALR.[L]	0.000230833	4.2772e-05	3	26	17	CAA91196.1; XP_005251037.1; XP_011515432.1	CAA91196.1 [3926-3935]; XP_005251037.1 [3794-3803]; XP_011515432.1 [3794-3803]		0	1170.64	0.805	0.93817	121.8	104.3	96.9	2.33	7.51	5.64	9.55	0.84
	FALSE	High	[K].ELMWLNEK.[E]	0.0996148	0.00732402	4	26	6	CAA91196.1; XP_005251037.1; EAW82172.1; XP_011515432.1	CAA91196.1 [765-772]; XP_005251037.1 [633-640]; EAW82172.1 [655-662]; XP_011515432.1 [633-640]		0	1062.53	2.564	0.0752527	179	52		24.83	5.09	8.11	38.59
	FALSE	High	[K].ELQNAGDR.[L]	0.0262888	0.00211867	4	26	61	CAA91196.1; XP_005251037.1; EAW82172.1; XP_011515432.1	CAA91196.1 [811-818]; XP_005251037.1 [679-686]; EAW82172.1 [701-708]; XP_011515432.1 [679-686]		0	902.433	0.758	0.973563	107.8	110.1	105.4	24.3	28.54	23.47	8.13	23.35
	FALSE	High	[R].ELYQQLQR.[G]	0.00765779	0.000738505	3	25	36	CAA91196.1; XP_005251037.1; XP_011515432.1	CAA91196.1 [3132-3139]; XP_005251037.1 [3000-3007]; XP_011515432.1 [3000-3007]		0	1077.57	0.789	0.996401	111.9	102.7	105.8	5.86	10.43	1.86	6.73	5.84
	FALSE	High	[K].EMELPAK.[E]	0.0839587	0.00634965	4	26	26	CAA91196.1; XP_005251037.1; EAW82172.1; XP_011515432.1	CAA91196.1 [463-469]; XP_005251037.1 [331-337]; EAW82172.1 [353-359]; XP_011515432.1 [331-337]		0	817.412	0.816	0.9512	109	115.7	87.8	2.01	0.84	7.93	3.45	13.59
	FALSE	Medium	[K].EMELPAK.[E]	0.366053	0.0275393	4	26	1	CAA91196.1; XP_005251037.1; EAW82172.1; XP_011515432.1	CAA91196.1 [463-469]; XP_005251037.1 [331-337]; EAW82172.1 [353-359]; XP_011515432.1 [331-337]		0	833.407
	FALSE	High	[K].EMSVYEAYR.[K]	0.00160162	0.000154191	3	26	17	CAA91196.1; XP_005251037.1; XP_011515432.1	CAA91196.1 [4288-4296]; XP_005251037.1 [4156-4164]; XP_011515432.1 [4156-4164]		0	1147.51	0.821	0.889097	155.4	95.6	72.2	8.15	7.98	10.16	10.11	13.46
	FALSE	High	[K].EQAELEAAR.[Q]	0.00457761	0.000502794	4	26	26	CAA91196.1; XP_005251037.1; EAW82172.1; XP_011515432.1	CAA91196.1 [2100-2108]; XP_005251037.1 [1968-1976]; EAW82172.1 [1990-1998]; XP_011515432.1 [1968-1976]		0	1016.5	1.026	0.981218	136.3	87.8	71	8.98	10.03	15.58	30.78	7.92
	FALSE	High	[K].EQLNEYK.[G]	0.136075	0.00975809	4	26	13	CAA91196.1; XP_005251037.1; EAW82172.1; XP_011515432.1	CAA91196.1 [909-915]; XP_005251037.1 [777-783]; EAW82172.1 [799-805]; XP_011515432.1 [777-783]		0	923.447	1.209	0.782044	136.2	84.2	46.9	28.3	6.67	14.45	50.96	16.6
	FALSE	High	[R].EQLQLLEEQHR.[A]	6.83869e-06	1.93435e-05	3	25	24	CAA91196.1; XP_005251037.1; XP_011515432.1	CAA91196.1 [2733-2743]; XP_005251037.1 [2601-2611]; XP_011515432.1 [2601-2611]		0	1422.73	0.919	0.908814	125.2	96.9	77.8	1.46	5.57	12.14	2.6	4.02
	FALSE	High	[K].EQMAQQLAEETQGFQR.[T]	6.28504e-11	1.93435e-05	4	25	14	CAA91196.1; XP_005251037.1; EAW82172.1; XP_011515432.1	CAA91196.1 [2488-2503]; XP_005251037.1 [2356-2371]; EAW82172.1 [2378-2393]; XP_011515432.1 [2356-2371]		0	1893.88	0.881	0.254889	65.2	132.1	126.9	7.25	7.09	6.74	20.97	7.5
	FALSE	High	[R].ESADPLGAWLQDAR.[R]	7.75359e-09	1.93435e-05	4	26	10	CAA91196.1; XP_005251037.1; EAW82172.1; XP_011515432.1	CAA91196.1 [1351-1364]; XP_005251037.1 [1219-1232]; EAW82172.1 [1241-1254]; XP_011515432.1 [1219-1232]		0	1528.74	0.818	0.978758	119.4	105.4	99.5	7.22	2.28	1.4	8.03	0.69
	FALSE	High	[K].ESYSALMR.[E]	0.00796892	0.000755527	4	26	18	CAA91196.1; XP_005251037.1; EAW82172.1; XP_011515432.1	CAA91196.1 [793-800]; XP_005251037.1 [661-668]; EAW82172.1 [683-690]; XP_011515432.1 [661-668]		0	956.451	0.504	0.899778	108.1	117	128.3	11.87	2.43	7.35	27.7	4.56
	FALSE	High	[R].EYGSCSHHYQQLLQSLEQGAQEESR.[C]	3.69389e-10	1.93435e-05	4	26	13	CAA91196.1; XP_005251037.1; EAW82172.1; XP_011515432.1	CAA91196.1 [1094-1118]; XP_005251037.1 [962-986]; EAW82172.1 [984-1008]; XP_011515432.1 [962-986]		0	2965.3	0.35	0.988639	147.7	134.6	70.5	37.08	8.68	5.2	31.08	6.92
	FALSE	High	[K].FAEQTLR.[Q]	0.0306453	0.00249232	4	26	34	CAA91196.1; XP_005251037.1; EAW82172.1; XP_011515432.1	CAA91196.1 [2310-2316]; XP_005251037.1 [2178-2184]; EAW82172.1 [2200-2206]; XP_011515432.1 [2178-2184]		0	864.457	0.963	0.913051	120.1	97.4	105	2.89	5.76	6.05	18.28	3.33
	FALSE	Medium	[K].FKEMELPAK.[E]	0.201623	0.014016	4	26	1	CAA91196.1; XP_005251037.1; EAW82172.1; XP_011515432.1	CAA91196.1 [461-469]; XP_005251037.1 [329-337]; EAW82172.1 [351-359]; XP_011515432.1 [329-337]		1	1092.58	0.585	0.350682	52.8	47.1	329	30.3	14.24	18.55	69.68	16.08
	FALSE	High	[K].FLEGTSCIAGVFVDATK.[E]	2.09586e-09	1.93435e-05	3	26	16	CAA91196.1; XP_005251037.1; XP_011515432.1	CAA91196.1 [4065-4081]; XP_005251037.1 [3933-3949]; XP_011515432.1 [3933-3949]		0	1815.88	0.743	0.994019	122.4	111.2	98.3	3.08	10.12	8.31	7.22	9.12
	FALSE	Medium	[R].FIEQEK.[A]	0.226992	0.0157477	3	25	11	CAA91196.1; XP_005251037.1; XP_011515432.1	CAA91196.1 [2645-2650]; XP_005251037.1 [2513-2518]; XP_011515432.1 [2513-2518]		0	793.409	1.052	0.989732	95.7	112	104.4	4.72	32.71	30.25	17.1	23.72
	FALSE	High	[R].FLEVQYLTGGLIEPDTPGR.[V]	8.96258e-15	1.93435e-05	3	26	7	CAA91196.1; XP_005251037.1; XP_011515432.1	CAA91196.1 [4524-4542]; XP_005251037.1 [4392-4410]; XP_011515432.1 [4392-4410]		0	2105.09	0.779	0.987895	129.1	110.4	82.1	8.07	3.13	4.45	6.23	4.83
	FALSE	High	[R].FLEVQYLTGGLIEPDTPGRVPLDEALQR.[G]	8.93407e-14	1.93435e-05	3	26	14	CAA91196.1; XP_005251037.1; XP_011515432.1	CAA91196.1 [4524-4551]; XP_005251037.1 [4392-4419]; XP_011515432.1 [4392-4419]		1	3126.65	0.825	0.996401	96.4	92.3	156.3	19.65	6.77	6.69	22.16	6.22
	FALSE	High	[R].FLQEEAEK.[M]	0.00260812	0.000239462	4	26	28	CAA91196.1; XP_005251037.1; EAW82172.1; XP_011515432.1	CAA91196.1 [2402-2409]; XP_005251037.1 [2270-2277]; EAW82172.1 [2292-2299]; XP_011515432.1 [2270-2277]		0	993.489	0.714	0.785087	137.7	83.8	101.4	31.31	5.67	7.27	19.42	12.44
	FALSE	High	[K].FISETLR.[R]	0.0371154	0.00310565	4	26	34	CAA91196.1; XP_005251037.1; EAW82172.1; XP_011515432.1	CAA91196.1 [1473-1479]; XP_005251037.1 [1341-1347]; EAW82172.1 [1363-1369]; XP_011515432.1 [1341-1347]		0	865.478	1.037	0.857449	135.5	87.9	93.4	10.49	10.76	5.55	13.69	4.02
	FALSE	High	[R].FPSSFEEIEILWSQFLK.[F]	6.84284e-14	1.93435e-05	4	26	5	CAA91196.1; XP_005251037.1; EAW82172.1; XP_011515432.1	CAA91196.1 [444-460]; XP_005251037.1 [312-328]; EAW82172.1 [334-350]; XP_011515432.1 [312-328]		0	2100.07	0.038	6.09287e-17	9.6	277.5	170.8	54.2	118.98		12.83	22.44
	FALSE	Medium	[R].FRELAEEAAR.[L]	0.423326	0.0338186	4	26	1	CAA91196.1; XP_005251037.1; EAW82172.1; XP_011515432.1	CAA91196.1 [1933-1942]; XP_005251037.1 [1801-1810]; EAW82172.1 [1823-1832]; XP_011515432.1 [1801-1810]		1	1191.61					500					12.56
	FALSE	High	[R].GANVIAGVWLEEAGQK.[L]	9.62642e-09	1.93435e-05	3	25	19	CAA91196.1; XP_005251037.1; XP_011515432.1	CAA91196.1 [3159-3174]; XP_005251037.1 [3027-3042]; XP_011515432.1 [3027-3042]		0	1641.86	0.902	0.996527	111.9	101.7	102.6	8.76	2.54	1.52	10.18	0.11
	FALSE	High	[R].GAQEVGER.[L]	0.0413161	0.00338982	4	26	10	CAA91196.1; XP_005251037.1; EAW82172.1; XP_011515432.1	CAA91196.1 [1292-1299]; XP_005251037.1 [1160-1167]; EAW82172.1 [1182-1189]; XP_011515432.1 [1160-1167]		0	845.411	17.23	2.26504e-06	68.1	31.3	102	28.61	8.77	10.84	116.33	78.41
	FALSE	High	[R].GCLDEETSR.[A]	0.00212564	0.000195525	3	25	32	CAA91196.1; XP_005251037.1; XP_011515432.1	CAA91196.1 [3298-3306]; XP_005251037.1 [3166-3174]; XP_011515432.1 [3166-3174]		0	1067.43	1.202	0.491438	146.5	80.1	84.9	8.7	17.31	18.59	10.86	5.34
	FALSE	High	[K].GDECQLVGPAQPSHWK.[V]	1.40583e-10	1.93435e-05	4	26	12	CAA91196.1; XP_005251037.1; EAW82172.1; XP_011515432.1	CAA91196.1 [962-977]; XP_005251037.1 [830-845]; EAW82172.1 [852-867]; XP_011515432.1 [830-845]		0	1809.82	1.133	0.961454	123.4	96.3	58.7	3.3	6.35	8.03	16.09	3.91
	FALSE	High	[K].GFFDPNTEENLTYLQLMER.[C]	2.87612e-12	1.93435e-05	3	26	10	CAA91196.1; XP_005251037.1; XP_011515432.1	CAA91196.1 [4226-4244]; XP_005251037.1 [4094-4112]; XP_011515432.1 [4094-4112]		0	2317.08	0.331	0.98524	159.4	113.4	82.7	46.59	52.5	31.49	24.15	34.89
	FALSE	High	[K].GFFDPNTEENLTYLQLMER.[C]	3.08603e-12	1.93435e-05	3	26	7	CAA91196.1; XP_005251037.1; XP_011515432.1	CAA91196.1 [4226-4244]; XP_005251037.1 [4094-4112]; XP_011515432.1 [4094-4112]		0	2333.08	100	6.09287e-17	137.2	62.3	62.1	15.06	54.18	37.48		56.25
	FALSE	High	[K].GFFDPNTHENLTYLQLLER.[C]	2.98473e-11	1.93435e-05	4	33	5	CAA91196.1; XP_005251037.1; XP_016869381.1; XP_011515432.1	CAA91196.1 [2989-3007]; XP_005251037.1 [2857-2875]; XP_016869381.1 [799-817]; [1760-1778]; XP_011515432.1 [2857-2875]		0	2307.14	0.828	0.906798	132.5	94.6	90	15.04	5.35	7.79	12.68	3
	FALSE	High	[K].GFFDPNTHENLTYR.[Q]	1.47838e-10	1.93435e-05	3	25	27	CAA91196.1; XP_005251037.1; XP_011515432.1	CAA91196.1 [3648-3661]; XP_005251037.1 [3516-3529]; XP_011515432.1 [3516-3529]		0	1710.79	1	0.869908	113	92.9	99.9	3.45	2.11	4.5	14.54	6.81
	FALSE	High	[R].GGAEGELQALR.[A]	0.000197864	4.2772e-05	4	25	13	CAA91196.1; XP_005251037.1; EAW82172.1; XP_011515432.1	CAA91196.1 [1606-1616]; XP_005251037.1 [1474-1484]; EAW82172.1 [1496-1506]; XP_011515432.1 [1474-1484]		0	1100.57	0.667	0.739859	91.2	122.8	125.7	22.95	0.55	24.31	4.23	2.06
	FALSE	High	[K].GGELVYTDSEAR.[D]	6.24671e-06	1.93435e-05	3	24	28	CAA91196.1; XP_005251037.1; XP_011515432.1	CAA91196.1 [3028-3039]; XP_005251037.1 [2896-2907]; XP_011515432.1 [2896-2907]		0	1296.61	0.971	0.963595	117.5	97.2	92	3.85	3.62	7.96	17.55	20.37
	FALSE	High	[K].GHLSGLAK.[R]	0.0101937	0.000875016	4	26	24	CAA91196.1; XP_005251037.1; EAW82172.1; XP_011515432.1	CAA91196.1 [916-923]; XP_005251037.1 [784-791]; EAW82172.1 [806-813]; XP_011515432.1 [784-791]		0	782.452	0.613	0.88519	129	98.5	97.7	21.64	17.3	17.6	53.62	9.9
	FALSE	High	[R].GLFDEEMNEILTDPSDDTK.[G]	7.4302e-13	1.93435e-05	3	26	15	CAA91196.1; XP_005251037.1; XP_011515432.1	CAA91196.1 [4207-4225]; XP_005251037.1 [4075-4093]; XP_011515432.1 [4075-4093]		0	2168.95	0.76	0.988108	111	106.3	101.4	10.26	6.44	2.23	5.69	3.31
	FALSE	High	[R].GLFDEEMNEILTDPSDDTK.[G]	3.69202e-13	1.93435e-05	3	26	5	CAA91196.1; XP_005251037.1; XP_011515432.1	CAA91196.1 [4207-4225]; XP_005251037.1 [4075-4093]; XP_011515432.1 [4075-4093]		0	2184.95	100	6.09287e-17	93.2	77.4	95.8	45.82	62.32	48.51
	FALSE	High	[K].GIIRPGTAFELLEAQAATGYVIDPIK.[G]	4.17918e-14	1.93435e-05	3	26	6	CAA91196.1; XP_005251037.1; XP_011515432.1	CAA91196.1 [4093-4118]; XP_005251037.1 [3961-3986]; XP_011515432.1 [3961-3986]		0	2743.5	0.526	0.986139	119.4	104.4	132.2	21.58	3.55	10.12	7.57	5.62
	FALSE	High	[K].GLLSAEVAR.[L]	0.00326076	0.000367025	3	26	22	CAA91196.1; XP_005251037.1; XP_011515432.1	CAA91196.1 [3850-3858]; XP_005251037.1 [3718-3726]; XP_011515432.1 [3718-3726]		0	915.526	0.614	0.747015	86.8	120.2	153	9.32	6.87	17.35	10.13	18.65
	FALSE	High	[K].GLVEDTLR.[Q]	0.0304833	0.00249232	4	26	30	CAA91196.1; XP_005251037.1; EAW82172.1; XP_011515432.1	CAA91196.1 [2048-2055]; XP_005251037.1 [1916-1923]; EAW82172.1 [1938-1945]; XP_011515432.1 [1916-1923]		0	902.494	0.784	0.988852	114	108.1	106.3	5.8	9.77	15	11.14	1.43
	FALSE	High	[K].GLVGPELHDR.[L]	2.2975e-05	1.93435e-05	3	26	26	CAA91196.1; XP_005251037.1; XP_011515432.1	CAA91196.1 [3888-3897]; XP_005251037.1 [3756-3765]; XP_011515432.1 [3756-3765]		0	1092.58	0.931	0.987247	111.3	94.3	97.8	7.9	8.12	8.16	13.1	4.28
	FALSE	High	[K].GIYQSLEGAVQAGQLK.[V]	2.79201e-09	1.93435e-05	4	26	18	CAA91196.1; XP_005251037.1; EAW82172.1; XP_011515432.1	CAA91196.1 [478-493]; XP_005251037.1 [346-361]; EAW82172.1 [368-383]; XP_011515432.1 [346-361]		0	1661.89	0.869	0.970092	118.4	98.7	99.1	4.14	4.86	1.5	1.44	1.94
	FALSE	High	[R].GPLPTEEQR.[VL]	0.00921484	0.000802402	1	4	8	CAA91196.1	CAA91196.1 [130-138]		0	1026.52	0.75	0.772378	85.6	115.6	113.3	8.1	7.55	7.54	10.92	11
	FALSE	High	[K].GRLCFEGLR.[S]	0.0234119	0.00181324	3	25	2	CAA91196.1; XP_005251037.1; XP_011515432.1	CAA91196.1 [3107-3115]; XP_005251037.1 [2975-2983]; XP_011515432.1 [2975-2983]		1	1108.56	7.238	0.329724	130.2	44.2	62.9	75.69	6.14	0.41	10.31	27.5
	FALSE	High	[R].GRLPLLAVCDYK.[Q]	1.23797e-05	1.93435e-05	4	26	8	CAA91196.1; XP_005251037.1; EAW82172.1; XP_011515432.1	CAA91196.1 [942-953]; XP_005251037.1 [810-821]; EAW82172.1 [832-843]; XP_011515432.1 [810-821]		1	1405.75	0.589	0.977874	111.8	108.4	133.9	11.05	12.86	7.9	20.03	2.31
	FALSE	High	[R].GTQGAEEVLR.[A]	0.000211077	4.2772e-05	4	26	20	CAA91196.1; XP_005251037.1; EAW82172.1; XP_011515432.1	CAA91196.1 [1234-1243]; XP_005251037.1 [1102-1111]; EAW82172.1 [1124-1133]; XP_011515432.1 [1102-1111]		0	1059.54	0.994	0.953583	91.7	108.5	86.5	18.3	4.51	8.03	17.57	5.02
	FALSE	High	[K].GWLYYEAGQR.[F]	0.00123628	0.000154191	3	26	9	CAA91196.1; XP_005251037.1; XP_011515432.1	CAA91196.1 [4514-4523]; XP_005251037.1 [4382-4391]; XP_011515432.1 [4382-4391]		0	1242.59	4.401	3.88448e-05	183.4	14.5	129.4	39.57	8.72	9.17	87.73	17.45
	FALSE	High	[CR].GYFDEEMNR.[IV]	0.00354074	0.000427246	4	34	11	CAA91196.1; XP_005251037.1; XP_016869381.1; XP_011515432.1	CAA91196.1 [2970-2978]; XP_005251037.1 [2838-2846]; XP_016869381.1 [1741-1749]; [2399-2407]; [2935-2943]; [3466-3474]; [4000-4008]; XP_011515432.1 [2838-2846]		0	1160.47	0.901	0.882338	131.2	93	85.3	12.04	4.26	3.69	5.12	3.53
	FALSE	Medium	[CR].GYFDEEMNR.[IV]	0.146394	0.010381	4	34	2	CAA91196.1; XP_005251037.1; XP_016869381.1; XP_011515432.1	CAA91196.1 [2970-2978]; XP_005251037.1 [2838-2846]; XP_016869381.1 [1741-1749]; [2399-2407]; [2935-2943]; [3466-3474]; [4000-4008]; XP_011515432.1 [2838-2846]		0	1176.46	100	6.09287e-17	178.5		99	70.9	16.7	30.48
	FALSE	High	[R].GYFSEEMNR.[V]	0.00198535	0.000195525	3	25	31	CAA91196.1; XP_005251037.1; XP_011515432.1	CAA91196.1 [3629-3637]; XP_005251037.1 [3497-3505]; XP_011515432.1 [3497-3505]		0	1132.47	1.093	0.83507	125.6	81.9	101.2	0.61	17.8	20.77	14.09	8.2
	FALSE	High	[R].GYFSEEMNR.[V]	0.0224477	0.00170588	3	25	3	CAA91196.1; XP_005251037.1; XP_011515432.1	CAA91196.1 [3629-3637]; XP_005251037.1 [3497-3505]; XP_011515432.1 [3497-3505]		0	1148.47	0.463	0.261146	133.6	66	74	48.1	10.99	34.04	67.08	7.77
	FALSE	High	[K].GYYSPYSVSGSGSTAGSR.[T]	5.61892e-09	1.93435e-05	3	26	3	CAA91196.1; XP_005251037.1; XP_011515432.1	CAA91196.1 [4610-4627]; XP_005251037.1 [4478-4495]; XP_011515432.1 [4478-4495]		0	1782.79					500					20.07
	FALSE	High	[R].HHTAAFEER.[R]	0.053322	0.00421755	4	26	11	CAA91196.1; XP_005251037.1; EAW82172.1; XP_011515432.1	CAA91196.1 [434-442]; XP_005251037.1 [302-310]; EAW82172.1 [324-332]; XP_011515432.1 [302-310]		0	1097.51	0.479	0.0760166	79.5	169.3	96.3	12.98	15.77	20.53	7.13	5.22
	FALSE	High	[R].HKPLLIDMNK.[V]	0.000631175	6.84312e-05	4	26	19	CAA91196.1; XP_005251037.1; EAW82172.1; XP_011515432.1	CAA91196.1 [337-346]; XP_005251037.1 [205-214]; EAW82172.1 [227-236]; XP_011515432.1 [209-218]		0	1208.68	0.318	0.937846	104	102.5	162.9	24.89	31.44	16.33	27.46	22.6
	FALSE	High	[R].HISDLYEDLR.[D]	6.31994e-08	1.93435e-05	4	26	13	CAA91196.1; XP_005251037.1; EAW82172.1; XP_011515432.1	CAA91196.1 [199-208]; XP_005251037.1 [67-76]; EAW82172.1 [89-98]; XP_011515432.1 [71-80]		0	1260.62	0.767	0.991058	108	110.8	115.5	8.43	12.48	9.01	9.63	7.92
	FALSE	High	[R].HPQGEQMYR.[R]	2.44032e-05	1.93435e-05	4	26	30	CAA91196.1; XP_005251037.1; EAW82172.1; XP_011515432.1	CAA91196.1 [601-609]; XP_005251037.1 [469-477]; EAW82172.1 [491-499]; XP_011515432.1 [469-477]		0	1145.52	1.115	0.990354	104.3	91.7	102.2	12.27	17.71	28.59	6.46	6.36
	FALSE	High	[R].HPQGEQMYR.[R]	0.108703	0.00806051	4	26	4	CAA91196.1; XP_005251037.1; EAW82172.1; XP_011515432.1	CAA91196.1 [601-609]; XP_005251037.1 [469-477]; EAW82172.1 [491-499]; XP_011515432.1 [469-477]		0	1161.51	1.873	0.467274	197.9	87.5	61.1	70.39	43.79	11.2	76.48	4.65
	FALSE	Medium	[R].HYLQGR.[S]	0.338375	0.0248041	3	25	11	CAA91196.1; XP_005251037.1; XP_011515432.1	CAA91196.1 [2827-2832]; XP_005251037.1 [2695-2700]; XP_011515432.1 [2695-2700]		0	773.405	0.655	0.957907	117.4	124.6	80.1	12.76	14.75	12.97	10.61	6.65
	FALSE	Medium	[R].KAALEEVER.[L]	0.500199	0.042583	4	26	1	CAA91196.1; XP_005251037.1; EAW82172.1; XP_011515432.1	CAA91196.1 [2142-2150]; XP_005251037.1 [2010-2018]; EAW82172.1 [2032-2040]; XP_011515432.1 [2010-2018]		1	1044.57
	FALSE	High	[R].KASDSELER.[Q]	0.00186333	0.000154191	4	26	16	CAA91196.1; XP_005251037.1; EAW82172.1; XP_011515432.1	CAA91196.1 [2037-2045]; XP_005251037.1 [1905-1913]; EAW82172.1 [1927-1935]; XP_011515432.1 [1905-1913]		1	1034.51	0.872	0.719764	74	117.6	134	19.15	5.66	8.77	14.9	14.19
	FALSE	High	[K].KELIPTEEALR.[L]	0.0292189	0.00234049	3	26	6	CAA91196.1; XP_005251037.1; XP_011515432.1	CAA91196.1 [3925-3935]; XP_005251037.1 [3793-3803]; XP_011515432.1 [3793-3803]		1	1298.73	1.44	0.9933	104.2	90.1	53	5.01	9.48	5.02	30.97	5.89
	FALSE	High	[K].KESYSALMR.[E]	0.0138444	0.0012172	4	26	4	CAA91196.1; XP_005251037.1; EAW82172.1; XP_011515432.1	CAA91196.1 [792-800]; XP_005251037.1 [660-668]; EAW82172.1 [682-690]; XP_011515432.1 [660-668]		1	1084.55	0.01	6.09287e-17		174.5	325.5				70.48	39.98
	FALSE	High	[R].KGLVGPELHDR.[L]	1.72879e-07	1.93435e-05	3	26	9	CAA91196.1; XP_005251037.1; XP_011515432.1	CAA91196.1 [3887-3897]; XP_005251037.1 [3755-3765]; XP_011515432.1 [3755-3765]		1	1220.67	0.597	0.351972	79.9	111.3	124.1	28.34	19.15	39.18	42.01	47.34
	FALSE	High	[R].KQAEEIGEK.[L]	0.000206921	4.2772e-05	4	25	17	CAA91196.1; XP_005251037.1; EAW82172.1; XP_011515432.1	CAA91196.1 [2545-2553]; XP_005251037.1 [2413-2421]; EAW82172.1 [2435-2443]; XP_011515432.1 [2413-2421]		1	1031.54	0.539	0.979924	107.7	111.8	133.8	34.67	34.07	17.73	30.4	9.76
	FALSE	High	[R].KQEELQQLEQQR.[R]	7.68625e-11	1.93435e-05	3	25	40	CAA91196.1; XP_005251037.1; XP_011515432.1	CAA91196.1 [2706-2717]; XP_005251037.1 [2574-2585]; XP_011515432.1 [2574-2585]		1	1556.8	0.706	0.638927	91.9	129.8	96.1	3.86	11.27	10.98	8.48	5.82
	FALSE	High	[R].KQITMEELVR.[S]	0.00223182	0.000195525	3	26	2	CAA91196.1; XP_005251037.1; XP_011515432.1	CAA91196.1 [4027-4036]; XP_005251037.1 [3895-3904]; XP_011515432.1 [3895-3904]		1	1246.68	0.127	0.0621309	92.3	238.2	45.5	92.27		32.45	67.43	11.29
	FALSE	High	[R].LAAEQELIR.[L]	0.000326768	4.2772e-05	4	25	19	CAA91196.1; XP_005251037.1; EAW82172.1; XP_011515432.1	CAA91196.1 [1846-1854]; XP_005251037.1 [1714-1722]; EAW82172.1 [1736-1744]; XP_011515432.1 [1714-1722]		0	1042.59	1.055	0.783716	120.8	88.2	98.7	11.39	1.79	12.77	3.05	8.25
	FALSE	High	[K].LAAIGEATR.[L]	0.00229804	0.000195525	4	26	23	CAA91196.1; XP_005251037.1; EAW82172.1; XP_011515432.1	CAA91196.1 [1976-1984]; XP_005251037.1 [1844-1852]; EAW82172.1 [1866-1874]; XP_011515432.1 [1844-1852]		0	901.51	0.948	0.810223	112.8	96.1	101.3	7.24	5.39	5.21	15.97	29.65
	FALSE	High	[R].LAEDEAFQR.[R]	0.0002666	4.2772e-05	4	26	24	CAA91196.1; XP_005251037.1; EAW82172.1; XP_011515432.1	CAA91196.1 [2006-2014]; XP_005251037.1 [1874-1882]; EAW82172.1 [1896-1904]; XP_011515432.1 [1874-1882]		0	1078.52	1.059	0.960983	107.2	110.9	94.5	20.01	29.35	5.1	20.5	1.01
	FALSE	High	[R].LAEVEAALEK.[Q]	2.16304e-05	1.93435e-05	4	25	15	CAA91196.1; XP_005251037.1; EAW82172.1; XP_011515432.1	CAA91196.1 [1499-1508]; XP_005251037.1 [1367-1376]; EAW82172.1 [1389-1398]; XP_011515432.1 [1367-1376]		0	1072.59	0.928	0.988639	107.9	97.5	91.7	13.17	13.1	5.95	5.17	9.01
	FALSE	High	[R].LAQGHTTVDELAR.[R]	9.95312e-10	1.93435e-05	3	25	30	CAA91196.1; XP_005251037.1; XP_011515432.1	CAA91196.1 [2809-2821]; XP_005251037.1 [2677-2689]; XP_011515432.1 [2677-2689]		0	1410.73	0.794	0.680593	141.9	85.7	89.6	25.63	1.48	2.18	5.38	11.31
	FALSE	High	[R].LCFEGLR.[S]	0.0834946	0.00628824	3	25	17	CAA91196.1; XP_005251037.1; XP_011515432.1	CAA91196.1 [3109-3115]; XP_005251037.1 [2977-2983]; XP_011515432.1 [2977-2983]		0	895.434	100	6.09287e-17	160	2	109.9	106.34	10.35	9.64		85.26
	FALSE	High	[R].LDLQYAK.[L]	0.0308082	0.00249232	4	26	23	CAA91196.1; XP_005251037.1; EAW82172.1; XP_011515432.1	CAA91196.1 [734-740]; XP_005251037.1 [602-608]; EAW82172.1 [624-630]; XP_011515432.1 [602-608]		0	850.467	0.824	0.974464	106.5	105.7	113.5	15.31	11.52	2.44	6.97	8.5
	FALSE	High	[R].LEAEAGR.[F]	0.0897236	0.00663537	4	26	24	CAA91196.1; XP_005251037.1; EAW82172.1; XP_011515432.1	CAA91196.1 [1926-1932]; XP_005251037.1 [1794-1800]; EAW82172.1 [1816-1822]; XP_011515432.1 [1794-1800]		0	745.384	0.825	0.976216	112.6	114.5	71.3	10.58	14.71	4.46	23.35	18.82
	FALSE	Medium	[R].LECLQR.[I]	0.195865	0.0136042	4	26	29	CAA91196.1; XP_005251037.1; EAW82172.1; XP_011515432.1	CAA91196.1 [528-533]; XP_005251037.1 [396-401]; EAW82172.1 [418-423]; XP_011515432.1 [396-401]		0	819.403	0.892	0.906235	128.5	96.9	104	6.07	6.1	8.17	6.71	5.4
	FALSE	High	[R].LEDLLQDAQDEK.[E]	2.27995e-07	1.93435e-05	4	26	16	CAA91196.1; XP_005251037.1; EAW82172.1; XP_011515432.1	CAA91196.1 [897-908]; XP_005251037.1 [765-776]; EAW82172.1 [787-798]; XP_011515432.1 [765-776]		0	1416.69	1.066	0.950492	126.3	108	57.8	8.81	1.61	2.74	21.65	2.82
	FALSE	High	[R].LEDLLQDAQDEKEQLNEYK.[G]	1.2562e-11	1.93435e-05	4	26	5	CAA91196.1; XP_005251037.1; EAW82172.1; XP_011515432.1	CAA91196.1 [897-915]; XP_005251037.1 [765-783]; EAW82172.1 [787-805]; XP_011515432.1 [765-783]		1	2321.11	0.01	6.09287e-17		163.6	336.4				45.22	1.92
	FALSE	High	[K].LEQLFQDEVAK.[A]	9.43564e-06	1.93435e-05	3	25	15	CAA91196.1; XP_005251037.1; XP_011515432.1	CAA91196.1 [2653-2663]; XP_005251037.1 [2521-2531]; XP_011515432.1 [2521-2531]		0	1319.68	0.962	0.919606	130.7	101.8	75.3	8.94	3.28	0.61	15.8	5
	FALSE	High	[R].LFNAIIHR.[H]	1.6079e-05	1.93435e-05	4	26	32	CAA91196.1; XP_005251037.1; EAW82172.1; XP_011515432.1	CAA91196.1 [329-336]; XP_005251037.1 [197-204]; EAW82172.1 [219-226]; XP_011515432.1 [201-208]		0	983.579	0.428	0.0392013	64	172	106.1	10.79	9.2	23.28	12.61	14.8
	FALSE	High	[K].LHVAILER.[E]	0.0104023	0.000875016	4	26	11	CAA91196.1; XP_005251037.1; EAW82172.1; XP_011515432.1	CAA91196.1 [510-517]; XP_005251037.1 [378-385]; EAW82172.1 [400-407]; XP_011515432.1 [378-385]		0	950.578	0.693	0.844629	110	123.6	91.4	13.48	3.78	7.36	27.33	14.34
	FALSE	High	[R].LKAEAELLQQQK.[E]	1.0348e-07	1.93435e-05	4	25	24	CAA91196.1; XP_005251037.1; EAW82172.1; XP_011515432.1	CAA91196.1 [2462-2473]; XP_005251037.1 [2330-2341]; EAW82172.1 [2352-2363]; XP_011515432.1 [2330-2341]		1	1398.8	0.876	0.948279	106.3	90.1	137.6	2.9	6.45	24.39	30.47	3.88
	FALSE	High	[R].LKAEATEAAR.[Q]	0.00184523	0.000154191	4	26	7	CAA91196.1; XP_005251037.1; EAW82172.1; XP_011515432.1	CAA91196.1 [2349-2358]; XP_005251037.1 [2217-2226]; EAW82172.1 [2239-2248]; XP_011515432.1 [2217-2226]		1	1059.58	1.03	0.911379	95.6	92.2	128.4	6.09	85.12	19.76	12.98	6.15
	FALSE	High	[R].LKTEAEIALK.[E]	0.000894994	9.10162e-05	4	26	13	CAA91196.1; XP_005251037.1; EAW82172.1; XP_011515432.1	CAA91196.1 [1985-1994]; XP_005251037.1 [1853-1862]; EAW82172.1 [1875-1884]; XP_011515432.1 [1853-1862]		1	1115.67	0.761	0.944222	85.1	93.4	240	88.51	8.83	10.94	87.64	16.55
	FALSE	High	[R].LLDAQLATGGIVDPR.[L]	9.24663e-09	1.93435e-05	3	26	13	CAA91196.1; XP_005251037.1; XP_011515432.1	CAA91196.1 [3936-3950]; XP_005251037.1 [3804-3818]; XP_011515432.1 [3804-3818]		0	1538.85	0.852	0.957907	122.9	99.3	100.8	0.61	3.21	3	6.75	2.78
	FALSE	High	[R].LLDAQLSTGGIVDPSK.[S]	2.11315e-10	1.93435e-05	3	25	15	CAA91196.1; XP_005251037.1; XP_011515432.1	CAA91196.1 [3270-3285]; XP_005251037.1 [3138-3153]; XP_011515432.1 [3138-3153]		0	1613.87	0.78	0.981442	121.8	103.7	99.3	1.35	6.29	2.15	2.38	1.32
	FALSE	High	[R].LLDPEDVDVPQPDEK.[S]	2.88676e-10	1.93435e-05	4	26	18	CAA91196.1; XP_005251037.1; EAW82172.1; XP_011515432.1	CAA91196.1 [372-386]; XP_005251037.1 [240-254]; EAW82172.1 [262-276]; XP_011515432.1 [244-258]		0	1708.83	0.878	0.859034	128.1	100.4	82	10.45	3.5	4.62	3.51	3.36
	FALSE	High	[R].LLEAAAQSTK.[G]	9.8919e-05	1.93435e-05	3	26	30	CAA91196.1; XP_005251037.1; XP_011515432.1	CAA91196.1 [4600-4609]; XP_005251037.1 [4468-4477]; XP_011515432.1 [4468-4477]		0	1031.57	0.836	0.545246	155.3	82.7	99.8	24.03	12.03	4.18	21.3	9.83
	FALSE	High	[R].LLEAQACTGGIIDPSTGER.[FL]	2.42266e-15	1.93435e-05	3	26	15	CAA91196.1; XP_005251037.1; XP_011515432.1	CAA91196.1 [4448-4466]; XP_005251037.1 [4316-4334]; XP_011515432.1 [4316-4334]		0	1988.96	0.859	0.918121	143.8	98.9	68.3	4.09	11.27	7.9	4.26	9.45
	FALSE	High	[R].LLEAQIATGGIIDPEESHR.[L]	2.72629e-11	1.93435e-05	3	26	10	CAA91196.1; XP_005251037.1; XP_011515432.1	CAA91196.1 [4179-4197]; XP_005251037.1 [4047-4065]; XP_011515432.1 [4047-4065]		0	2049.06	0.675	0.95648	139.3	114.3	75	13.85	14.98	3.49	12.9	3.42
	FALSE	High	[R].LLEAQIATGGVIDPVHSHR.[V]	1.13594e-11	1.93435e-05	4	34	13	CAA91196.1; XP_005251037.1; XP_016869381.1; XP_011515432.1	CAA91196.1 [2942-2960]; XP_005251037.1 [2810-2828]; XP_016869381.1 [752-770]; [2371-2389]; [2907-2925]; [3438-3456]; [3972-3990]; XP_011515432.1 [2810-2828]		0	2013.09	0.143	0.924339	139.5	128.2	142	8.35	7.1	10.49	17.94	8.23
	FALSE	High	[R].LLFNDVQTLK.[D]	0.000215317	4.2772e-05	4	26	9	CAA91196.1; XP_005251037.1; EAW82172.1; XP_011515432.1	CAA91196.1 [588-597]; XP_005251037.1 [456-465]; EAW82172.1 [478-487]; XP_011515432.1 [456-465]		0	1190.68	0.796	0.989836	105.5	113.2	106.8	1.21	2.85	1.99	2
	FALSE	High	[R].LLLEAQAATGFLLDPVK.[G]	2.06066e-10	1.93435e-05	3	26	12	CAA91196.1; XP_005251037.1; XP_011515432.1	CAA91196.1 [3859-3875]; XP_005251037.1 [3727-3743]; XP_011515432.1 [3727-3743]		0	1799.03	0.01	6.09287e-17	9.3	315	175.7			17.13
	FALSE	High	[R].LLLEAQAATGFLLDPVKGER.[L]	1.36655e-09	1.93435e-05	3	26	10	CAA91196.1; XP_005251037.1; XP_011515432.1	CAA91196.1 [3859-3878]; XP_005251037.1 [3727-3746]; XP_011515432.1 [3727-3746]		1	2141.2	0.01	0.93032	157.1	94.5	136.9		67.33	39.04	27.87	21.43
	FALSE	High	[K].ILITIVEEVETLR.[Q]	1.00403e-07	1.93435e-05	3	25	20	CAA91196.1; XP_005251037.1; XP_011515432.1	CAA91196.1 [3424-3436]; XP_005251037.1 [3292-3304]; XP_011515432.1 [3292-3304]		0	1527.9	0.653	1	131.3	107.5	79.4	19.43	7.21	10.71	11.77	7.22
	FALSE	High	[K].IIITVVEEQEQK.[G]	3.92573e-07	1.93435e-05	3	25	33	CAA91196.1; XP_005251037.1; XP_011515432.1	CAA91196.1 [3095-3106]; XP_005251037.1 [2963-2974]; XP_011515432.1 [2963-2974]		0	1428.79	0.633	0.999335	117.8	112.3	123	13.7	7.96	2.94	2.8	5.29
	FALSE	High	[K].LLLWSQR.[M]	0.0272783	0.00215105	4	26	9	CAA91196.1; XP_005251037.1; EAW82172.1; XP_011515432.1	CAA91196.1 [301-307]; XP_005251037.1 [169-175]; EAW82172.1 [191-197]; XP_011515432.1 [173-179]		0	915.541	0.658	0.785305	153.2	93.5	90.5	6.67	8.62	8.31	2.41	21.98
	FALSE	High	[R].IISLETYNLLR.[E]	7.81828e-05	1.93435e-05	3	26	3	CAA91196.1; XP_005251037.1; XP_011515432.1	CAA91196.1 [3794-3804]; XP_005251037.1 [3662-3672]; XP_011515432.1 [3662-3672]		0	1334.77	100				243.9	7.74				7.89
	FALSE	High	[K].LISLFQAMK.[K]	0.000422864	4.2772e-05	3	26	12	CAA91196.1; XP_005251037.1; XP_011515432.1	CAA91196.1 [4159-4167]; XP_005251037.1 [4027-4035]; XP_011515432.1 [4027-4035]		0	1050.6	0.513	0.395213	194.1	83.9	74.3	20.84	5.21	17.77	2.59	14.08
	FALSE	Medium	[R].INLAQK.[A]	0.523313	0.0458952	3	26	14	CAA91196.1; XP_005251037.1; XP_011515432.1	CAA91196.1 [4486-4491]; XP_005251037.1 [4354-4359]; XP_011515432.1 [4354-4359]		0	686.42	1.189	0.973563	104.7	99.1	93.4	20.92	6.87	10.46	21.94	14.23
	FALSE	High	[R].LPLDKEPAR.[E]	0.000181817	4.2772e-05	4	26	34	CAA91196.1; XP_005251037.1; EAW82172.1; XP_011515432.1	CAA91196.1 [1146-1154]; XP_005251037.1 [1014-1022]; EAW82172.1 [1036-1044]; XP_011515432.1 [1014-1022]		1	1038.59	1.066	0.949323	120.4	96.6	79.1	1.38	3.72	8.21	17.64	10.61
	FALSE	High	[R].LPLLAVCDYK.[Q]	0.00011265	1.93435e-05	4	26	1	CAA91196.1; XP_005251037.1; EAW82172.1; XP_011515432.1	CAA91196.1 [944-953]; XP_005251037.1 [812-821]; EAW82172.1 [834-843]; XP_011515432.1 [812-821]		0	1192.63
	FALSE	High	[R].LPVEVAYK.[R]	0.00257033	0.000217647	3	26	12	CAA91196.1; XP_005251037.1; XP_011515432.1	CAA91196.1 [4198-4205]; XP_005251037.1 [4066-4073]; XP_011515432.1 [4066-4073]		0	918.529	0.995	0.602447	143.7	84	61.8	11.2	4.32	8.36	18.8	13.31
	FALSE	Medium	[R].LPVTDAVNK.[G]	0.304125	0.0216875	1	1	3	CAA91196.1	CAA91196.1 [4467-4475]		0	956.541	1.516	0.897721	108.3	78.6	71.3	5.02	5.49	10.36	21.53
	FALSE	High	[R].LQAEEAER.[RW]	0.00405508	0.000483359	4	25	35	CAA91196.1; XP_005251037.1; EAW82172.1; XP_011515432.1	CAA91196.1 [1680-1687]; XP_005251037.1 [1548-1555]; EAW82172.1 [1570-1577]; XP_011515432.1 [1548-1555]		0	945.464	1.452	0.499685	136.7	78.9	97.7	16.19	14.07	7.33	27.94	2.26
	FALSE	High	[R].LQEAGILSAEELQR.[L]	7.46144e-08	1.93435e-05	3	25	17	CAA91196.1; XP_005251037.1; XP_011515432.1	CAA91196.1 [2795-2808]; XP_005251037.1 [2663-2676]; XP_011515432.1 [2663-2676]		0	1556.83	0.947	0.780059	124.2	93.2	94.6	1.33	2.93	4.43	4.62	9.1
	FALSE	High	[R].LQEDKEQMAQQLAEETQGFQR.[T]	4.40295e-13	1.93435e-05	4	25	15	CAA91196.1; XP_005251037.1; EAW82172.1; XP_011515432.1	CAA91196.1 [2483-2503]; XP_005251037.1 [2351-2371]; EAW82172.1 [2373-2393]; XP_011515432.1 [2351-2371]		1	2507.18	0.587	0.974952	119	114.7	130.9	3.96	11.68	8.14	17.18	7.64
	FALSE	High	[R].LQLEACETR.[T]	0.000394524	4.2772e-05	4	26	35	CAA91196.1; XP_005251037.1; EAW82172.1; XP_011515432.1	CAA91196.1 [1131-1139]; XP_005251037.1 [999-1007]; EAW82172.1 [1021-1029]; XP_011515432.1 [999-1007]		0	1120.53	0.92	0.990383	98.4	100.3	122.1	11.11	3.93	7.66	13.92	3.14
	FALSE	High	[R].LQLEATER.[Q]	0.00321368	0.000367025	4	25	57	CAA91196.1; XP_005251037.1; EAW82172.1; XP_011515432.1	CAA91196.1 [1596-1603]; XP_005251037.1 [1464-1471]; EAW82172.1 [1486-1493]; XP_011515432.1 [1464-1471]		0	959.516	0.778	0.959601	104.7	107	115.6	11.39	5.88	1.77	3.19	19.83
	FALSE	High	[R].LQLEETDHQK.[N]	1.20723e-05	1.93435e-05	4	26	35	CAA91196.1; XP_005251037.1; EAW82172.1; XP_011515432.1	CAA91196.1 [2330-2339]; XP_005251037.1 [2198-2207]; EAW82172.1 [2220-2229]; XP_011515432.1 [2198-2207]		0	1240.62	1.071	0.645692	131.3	84	107.6	13.41	8.16	12.12	11.21	6.96
	FALSE	High	[K].LQNVQIALDYLR.[H]	4.36999e-05	1.93435e-05	4	26	15	CAA91196.1; XP_005251037.1; EAW82172.1; XP_011515432.1	CAA91196.1 [237-248]; XP_005251037.1 [105-116]; EAW82172.1 [127-138]; XP_011515432.1 [109-120]		0	1445.81	0.643	0.97018	111.4	114.5	119.1	4.29	0.8	1.85	10.51	2.24
	FALSE	High	[R].LRAETEQGEQQR.[Q]	0.0365253	0.00300596	4	25	4	CAA91196.1; XP_005251037.1; EAW82172.1; XP_011515432.1	CAA91196.1 [1855-1866]; XP_005251037.1 [1723-1734]; EAW82172.1 [1745-1756]; XP_011515432.1 [1723-1734]		1	1444.71	2.116	0.999517	80.1	99.2	118.5	39.92	46.02	15.51	30.59	40.48
	FALSE	High	[R].LREQLQLLEEQHR.[A]	6.76095e-05	1.93435e-05	3	25	5	CAA91196.1; XP_005251037.1; XP_011515432.1	CAA91196.1 [2731-2743]; XP_005251037.1 [2599-2611]; XP_011515432.1 [2599-2611]		1	1691.92	0.374	0.112721	52	78.6	307.6	14.31	14.7	7.41	60.2	11.53
	FALSE	High	[R].LRIEEEIR.[V]	0.0156676	0.00137497	4	25	16	CAA91196.1; XP_005251037.1; EAW82172.1; XP_011515432.1	CAA91196.1 [1585-1592]; XP_005251037.1 [1453-1460]; EAW82172.1 [1475-1482]; XP_011515432.1 [1453-1460]		1	1057.6	0.707	0.992443	120.7	111.1	147.7	17.7	29.61	27.7	23.28	7.4
	FALSE	High	[R].LRLPLDK.[E]	0.10294	0.00769842	4	26	4	CAA91196.1; XP_005251037.1; EAW82172.1; XP_011515432.1	CAA91196.1 [1144-1150]; XP_005251037.1 [1012-1018]; EAW82172.1 [1034-1040]; XP_011515432.1 [1012-1018]		1	854.546	1.49	0.941175	115.9	71.6	80.1	1.52	18.01	14.88	42.21	16.66
	FALSE	High	[R].LRLPLDKEPAR.[E]	2.89324e-06	1.93435e-05	4	26	23	CAA91196.1; XP_005251037.1; EAW82172.1; XP_011515432.1	CAA91196.1 [1144-1154]; XP_005251037.1 [1012-1022]; EAW82172.1 [1034-1044]; XP_011515432.1 [1012-1022]		2	1307.78	0.646	0.351817	79.3	143.3	118.4	24.47	10.87	21.04	50.46	36.13
	FALSE	High	[R].LSAEAEK.[V]	0.0672285	0.00497574	4	26	15	CAA91196.1; XP_005251037.1; EAW82172.1; XP_011515432.1	CAA91196.1 [1180-1186]; XP_005251037.1 [1048-1054]; EAW82172.1 [1070-1076]; XP_011515432.1 [1048-1054]		0	747.388	1.197	0.965725	94.7	114	57.2	5.98	15.64	6.71	19.62	6.64
	FALSE	High	[R].LSFSGLR.[AS]	0.0722648	0.00525446	3	25	25	CAA91196.1; XP_005251037.1; XP_011515432.1	CAA91196.1 [3440-3446]; XP_005251037.1 [3308-3314]; XP_011515432.1 [3308-3314]		0	779.441	0.818	0.973865	111.4	105.9	104.5	2.87	6.24	7.53	10.35	9.41
	FALSE	High	[K].LSIYNALK.[K]	0.00306154	0.00034628	3	25	11	CAA91196.1; XP_005251037.1; XP_011515432.1	CAA91196.1 [3175-3182]; XP_005251037.1 [3043-3050]; XP_011515432.1 [3043-3050]		0	921.54	100	6.09287e-17	139.4	3	182	3.47	19.92	8.91		10.18
	FALSE	High	[R].LSVAAQEAAR.[L]	5.99451e-05	1.93435e-05	4	26	28	CAA91196.1; XP_005251037.1; EAW82172.1; XP_011515432.1	CAA91196.1 [2420-2429]; XP_005251037.1 [2288-2297]; EAW82172.1 [2310-2319]; XP_011515432.1 [2288-2297]		0	1015.55	0.895	0.998657	115.2	110.6	83.8	11.72	5.94	7.8	3.71	11.45
	FALSE	High	[K].LSVYAALQR.[Q]	0.0598493	0.00462657	3	25	1	CAA91196.1; XP_005251037.1; XP_011515432.1	CAA91196.1 [2847-2855]; XP_005251037.1 [2715-2723]; XP_011515432.1 [2715-2723]		0	1020.58	100	6.09287e-17	196.1		55.4	16.22	42.03	21.67		17.56
	FALSE	High	[R].LSVYQAMK.[K]	0.0061931	0.00069399	3	26	15	CAA91196.1; XP_005251037.1; XP_011515432.1	CAA91196.1 [4084-4091]; XP_005251037.1 [3952-3959]; XP_011515432.1 [3952-3959]		0	939.497	0.968	0.781045	80.9	114.3	112.9	1.54	4.94	8.24	8.92	0.23
	FALSE	High	[R].LTVDEAVR.[AK]	0.00673302	0.000722819	3	26	30	CAA91196.1; XP_005251037.1; XP_011515432.1	CAA91196.1 [3213-3220]; [3879-3886]; XP_005251037.1 [3081-3088]; [3747-3754]; XP_011515432.1 [3081-3088]; [3747-3754]		0	902.494	0.936	0.940651	107.8	93.8	98.6	6.74	2.66	1.79	8.3	3.15
	FALSE	High	[RK].LTVEEAVR.[HM]	0.0108331	0.000986687	4	56	27	CAA91196.1; XP_005251037.1; XP_006710598.1; XP_011515432.1	CAA91196.1 [4122-4129]; XP_005251037.1 [3990-3997]; XP_006710598.1 [1779-1786]; XP_011515432.1 [3990-3997]		0	916.51	0.853	0.850012	135.1	95.9	99.7	12.28	1.6	6.15	14.21	3.6
	FALSE	High	[R].LTVNEAVK.[E]	0.00284656	0.000304168	3	25	14	CAA91196.1; XP_005251037.1; XP_011515432.1	CAA91196.1 [2885-2892]; XP_005251037.1 [2753-2760]; XP_011515432.1 [2753-2760]		0	873.504	1.362	0.403053	136.1	67.3	95	15.4	5.53	5.7	4.77	10.94
	FALSE	High	[R].LVASMEEAR.[R]	0.000650131	6.84312e-05	3	25	18	CAA91196.1; XP_005251037.1; XP_011515432.1	CAA91196.1 [2685-2693]; XP_005251037.1 [2553-2561]; XP_011515432.1 [2553-2561]		0	1005.5	1.095	0.82098	170.7	104.8	52.3	41.33	22.6	10.02	34.49	22.21
	FALSE	High	[R].LYVHEAVK.[A]	0.00303198	0.00034628	3	25	15	CAA91196.1; XP_005251037.1; XP_011515432.1	CAA91196.1 [3544-3551]; XP_005251037.1 [3412-3419]; XP_011515432.1 [3412-3419]		0	958.536	1.102	0.998309	88.3	96.2	123	28.88	22.17	17.77	19.01	14.47
	FALSE	High	[R].MGIVGPEFK.[D]	0.00817022	0.000772347	3	26	22	CAA91196.1; XP_005251037.1; XP_011515432.1	CAA91196.1 [4130-4138]; XP_005251037.1 [3998-4006]; XP_011515432.1 [3998-4006]		0	977.512	0.947	6.09287e-17	101	111.2	150.5	49.81	64.1		33.14	23.99
	FALSE	High	[K].MQAVQEATR.[L]	0.000926249	9.10162e-05	4	25	7	CAA91196.1; XP_005251037.1; EAW82172.1; XP_011515432.1	CAA91196.1 [2453-2461]; XP_005251037.1 [2321-2329]; EAW82172.1 [2343-2351]; XP_011515432.1 [2321-2329]		0	1033.51	0.88	6.09287e-17		146.2	126.7	13.53	23.51		4.29	2.29
	FALSE	High	[K].MQAVQEATR.[L]	0.00238935	0.000195525	4	25	5	CAA91196.1; XP_005251037.1; EAW82172.1; XP_011515432.1	CAA91196.1 [2453-2461]; XP_005251037.1 [2321-2329]; EAW82172.1 [2343-2351]; XP_011515432.1 [2321-2329]		0	1049.5	0.422	0.000879656	69.3	106.2	134.9	66.9	0.71	79.55	86.09	20.83
	FALSE	High	[K].MSAAQALK.[K]	0.0121796	0.00109357	3	26	18	CAA91196.1; XP_005251037.1; XP_011515432.1	CAA91196.1 [4505-4512]; XP_005251037.1 [4373-4380]; XP_011515432.1 [4373-4380]		0	819.439	0.803	0.941529	151	93.6	86.4	16.39	14.35	14.77	14.01	16.64
	FALSE	High	[R].MVEGYQGLR.[C]	0.000163769	4.2772e-05	4	26	33	CAA91196.1; XP_005251037.1; EAW82172.1; XP_011515432.1	CAA91196.1 [308-316]; XP_005251037.1 [176-184]; EAW82172.1 [198-206]; XP_011515432.1 [180-188]		0	1052.52	0.897	0.954296	102.5	97.9	132.9	9.19	4.29	5.02	18.55	6.11
	FALSE	High	[R].MVEGYQGLR.[C]	0.0111686	0.000986687	4	26	4	CAA91196.1; XP_005251037.1; EAW82172.1; XP_011515432.1	CAA91196.1 [308-316]; XP_005251037.1 [176-184]; EAW82172.1 [198-206]; XP_011515432.1 [180-188]		0	1068.51
	FALSE	High	[R].NDDIADGNPK.[L]	0.00271156	0.000282962	4	25	8	CAA91196.1; XP_005251037.1; EAW82172.1; XP_011515432.1	CAA91196.1 [259-268]; XP_005251037.1 [127-136]; EAW82172.1 [149-158]; XP_011515432.1 [131-140]		0	1058.47	0.01	6.09287e-17		293.8			132.57		17.47
	FALSE	High	[R].NLVDNITGQR.[L]	0.000295895	4.2772e-05	3	26	19	CAA91196.1; XP_005251037.1; XP_011515432.1	CAA91196.1 [4438-4447]; XP_005251037.1 [4306-4315]; XP_011515432.1 [4306-4315]		0	1129.6	0.78	0.994224	108.3	110.6	101.8	3.31	5.16	3	7.99	7.77
	FALSE	High	[K].QAADAEMEK.[H]	0.000992017	0.000139161	4	26	32	CAA91196.1; XP_005251037.1; EAW82172.1; XP_011515432.1	CAA91196.1 [2298-2306]; XP_005251037.1 [2166-2174]; EAW82172.1 [2188-2196]; XP_011515432.1 [2166-2174]		0	992.435	0.648	0.837349	96.1	114.7	107.1	45.54	34.14	19.16	14.03	17.23
	FALSE	High	[K].QAEEIGEK.[L]	0.00625417	0.000710402	4	25	18	CAA91196.1; XP_005251037.1; EAW82172.1; XP_011515432.1	CAA91196.1 [2546-2553]; XP_005251037.1 [2414-2421]; EAW82172.1 [2436-2443]; XP_011515432.1 [2414-2421]		0	903.442	0.747	0.984003	132.3	108.7	92.8	10.45	7.03	11.03	26.23	26.99
	FALSE	High	[R].QAEVELASR.[V]	0.0112828	0.00100559	4	25	7	CAA91196.1; XP_005251037.1; EAW82172.1; XP_011515432.1	CAA91196.1 [1649-1657]; XP_005251037.1 [1517-1525]; EAW82172.1 [1539-1547]; XP_011515432.1 [1517-1525]		0	985.495	2.47	0.990868	74.3	82.9	40.9	56.46	57.23	14.49	32.81	10.09
	FALSE	High	[R].QAEVELASR.[V]	0.000659817	9.10162e-05	4	25	16	CAA91196.1; XP_005251037.1; EAW82172.1; XP_011515432.1	CAA91196.1 [1649-1657]; XP_005251037.1 [1517-1525]; EAW82172.1 [1539-1547]; XP_011515432.1 [1517-1525]		0	1002.52	1.059	0.17461	181.8	62.2	78.5	15.93	9.41	8.01	5.53	10.38
	FALSE	High	[R].QALHSLELHYQAFLR.[D]	2.45261e-05	1.93435e-05	4	26	3	CAA91196.1; XP_005251037.1; EAW82172.1; XP_011515432.1	CAA91196.1 [1061-1075]; XP_005251037.1 [929-943]; EAW82172.1 [951-965]; XP_011515432.1 [929-943]		0	1808.94	0.75	0.376247	177.8	79	63.3	17.1	25.28	3.95	20.62	7.58
	FALSE	High	[K].QEELQQLEQQR.[R]	0.000146765	4.2772e-05	3	25	2	CAA91196.1; XP_005251037.1; XP_011515432.1	CAA91196.1 [2707-2717]; XP_005251037.1 [2575-2585]; XP_011515432.1 [2575-2585]		0	1411.68	0.759	0.383803	76.5	142.4	124.2	33.81	0.83	4.91	77.31	7.3
	FALSE	High	[K].QEELQQLEQQR.[R]	6.96664e-07	1.93435e-05	3	25	11	CAA91196.1; XP_005251037.1; XP_011515432.1	CAA91196.1 [2707-2717]; XP_005251037.1 [2575-2585]; XP_011515432.1 [2575-2585]		0	1428.71	0.958	0.985512	126.3	100.1	65	8.43	11.43	3.09	15.76	41.31
	FALSE	High	[R].QELEAELAK.[V]	0.00098717	0.000139161	4	25	10	CAA91196.1; XP_005251037.1; EAW82172.1; XP_011515432.1	CAA91196.1 [1888-1896]; XP_005251037.1 [1756-1764]; EAW82172.1 [1778-1786]; XP_011515432.1 [1756-1764]		0	1030.54	0.97	0.740194	143.5	80.8	91.2	6.63	2.68	3.25	9.12	4.95
	FALSE	High	[R].QEQALLEEIER.[H]	4.83141e-05	1.93435e-05	4	26	13	CAA91196.1; XP_005251037.1; EAW82172.1; XP_011515432.1	CAA91196.1 [1387-1397]; XP_005251037.1 [1255-1265]; EAW82172.1 [1277-1287]; XP_011515432.1 [1255-1265]		0	1340.67	0.939	0.950447	126.3	102.3	76.5	13.32	12.04	6.32	4.15	8.74
	FALSE	High	[R].QEQALLEEIER.[H]	8.02058e-07	1.93435e-05	4	26	10	CAA91196.1; XP_005251037.1; EAW82172.1; XP_011515432.1	CAA91196.1 [1387-1397]; XP_005251037.1 [1255-1265]; EAW82172.1 [1277-1287]; XP_011515432.1 [1255-1265]		0	1357.7	1.222	0.940227	115.2	82.9	80.3	17.31	1.57	6.24	6.77	5.12
	FALSE	High	[R].QEQIQAMPLADSQAVR.[E]	1.19676e-10	1.93435e-05	4	26	21	CAA91196.1; XP_005251037.1; EAW82172.1; XP_011515432.1	CAA91196.1 [1367-1382]; XP_005251037.1 [1235-1250]; EAW82172.1 [1257-1272]; XP_011515432.1 [1235-1250]		0	1784.9	0.94	0.46019	161	80.3	75.3	11.79	6.37	4.94	20.84	0.34
	FALSE	High	[R].QHEAEEGVR.[R]	0.000297367	4.2772e-05	3	25	19	CAA91196.1; XP_005251037.1; XP_011515432.1	CAA91196.1 [2696-2704]; XP_005251037.1 [2564-2572]; XP_011515432.1 [2564-2572]		0	1037.46	0.928	0.964536	112	121.7	87.4	13.96	33.14	24.63	38.23	34.14
	FALSE	High	[R].QHEAEEGVR.[R]	0.0232891	0.00177699	3	25	4	CAA91196.1; XP_005251037.1; XP_011515432.1	CAA91196.1 [2696-2704]; XP_005251037.1 [2564-2572]; XP_011515432.1 [2564-2572]		0	1054.49	4.996	4.77377e-05	174.6	28	97	8.25	48.45	31.87	48.32	42.71
	FALSE	High	[R].QLAAEEER.[R]	0.0395783	0.00326561	4	26	6	CAA91196.1; XP_005251037.1; EAW82172.1; XP_011515432.1	CAA91196.1 [2111-2118]; XP_005251037.1 [1979-1986]; EAW82172.1 [2001-2008]; XP_011515432.1 [1979-1986]		0	928.437	1.355	0.951062	75.4	80.8	182.9	20.5	19.99	0.31	26.66	28.55
	FALSE	High	[R].QLAAEEER.[R]	0.0105617	0.000951775	4	26	22	CAA91196.1; XP_005251037.1; EAW82172.1; XP_011515432.1	CAA91196.1 [2111-2118]; XP_005251037.1 [1979-1986]; EAW82172.1 [2001-2008]; XP_011515432.1 [1979-1986]		0	945.464	1.213	0.97439	112.7	118.4	86.2	17.52	28.43	23.74	22.65	22.18
	FALSE	High	[R].QLAEAHAQAK.[A]	6.46272e-05	1.93435e-05	4	25	8	CAA91196.1; XP_005251037.1; EAW82172.1; XP_011515432.1	CAA91196.1 [1511-1520]; XP_005251037.1 [1379-1388]; EAW82172.1 [1401-1410]; XP_011515432.1 [1379-1388]		0	1049.54	0.01	0.997694	112	101	103.5		20.31	4.92	15.49	14.59
	FALSE	High	[R].QLAEAHAQAK.[A]	5.39525e-05	1.93435e-05	4	25	46	CAA91196.1; XP_005251037.1; EAW82172.1; XP_011515432.1	CAA91196.1 [1511-1520]; XP_005251037.1 [1379-1388]; EAW82172.1 [1401-1410]; XP_011515432.1 [1379-1388]		0	1066.56	0.632	0.981819	105.7	95.9	114.8	1.08	25.38	4.46	32.1	9.73
	FALSE	High	[R].QLAEEDAAR.[Q]	0.00592592	0.000634693	4	26	8	CAA91196.1; XP_005251037.1; EAW82172.1; XP_011515432.1	CAA91196.1 [1955-1963]; XP_005251037.1 [1823-1831]; EAW82172.1 [1845-1853]; XP_011515432.1 [1823-1831]		0	985.459	1.046	0.742346	135.4	75	101.8	10.9	8.2	8.55	25.43	7.19
	FALSE	High	[R].QLAEEDAAR.[Q]	0.000446542	4.2772e-05	4	26	26	CAA91196.1; XP_005251037.1; EAW82172.1; XP_011515432.1	CAA91196.1 [1955-1963]; XP_005251037.1 [1823-1831]; EAW82172.1 [1845-1853]; XP_011515432.1 [1823-1831]		0	1002.49	1.048	0.978903	110.4	90.9	107.6	13.91	15.11	10.37	3.28	5.49
	FALSE	High	[R].QLAEEDLAQQR.[A]	9.8919e-05	1.93435e-05	4	26	8	CAA91196.1; XP_005251037.1; EAW82172.1; XP_011515432.1	CAA91196.1 [2432-2442]; XP_005251037.1 [2300-2310]; EAW82172.1 [2322-2332]; XP_011515432.1 [2300-2310]		0	1283.62	1.108	0.869204	114.3	93	105.2	9.89	6.95	9.3	3.94	5.49
	FALSE	High	[R].QLAEEDLAQQR.[A]	2.01405e-06	1.93435e-05	4	26	41	CAA91196.1; XP_005251037.1; EAW82172.1; XP_011515432.1	CAA91196.1 [2432-2442]; XP_005251037.1 [2300-2310]; EAW82172.1 [2322-2332]; XP_011515432.1 [2300-2310]		0	1300.65	0.895	0.811516	89	110.8	106.4	6.32	4.95	6.67	5.55	3.62
	FALSE	High	[R].QLAEGTAQQR.[L]	0.00183625	0.000154191	4	25	11	CAA91196.1; XP_005251037.1; EAW82172.1; XP_011515432.1	CAA91196.1 [1836-1845]; XP_005251037.1 [1704-1713]; EAW82172.1 [1726-1735]; XP_011515432.1 [1704-1713]		0	1084.54	0.656	0.980806	123.1	110.4	95.5	19.9	36.6	2.74	20.24	13.92
	FALSE	High	[R].QLAEGTAQQR.[L]	3.10587e-05	1.93435e-05	4	25	37	CAA91196.1; XP_005251037.1; EAW82172.1; XP_011515432.1	CAA91196.1 [1836-1845]; XP_005251037.1 [1704-1713]; EAW82172.1 [1726-1735]; XP_011515432.1 [1704-1713]		0	1101.56	0.833	0.998309	112	105.3	102.6	11.2	13.46	6.59	27.48	27.13
	FALSE	High	[R].QLEMSAEAER.[L]	0.00258287	0.000217647	4	25	2	CAA91196.1; XP_005251037.1; EAW82172.1; XP_011515432.1	CAA91196.1 [2512-2521]; XP_005251037.1 [2380-2389]; EAW82172.1 [2402-2411]; XP_011515432.1 [2380-2389]		0	1146.51	0.784	0.981348	116.6	105.5	103.5	14.26	2.14	6.19	2.13	5.65
	FALSE	Medium	[R].QLEMSAEAER.[L]	0.407477	0.0320978	4	25	1	CAA91196.1; XP_005251037.1; EAW82172.1; XP_011515432.1	CAA91196.1 [2512-2521]; XP_005251037.1 [2380-2389]; EAW82172.1 [2402-2411]; XP_011515432.1 [2380-2389]		0	1162.5
	FALSE	High	[R].QLEMSAEAER.[L]	7.21607e-05	1.93435e-05	4	25	17	CAA91196.1; XP_005251037.1; EAW82172.1; XP_011515432.1	CAA91196.1 [2512-2521]; XP_005251037.1 [2380-2389]; EAW82172.1 [2402-2411]; XP_011515432.1 [2380-2389]		0	1163.54	0.787	0.91885	101.4	114.9	109.4	22.03	7.29	4.32	8.94	4.97
	FALSE	High	[R].QLEMSAEAER.[L]	0.000693142	9.10162e-05	4	25	4	CAA91196.1; XP_005251037.1; EAW82172.1; XP_011515432.1	CAA91196.1 [2512-2521]; XP_005251037.1 [2380-2389]; EAW82172.1 [2402-2411]; XP_011515432.1 [2380-2389]		0	1179.53		6.09287e-17	156.5		132.8			26.64		51.74
	FALSE	High	[R].QLLEEELAR.[L]	0.00179197	0.000154191	4	25	7	CAA91196.1; XP_005251037.1; EAW82172.1; XP_011515432.1	CAA91196.1 [1867-1875]; XP_005251037.1 [1735-1743]; EAW82172.1 [1757-1765]; XP_011515432.1 [1735-1743]		0	1083.57	0.731	0.946542	139.8	137.5	6.1	49.32	44.59	75.22	13.44	153.75
	FALSE	High	[R].QLLEEELAR.[L]	0.000338314	4.2772e-05	4	25	8	CAA91196.1; XP_005251037.1; EAW82172.1; XP_011515432.1	CAA91196.1 [1867-1875]; XP_005251037.1 [1735-1743]; EAW82172.1 [1757-1765]; XP_011515432.1 [1735-1743]		0	1100.59	0.936	0.965443	119.2	100	96.6	4.95	6.53	4.81	13.14	5.29
	FALSE	High	[R].QLLSPGTALILLEAQAASGFLLDPVR.[N]	9.92146e-09	1.93435e-05	3	25	15	CAA91196.1; XP_005251037.1; XP_011515432.1	CAA91196.1 [2856-2881]; XP_005251037.1 [2724-2749]; XP_011515432.1 [2724-2749]		0	2676.5	0.069	0.824317	154.9	97.4	109.5		36.37	34.76	22.89	9.24
	FALSE	High	[R].QLLSPGTALILLEAQAASGFLLDPVR.[N]	4.72429e-13	1.93435e-05	3	25	10	CAA91196.1; XP_005251037.1; XP_011515432.1	CAA91196.1 [2856-2881]; XP_005251037.1 [2724-2749]; XP_011515432.1 [2724-2749]		0	2693.52	0.01	0.333259	109.3	169.3	122.3		71.15	52.8	53.51	70.34
	FALSE	High	[R].QLQLAQEAAQK.[R]	1.4911e-05	1.93435e-05	4	26	13	CAA91196.1; XP_005251037.1; EAW82172.1; XP_011515432.1	CAA91196.1 [2172-2182]; XP_005251037.1 [2040-2050]; EAW82172.1 [2062-2072]; XP_011515432.1 [2040-2050]		0	1227.67	0.686	0.770481	156.7	86.3	103.6	10.63	8.23	10.72	6.58	13.69
	FALSE	High	[K].QITMEELVR.[S]	0.00158606	0.000154191	3	26	6	CAA91196.1; XP_005251037.1; XP_011515432.1	CAA91196.1 [4028-4036]; XP_005251037.1 [3896-3904]; XP_011515432.1 [3896-3904]		0	1101.56	0.934	0.963403	127.7	98.8	93.6	7.93	9.12	7.12	10.65	5.82
	FALSE	High	[K].QITMEELVR.[S]	0.000323542	4.2772e-05	3	26	15	CAA91196.1; XP_005251037.1; XP_011515432.1	CAA91196.1 [4028-4036]; XP_005251037.1 [3896-3904]; XP_011515432.1 [3896-3904]		0	1118.59	0.948	0.88519	133.2	94.4	87.4	17.13	7.61	4.3	11.81	13.18
	FALSE	High	[R].QQEELLAEENQR.[L]	2.23848e-06	1.93435e-05	3	25	5	CAA91196.1; XP_005251037.1; XP_011515432.1	CAA91196.1 [2719-2730]; XP_005251037.1 [2587-2598]; XP_011515432.1 [2587-2598]		0	1469.69	3.873	1.9445e-06	204.5	25.5	88.3	65.25	10.85	12.27	45.03
	FALSE	High	[R].QQEELLAEENQR.[L]	5.68623e-08	1.93435e-05	3	25	33	CAA91196.1; XP_005251037.1; XP_011515432.1	CAA91196.1 [2719-2730]; XP_005251037.1 [2587-2598]; XP_011515432.1 [2587-2598]		0	1486.71	0.856	0.92891	128.8	93.7	93.3	11.83	15.11	4.84	6.36	6.07
	FALSE	High	[R].QQGLASYDYVR.[R]	0.00455546	0.000502794	3	26	4	CAA91196.1; XP_005251037.1; XP_011515432.1	CAA91196.1 [3771-3781]; XP_005251037.1 [3639-3649]; XP_011515432.1 [3639-3649]		0	1282.61	2.123	0.48864	112	89.8	141.1	54.68	9.75	12.24	79.82	12.44
	FALSE	High	[R].QQGLASYDYVR.[R]	6.21537e-06	1.93435e-05	3	26	15	CAA91196.1; XP_005251037.1; XP_011515432.1	CAA91196.1 [3771-3781]; XP_005251037.1 [3639-3649]; XP_011515432.1 [3639-3649]		0	1299.63	0.763	0.960442	125.5	100.8	108.5	4.41	0.99	3.69	11.01	3.47
	FALSE	High	[R].QQQQMEQER.[Q]	0.00226469	0.000195525	3	25	10	CAA91196.1; XP_005251037.1; XP_011515432.1	CAA91196.1 [2674-2682]; XP_005251037.1 [2542-2550]; XP_011515432.1 [2542-2550]		0	1187.51	1.729	0.556437	137.3	62.6	79.1	12.79	7.17	7.8	26.14	6.36
	FALSE	High	[R].QQQQMEQER.[Q]	0.00029443	4.2772e-05	3	25	36	CAA91196.1; XP_005251037.1; XP_011515432.1	CAA91196.1 [2674-2682]; XP_005251037.1 [2542-2550]; XP_011515432.1 [2542-2550]		0	1204.54	0.71	0.993552	109.4	104.4	103.2	5.71	23.17	20.66	1.23	6.41
	FALSE	High	[R].QRELAEQELEK.[Q]	0.129764	0.00940438	4	25	1	CAA91196.1; XP_005251037.1; EAW82172.1; XP_011515432.1	CAA91196.1 [1823-1833]; XP_005251037.1 [1691-1701]; EAW82172.1 [1713-1723]; XP_011515432.1 [1691-1701]		1	1372.71
	FALSE	High	[K].QRLEAEAGR.[F]	0.00286042	0.000304168	4	26	8	CAA91196.1; XP_005251037.1; EAW82172.1; XP_011515432.1	CAA91196.1 [1924-1932]; XP_005251037.1 [1792-1800]; EAW82172.1 [1814-1822]; XP_011515432.1 [1792-1800]		1	1029.54	0.611	0.230848	64.9	137.1	169.3	35.44	43.67	12.79	6.73	52.57
	FALSE	High	[K].QSAEEQAQAR.[A]	0.0011545	0.000154191	4	26	6	CAA91196.1; XP_005251037.1; EAW82172.1; XP_011515432.1	CAA91196.1 [2256-2265]; XP_005251037.1 [2124-2133]; EAW82172.1 [2146-2155]; XP_011515432.1 [2124-2133]		0	1100.5	1.05	0.881613	132.4	112.4	67.7	73.88	31.21	10.29	37.68
	FALSE	High	[K].QSAEEQAQAR.[A]	2.56608e-05	1.93435e-05	4	26	32	CAA91196.1; XP_005251037.1; EAW82172.1; XP_011515432.1	CAA91196.1 [2256-2265]; XP_005251037.1 [2124-2133]; EAW82172.1 [2146-2155]; XP_011515432.1 [2124-2133]		0	1117.52	0.463	0.659287	104.1	141.5	69.1	3.44	30.87	17.03	34.43	11.2
	FALSE	High	[R].QSSEAEIQAK.[A]	0.00207444	0.000195525	4	25	4	CAA91196.1; XP_005251037.1; EAW82172.1; XP_011515432.1	CAA91196.1 [1564-1573]; XP_005251037.1 [1432-1441]; EAW82172.1 [1454-1463]; XP_011515432.1 [1432-1441]		0	1073.51	1.267	0.948146	114.1	84.2	101.2	14.38	23.59	11.84	65.86	20.94
	FALSE	High	[R].QSSEAEIQAK.[A]	0.000118421	1.93435e-05	4	25	28	CAA91196.1; XP_005251037.1; EAW82172.1; XP_011515432.1	CAA91196.1 [1564-1573]; XP_005251037.1 [1432-1441]; EAW82172.1 [1454-1463]; XP_011515432.1 [1432-1441]		0	1090.54	1.109	0.984003	109.2	124.9	92.4	19.47	26.26	25.1	20.37	21.85
	FALSE	High	[R].QTLSIYQALK.[K]	0.000320347	4.2772e-05	3	26	9	CAA91196.1; XP_005251037.1; XP_011515432.1	CAA91196.1 [3839-3848]; XP_005251037.1 [3707-3716]; XP_011515432.1 [3707-3716]		0	1164.66	0.657	0.937562	134.2	97.8	105.8	15.84	3.51	13.56	4.17	6.37
	FALSE	High	[R].QTNLENLDQAFSVAER.[D]	3.11882e-09	1.93435e-05	4	26	4	CAA91196.1; XP_005251037.1; EAW82172.1; XP_011515432.1	CAA91196.1 [350-365]; XP_005251037.1 [218-233]; EAW82172.1 [240-255]; XP_011515432.1 [222-237]		0	1817.87
	FALSE	High	[R].QTNLENLDQAFSVAER.[D]	4.76568e-11	1.93435e-05	4	26	19	CAA91196.1; XP_005251037.1; EAW82172.1; XP_011515432.1	CAA91196.1 [350-365]; XP_005251037.1 [218-233]; EAW82172.1 [240-255]; XP_011515432.1 [222-237]		0	1834.89	0.942	0.853726	138.4	89.5	79.4	3.25	4.1	5.2	6.64	4.95
	FALSE	High	[K].QVAEEAAR.[L]	0.129764	0.00940438	4	26	4	CAA91196.1; XP_005251037.1; EAW82172.1; XP_011515432.1	CAA91196.1 [2412-2419]; XP_005251037.1 [2280-2287]; EAW82172.1 [2302-2309]; XP_011515432.1 [2280-2287]		0	856.416	1.436	0.753803	136.7	75.2	100.4	3.47	4.75	11.36	1.82	0.85
	FALSE	High	[K].QVAEEAAR.[L]	0.0120558	0.00109357	4	26	33	CAA91196.1; XP_005251037.1; EAW82172.1; XP_011515432.1	CAA91196.1 [2412-2419]; XP_005251037.1 [2280-2287]; EAW82172.1 [2302-2309]; XP_011515432.1 [2280-2287]		0	873.442	0.701	0.761937	100	126.7	90.5	6.04	11.97	7.85	23.45	16.06
	FALSE	High	[R].QVEEEILALK.[A]	5.5046e-05	1.93435e-05	4	26	12	CAA91196.1; XP_005251037.1; EAW82172.1; XP_011515432.1	CAA91196.1 [2059-2068]; XP_005251037.1 [1927-1936]; EAW82172.1 [1949-1958]; XP_011515432.1 [1927-1936]		0	1154.63	0.812	0.973883	141.9	145.7		8.96	2.07	0.7	2.54
	FALSE	High	[R].QVEEEILALK.[A]	0.00572646	0.000615159	4	26	1	CAA91196.1; XP_005251037.1; EAW82172.1; XP_011515432.1	CAA91196.1 [2059-2068]; XP_005251037.1 [1927-1936]; EAW82172.1 [1949-1958]; XP_011515432.1 [1927-1936]		0	1171.66	0.972	0.989403	106.3	108.3	77.9	4.68	2.21	2.45	8.24	6.71
	FALSE	High	[K].QVEVTVHK.[G]	0.0184013	0.00154512	4	26	9	CAA91196.1; XP_005251037.1; EAW82172.1; XP_011515432.1	CAA91196.1 [954-961]; XP_005251037.1 [822-829]; EAW82172.1 [844-851]; XP_011515432.1 [822-829]		0	922.499	1.357	6.09287e-17		115.3	56.8	7.2	10.32		34.13	17.71
	FALSE	High	[K].QVEVTVHK.[G]	0.00663423	0.000722819	4	26	11	CAA91196.1; XP_005251037.1; EAW82172.1; XP_011515432.1	CAA91196.1 [954-961]; XP_005251037.1 [822-829]; EAW82172.1 [844-851]; XP_011515432.1 [822-829]		0	939.526	1.199	0.980751	145.4	93.3	45.1	7.98	17.18	15.25	49.82	16.33
	FALSE	High	[K].QVEVTVHKGDECQLVGPAQPSHWK.[V]	5.67575e-09	1.93435e-05	4	26	5	CAA91196.1; XP_005251037.1; EAW82172.1; XP_011515432.1	CAA91196.1 [954-977]; XP_005251037.1 [822-845]; EAW82172.1 [844-867]; XP_011515432.1 [822-845]		1	2713.3	0.385	0.982219	135.9	111.8	137.9	15.33	27.94	18.78	22.75	10.51
	FALSE	High	[K].QVEVTVHKGDECQLVGPAQPSHWK.[V]	3.8071e-10	1.93435e-05	4	26	5	CAA91196.1; XP_005251037.1; EAW82172.1; XP_011515432.1	CAA91196.1 [954-977]; XP_005251037.1 [822-845]; EAW82172.1 [844-867]; XP_011515432.1 [822-845]		1	2730.33	0.217	0.992531	30.1	83.7	39		18.43	11.81	114.31	31.84
	FALSE	High	[R].QVQDESQR.[K]	0.0776816	0.00575757	4	25	2	CAA91196.1; XP_005251037.1; EAW82172.1; XP_011515432.1	CAA91196.1 [1639-1646]; XP_005251037.1 [1507-1514]; EAW82172.1 [1529-1536]; XP_011515432.1 [1507-1514]		0	972.438	0.988	0.983939	150.7	128.9		15.97	12.64	7.14	3.61
	FALSE	High	[R].QVQVALETAQR.[S]	0.00833516	0.000772347	4	25	1	CAA91196.1; XP_005251037.1; EAW82172.1; XP_011515432.1	CAA91196.1 [1699-1709]; XP_005251037.1 [1567-1577]; EAW82172.1 [1589-1599]; XP_011515432.1 [1567-1577]		0	1225.65	0.66	6.09287e-17	50.3	127	131.3	26.12	28		14.94
	FALSE	High	[R].QVQVALETAQR.[S]	1.58992e-06	1.93435e-05	4	25	22	CAA91196.1; XP_005251037.1; EAW82172.1; XP_011515432.1	CAA91196.1 [1699-1709]; XP_005251037.1 [1567-1577]; EAW82172.1 [1589-1599]; XP_011515432.1 [1567-1577]		0	1242.68	0.851	0.741019	154.2	76.1	101.8	13.97	9.05	9.18	11.03	4.6
	FALSE	High	[R].QYDIDDAIAK.[N]	0.000787731	9.10162e-05	3	26	6	CAA91196.1; XP_005251037.1; XP_011515432.1	CAA91196.1 [4339-4348]; XP_005251037.1 [4207-4216]; XP_011515432.1 [4207-4216]		0	1134.53	0.722	0.991475	116	116.7	101.9	9.66	7.99	2.48	9.83	4.73
	FALSE	High	[R].QYDIDDAIAK.[N]	0.000184552	4.2772e-05	3	26	16	CAA91196.1; XP_005251037.1; XP_011515432.1	CAA91196.1 [4339-4348]; XP_005251037.1 [4207-4216]; XP_011515432.1 [4207-4216]		0	1151.56	0.768	0.98585	114.3	109.3	99	9.41	4.75	5.65	8.02	3.54
	FALSE	High	[R].RAAEEAEEAR.[V]	0.00106239	0.000139161	4	26	2	CAA91196.1; XP_005251037.1; EAW82172.1; XP_011515432.1	CAA91196.1 [2225-2234]; XP_005251037.1 [2093-2102]; EAW82172.1 [2115-2124]; XP_011515432.1 [2093-2102]		1	1131.54		6.09287e-17	114.5		385.5			9.7		14.6
	FALSE	High	[R].REEAAVDAQQQK.[R]	4.21015e-10	1.93435e-05	4	25	51	CAA91196.1; XP_005251037.1; EAW82172.1; XP_011515432.1	CAA91196.1 [1541-1552]; XP_005251037.1 [1409-1420]; EAW82172.1 [1431-1442]; XP_011515432.1 [1409-1420]		1	1372.68	0.81	0.800919	101	117	95.2	19.59	20.54	10.43	19.18	5.43
	FALSE	High	[R].RFPSSFEEIEILWSQFLK.[F]	1.16703e-10	1.93435e-05	4	26	4	CAA91196.1; XP_005251037.1; EAW82172.1; XP_011515432.1	CAA91196.1 [443-460]; XP_005251037.1 [311-328]; EAW82172.1 [333-350]; XP_011515432.1 [311-328]		1	2256.17	0.01	0.158447	86	193.7	93.3		36.87	45.98	28.31	78.26
	FALSE	High	[R].RKQEELQQLEQQR.[R]	5.44965e-05	1.93435e-05	3	25	5	CAA91196.1; XP_005251037.1; XP_011515432.1	CAA91196.1 [2705-2717]; XP_005251037.1 [2573-2585]; XP_011515432.1 [2573-2585]		2	1712.9	0.01	6.09287e-17		143.6	356.4				44.89	14.17
	FALSE	High	[R].RLAEDEAFQR.[R]	0.0455314	0.00364	4	26	3	CAA91196.1; XP_005251037.1; EAW82172.1; XP_011515432.1	CAA91196.1 [2005-2014]; XP_005251037.1 [1873-1882]; EAW82172.1 [1895-1904]; XP_011515432.1 [1873-1882]		1	1234.62		6.09287e-17	41.6		458.4					12.33
	FALSE	Medium	[R].RLEEQAAQHK.[A]	0.370543	0.0279464	4	26	1	CAA91196.1; XP_005251037.1; EAW82172.1; XP_011515432.1	CAA91196.1 [2016-2025]; XP_005251037.1 [1884-1893]; EAW82172.1 [1906-1915]; XP_011515432.1 [1884-1893]		1	1209.63
	FALSE	High	[R].RPELEDSTLR.[Y]	6.42779e-07	1.93435e-05	4	26	31	CAA91196.1; XP_005251037.1; EAW82172.1; XP_011515432.1	CAA91196.1 [651-660]; XP_005251037.1 [519-528]; EAW82172.1 [541-550]; XP_011515432.1 [519-528]		0	1215.63	1.231	0.659628	131.2	90.3	91.8	28.57	6.62	9.97	23.71	19.59
	FALSE	High	[K].RQELEAELAK.[V]	4.11456e-06	1.93435e-05	4	25	31	CAA91196.1; XP_005251037.1; EAW82172.1; XP_011515432.1	CAA91196.1 [1887-1896]; XP_005251037.1 [1755-1764]; EAW82172.1 [1777-1786]; XP_011515432.1 [1755-1764]		1	1186.64	0.732	0.96677	96.6	109.6	140.3	25	17.7	10.69	25.09	21.16
	FALSE	High	[R].RQEQIQAMPLADSQAVR.[E]	1.86432e-07	1.93435e-05	4	26	6	CAA91196.1; XP_005251037.1; EAW82172.1; XP_011515432.1	CAA91196.1 [1366-1382]; XP_005251037.1 [1234-1250]; EAW82172.1 [1256-1272]; XP_011515432.1 [1234-1250]		1	1941	0.771	0.995444	101.6	93.4	150.3	3.99	4.98	11.59	28.3	3.04
	FALSE	High	[R].RQQEELLAEENQR.[L]	2.14242e-08	1.93435e-05	3	25	17	CAA91196.1; XP_005251037.1; XP_011515432.1	CAA91196.1 [2718-2730]; XP_005251037.1 [2586-2598]; XP_011515432.1 [2586-2598]		1	1642.81	0.731	0.00304235	41.4	134	172.6	23.87	22.89	69.33	73.63	8.11
	FALSE	High	[R].RQVEEEILALK.[A]	0.00519418	0.000557966	4	26	8	CAA91196.1; XP_005251037.1; EAW82172.1; XP_011515432.1	CAA91196.1 [2058-2068]; XP_005251037.1 [1926-1936]; EAW82172.1 [1948-1958]; XP_011515432.1 [1926-1936]		1	1327.76	0.749	0.610449	79.3	108	156.3	8.19		0.11	13.08	2.49
	FALSE	High	[R].RVVIVDPETGK.[E]	0.0958592	0.00709237	3	26	2	CAA91196.1; XP_005251037.1; XP_011515432.1	CAA91196.1 [4277-4287]; XP_005251037.1 [4145-4155]; XP_011515432.1 [4145-4155]		1	1212.69	0.769	6.09287e-17	24.6	144.1	150.3	14.46	14.61		10.7	12.47
	FALSE	High	[R].RYASGSSASLGGPESAVA.[-]	3.97243e-05	1.93435e-05	3	26	11	CAA91196.1; XP_005251037.1; XP_011515432.1	CAA91196.1 [4667-4684]; XP_005251037.1 [4535-4552]; XP_011515432.1 [4535-4552]		1	1666.8	0.825	0.80271	63.8	102.1	167.7	8.89	22.56	17.13	20.39	4.28
	FALSE	High	[R].SAEAELQSK.[R]	0.000422864	4.2772e-05	4	25	20	CAA91196.1; XP_005251037.1; EAW82172.1; XP_011515432.1	CAA91196.1 [1710-1718]; XP_005251037.1 [1578-1586]; EAW82172.1 [1600-1608]; XP_011515432.1 [1578-1586]		0	962.479	0.98	0.9741	108.1	96.8	99.6	7.89	15.14	11.57	34.58	10.44
	FALSE	High	[R].SDEGQLSPATR.[G]	2.50048e-06	1.93435e-05	4	26	29	CAA91196.1; XP_005251037.1; EAW82172.1; XP_011515432.1	CAA91196.1 [714-724]; XP_005251037.1 [582-592]; EAW82172.1 [604-614]; XP_011515432.1 [582-592]		0	1160.55	1.033	0.736595	130.5	87.1	100.7	11.97	11.57	3.79	8.37	6.08
	FALSE	High	[K].SEEMQTVQQEQLLQETQALQQSFLSEK.[D]	1.5892e-09	1.93435e-05	3	23	8	CAA91196.1; XP_005251037.1; XP_011515432.1	CAA91196.1 [2610-2636]; XP_005251037.1 [2478-2504]; XP_011515432.1 [2478-2504]		0	3180.54	0.01	0.917275	138.1	158.1	96		54.61	66.12	34.83	72.41
	FALSE	High	[K].SEEMQTVQQEQLLQETQALQQSFLSEK.[D]	2.23341e-10	1.93435e-05	3	23	11	CAA91196.1; XP_005251037.1; XP_011515432.1	CAA91196.1 [2610-2636]; XP_005251037.1 [2478-2504]; XP_011515432.1 [2478-2504]		0	3196.53	2.193	0.538685	160.7	49.4	53.8	9.75	36.6	32.26	49.37	77.92
	FALSE	High	[R].SELELTLGK.[L]	0.00163322	0.000154191	4	26	14	CAA91196.1; XP_005251037.1; EAW82172.1; XP_011515432.1	CAA91196.1 [1202-1210]; XP_005251037.1 [1070-1078]; EAW82172.1 [1092-1100]; XP_011515432.1 [1070-1078]		0	989.551	0.759	0.989372	105.1	117.8	106.2	7.54	7.6	12.61	26.43	6.52
	FALSE	High	[R].SKEQAELEAAR.[Q]	4.75922e-05	1.93435e-05	4	26	46	CAA91196.1; XP_005251037.1; EAW82172.1; XP_011515432.1	CAA91196.1 [2098-2108]; XP_005251037.1 [1966-1976]; EAW82172.1 [1988-1998]; XP_011515432.1 [1966-1976]		1	1231.63	0.772	0.945216	128.9	101.6	109.6	15.02	5.88	21.5	23.02	7.14
	FALSE	High	[K].SLAAEEEAAR.[Q]	0.000100918	1.93435e-05	4	26	44	CAA91196.1; XP_005251037.1; EAW82172.1; XP_011515432.1	CAA91196.1 [2130-2139]; XP_005251037.1 [1998-2007]; EAW82172.1 [2020-2029]; XP_011515432.1 [1998-2007]		0	1046.51	1.378	0.184936	159.1	66.7	75.6	25.52	20.28	9.06	12.09	5.93
	FALSE	High	[K].SLAQAEAEK.[Q]	0.0034393	0.000427246	4	25	14	CAA91196.1; XP_005251037.1; EAW82172.1; XP_011515432.1	CAA91196.1 [1793-1801]; XP_005251037.1 [1661-1669]; EAW82172.1 [1683-1691]; XP_011515432.1 [1661-1669]		0	946.484	1.176	0.840351	120.5	93.8	99.4	10.17	13.71	10.81	9.19	11.57
	FALSE	High	[R].SLESLHSFVAAATK.[E]	1.4305e-06	1.93435e-05	4	26	15	CAA91196.1; XP_005251037.1; EAW82172.1; XP_011515432.1	CAA91196.1 [751-764]; XP_005251037.1 [619-632]; EAW82172.1 [641-654]; XP_011515432.1 [619-632]		0	1460.77	0.776	0.996148	123.8	98.5	109.8	4.52	1.34	5.76	5.37	3.31
	FALSE	High	[R].SLHPHVPGVTNLQVMR.[A]	1.10275e-05	1.93435e-05	1	4	2	CAA91196.1	CAA91196.1 [35-50]		0	1784.96
	FALSE	High	[K].SLLAWQSLR.[R]	0.00362755	0.000427246	4	26	8	CAA91196.1; XP_005251037.1; EAW82172.1; XP_011515432.1	CAA91196.1 [1029-1037]; XP_005251037.1 [897-905]; EAW82172.1 [919-927]; XP_011515432.1 [897-905]		0	1073.61	0.01	0.949166	127.7	102.3	110.4		5.7	9.79	25.73	10.07
	FALSE	High	[K].SIITYVSSLYDAMPR.[V]	1.18916e-08	1.93435e-05	4	26	4	CAA91196.1; XP_005251037.1; EAW82172.1; XP_011515432.1	CAA91196.1 [387-401]; XP_005251037.1 [255-269]; EAW82172.1 [277-291]; XP_011515432.1 [259-273]		0	1715.87	0.01	0.00483331	25	243.5	200.2			23.94	55.21	66.09
	FALSE	High	[K].SIITYVSSLYDAMPR.[V]	0.0683577	0.00506504	4	26	1	CAA91196.1; XP_005251037.1; EAW82172.1; XP_011515432.1	CAA91196.1 [387-401]; XP_005251037.1 [255-269]; EAW82172.1 [277-291]; XP_011515432.1 [259-273]		0	1731.86	0.223	6.09287e-17	161.7	158.6			6.78	20.32
	FALSE	High	[R].SIQEELQQLR.[Q]	6.30274e-05	1.93435e-05	4	25	20	CAA91196.1; XP_005251037.1; EAW82172.1; XP_011515432.1	CAA91196.1 [1554-1563]; XP_005251037.1 [1422-1431]; EAW82172.1 [1444-1453]; XP_011515432.1 [1422-1431]		0	1243.66	1.256	0.421322	139.9	74.3	84.7	18.27	4.19	3.24	10.18	5.99
	FALSE	High	[R].SLSAIYLEK.[L]	0.00431879	0.000483359	4	26	16	CAA91196.1; XP_005251037.1; EAW82172.1; XP_011515432.1	CAA91196.1 [1216-1224]; XP_005251037.1 [1084-1092]; EAW82172.1 [1106-1114]; XP_011515432.1 [1084-1092]		0	1023.57	0.979	0.789474	138.5	83.6	97.6	4.08	10.65	12.8	8.2	5.31
	FALSE	High	[R].SLVPAAELLESR.[V]	0.000107158	1.93435e-05	3	25	9	CAA91196.1; XP_005251037.1; XP_011515432.1	CAA91196.1 [3116-3127]; XP_005251037.1 [2984-2995]; XP_011515432.1 [2984-2995]		0	1284.72	0.996	0.296556	202.1	80.6		3.91	3.7	7.43	80.43
	FALSE	Medium	[K].SMIIDR.[R]	0.467158	0.0385561	3	26	11	CAA91196.1; XP_005251037.1; XP_011515432.1	CAA91196.1 [4329-4334]; XP_005251037.1 [4197-4202]; XP_011515432.1 [4197-4202]		0	734.387	1.012	0.908465	123.3	90.5	94.5	4.57	8.03	5.33	17.71	8.38
	FALSE	High	[R].SMVEEGTGLR.[L]	0.00164924	0.000154191	3	26	12	CAA91196.1; XP_005251037.1; XP_011515432.1	CAA91196.1 [4590-4599]; XP_005251037.1 [4458-4467]; XP_011515432.1 [4458-4467]		0	1078.52	0.657	0.973486	122.3	113.6	107.8	11.9	5.88	5.1	18.33	1.01
	FALSE	High	[R].SMVEEGTGLR.[L]	0.000271948	4.2772e-05	3	26	8	CAA91196.1; XP_005251037.1; XP_011515432.1	CAA91196.1 [4590-4599]; XP_005251037.1 [4458-4467]; XP_011515432.1 [4458-4467]		0	1094.51	100	6.09287e-17	108.1	116.5	74.7	34.58	16.92	22.03
	FALSE	High	[R].SNAEDTLR.[S]	0.011515	0.00104196	4	26	38	CAA91196.1; XP_005251037.1; EAW82172.1; XP_011515432.1	CAA91196.1 [2090-2097]; XP_005251037.1 [1958-1965]; EAW82172.1 [1980-1987]; XP_011515432.1 [1958-1965]		0	905.432	1.016	0.983939	108.7	100.8	103.2	15.64	9.07	12	16.55	27.35
	FALSE	High	[R].SQVEEELFSVR.[V]	5.8808e-06	1.93435e-05	4	26	14	CAA91196.1; XP_005251037.1; EAW82172.1; XP_011515432.1	CAA91196.1 [2361-2371]; XP_005251037.1 [2229-2239]; EAW82172.1 [2251-2261]; XP_011515432.1 [2229-2239]		0	1322.66	1.008	0.608731	152	84.3	69.9	4.92	4.88	4.7	5.2	8.9
	FALSE	High	[R].SQVMDEATALQLR.[E]	1.47434e-06	1.93435e-05	3	26	11	CAA91196.1; XP_005251037.1; XP_011515432.1	CAA91196.1 [4037-4049]; XP_005251037.1 [3905-3917]; XP_011515432.1 [3905-3917]		0	1461.74	0.725	0.93681	131.4	100.5	99.9	3.75	6.18	7.54	12.11	8.14
	FALSE	High	[R].SQVMDEATALQLR.[E]	1.77798e-05	1.93435e-05	3	26	4	CAA91196.1; XP_005251037.1; XP_011515432.1	CAA91196.1 [4037-4049]; XP_005251037.1 [3905-3917]; XP_011515432.1 [3905-3917]		0	1477.73	0.01	0.888547	129.7	89.8	143.3		44.75	15.1	36.3	5.93
	FALSE	High	[R].SSIAGLLLK.[A]	0.000410479	4.2772e-05	3	25	14	CAA91196.1; XP_005251037.1; XP_011515432.1	CAA91196.1 [2833-2841]; XP_005251037.1 [2701-2709]; XP_011515432.1 [2701-2709]		0	901.572	0.653	0.974952	107.7	119.7	121.2	10.45	9.42	5.9	5.53	7.5
	FALSE	High	[R].SSSVGSSSSYPISPAVSR.[T]	6.99839e-10	1.93435e-05	3	26	10	CAA91196.1; XP_005251037.1; XP_011515432.1	CAA91196.1 [4384-4401]; XP_005251037.1 [4252-4269]; XP_011515432.1 [4252-4269]		0	1754.86	0.468	0.557367	164.7	75.7	109.7	51.36	9.09	14.87	23.02	12.36
	FALSE	High	[R].SYVDPSTDER.[L]	0.000194933	4.2772e-05	3	26	30	CAA91196.1; XP_005251037.1; XP_011515432.1	CAA91196.1 [3982-3991]; XP_005251037.1 [3850-3859]; XP_011515432.1 [3850-3859]		0	1168.51	1.048	0.798692	131.9	89.2	89	4.75	3.58	4.57	20.58	7.16
	FALSE	Medium	[K].TAQLER.[S]	0.317517	0.0227663	4	25	10	CAA91196.1; XP_005251037.1; EAW82172.1; XP_011515432.1	CAA91196.1 [1726-1731]; XP_005251037.1 [1594-1599]; EAW82172.1 [1616-1621]; XP_011515432.1 [1594-1599]		0	717.389	1.599	0.950306	99.6	77.5	81.6	15.08	37.27	6	0.27	12.25
	FALSE	High	[K].TEAEIALK.[E]	0.00230926	0.000195525	4	26	15	CAA91196.1; XP_005251037.1; EAW82172.1; XP_011515432.1	CAA91196.1 [1987-1994]; XP_005251037.1 [1855-1862]; EAW82172.1 [1877-1884]; XP_011515432.1 [1855-1862]		0	874.488	1.169	0.861997	126.3	82.5	62	18.28	6.89	2.89	26.21	7.1
	FALSE	High	[R].TELATQEK.[V]	0.00280538	0.000282962	4	25	22	CAA91196.1; XP_005251037.1; EAW82172.1; XP_011515432.1	CAA91196.1 [2557-2564]; XP_005251037.1 [2425-2432]; EAW82172.1 [2447-2454]; XP_011515432.1 [2425-2432]		0	919.473	0.816	0.9352	100.6	104.2	106.9	21.91	16.31	9.47	7.59	9.97
	FALSE	Medium	[R].TEYNLR.[L]	0.191162	0.0132291	4	26	27	CAA91196.1; XP_005251037.1; EAW82172.1; XP_011515432.1	CAA91196.1 [623-628]; XP_005251037.1 [491-496]; EAW82172.1 [513-518]; XP_011515432.1 [491-496]		0	795.4	0.877	0.971867	113.4	109.4	108.3	1.71	20	16.91	17.54	6.95
	FALSE	High	[R].THYSELTTLTSQYIK.[F]	3.85788e-11	1.93435e-05	4	26	13	CAA91196.1; XP_005251037.1; EAW82172.1; XP_011515432.1	CAA91196.1 [1458-1472]; XP_005251037.1 [1326-1340]; EAW82172.1 [1348-1362]; XP_011515432.1 [1326-1340]		0	1784.91	0.431	0.904661	122.7	140.7	97.3	7.75	1.7	7.63	25.87	3.62
	FALSE	High	[R].TLKPEEQR.[Q]	0.0267083	0.00211867	4	26	10	CAA91196.1; XP_005251037.1; EAW82172.1; XP_011515432.1	CAA91196.1 [1053-1060]; XP_005251037.1 [921-928]; EAW82172.1 [943-950]; XP_011515432.1 [921-928]		0	1000.54	0.253	0.0223282	54.7	162.5	183.9	22.43	34.74	14.23	50.73	26.83
	FALSE	High	[R].TLLQGSGCLAGIYLEDTK.[E]	1.54401e-11	1.93435e-05	3	25	8	CAA91196.1; XP_005251037.1; XP_011515432.1	CAA91196.1 [3486-3503]; XP_005251037.1 [3354-3371]; XP_011515432.1 [3354-3371]		0	1939.97	0.83	0.98585	120.7	113.2	92.4	6.13	11.47	8.29	14.34	21.97
	FALSE	High	[K].TISLVIR.[G]	0.0557143	0.00435497	4	26	15	CAA91196.1; XP_005251037.1; EAW82172.1; XP_011515432.1	CAA91196.1 [1227-1233]; XP_005251037.1 [1095-1101]; EAW82172.1 [1117-1123]; XP_011515432.1 [1095-1101]		0	801.519	1.138	0.578926	138.4	74.4	104.2	9.47	13.28	17.18	9.86	2.29
	FALSE	High	[R].TPHVQAVQGPLGSPPK.[R]	0.000533612	4.2772e-05	1	4	4	CAA91196.1	CAA91196.1 [113-128]		0	1612.88	0.131	0.00445405	147.6	108.5	118.5	135.94	78.96	5.34	120.68	5.65
	FALSE	High	[K].TPVEVPVGGFK.[G]	4.76081e-06	1.93435e-05	3	25	16	CAA91196.1; XP_005251037.1; XP_011515432.1	CAA91196.1 [3374-3384]; XP_005251037.1 [3242-3252]; XP_011515432.1 [3242-3252]		0	1129.63	0.812	0.991475	108.9	109.7	115.6	6.9	5.49	8.2	7.58	1.71
	FALSE	High	[R].TQLASWSDPTEETGPVAGILDTETLEK.[V]	8.95835e-16	1.93435e-05	3	26	13	CAA91196.1; XP_005251037.1; XP_011515432.1	CAA91196.1 [4402-4428]; XP_005251037.1 [4270-4296]; XP_011515432.1 [4270-4296]		0	2888.4	0.782	0.984131	127.6	98.7	94.7	2.64	4.84	11.68	0.96	3.83
	FALSE	High	[K].TVTIWEIINSEYFTAEQR.[R]	3.25563e-13	1.93435e-05	3	25	3	CAA91196.1; XP_005251037.1; XP_011515432.1	CAA91196.1 [3058-3075]; XP_005251037.1 [2926-2943]; XP_011515432.1 [2926-2943]		0	2200.09	0.543	0.97628	128.9	122.4	117.2	16.72	42.01	4.05	10.31	70.17
	FALSE	High	[R].TVTVWELISSEYFTAEQR.[Q]	6.10632e-13	1.93435e-05	3	25	3	CAA91196.1; XP_005251037.1; XP_011515432.1	CAA91196.1 [3387-3404]; XP_005251037.1 [3255-3272]; XP_011515432.1 [3255-3272]		0	2159.07	0.219	0.846287	125.7	142.8	95.6	51.63	27.15	13.87	24.89	48.74
	FALSE	Medium	[R].VAEMSR.[A]	0.470449	0.038896	4	25	6	CAA91196.1; XP_005251037.1; EAW82172.1; XP_011515432.1	CAA91196.1 [2526-2531]; XP_005251037.1 [2394-2399]; EAW82172.1 [2416-2421]; XP_011515432.1 [2394-2399]		0	692.34	0.683	0.944112	108.8	122.1	94	16.29	33.65	19.14	23.53	26.12
	FALSE	High	[M].VAGMLMPR.[D]	0.00464475	0.000502794	1	4	3	CAA91196.1	CAA91196.1 [2-9]		0	874.464	0.838	0.987776	88.6	108.8	136.1	9.94	2.99	13.73	5.77	3.19
	FALSE	High	[R].VAQLLER.[W]	0.0202135	0.00164369	4	25	48	CAA91196.1; XP_005251037.1; EAW82172.1; XP_011515432.1	CAA91196.1 [1318-1324]; XP_005251037.1 [1186-1192]; EAW82172.1 [1208-1214]; XP_011515432.1 [1186-1192]		0	828.494	1.127	0.569373	147.1	83.6	80.4	12.08	3.68	0.56	7.85	4.51
	FALSE	High	[R].VDGAEWGVDLPSVEAQLGSHR.[G]	1.4675e-14	1.93435e-05	4	26	2	CAA91196.1; XP_005251037.1; EAW82172.1; XP_011515432.1	CAA91196.1 [676-696]; XP_005251037.1 [544-564]; EAW82172.1 [566-586]; XP_011515432.1 [544-564]		0	2222.08
	FALSE	Medium	[R].VKAEAEAAR.[E]	0.491925	0.0415308	4	24	1	CAA91196.1; XP_005251037.1; EAW82172.1; XP_011515432.1	CAA91196.1 [1658-1666]; XP_005251037.1 [1526-1534]; EAW82172.1 [1548-1556]; XP_011515432.1 [1526-1534]		1	944.516		6.09287e-17	151.7		217.6			8.5		34.12
	FALSE	High	[R].VLADPSDDTK.[G]	2.39175e-05	1.93435e-05	4	34	36	CAA91196.1; XP_005251037.1; XP_016869381.1; XP_011515432.1	CAA91196.1 [2979-2988]; [3638-3647]; XP_005251037.1 [2847-2856]; [3506-3515]; XP_016869381.1 [2408-2417]; [2944-2953]; [3475-3484]; [4009-4018]; XP_011515432.1 [2847-2856]; [3506-3515]		0	1060.52	0.991	0.785899	141.1	103.7	86.8	19.18	2.07	23.72	13.85	15.03
	FALSE	High	[K].VLALPEPSPAAPTLR.[S]	2.09304e-07	1.93435e-05	4	26	14	CAA91196.1; XP_005251037.1; EAW82172.1; XP_011515432.1	CAA91196.1 [1187-1201]; XP_005251037.1 [1055-1069]; EAW82172.1 [1077-1091]; XP_011515432.1 [1055-1069]		0	1531.88	0.858	0.881337	119.4	103.3	102.6	7.93	2.33	3.06	5.76	2.09
	FALSE	High	[R].VPDVQDGVR.[A]	0.00237775	0.000195525	3	25	20	CAA91196.1; XP_005251037.1; EAW82172.1	CAA91196.1 [402-410]; XP_005251037.1 [270-278]; EAW82172.1 [292-300]		0	984.511	0.867	0.945551	108	115.9	104.4	24.66	2.28	13.27	18.43	10.47
	FALSE	High	[R].VPLDEALQR.[G]	0.000187328	4.2772e-05	3	26	23	CAA91196.1; XP_005251037.1; XP_011515432.1	CAA91196.1 [4543-4551]; XP_005251037.1 [4411-4419]; XP_011515432.1 [4411-4419]		0	1040.57	0.993	0.699955	140	92.9	75.1	3.92	1.92	12.02	2.21	7.09
	FALSE	High	[R].VPLDVACAR.[G]	0.000663078	9.10162e-05	3	25	15	CAA91196.1; XP_005251037.1; XP_011515432.1	CAA91196.1 [3289-3297]; XP_005251037.1 [3157-3165]; XP_011515432.1 [3157-3165]		0	1001.51	0.851	0.919023	129.4	94.3	100.3	0.37	1.98	9.82	5.02	5.64
	FALSE	High	[K].VPPGYHPLDVEK.[E]	9.51697e-07	1.93435e-05	4	26	31	CAA91196.1; XP_005251037.1; EAW82172.1; XP_011515432.1	CAA91196.1 [494-505]; XP_005251037.1 [362-373]; EAW82172.1 [384-395]; XP_011515432.1 [362-373]		0	1350.71	0.885	0.936583	128.9	98	86.2	5.19	16.61	17.97	3.37	1.99
	FALSE	High	[K].VPPGYHPLDVEKEWGK.[L]	0.0086758	0.000802402	4	26	2	CAA91196.1; XP_005251037.1; EAW82172.1; XP_011515432.1	CAA91196.1 [494-509]; XP_005251037.1 [362-377]; EAW82172.1 [384-399]; XP_011515432.1 [362-377]		1	1850.94	0.083	0.0983898	38.7	148.2	270.3	41.23	11.81	7.55	43.07	3.98
	FALSE	High	[R].VPVDVAYQR.[G]	0.000193966	4.2772e-05	4	29	31	CAA91196.1; XP_005251037.1; XP_016869381.1; XP_011515432.1	CAA91196.1 [3620-3628]; XP_005251037.1 [3488-3496]; XP_016869381.1 [2926-2934]; XP_011515432.1 [3488-3496]		0	1046.56	0.816	0.858386	131.8	92.2	107.6	4.34	7.6	22.75	25.62	6.94
	FALSE	High	[R].VPVDVAYR.[RC]	0.00425643	0.000483359	4	34	27	CAA91196.1; XP_005251037.1; XP_016869381.1; XP_011515432.1	CAA91196.1 [2961-2968]; XP_005251037.1 [2829-2836]; XP_016869381.1 [771-778]; [1732-1739]; [2390-2397]; [3457-3464]; [3991-3998]; XP_011515432.1 [2829-2836]		0	918.504	0.609	0.800817	115.2	103.6	118.2	18.01	14.13	25.18	19.97	6.92
	FALSE	High	[R].VQMEELSK.[L]	0.00548025	0.000596903	4	26	25	CAA91196.1; XP_005251037.1; EAW82172.1; XP_011515432.1	CAA91196.1 [2372-2379]; XP_005251037.1 [2240-2247]; EAW82172.1 [2262-2269]; XP_011515432.1 [2240-2247]		0	963.482	1.065	0.861381	120	83.7	113.8	13.55	2.44	1.95	8.58	11.55
	FALSE	Medium	[R].VQMEELSK.[L]	0.214532	0.0149056	4	26	1	CAA91196.1; XP_005251037.1; EAW82172.1; XP_011515432.1	CAA91196.1 [2372-2379]; XP_005251037.1 [2240-2247]; EAW82172.1 [2262-2269]; XP_011515432.1 [2240-2247]		0	979.476	2.033	0.987104	147.8	130.3	76.8	64.75	41.39	25.65	118.7	28.59
	FALSE	High	[K].VQSGSESVIQEYVDLR.[T]	5.96561e-12	1.93435e-05	4	26	15	CAA91196.1; XP_005251037.1; EAW82172.1; XP_011515432.1	CAA91196.1 [1442-1457]; XP_005251037.1 [1310-1325]; EAW82172.1 [1332-1347]; XP_011515432.1 [1310-1325]		0	1808.9	0.782	0.99908	119.4	109.6	98.4	3.7	7.76	6.33	4.54	4.98
	FALSE	High	[K].VSITEAMHR.[N]	3.05942e-05	1.93435e-05	3	26	34	CAA91196.1; XP_005251037.1; XP_011515432.1	CAA91196.1 [4429-4437]; XP_005251037.1 [4297-4305]; XP_011515432.1 [4297-4305]		0	1043.53	0.68	0.973865	112.9	113.6	121.8	4.23	8.82	0.77	18.3	12.46
	FALSE	High	[K].VSIYEAMR.[R]	0.00411446	0.000483359	3	25	21	CAA91196.1; XP_005251037.1; XP_011515432.1	CAA91196.1 [3506-3513]; XP_005251037.1 [3374-3381]; XP_011515432.1 [3374-3381]		0	968.487	0.761	0.984404	109.2	109.8	109.5	2.29	3.86	4.24	9.55	3.8
	FALSE	High	[K].VSIYEAMR.[R]	0.0863166	0.00651117	3	25	1	CAA91196.1; XP_005251037.1; XP_011515432.1	CAA91196.1 [3506-3513]; XP_005251037.1 [3374-3381]; XP_011515432.1 [3374-3381]		0	984.482	100	6.09287e-17	149.5		125.8		102.58	60.01
	FALSE	High	[K].VTLVQTLEIQR.[Q]	3.6466e-06	1.93435e-05	4	25	12	CAA91196.1; XP_005251037.1; EAW82172.1; XP_011515432.1	CAA91196.1 [2565-2575]; XP_005251037.1 [2433-2443]; EAW82172.1 [2455-2465]; XP_011515432.1 [2433-2443]		0	1299.76	0.663	1	121.8	117.5	99.9	3.34	4.7	2.39	4.91	7.98
	FALSE	High	[R].VVIVDPETGK.[E]	7.81828e-05	1.93435e-05	3	26	30	CAA91196.1; XP_005251037.1; XP_011515432.1	CAA91196.1 [4278-4287]; XP_005251037.1 [4146-4155]; XP_011515432.1 [4146-4155]		0	1056.59	1.053	0.898663	137.8	93.8	58.7	14.22	6.02	16.26	10.53	2.85
	FALSE	High	[R].VVIVDPETGKEMSVYEAYR.[K]	2.42064e-10	1.93435e-05	3	26	2	CAA91196.1; XP_005251037.1; XP_011515432.1	CAA91196.1 [4278-4296]; XP_005251037.1 [4146-4164]; XP_011515432.1 [4146-4164]		1	2185.08	0.943	1	176.7	91.4	145.8					156.45
	FALSE	High	[R].WQAVLAQTDVR.[Q]	3.68422e-05	1.93435e-05	4	25	14	CAA91196.1; XP_005251037.1; EAW82172.1; XP_011515432.1	CAA91196.1 [1325-1335]; XP_005251037.1 [1193-1203]; EAW82172.1 [1215-1225]; XP_011515432.1 [1193-1203]		0	1286.69	0.697	0.888717	143	89.8	123.1	0.77	8.33	6.7	14.47	2.97
	FALSE	High	[R].YASGSSASLGGPESAVA.[-]	0.00207444	0.000195525	3	26	5	CAA91196.1; XP_005251037.1; XP_011515432.1	CAA91196.1 [4668-4684]; XP_005251037.1 [4536-4552]; XP_011515432.1 [4536-4552]		0	1510.7	0.726	0.973883	113.7	127.1	104.8	16.17	16.2	5.14	4.88	13.57
	FALSE	High	[R].YLQDLLAWVEENQHR.[V]	5.84675e-12	1.93435e-05	4	26	13	CAA91196.1; XP_005251037.1; EAW82172.1; XP_011515432.1	CAA91196.1 [661-675]; XP_005251037.1 [529-543]; EAW82172.1 [551-565]; XP_011515432.1 [529-543]		0	1913.95	0.762	0.990868	113.9	106.1	116.9	12.06	2.75	8.85	4.76	6.77
	FALSE	Medium	[K].YLTCPK.[T]	0.19777	0.0137559	3	26	2	CAA91196.1; XP_005251037.1; XP_011515432.1	CAA91196.1 [4571-4576]; XP_005251037.1 [4439-4444]; XP_011515432.1 [4439-4444]		0	782.375	0.909	0.939579	117.4	102.6	101.7	19.26	10.48	12.84	19.54	4.57
FALSE	High	Master Protein	NP_001367.2	0	1815.09	53	222	2510	222	4646	532.1	6.4	33193	222	DYNC1H1	1.148	1.251	1.194	0.703	0.897767	0.853919	0.903428	0.694283
	Checked	Confidence	Annotated Sequence	Qvality PEP	Qvality q-value	# Protein Groups	# Proteins	# PSMs	Master Protein Accessions	Positions in Master Proteins	Modifications in Master Proteins	# Missed Cleavages	Theo. MH+ [Da]	Abundance Ratio: (5000uM 24h) / (50uM 24h)	Abundance Ratio Adj. P-Value: (5000uM 6Days) / (50uM 24h)	Abundances (Grouped): 5000uM 6Days	Abundances (Grouped): 50uM 24h	Abundances (Grouped): 50uM 48h	Abundances (Grouped) CV [%]: 5000uM 24h	Abundances (Grouped) CV [%]: 5000uM 48h	Abundances (Grouped) CV [%]: 5000uM 6Days	Abundances (Grouped) CV [%]: 50uM 24h	Abundances (Grouped) CV [%]: 50uM 48h
	FALSE	High	[R].AATSPALFNR.[C]	0.0030173	0.00034628	1	7	5	NP_001367.2	NP_001367.2 [3079-3088]		0	1047.56	0.01	0.748081	165.1	86.2	69.2		41.41	40.04	18.61	2.47
	FALSE	High	[K].ADLAAVEAK.[V]	0.000282967	4.2772e-05	1	7	21	NP_001367.2	NP_001367.2 [3463-3471]		0	887.483	1.239	0.970393	121.2	95.8	47.7	3.63	34.41	6.76	14.94	7.5
	FALSE	High	[R].ADLIFTVDFEIATK.[E]	7.30081e-06	1.93435e-05	1	5	4	NP_001367.2	NP_001367.2 [4616-4629]		0	1582.84	0.86	0.927818	103.5	125.2	96.8	6.98		41.12	19.63	22.38
	FALSE	High	[R].AELGEYIR.[R]	0.0157489	0.00137497	1	7	15	NP_001367.2	NP_001367.2 [2512-2519]		0	950.494	1.174	0.950328	119.4	90.3	60.8	3.48	1.21	17.45	10.93	3.26
	FALSE	High	[K].AERPDVDEK.[R]	0.00898603	0.000802402	1	7	6	NP_001367.2	NP_001367.2 [3719-3727]		0	1058.51	1.765	0.474221	120.7	63.9	54.5	26.27	21.15	24.34	18.61	15.79
	FALSE	High	[K].AEVDMDTDAPQVSHKPGGEPK.[I]	9.65714e-10	1.93435e-05	1	7	25	NP_001367.2	NP_001367.2 [934-954]		0	2208.02	1.929	0.548157	126.6	70.8	30.3	7.2	10.3	14.07	21.61	12.9
	FALSE	High	[K].ALEHAFQLEHIMDLTR.[L]	5.21744e-11	1.93435e-05	1	7	5	NP_001367.2	NP_001367.2 [2436-2451]		0	1923.97	0.463	0.976974	145.1	142.4	61.4	11.89	12.97	27.93	17.78
	FALSE	High	[K].ALEHAFQLEHIMDLTR.[L]	2.90952e-05	1.93435e-05	1	7	2	NP_001367.2	NP_001367.2 [2436-2451]		0	1939.97	3.794	0.695219	96.3	37.3	23.1	77.49	46.3	43.17	54.05
	FALSE	High	[K].ALGEYLER.[E]	0.00631588	0.000710402	1	8	16	NP_001367.2	NP_001367.2 [1614-1621]		0	950.494	1.115	0.934475	94.6	94.9	101.8	7.14	8.99	7.64	11.15	2.26
	FALSE	High	[K].ALGHQLGR.[F]	0.00411446	0.000483359	1	10	11	NP_001367.2	NP_001367.2 [1918-1925]		0	851.485	1.498	0.910782	108.9	72.9	87.9	4.34	21.72	12.05	20.96	6.16
	FALSE	Medium	[K].AINTAVK.[S]	0.202595	0.0140697	1	7	5	NP_001367.2	NP_001367.2 [4083-4089]		0	716.43	1.663	0.733358	112.7	67.7	54.5	5.38	4.73	15.3	14.63	15.1
	FALSE	High	[R].ALPDMEVVGLNFSSATTPELLLK.[T]	2.42185e-07	1.93435e-05	1	7	4	NP_001367.2	NP_001367.2 [2611-2633]		0	2445.29	0.679	3.22982e-05	110.1	144	111.5	71.54			15.39	8.56
	FALSE	High	[R].ALPDMEVVGLNFSSATTPELLLK.[T]	6.51908e-13	1.93435e-05	1	7	7	NP_001367.2	NP_001367.2 [2611-2633]		0	2461.29	7.758	0.00170302	133.4	41.5	26.2	12.64	20.71	21.91	105.63	79.65
	FALSE	High	[K].ANEVEQMIR.[D]	0.00104691	0.000139161	1	7	6	NP_001367.2	NP_001367.2 [3430-3438]		0	1089.54	1.682	0.349449	139.1	54.5	72.1	34.98	25.85	15.88	19.23	4
	FALSE	High	[R].ASLACGPMVK.[W]	0.0598493	0.00462657	1	7	1	NP_001367.2	NP_001367.2 [3385-3394]		0	1034.5	1.256	0.995725	97.8	93.4	69.1	12.09	9.14	21.39	8.27	5.31
	FALSE	High	[K].ASVVTLPVYLNFTR.[A]	5.94026e-06	1.93435e-05	1	5	11	NP_001367.2	NP_001367.2 [4602-4615]		0	1579.88	0.897	7.28749e-06	119.1	113.3	107.5	12.23	4.57		40.24	2.68
	FALSE	High	[K].AVDDLNLHSYSNLPIWVNK.[L]	1.13651e-08	1.93435e-05	1	7	9	NP_001367.2	NP_001367.2 [884-902]		0	2198.12	1.475	0.837349	118.8	82.8	63.6	5.14	6.64	5.33	13.49	21.31
	FALSE	High	[R].AWTQVLLGQAEDK.[A]	3.86691e-07	1.93435e-05	1	7	5	NP_001367.2	NP_001367.2 [921-933]		0	1458.76	1.012	0.950306	103.4	99.6	87.3	7.68	4.69	5.26	19.79	10.41
	FALSE	High	[R].CYLTMTQALEAR.[L]	0.000274662	4.2772e-05	1	10	1	NP_001367.2	NP_001367.2 [1888-1899]		0	1457.68
	FALSE	High	[K].DFPLNDLLSATELDK.[I]	1.43706e-09	1.93435e-05	1	7	13	NP_001367.2	NP_001367.2 [338-352]		0	1690.85	1.193	0.991529	106.3	103.9	54.7	12.4	1.02	7.92	9.51	37.05
	FALSE	High	[K].DFPLNDLLSATELDKIR.[Q]	1.70204e-10	1.93435e-05	1	7	3	NP_001367.2	NP_001367.2 [338-354]		1	1960.04	0.215	6.25279e-08	127.7	135.6	119.4	68.43	42.05		24.09	22.22
	FALSE	High	[K].DHLYGTLDPNTR.[E]	7.48674e-06	1.93435e-05	1	7	24	NP_001367.2	NP_001367.2 [2262-2273]		0	1401.68	1.376	0.79949	122.5	76.1	60.3	9.56	17.06	13.53	9.55	5.84
	FALSE	High	[R].DLEASIAR.[Y]	0.0321439	0.00259092	1	7	22	NP_001367.2	NP_001367.2 [3439-3446]		0	874.463	0.929	0.924339	96.6	113.3	71.9	19.86	13.59	5.15	5.5	13.88
	FALSE	High	[R].DLPPVSGSIIWAK.[Q]	0.000318762	4.2772e-05	1	7	12	NP_001367.2	NP_001367.2 [640-652]		0	1382.77	0.934	0.955776	99.3	111.5	77.3	1.93	4.6	6.07	13.18	6.87
	FALSE	High	[K].DIQMPDGIR.[R]	0.0108331	0.000986687	1	5	9	NP_001367.2	NP_001367.2 [4293-4301]		0	1044.51	1.448	0.401028	127.2	79.6	57.9	10.3	6.59	6.4	10.76	5.03
	FALSE	High	[K].DSAIQQQVANLQMK.[I]	1.68274e-08	1.93435e-05	1	8	13	NP_001367.2	NP_001367.2 [1229-1242]		0	1573.8	1.691	0.670053	132.9	69	45.8	21.37	20.22	1.84	11.22	10.34
	FALSE	High	[K].DVLLVAQGEMALEEFLK.[Q]	5.52454e-10	1.93435e-05	1	8	4	NP_001367.2	NP_001367.2 [1448-1464]		0	1921	11.382	0.991531	143.3	80.3	52.1	0.84	1.58			10.51
	FALSE	High	[K].DYIPVDQEELR.[D]	8.47047e-05	1.93435e-05	1	7	6	NP_001367.2	NP_001367.2 [2880-2890]		0	1376.67	1.186	0.874463	122.8	86	57.7	11.84	4.55	2.86	10.91	2.27
	FALSE	High	[K].EALELTDTGLLSGSEER.[V]	2.41618e-11	1.93435e-05	1	8	8	NP_001367.2	NP_001367.2 [1302-1318]		0	1819.89	1.097	0.998308	116.7	95.8	57.5	3.72	3.09	3.06	9.26	6.63
	FALSE	High	[K].EDEGEEAASPMLQIQR.[D]	2.97524e-10	1.93435e-05	1	7	13	NP_001367.2	NP_001367.2 [2402-2417]		0	1802.82	2.165	0.517718	125.4	61.2	26.6	20.28	2.17	12.99	15.16	34.19
	FALSE	High	[K].EDLDKVEPAVIEAQNAVK.[S]	8.88302e-06	1.93435e-05	1	7	6	NP_001367.2	NP_001367.2 [3280-3297]		1	1968.03	1.111	0.910782	129.7	90.4	63.2	4.29	3.24	6.32	9.82	9.02
	FALSE	High	[K].EDVGDEGEEEK.[E]	1.4038e-05	1.93435e-05	1	8	12	NP_001367.2	NP_001367.2 [86-96]		0	1235.49	2.894	0.732305	112.3	69		18.02	17.14	8.1	23.53
	FALSE	High	[R].EEFVQWVELLPDTQTPSWLGLPNNAER.[V]	5.13928e-11	1.93435e-05	1	5	4	NP_001367.2	NP_001367.2 [4303-4329]		0	3168.56	0.321	0.523484	67.1	181.8	42.2	2.75	11.33	16.54	55.93	2.88
	FALSE	High	[K].EFGPVVIDYGK.[V]	0.00148124	0.000154191	1	8	1	NP_001367.2	NP_001367.2 [1101-1111]		0	1223.63	1.011	0.958195	101.3	107.2	69.5	8.2	5.73	5.73	4.52	10.73
	FALSE	High	[R].EGEEVMFK.[T]	0.0215246	0.00169327	1	8	2	NP_001367.2	NP_001367.2 [1680-1687]		0	968.439	1.29	0.963142	93.5	127.5	64.9	34.81	13.32	31.09	24.86	44.1
	FALSE	High	[K].EGLMLDSHEELYK.[W]	7.56244e-06	1.93435e-05	1	7	2	NP_001367.2	NP_001367.2 [3040-3052]		0	1563.74	0.746	0.912412	101.4	88.3	92.2	55.29	59.88	20.2	63.62	44.27
	FALSE	High	[K].EGLMLDSHEELYK.[W]	0.000284375	4.2772e-05	1	7	4	NP_001367.2	NP_001367.2 [3040-3052]		0	1579.73	100	6.09287e-17	126.1			15.85	14.4	32.32
	FALSE	High	[K].EGTEAWEAAMK.[R]	5.23527e-05	1.93435e-05	1	7	7	NP_001367.2	NP_001367.2 [541-551]		0	1222.54	100	6.09287e-17	128.7	65.3		27.05	12.24	29.47
	FALSE	High	[K].EHINSVSAMK.[L]	5.67277e-05	1.93435e-05	1	8	9	NP_001367.2	NP_001367.2 [1499-1508]		0	1115.55	1.148	0.813302	126.7	88.2	76.6	18.08	16.1	17.96	3.41	12.14
	FALSE	High	[K].EQPWVSVQPR.[K]	0.000666354	9.10162e-05	1	8	15	NP_001367.2	NP_001367.2 [1348-1357]		0	1225.63	1.37	1	102.4	89.5	50.9	10.58	9.08	14.16	0.12	16.17
	FALSE	High	[R].ESPEVLLTLDILK.[H]	6.52554e-07	1.93435e-05	1	7	15	NP_001367.2	NP_001367.2 [293-305]		0	1469.85	1.088	0.932176	125.6	94.6	55.4	7.84	3.62	1.34	11.94	6.5
	FALSE	High	[K].ETVDQVEELR.[R]	0.005955	0.000634693	1	7	1	NP_001367.2	NP_001367.2 [3210-3219]		0	1217.6
	FALSE	Medium	[K].ETVDQVEELRR.[D]	0.212507	0.014698	1	7	8	NP_001367.2	NP_001367.2 [3210-3220]		1	1373.7	0.712	0.99177	92.4	94.9	119.7	0.55	3.54	15.76	27.67	2.09
	FALSE	High	[K].EVDGLDVSK.[E]	0.00364516	0.000427246	1	7	2	NP_001367.2	NP_001367.2 [532-540]		0	961.484
	FALSE	High	[R].EWTDGLFTHVLR.[K]	7.57492e-08	1.93435e-05	1	7	15	NP_001367.2	NP_001367.2 [2274-2285]		0	1473.75	0.826	0.894851	138.2	94.3	64.5	2.69	4.39	2.61	6	5.18
	FALSE	High	[R].EYQTQLIQR.[V]	0.00438207	0.000483359	1	7	17	NP_001367.2	NP_001367.2 [603-611]		0	1178.62	1.15	0.971297	108.3	94.2	70.7	5.91	8.01	26.84	5.13	8.33
	FALSE	High	[R].FGNPLLVQDVESYDPVLNPVLNR.[E]	1.72792e-10	1.93435e-05	1	6	10	NP_001367.2	NP_001367.2 [3629-3651]		0	2598.36	0.94	0.987379	135.5	114.8	111.5	32.35	104.44	20.2	18.71	13.27
	FALSE	High	[K].FGQMLGSNMTEFHSQISK.[S]	5.26315e-09	1.93435e-05	1	8	6	NP_001367.2	NP_001367.2 [1131-1148]		0	2041.95	0.391	0.8951	84.5	140.1	106.5	30.96	37.85	36.9	34.62	25.68
	FALSE	High	[K].FGQMLGSNMTEFHSQISK.[S]	6.55528e-10	1.93435e-05	1	8	8	NP_001367.2	NP_001367.2 [1131-1148]		0	2057.94	2.918	6.09287e-17		43.6	109.6	9.89			64.42
	FALSE	High	[R].FHATVSFDTDTGLK.[Q]	0.00046689	4.2772e-05	1	7	1	NP_001367.2	NP_001367.2 [310-323]		0	1538.75
	FALSE	High	[K].FLSDPQVHTVLVER.[S]	5.02332e-07	1.93435e-05	1	8	11	NP_001367.2	NP_001367.2 [68-81]		0	1639.88	1.805	0.235213	153.6	60.3	42.7	26.47	7.59	7.48	12.72	6.23
	FALSE	High	[K].FNYGFEYLGVQDK.[L]	4.55699e-08	1.93435e-05	1	8	1	NP_001367.2	NP_001367.2 [1866-1878]		0	1579.74	1.094	0.957483	123.2	94	70.3	8.83	1.75	1.53	8.11	6.43
	FALSE	High	[R].FQSISTEFLALMK.[K]	6.94266e-06	1.93435e-05	1	8	10	NP_001367.2	NP_001367.2 [1568-1580]		0	1514.79	0.386	0.814916	114.1	142.1	94.1	7.15	28.61	16.1	22.75	21.96
	FALSE	High	[R].FQSISTEFLALMK.[K]	1.12925e-06	1.93435e-05	1	8	5	NP_001367.2	NP_001367.2 [1568-1580]		0	1530.79	2.936	0.859034	109.1	33.4	111	36.14	51.64	69.1	66.97	42.29
	FALSE	High	[R].FTQDTQPHYIYSPR.[E]	6.48965e-10	1.93435e-05	1	7	18	NP_001367.2	NP_001367.2 [2784-2797]		0	1752.83	0.884	0.975701	115	94.8	112	10.87	6.35	15.39	14.34	21.12
	FALSE	Medium	[R].FYFDPK.[Q]	0.415371	0.0330504	1	8	11	NP_001367.2	NP_001367.2 [1844-1849]		0	816.393	1.057	0.954634	100.3	103.2	69.1	4.84	4.43	1.82	7.26	8.07
	FALSE	High	[R].FYFVGDEDLLEIIGNSK.[N]	2.35615e-11	1.93435e-05	1	8	12	NP_001367.2	NP_001367.2 [1629-1645]		0	1958.97	0.888	0.83776	101.1	134.9	18.7	7.36	2.97	4.06	22.35	19.18
	FALSE	High	[R].GEAVDEGEIAENLPEQEILIQSVCETMVPK.[L]	1.51604e-10	1.93435e-05	1	7	8	NP_001367.2	NP_001367.2 [2119-2148]		0	3344.58	100	6.09287e-17	165.6			13.28	43.47	11.65
	FALSE	Medium	[R].GEMTALR.[E]	0.194918	0.0134616	1	7	7	NP_001367.2	NP_001367.2 [2173-2179]		0	777.392	0.866	0.599259	138.9	75.1	106.3	16.35	20.87	11.71	32.39	35.21
	FALSE	High	[K].GKEDEGEEAASPMLQIQR.[D]	9.23982e-16	1.93435e-05	1	7	12	NP_001367.2	NP_001367.2 [2400-2417]		1	1987.94	0.877	0.398191	92	144.2	24.7	16.91	14.66	7.45	3.08	63.67
	FALSE	High	[R].GIFEALRPLETLPVEGLIR.[I]	8.81649e-13	1.93435e-05	1	7	14	NP_001367.2	NP_001367.2 [2805-2823]		0	2123.22	1.003	0.919482	104.2	107.5	64.8	3.55	12.8	18.38	6.02	14.49
	FALSE	High	[R].GNEIVLSAGSTPR.[I]	6.55846e-07	1.93435e-05	1	7	18	NP_001367.2	NP_001367.2 [3911-3923]		0	1300.69	1.072	0.985527	113.4	93.7	65.7	7.43	2.84	8.73	3.57	2.62
	FALSE	High	[R].GTFDNAETK.[K]	0.0102454	0.000875016	1	8	18	NP_001367.2	NP_001367.2 [1091-1099]		0	982.448	1.44	0.916182	115.7	80	46.9	9.74	17.13	12.72	7.3	5.86
	FALSE	High	[R].GTFDNAETKK.[E]	0.0475506	0.00386473	1	8	2	NP_001367.2	NP_001367.2 [1091-1100]		1	1110.54
	FALSE	High	[K].GTVGEPTYDAEFQHFLR.[G]	7.71468e-09	1.93435e-05	1	7	14	NP_001367.2	NP_001367.2 [3894-3910]		0	1966.93	0.741	0.910151	104	117.5	86.7	7.1	3.17	5.54	11.08	5.54
	FALSE	High	[K].GVWSELSK.[V]	0.0389468	0.00323384	1	8	6	NP_001367.2	NP_001367.2 [1331-1338]		0	905.473	0.536	0.721283	92.9	122.3	70.1	48.28	36.04	3.95	3.36	2.68
	FALSE	High	[R].GWDDLFNK.[V]	0.0545041	0.00425954	1	8	14	NP_001367.2	NP_001367.2 [1489-1496]		0	994.463	1.089	1	108.3	99.4	65.9	1.55	4.23	2.69	8.96	3.97
	FALSE	High	[K].GWENHVEGQK.[L]	0.000525755	4.2772e-05	1	7	21	NP_001367.2	NP_001367.2 [672-681]		0	1183.55	1.485	0.987379	91.3	79.3	91.6	17.83	25.17	8.68	11.55	12.5
	FALSE	High	[K].HFPNIDR.[E]	0.0572675	0.0044275	1	7	18	NP_001367.2	NP_001367.2 [2857-2863]		0	898.453	1.389	0.995726	103.6	83	73.4	13	13	7.4	7.05	8.19
	FALSE	High	[K].HLLPVETQR.[F]	0.00155538	0.000154191	1	8	22	NP_001367.2	NP_001367.2 [1559-1567]		0	1092.62	1.089	0.989274	107.4	99.4	83.8	15.45	4.18	1.28	10.62	5.05
	FALSE	High	[R].KDSAIQQQVANLQMK.[I]	0.0242905	0.00195499	1	8	2	NP_001367.2	NP_001367.2 [1228-1242]		1	1701.9	0.786	0.987379	104.3	109.8	78.6	18.79	5.98	12.1	16.42	9.85
	FALSE	High	[K].KEFGPVVIDYGK.[V]	0.000457736	4.2772e-05	1	8	1	NP_001367.2	NP_001367.2 [1100-1111]		1	1351.73	0.01	0.9575	103.2	252.6	46.4		26.85
	FALSE	High	[K].KYEFGESDLR.[S]	2.64462e-05	1.93435e-05	1	6	16	NP_001367.2	NP_001367.2 [4204-4213]		1	1243.6	1.109	0.989836	106.8	88.9	71.2	10.22	10.86	30.27	9.93	7.66
	FALSE	High	[R].KYTGEDFDEDLR.[T]	7.00235e-05	1.93435e-05	1	7	15	NP_001367.2	NP_001367.2 [2966-2977]		1	1487.66	1.111	0.881337	112.7	77.9	70.4	23.04	23.85	17.92	18.16	10.23
	FALSE	High	[R].LADLLGK.[I]	0.0585433	0.00451785	1	8	21	NP_001367.2	NP_001367.2 [1604-1610]		0	729.451	1.489	0.860423	131.6	88.1	39	14.31	5.65	20.18	15.02	18.33
	FALSE	High	[R].LAETVFNFQEK.[V]	6.87317e-06	1.93435e-05	1	7	4	NP_001367.2	NP_001367.2 [836-846]		0	1325.67	0.849	0.957233	109.8	108.9	77.4	11.55	8.9	3.49	22.22	6.95
	FALSE	High	[K].IAFIMDESNVLDSGFLER.[M]	1.39362e-12	1.93435e-05	1	7	12	NP_001367.2	NP_001367.2 [2990-3007]		0	2056.01	0.351	0.889794	107.4	142.6	99.1	35.58	33.42	21.36	24.39	21.39
	FALSE	High	[K].IAFIMDESNVLDSGFLER.[M]	3.62029e-10	1.93435e-05	1	7	5	NP_001367.2	NP_001367.2 [2990-3007]		0	2072	5.348	0.735021	111.6	29.9	75.7	19.35	12.4	10.6	60.56	47.77
	FALSE	High	[K].LALESICLLLGESTTDWK.[Q]	8.14957e-12	1.93435e-05	1	7	9	NP_001367.2	NP_001367.2 [3319-3336]		0	2050.04	0.579	0.83914	101.4	122.6	98.9	35.6	11.71	16.13	32.95	45.47
	FALSE	High	[K].LCDEQLSSQSHYDFGLR.[A]	2.43285e-10	1.93435e-05	1	7	14	NP_001367.2	NP_001367.2 [2075-2091]		0	2055.91	1.122	0.427216	153.3	66	48.8	21.52	7.85	9.09	22.25	26.6
	FALSE	Medium	[K].IDLEVR.[S]	0.298884	0.0212081	1	7	17	NP_001367.2	NP_001367.2 [857-862]		0	744.425	1.057	0.838715	92.9	106.2	82.5	6.44	7.56	10.15	14.68	3.16
	FALSE	High	[K].LDMEIER.[I]	0.0286071	0.00225453	1	7	24	NP_001367.2	NP_001367.2 [903-909]		0	905.44	1.149	0.977948	116.1	89.9	64.1	10.36	0.84	18.37	3.76	5.64
	FALSE	High	[K].LDRDPASGTALQEISFWLNLER.[A]	1.07334e-09	1.93435e-05	1	7	1	NP_001367.2	NP_001367.2 [262-283]		1	2531.29	100	1.95716e-06	181.1	56.8	135.9	70.47	60.06	122.69		39.64
	FALSE	High	[R].LEGVEGVAHIIDPK.[A]	1.03148e-06	1.93435e-05	1	7	11	NP_001367.2	NP_001367.2 [2244-2257]		0	1476.81	1.044	0.932989	94.8	104.6	68.2	20.2	16.88	17.83	14.27	0.83
	FALSE	High	[K].LEHLITELVHQR.[D]	7.78207e-07	1.93435e-05	1	8	1	NP_001367.2	NP_001367.2 [1808-1819]		0	1487.83	0.01	0.973267	375.9	97.9	26.3					30.44
	FALSE	High	[R].LFLTMEINPK.[V]	4.17695e-05	1.93435e-05	1	7	15	NP_001367.2	NP_001367.2 [4124-4133]		0	1205.66	0.711	0.997694	121.7	112.5	69.7	6.05	8.59	4.58	2.62	6.19
	FALSE	High	[R].IFTIESTR.[V]	0.00572646	0.000615159	1	7	16	NP_001367.2	NP_001367.2 [717-724]		0	966.525	0.985	0.882796	98.2	103.6	75.3	5.37	4.61	17.07	8.04	3.71
	FALSE	High	[R].IFVFEPPPGVK.[A]	1.77798e-05	1.93435e-05	1	7	15	NP_001367.2	NP_001367.2 [4144-4154]		0	1229.69	1.331	0.974804	112.1	91.1	61.5	2.5	2.68	5.06	12.3	0.31
	FALSE	High	[R].IFVGLCQVGAWGCFDEFNR.[L]	1.64314e-10	1.93435e-05	1	9	1	NP_001367.2	NP_001367.2 [1944-1962]		0	2277.01	0.01	1	167.1	165.1	64.1		38.39	7.74	18.62
	FALSE	High	[R].LGEDLNK.[W]	0.0942898	0.00694267	1	8	2	NP_001367.2	NP_001367.2 [1072-1078]		0	788.415	1.887	0.772378	107	66.6	54.4	11.92	16.43	38.69	23.63	52.1
	FALSE	High	[R].LGGSPFGPAGTGK.[T]	4.99811e-07	1.93435e-05	1	10	16	NP_001367.2	NP_001367.2 [1900-1912]		0	1145.59	1.396	0.919173	106.5	83.8	58.4	13.04	5.7	37.22	7.51	24.67
	FALSE	High	[K].LHSLQPHACFR.[L]	0.0159126	0.00137497	1	7	1	NP_001367.2	NP_001367.2 [4113-4123]		0	1366.67	0.01	6.09287e-17		177.8	322.2					8.64
	FALSE	Medium	[K].IKETVDQVEELRR.[D]	0.455676	0.0373477	1	7	1	NP_001367.2	NP_001367.2 [3208-3220]		2	1614.88	0.01	6.09287e-17		112.6	320				38.99	13.88
	FALSE	High	[K].LKQDGDSFR.[M]	0.0137028	0.0012172	1	7	6	NP_001367.2	NP_001367.2 [682-690]		1	1065.53	1.085	0.766617	68.7	104.6	97.1	12.27	19.75	32.88	32.71	23.38
	FALSE	High	[K].LLAESVTEVEIFGK.[A]	6.88431e-08	1.93435e-05	1	8	17	NP_001367.2	NP_001367.2 [1716-1729]		0	1534.84	1.113	0.984731	101.3	98	102.2	47.66	5.25	5.1	38.42	23.76
	FALSE	High	[R].ILDDDTIITTLENLK.[R]	1.685e-10	1.93435e-05	1	7	14	NP_001367.2	NP_001367.2 [3760-3774]		0	1716.93	1.243	0.903	115.6	99.7	37.1	3.73	3.08	9.98	14.81	7.67
	FALSE	High	[R].ILDDDTIITTLENLKR.[E]	1.83208e-11	1.93435e-05	1	7	14	NP_001367.2	NP_001367.2 [3760-3775]		1	1873.03	0.856	0.855971	69.3	104.4	127.1	7.35	13.03	27.75	32.82	12.27
	FALSE	High	[R].LLLIQAFRPDR.[L]	0.000757348	9.10162e-05	1	7	14	NP_001367.2	NP_001367.2 [3990-4000]		0	1341.8	0.599	0.665066	95.8	137.7	116.1	9.53	9.67	9.93	21.88	5.08
	FALSE	High	[R].LLNTFLER.[L]	0.0035066	0.000427246	1	5	16	NP_001367.2	NP_001367.2 [4264-4271]		0	1005.57	1.288	0.934592	106.2	76.8	73.7	21.15	12.08	3.11	19.98	7.36
	FALSE	High	[K].LLTLPNGER.[L]	0.0168455	0.00144114	1	7	8	NP_001367.2	NP_001367.2 [2324-2332]		0	1012.58	0.923	0.973563	104.6	106.2	77.8	9.85	2.04	6.12	9.61	10.42
	FALSE	High	[R].IMFEVQDLK.[Y]	0.00053098	4.2772e-05	1	7	6	NP_001367.2	NP_001367.2 [2341-2349]		0	1122.59	0.816	0.354834	82.2	134.9	82.9	6.91	4.4	5.5	7.8	6.5
	FALSE	High	[R].IMFEVQDLK.[Y]	0.00102661	0.000139161	1	7	6	NP_001367.2	NP_001367.2 [2341-2349]		0	1138.58	6.393	0.113805	124.3	31.8	80.1	40.37		40.35	52.94	48.92
	FALSE	High	[K].LMHVAYEEFEK.[V]	0.00030788	4.2772e-05	1	7	13	NP_001367.2	NP_001367.2 [401-411]		0	1395.66	1.02	0.664284	77.3	115.8	119.2	15.01	9.46	4.87	25.2	3.99
	FALSE	High	[K].INEWLTLVEK.[E]	2.83734e-05	1.93435e-05	1	8	12	NP_001367.2	NP_001367.2 [1698-1707]		0	1244.69	1.035	0.994893	117.8	98.3	65.6	1.65	4.3	0.73	10.89	4.68
	FALSE	High	[K].INMLVIELK.[S]	0.000128271	1.93435e-05	1	8	7	NP_001367.2	NP_001367.2 [1396-1404]		0	1072.64	0.01	0.441865	86.3	225.7	112.2		48	51.74	68.56	68.97
	FALSE	High	[K].INMLVIELK.[S]	0.00808905	0.000755527	1	8	1	NP_001367.2	NP_001367.2 [1396-1404]		0	1088.64	0.717	0.813666	120.7	92.4	134.2	8.62	2.3	2.21	7.73	6.34
	FALSE	High	[K].LNTQEIFDDWAR.[K]	3.24254e-07	1.93435e-05	1	7	10	NP_001367.2	NP_001367.2 [693-704]		0	1507.72	1.03	0.970196	104.6	104.3	69.9	3.24	6.04	1.64	15.11	14.94
	FALSE	Medium	[K].LPQPPSHR.[E]	0.410627	0.0324823	1	7	4	NP_001367.2	NP_001367.2 [3133-3140]		0	931.511	0.925	0.995725	101.7	96.4	145	31.17	30.08	12.17	5.87	15.75
	FALSE	High	[R].IQFVGACNPPTDPGR.[K]	2.29454e-09	1.93435e-05	1	7	15	NP_001367.2	NP_001367.2 [2706-2720]		0	1629.77	1.181	0.996401	111.7	90.9	74.1	2.82	3.34	8.53	14.5	11.79
	FALSE	High	[K].LQGATCNNNK.[L]	0.000435621	4.2772e-05	1	5	50	NP_001367.2	NP_001367.2 [4565-4574]		0	1120.51	1.372	0.919379	93	119.2	45.7	49.05	15.14	14.27	30.03	26.11
	FALSE	High	[K].LQGEFQLR.[L]	0.00209477	0.000195525	1	7	14	NP_001367.2	NP_001367.2 [3734-3741]		0	990.537	1.062	0.593235	113.3	89.3	97	0.65	4.9	18.31	23.78	7.66
	FALSE	High	[R].IQGLTVEQAEAVVR.[L]	8.50426e-08	1.93435e-05	1	6	10	NP_001367.2	NP_001367.2 [3924-3937]		0	1512.84	0.979	0.987304	107.2	101.1	71.5	2.1	10.32	6.07	5.54	9.77
	FALSE	Medium	[K].LQVLLR.[D]	0.449146	0.0365292	1	7	3	NP_001367.2	NP_001367.2 [430-435]		0	741.498	1.5	0.966256	109	91.3	61.1	10.59	9.79	7.61	17.33	5.79
	FALSE	Medium	[R].LRDQLGTAK.[N]	0.39034	0.0301232	1	7	1	NP_001367.2	NP_001367.2 [568-576]		1	1001.57	100	6.09287e-17	69.1		214.4	28.8	37.39	8.24		35.54
	FALSE	High	[R].LSCLPAFK.[D]	0.00355794	0.000427246	1	6	13	NP_001367.2	NP_001367.2 [3938-3945]		0	936.486	0.953	0.972239	106.7	107.6	66.2	7.01	3.17	3.14	12.61	9.07
	FALSE	Medium	[R].LSIITK.[D]	0.39034	0.0301232	1	7	16	NP_001367.2	NP_001367.2 [3856-3861]		0	674.445	1.109	0.990699	112.6	93.6	78.2	3.06	3.95	3.86	13.67	5.14
	FALSE	Medium	[R].LSLPPNVR.[I]	0.393431	0.0303949	1	7	14	NP_001367.2	NP_001367.2 [2333-2340]		0	895.536	1.358	0.860773	74.1	100.7	66.6	32.51	2.57	8.42	31.47	24.29
	FALSE	High	[K].LSLSNAISTALPLTQLR.[W]	1.51604e-10	1.93435e-05	1	5	19	NP_001367.2	NP_001367.2 [4575-4591]		0	1798.04	0.984	0.97622	126.2	100.4	59.6	8.16	1.26	2.48	7.08	9.43
	FALSE	Medium	[K].LSPYYK.[V]	0.342654	0.0252021	1	8	12	NP_001367.2	NP_001367.2 [1509-1514]		0	770.408	0.716	0.974286	78.9	86	170.4	10.01	35.43	16.32	18.57	32.88
	FALSE	High	[R].ITNQVIYLNPPIEECR.[Y]	2.92674e-08	1.93435e-05	1	7	9	NP_001367.2	NP_001367.2 [964-979]		0	1959.98	0.759	0.903249	109.3	109.5	92.5	7.1	2.75	5.98	17.14	15.71
	FALSE	High	[R].LVEAISR.[D]	0.0755522	0.00557568	1	7	8	NP_001367.2	NP_001367.2 [380-386]		0	787.467	1.417	0.975916	109.4	89.5	60.4	9.75	8.76	7.95	18.99	5.66
	FALSE	Medium	[R].LVEDEER.[R]	0.260508	0.0182076	1	7	9	NP_001367.2	NP_001367.2 [2837-2843]		0	889.426	1.147	0.988886	104	105.8	48	11.73	53.02	4.47	31.67	9.58
	FALSE	Medium	[K].IVPFFK.[L]	0.405905	0.0318557	1	7	6	NP_001367.2	NP_001367.2 [2069-2074]		0	750.455	1.071	0.977102	115	90.8	88.7	9.22	13.43	1.95	9.9	15
	FALSE	High	[K].LVPLLLEDGGEAPAALEAALEEK.[S]	5.97664e-11	1.93435e-05	1	7	9	NP_001367.2	NP_001367.2 [37-59]		0	2348.26	1.195	0.576305	154.4	80.1	35.9	9.79	3.18	7.99	8.61	4.34
	FALSE	Medium	[K].IVQEDR.[A]	0.404337	0.0317225	1	8	4	NP_001367.2	NP_001367.2 [1243-1248]		0	759.4	0.01	0.00253618	232.8	41.6	21.1		2.47	25.69	15.55	65.68
	FALSE	High	[K].LVQTPLTDR.[C]	0.000512915	4.2772e-05	1	8	21	NP_001367.2	NP_001367.2 [1879-1887]		0	1042.59	1.503	0.722136	110.3	84.9	67.2	11.48	1.61	24.53	17.36	1.55
	FALSE	High	[R].IWAHEALR.[L]	0.00171494	0.000154191	1	7	31	NP_001367.2	NP_001367.2 [2824-2831]		0	995.542	1.297	0.614859	160.4	72.4	51.9	23.44	17.42	10.38	11.39	20.5
	FALSE	High	[K].LYQEMFAWK.[M]	0.00124843	0.000154191	1	7	5	NP_001367.2	NP_001367.2 [982-990]		0	1215.59	0.442	0.7347	98.6	143.8	166.8	86.54	18.15	22.24	41.59	31.12
	FALSE	High	[K].MAPSVEK.[K]	0.117879	0.00858476	1	8	5	NP_001367.2	NP_001367.2 [178-184]		0	761.386	1.617	0.996148	89.4	75.8	47.4	16.65	16.33	18.39	2.81	16.43
	FALSE	High	[K].MDLEKPNYIVPDYMPVVYDK.[L]	9.26369e-08	1.93435e-05	1	7	6	NP_001367.2	NP_001367.2 [3113-3132]		0	2429.18	0.6	0.189081	92.1	118	72.8	31.15	58.58	86.92	14.32	18.89
	FALSE	High	[K].MDLEKPNYIVPDYMPVVYDK.[L]	4.19109e-07	1.93435e-05	1	7	7	NP_001367.2	NP_001367.2 [3113-3132]		0	2445.17	1.434	0.821744	134.1	77	68.3	10.95	47.78	13.65	3.82	7.25
	FALSE	High	[R].MLSAVSQQVQCIQEALR.[E]	6.21064e-12	1.93435e-05	1	9	3	NP_001367.2	NP_001367.2 [1967-1983]		0	1961.98		6.09287e-17	201.5		98.8			4.54
	FALSE	High	[R].MPDGPVALEESYSAVMGIVSEVEQYVK.[V]	1.71521e-14	1.93435e-05	1	8	6	NP_001367.2	NP_001367.2 [1026-1052]		0	2959.4	2.253	0.917275	107.1	70.4	25.6	49.76	13.56	33.32	11.09	21.24
	FALSE	High	[K].MQMLEDEDDLAYAETEK.[K]	1.17666e-11	1.93435e-05	1	6	10	NP_001367.2	NP_001367.2 [4346-4362]		0	2030.86	1.27	1	112.8	87.8	47.5	24.97	18.22	16.45	16.3	24.14
	FALSE	High	[K].MQMLEDEDDLAYAETEKK.[T]	3.31904e-08	1.93435e-05	1	6	4	NP_001367.2	NP_001367.2 [4346-4363]		1	2158.95
	FALSE	High	[K].NANEMFR.[I]	0.0359451	0.00295769	1	7	21	NP_001367.2	NP_001367.2 [577-583]		0	881.393	1.446	0.912492	119	83.5	56.2	13.14	6.59	2.43	17.25	5.96
	FALSE	High	[K].NLESALR.[F]	0.0557143	0.00435497	1	6	10	NP_001367.2	NP_001367.2 [3622-3628]		0	802.442	1.435	0.958009	118.1	88.5	47.5	3.26	9.9	2.93	12.6	8.84
	FALSE	High	[R].NLGVSGR.[I]	0.100162	0.00744605	1	7	2	NP_001367.2	NP_001367.2 [710-716]		0	702.389	1.291	0.924284	99.6	93	65.1	13.84	8.75	21.12	23.02	16.81
	FALSE	High	[K].NIHVCLGGLFVPEAYITATR.[Q]	4.36322e-07	1.93435e-05	1	5	3	NP_001367.2	NP_001367.2 [4506-4525]		0	2232.15	1	0.00948938	204.3	45	74.6		58.99	85.61		54.84
	FALSE	High	[R].NTISLLVAGLK.[K]	4.34811e-05	1.93435e-05	1	7	15	NP_001367.2	NP_001367.2 [799-809]		0	1128.7	0.882	0.976987	119.5	117.9	61	15.99	9.33	2.1	8.23	1.48
	FALSE	High	[R].NVAQYNANHPDFPMQIEQLER.[Y]	1.50161e-07	1.93435e-05	1	7	1	NP_001367.2	NP_001367.2 [2468-2488]		0	2514.18	0.683	0.981773	139.9	96.3	91.1	53.55	26.13	11.14	9.43	60.96
	FALSE	High	[K].NVHLAPGWLMQLEK.[K]	2.96578e-09	1.93435e-05	1	7	11	NP_001367.2	NP_001367.2 [4098-4111]		0	1635.87	0.01	0.582697	91.2	202.1	115.2		76.57	50.17	36.22	49.31
	FALSE	High	[K].NVHLAPGWLMQLEK.[K]	2.10734e-06	1.93435e-05	1	7	5	NP_001367.2	NP_001367.2 [4098-4111]		0	1651.86	100	6.09287e-17	88.5	42.9	67.4	13.06	41.58	33.22		55.02
	FALSE	Medium	[K].NVVHELR.[I]	0.313456	0.0223361	1	7	10	NP_001367.2	NP_001367.2 [957-963]		0	866.484	0.609	0.0989594	76.2	153	43.5	8.76	16.57	11.95	5.18	22.77
	FALSE	High	[K].NYMSNPSYNYEIVNR.[A]	1.52932e-08	1.93435e-05	1	7	15	NP_001367.2	NP_001367.2 [3370-3384]		0	1863.83	1.085	0.974671	125.1	97.1	63.3	14.6	4.18	6.12	6.43	21.18
	FALSE	High	[K].NYMSNPSYNYEIVNR.[A]	4.27418e-10	1.93435e-05	1	7	4	NP_001367.2	NP_001367.2 [3370-3384]		0	1879.83
	FALSE	High	[K].QALETVNDYNPLMK.[D]	0.00238935	0.000195525	1	7	1	NP_001367.2	NP_001367.2 [324-337]		0	1634.77
	FALSE	High	[K].QALETVNDYNPLMK.[D]	3.05667e-09	1.93435e-05	1	7	11	NP_001367.2	NP_001367.2 [324-337]		0	1635.8	1.093	0.982361	114	92.5	85.8	9.88		0.49	10.49	74.86
	FALSE	High	[K].QALETVNDYNPLMK.[D]	2.76695e-05	1.93435e-05	1	7	2	NP_001367.2	NP_001367.2 [324-337]		0	1651.8
	FALSE	High	[R].QALVAIFTHLR.[K]	0.000240193	4.2772e-05	1	7	1	NP_001367.2	NP_001367.2 [355-365]		0	1268.75	100	6.09287e-17	219.1		87.4		19.86	35.16
	FALSE	High	[K].QDGDSFR.[M]	0.0743023	0.00543736	1	7	10	NP_001367.2	NP_001367.2 [684-690]		0	824.353	0.916	0.960485	104.3	109.2	53.6	19.01	29.5	12.25	24.41	30.32
	FALSE	High	[R].QDLADVVQVCEGK.[K]	5.72537e-07	1.93435e-05	1	6	3	NP_001367.2	NP_001367.2 [4429-4441]		0	1444.66	1.381	0.851357	123.4	70	47.1	15.69	9.23	4.38	35.28	35.58
	FALSE	High	[R].QDLADVVQVCEGK.[K]	4.45193e-07	1.93435e-05	1	6	7	NP_001367.2	NP_001367.2 [4429-4441]		0	1461.69	1.488	0.497311	145.4	71	35.4	20.28	9.48	6.63	6.4	2.97
	FALSE	Medium	[R].QDLADVVQVCEGKK.[K]	0.141896	0.0100976	1	6	2	NP_001367.2	NP_001367.2 [4429-4442]		1	1589.78		6.09287e-17	206.3		43.7		7.75	5.67
	FALSE	High	[K].QHLVEVR.[S]	0.116618	0.0085152	1	7	10	NP_001367.2	NP_001367.2 [3302-3308]		0	863.473	1.287	0.730536	137.2	81.1	48.1	9.66	9.75	6.83	8.97	2
	FALSE	Medium	[K].QHLVEVR.[S]	0.154144	0.0108694	1	7	11	NP_001367.2	NP_001367.2 [3302-3308]		0	880.5	2.319	0.859454	99.3	62.1	68.6	25.66	27.11	10.61	68.61	22.27
	FALSE	High	[R].QMVEHGGFYR.[T]	8.38608e-05	1.93435e-05	1	7	9	NP_001367.2	NP_001367.2 [2685-2694]		0	1206.54	1.19	0.923153	127.5	91.4	54.7	4.64	2.55	15.58	3.32	3.01
	FALSE	Medium	[R].QMVEHGGFYR.[T]	0.294998	0.0209977	1	7	3	NP_001367.2	NP_001367.2 [2685-2694]		0	1222.53
	FALSE	High	[R].QMVEHGGFYR.[T]	0.0155065	0.00137497	1	7	4	NP_001367.2	NP_001367.2 [2685-2694]		0	1223.56	1.106	0.948873	109.6	82.4	88.5	22.72	8.14	45.74	30.17	31.15
	FALSE	High	[R].QMVEHGGFYR.[T]	0.0173783	0.00145836	1	7	1	NP_001367.2	NP_001367.2 [2685-2694]		0	1239.56	100	0.135357	68.6	208.6		92.99	37.14	3.68
	FALSE	High	[R].QNLDALLNQLK.[S]	4.24033e-05	1.93435e-05	1	8	14	NP_001367.2	NP_001367.2 [1361-1371]		0	1252.69	1.304	0.986273	106.1	95.3	65.8	12.6	1.88	4.47	10.8	9.41
	FALSE	High	[R].QNISPDKIPWSALK.[T]	1.87372e-07	1.93435e-05	1	5	1	NP_001367.2	NP_001367.2 [4231-4244]		1	1579.85	1.378	6.09287e-17		96.9	67.6	16.38	8.02		25.51	24.31
	FALSE	High	[R].QNISPDKIPWSALK.[T]	2.30708e-06	1.93435e-05	1	5	4	NP_001367.2	NP_001367.2 [4231-4244]		1	1596.87	0.646	0.997203	138.1	107.8	85.6	13.74	12.59	8.46	8.25	3.62
	FALSE	High	[R].QPQGHLLLIGVSGAGK.[T]	1.95068e-07	1.93435e-05	1	7	3	NP_001367.2	NP_001367.2 [2928-2943]		0	1557.87	0.01	0.0191789	168.3	43.4	218.8			67.07	66.62	132.99
	FALSE	High	[R].QPQGHLLLIGVSGAGK.[T]	0.000114924	1.93435e-05	1	7	12	NP_001367.2	NP_001367.2 [2928-2943]		0	1574.9	0.793	0.767524	153	87.8	76.6	19.56	23.4	9.75	10.45	8.07
	FALSE	High	[K].QQEVIADK.[Q]	0.00640965	0.000710402	1	7	19	NP_001367.2	NP_001367.2 [3267-3274]		0	930.489	1.538	0.897007	110.1	95	59.7	3.97	26.67	24.34	24.15	26.75
	FALSE	Medium	[K].QVELYR.[N]	0.42173	0.0336041	1	8	4	NP_001367.2	NP_001367.2 [1186-1191]		0	807.436	0.01	0.707071	193.5	68.6	103.6			27.56	21.59	10.7
	FALSE	High	[R].QWIVFDGDVDPEWVENLNSVLDDNK.[L]	9.87167e-09	1.93435e-05	1	7	6	NP_001367.2	NP_001367.2 [2299-2323]		0	2929.35	0.53	0.00726995	44.6	149.5	90.7	71.9	14.21	104.58	38.2	26.38
	FALSE	High	[R].QWIVFDGDVDPEWVENLNSVLDDNK.[L]	6.16292e-08	1.93435e-05	1	7	3	NP_001367.2	NP_001367.2 [2299-2323]		0	2946.38
	FALSE	High	[R].QYASYEFVQR.[L]	4.13522e-05	1.93435e-05	1	8	14	NP_001367.2	NP_001367.2 [1379-1388]		0	1290.61	1.081	0.927994	101.5	110.8	51.2	12.63	19.13	2.28	8.34	25.53
	FALSE	High	[R].REEFVQWVELLPDTQTPSWLGLPNNAER.[V]	8.59895e-16	1.93435e-05	1	5	2	NP_001367.2	NP_001367.2 [4302-4329]		1	3324.66	1.461	0.000400747	18.3	133.8	64.8	78.37	14.03	2.8	22.89
	FALSE	High	[K].RVEDVLGK.[G]	0.0618665	0.00474802	1	7	10	NP_001367.2	NP_001367.2 [664-671]		1	915.526	1.533	0.950761	103.7	85.6	63.6	7.73	3.31	10.29	19.18	15.11
	FALSE	High	[R].SACDTVDTWLDDTAK.[AG]	1.18916e-08	1.93435e-05	1	6	12	NP_001367.2	NP_001367.2 [4214-4228]		0	1698.72	1.221	0.997459	108.7	96.1	58.3	5.26	6.09	4.82	8.67	15.06
	FALSE	Medium	[K].SALEQMR.[K]	0.210496	0.0146203	1	7	4	NP_001367.2	NP_001367.2 [60-66]		0	834.414	1.833	0.658166	122.3	71.7	57.7	9.37	8.25	6.63	12.58	15.34
	FALSE	High	[R].SELEEQQMHLNVGLR.[K]	1.31021e-10	1.93435e-05	1	7	10	NP_001367.2	NP_001367.2 [3192-3206]		0	1782.88	0.061	0.734687	153.6	94.6	64.9	123.97	9.22	6.67	54.77	27.18
	FALSE	High	[M].SEPGGGGGEDGSAGLEVSAVQNVADVSVLQK.[H]	5.81683e-05	1.93435e-05	1	7	2	NP_001367.2	NP_001367.2 [2-32]	NP_001367.2 1xAcetyl [N-Term]	0	2955.42	1	6.09287e-17	195.1	96.9			53.12	42.57
	FALSE	High	[R].SFDSEFK.[L]	0.0661185	0.00495099	1	5	11	NP_001367.2	NP_001367.2 [4277-4283]		0	859.383	1.32	0.696153	145.7	81.6	50.4	1.04	4.27	5.99	6.5	4.59
	FALSE	High	[K].SFEWLSQMR.[F]	0.00149578	0.000154191	1	8	3	NP_001367.2	NP_001367.2 [1835-1843]		0	1183.56	1.435	0.989836	109	86.5	60.9	9.88	2.85	2.19	12.64	62.49
	FALSE	High	[R].SLAMTKPDR.[Q]	0.000172989	4.2772e-05	1	7	15	NP_001367.2	NP_001367.2 [2038-2046]		0	1018.53	1.13	0.903229	111.7	106.9	49.6	18.94	22.54	16.81	29.56	50.71
	FALSE	High	[R].SLETCMYDHK.[T]	0.000512915	4.2772e-05	1	7	22	NP_001367.2	NP_001367.2 [863-872]		0	1284.52	1.326	0.869908	86	98.5	65.8	24.16	20.85	5.81	12.66	13.63
	FALSE	High	[K].SLLQALNEVK.[G]	0.00808905	0.000755527	1	7	1	NP_001367.2	NP_001367.2 [3748-3757]		0	1114.65	0.936	0.990881	115.4	94.8	91.2	0.85	6.32	5.92	22.46	10.67
	FALSE	High	[R].SIPLDEGEDEAQR.[R]	1.03148e-06	1.93435e-05	1	7	27	NP_001367.2	NP_001367.2 [2384-2396]		0	1458.67	1.559	0.727752	111.6	75.2	46.1	9.19	7.26	18.38	12.26	9.18
	FALSE	Medium	[R].SIPLDEGEDEAQRR.[R]	0.205531	0.0143203	1	7	1	NP_001367.2	NP_001367.2 [2384-2397]		1	1614.77	0.651	1	79.2	102.9	150.1	11.11	1.73	21.06	51.34	4.12
	FALSE	High	[R].SMANPPAAVK.[L]	0.000241389	4.2772e-05	1	7	25	NP_001367.2	NP_001367.2 [3309-3318]		0	985.514	1.528	0.884079	118.8	77.2	61.7	2.69	7.16	6.25	16.5	12.51
	FALSE	High	[R].SNLPDNLK.[K]	0.0114564	0.00102369	1	7	12	NP_001367.2	NP_001367.2 [2026-2033]		0	900.479	1.355	0.995711	113.8	92.4	61.9	15.22	2.46	19.74	19.71	4.16
	FALSE	High	[R].SNLPDNLKK.[L]	0.117879	0.00858476	1	7	9	NP_001367.2	NP_001367.2 [2026-2034]		1	1028.57	1.207	0.502875	122.7	69.1	69.5	29.79	21.3	17.07	37.37	30.81
	FALSE	High	[K].SNSLAFIK.[R]	0.0314687	0.0025594	1	8	15	NP_001367.2	NP_001367.2 [113-120]		0	879.493	1.544	0.910023	104.7	86.4	70.5	13.75	2.81	10.17	65.55	5.5
	FALSE	High	[K].SPLVMDVLNIQGVQR.[S]	2.27881e-10	1.93435e-05	1	8	10	NP_001367.2	NP_001367.2 [1585-1599]		0	1668.91	0.553	0.869648	116.4	129.9	72.6	39.72	41.56	25.2	18.06	26.41
	FALSE	High	[K].SPLVMDVLNIQGVQR.[S]	6.08536e-05	1.93435e-05	1	8	4	NP_001367.2	NP_001367.2 [1585-1599]		0	1684.91	1.298	0.93736	100.1	118.3		6.22	1.16	7.36	4.71
	FALSE	Medium	[K].SQELEVK.[N]	0.232341	0.0160225	1	7	1	NP_001367.2	NP_001367.2 [3226-3232]		0	832.441	1.559	0.672512	108.5	83.6	53.8	5.6	7.62	22.79	2.46	1.9
	FALSE	High	[R].SSLQSQCLNEVLK.[A]	1.38975e-05	1.93435e-05	1	7	7	NP_001367.2	NP_001367.2 [3706-3718]		0	1506.75	1.278	0.85906	123.7	81.3	56.4	5.62	8.86	1.9	14.35	4.57
	FALSE	High	[K].SVLVSAGNVK.[R]	0.000819312	9.10162e-05	1	7	27	NP_001367.2	NP_001367.2 [2095-2104]		0	973.568	1.071	0.904859	91.9	107.6	78.9	11.28	7.51	3.54	5.25	7.05
	FALSE	High	[R].TAEVLANK.[I]	0.0034393	0.000427246	1	7	12	NP_001367.2	NP_001367.2 [2061-2068]		0	845.473	1.516	0.958009	113.3	78.8	67.5	7.69	7.22	9.94	11.99	5.57
	FALSE	Medium	[R].TCEKVEER.[N]	0.149455	0.0105916	1	7	2	NP_001367.2	NP_001367.2 [791-798]		1	1051.47	0.01	6.09287e-17		168.7	331.3				85.63	6.9
	FALSE	High	[R].TDSTSDGRPAWMR.[T]	7.36215e-05	1.93435e-05	1	6	24	NP_001367.2	NP_001367.2 [4366-4378]		0	1479.66	1.236	0.976374	113	99.5	73.8	30.7	29.13	6.91	31.57	10.23
	FALSE	High	[R].TEYLSNADER.[L]	0.000227417	4.2772e-05	1	6	24	NP_001367.2	NP_001367.2 [3550-3559]		0	1197.54	1.542	0.764782	122.3	76.6	56.3	14.77	1.31	4.31	18.27	15.15
	FALSE	High	[K].TFDHYCEYR.[R]	0.000366253	4.2772e-05	1	7	21	NP_001367.2	NP_001367.2 [2634-2642]		0	1291.5	1.29	0.982716	100.7	97.1	56.7	4.04	5.17	4.56	6.74	5.81
	FALSE	High	[K].TFSEILNR.[V]	0.00669992	0.000722819	1	7	3	NP_001367.2	NP_001367.2 [873-880]		0	979.521	100	6.09287e-17	110.4	93.5	74.3	5.54	3.78	5.26		9.28
	FALSE	High	[R].TLINELVK.[G]	0.00247219	0.000195525	1	6	13	NP_001367.2	NP_001367.2 [4450-4457]		0	929.567	0.584	0.443541	101	161.2	48.2	3.61	2.07	3.6	3.39	7.76
	FALSE	High	[R].TMAITPR.[H]	0.08584	0.00649854	1	7	21	NP_001367.2	NP_001367.2 [3168-3174]		0	789.429	1.044	0.994157	121.6	104.9	47.4	5.12	1.7	2.89	24.83	17.11
	FALSE	High	[R].TPNGVVLAPVQLGK.[W]	1.12925e-06	1.93435e-05	1	7	14	NP_001367.2	NP_001367.2 [2644-2657]		0	1392.82	1.073	0.882796	140	89.3	63.3	3.5	6.67	6.12	10	4.59
	FALSE	High	[R].TPVIDADKPVSSQLR.[V]	8.05717e-10	1.93435e-05	1	8	29	NP_001367.2	NP_001367.2 [122-136]		0	1625.89	1.264	1	108.5	90.6	55	5.6	5.75	3.74	6.22	3.11
	FALSE	High	[K].TPVSITEHPK.[I]	7.01286e-06	1.93435e-05	1	8	18	NP_001367.2	NP_001367.2 [1688-1697]		0	1108.6	1.016	0.882338	133.6	91.2	63.5	24.16	9.74	11.69	21.67	11.43
	FALSE	High	[K].TSAPITCELLNK.[Q]	1.1012e-06	1.93435e-05	1	9	21	NP_001367.2	NP_001367.2 [1993-2004]		0	1347.68	1.425	0.9028	113.7	83.2	66.3	4.96	3.35	4.62	5.05	3.56
	FALSE	High	[R].TSDQTWVK.[L]	0.00288833	0.000304168	1	7	17	NP_001367.2	NP_001367.2 [2695-2702]		0	964.473	1.62	0.771652	123.9	78	55.8	16.54	5.86	10.3	14.9	3.13
	FALSE	High	[R].TSFLDDAFR.[K]	0.000301828	4.2772e-05	1	6	11	NP_001367.2	NP_001367.2 [3612-3620]		0	1071.51	1.418	0.935771	117.3	82.9	59.5	3.89	4.62	3.33	9.09	7.1
	FALSE	High	[R].TTDLLTDWEK.[T]	2.08826e-05	1.93435e-05	1	8	12	NP_001367.2	NP_001367.2 [1254-1263]		0	1221.6	1.044	0.934645	128.9	96.8	52.1	7.92	7.11	4.74	1.07	4.62
	FALSE	High	[R].TVENIKDPLFR.[F]	4.23347e-07	1.93435e-05	1	6	22	NP_001367.2	NP_001367.2 [4401-4411]		1	1331.73	1.65	0.703182	121.7	73.5	63.7	23.64	14.94	6.31	12.5	17.32
	FALSE	High	[K].VAAPDVVVPTLDTVR.[H]	8.51975e-07	1.93435e-05	1	7	14	NP_001367.2	NP_001367.2 [2562-2576]		0	1551.87	1.244	0.989482	114.3	91.6	60.6	2	4.76	4.3	12.51	4.41
	FALSE	High	[K].VAEVLFDAADANAIEEVNLAYENVK.[E]	3.83337e-09	1.93435e-05	1	7	1	NP_001367.2	NP_001367.2 [507-531]		0	2707.35	0.01	6.09287e-17		500					53.95
	FALSE	High	[K].VDDLLIIEEK.[I]	1.89805e-05	1.93435e-05	1	7	10	NP_001367.2	NP_001367.2 [847-856]		0	1186.66	1.226	0.829916	130.3	86.2	36.1	9.45	5.05	4.76	8.51	14.53
	FALSE	High	[R].VDNEFDQR.[L]	0.00228687	0.000195525	1	5	20	NP_001367.2	NP_001367.2 [4256-4263]		0	1022.45	1.206	0.88213	123.9	86.1	56.3	15.7	8.79	22.45	12.26	4.05
	FALSE	High	[K].VEDPTFLNQLQSGVNR.[W]	1.06063e-10	1.93435e-05	1	8	6	NP_001367.2	NP_001367.2 [236-251]		0	1816.92	100	6.09287e-17	168.1			10.68	5.59	2.18
	FALSE	High	[K].VEPAVIEAQNAVK.[S]	5.10819e-06	1.93435e-05	1	7	11	NP_001367.2	NP_001367.2 [3285-3297]		0	1367.75	2.863	0.92891	90.2	59.4	19.9	7.17	5.19	7.51	21.33
	FALSE	High	[K].VFEEDALSWEDK.[L]	7.94028e-07	1.93435e-05	1	8	14	NP_001367.2	NP_001367.2 [1515-1526]		0	1467.66	0.938	0.991531	129.2	116.9	44.5	8.8	7.53	1.57	12.84	8.12
	FALSE	High	[K].VFEEDALSWEDKLNR.[I]	8.03155e-09	1.93435e-05	1	8	7	NP_001367.2	NP_001367.2 [1515-1529]		1	1850.89	0.693	0.620476	75.5	122.6	141.3	9.65	6.7	7.46	24.21	8.62
	FALSE	High	[K].VFYEEELDVPLVLFNEVLDHVLR.[I]	3.01896e-13	1.93435e-05	1	7	2	NP_001367.2	NP_001367.2 [2899-2921]		0	2787.46	0.194	0.00116268	12.9	130.4	47.3	67.11	45.11	47.44	81.97	59.19
	FALSE	High	[R].VKDDIESLHDK.[F]	6.70247e-06	1.93435e-05	1	7	14	NP_001367.2	NP_001367.2 [612-622]		1	1298.66	1.505	0.855393	69	84.8	74.3	19.4	38.2	16.03	26.22	2.53
	FALSE	High	[R].VLLTTQGVDMISK.[M]	1.45226e-06	1.93435e-05	1	5	6	NP_001367.2	NP_001367.2 [4330-4342]		0	1404.78
	FALSE	High	[R].VLLTTQGVDMISK.[M]	1.67389e-05	1.93435e-05	1	5	7	NP_001367.2	NP_001367.2 [4330-4342]		0	1420.77	100	6.09287e-17	278.5
	FALSE	High	[R].VLRPQVTAVAQQNQGEVPEPQDMK.[V]	1.15051e-15	1.93435e-05	1	7	12	NP_001367.2	NP_001367.2 [483-506]		0	2662.36	0.827	0.287695	168.7	65.3	20.8	90.37	6.89	31.85	11.78	54.75
	FALSE	High	[R].VLTLSEDSPYETLHSFISNAVAPFFK.[S]	1.73897e-12	1.93435e-05	1	8	7	NP_001367.2	NP_001367.2 [137-162]		0	2912.47	1.041	0.944653	123.2	137.4	19.5	25.76	34.8	35.05	82.21	129.76
	FALSE	High	[K].VMSQEIQEQLHK.[Q]	1.67738e-07	1.93435e-05	1	7	11	NP_001367.2	NP_001367.2 [3255-3266]		0	1469.74	1.204	0.933964	87.7	97.1	59.3	12.88	14.35	23.29	5.17	3.39
	FALSE	High	[K].VNFLPEIITLSK.[E]	8.11415e-06	1.93435e-05	1	7	10	NP_001367.2	NP_001367.2 [737-748]		0	1373.8	1.025	0.995369	119.7	100.5	60.9	15.23	4.09	2.05	11.11	0.99
	FALSE	High	[R].VPLAIVNK.[A]	0.00242451	0.000195525	1	7	14	NP_001367.2	NP_001367.2 [760-767]		0	853.551	1.019	0.943682	115.5	85.2	70.2	10.1	9.29	27.27	17.27	4.11
	FALSE	High	[K].VPQIEVETHK.[V]	5.18586e-06	1.93435e-05	1	7	31	NP_001367.2	NP_001367.2 [2552-2561]		0	1179.64	1.37	0.988639	90.2	89.9	78	21.12	16.84	12.05	28.36	7.54
	FALSE	High	[K].VPVNLLR.[A]	0.0359451	0.00295769	1	7	25	NP_001367.2	NP_001367.2 [4134-4140]		0	810.52	1.1	0.927168	96.9	103	74.4	8.7	7.72	1.03	7.84	5.46
	FALSE	High	[R].VQVALEELQDLK.[G]	5.82194e-06	1.93435e-05	1	6	10	NP_001367.2	NP_001367.2 [1319-1330]		0	1384.77	1.13	0.915362	123.3	90.3	55.7	7.76	2.51	3.82	3.69	5.39
	FALSE	High	[K].VQYPQSQACK.[M]	0.000835566	9.10162e-05	1	7	21	NP_001367.2	NP_001367.2 [625-634]		0	1209.56	1.766	0.518447	123.6	66.7	50.7	29.45	19.07	13.38	37.77	2.64
	FALSE	High	[K].VTDFGDK.[V]	0.109294	0.0081504	1	8	4	NP_001367.2	NP_001367.2 [229-235]		0	781.373	4.097	0.798229	96.8	69.7		34.7	15.62	29.27	3.3
	FALSE	High	[K].VTDFGDKVEDPTFLNQLQSGVNR.[W]	6.3454e-14	1.93435e-05	1	8	15	NP_001367.2	NP_001367.2 [229-251]		1	2579.27	0.944	0.973563	110.5	109.8	71.8	2.26	7.24	7.46	7.78	7.27
	FALSE	Medium	[R].VTFVNFTVTR.[S]	0.157333	0.0110366	1	7	1	NP_001367.2	NP_001367.2 [3696-3705]		0	1183.65	0.767	0.065106	158.5	35.6	163.2	6.02	3.53	5.93	48.81	79.65
	FALSE	High	[K].VWEQIDQMK.[E]	0.000586135	4.2772e-05	1	8	7	NP_001367.2	NP_001367.2 [1339-1347]		0	1176.57	1.396	0.984723	103.9	91.7	61.9	12.94	8.31	7.57	15.71	13.4
	FALSE	High	[K].VWEQIDQMK.[E]	0.0148027	0.00132206	1	8	1	NP_001367.2	NP_001367.2 [1339-1347]		0	1192.57	1.004	0.977874	87.1	105.1	104.8	10.04	7.26	2.75	10.89	3.52
	FALSE	High	[K].WAIAQLNYADMLK.[R]	1.36907e-08	1.93435e-05	1	7	11	NP_001367.2	NP_001367.2 [3395-3407]		0	1536.79	0.285	0.847349	117.1	139	102.1	17.72	40.24	26.17	19.45
	FALSE	High	[K].WAIAQLNYADMLK.[R]	2.88289e-08	1.93435e-05	1	7	4	NP_001367.2	NP_001367.2 [3395-3407]		0	1552.78	100	6.09287e-17	136.9		91.9	21.3	34.06	28.64		108.82
	FALSE	High	[K].WFTSQVIR.[N]	0.00277825	0.000282962	1	7	13	NP_001367.2	NP_001367.2 [3053-3060]		0	1036.56	1.051	0.989732	113.9	100.6	68.7	10.57	8.3	2.14	9.88	2.8
	FALSE	High	[K].WLVLFCDEINLPDMDK.[Y]	1.67429e-08	1.93435e-05	1	7	3	NP_001367.2	NP_001367.2 [2658-2673]		0	2024.93	1.176	0.946821	131.2	101.2	21.4	16.19	10.95	11.98	27.22
	FALSE	High	[K].WQALLVQIR.[K]	0.000191093	4.2772e-05	1	8	11	NP_001367.2	NP_001367.2 [1079-1087]		0	1126.67	0.773	0.92891	103.3	117.7	83.6	11.43	1.16	3.18	13.13	1.76
	FALSE	High	[R].WQASSLPADDLCTENAIMLK.[R]	1.90381e-12	1.93435e-05	1	6	8	NP_001367.2	NP_001367.2 [3562-3581]		0	2264.06	1.242	0.945557	100.4	98.2	80.6	3.88	4.06	20.66	34.48	15.65
	FALSE	High	[R].WQASSLPADDLCTENAIMLK.[R]	3.46464e-12	1.93435e-05	1	6	6	NP_001367.2	NP_001367.2 [3562-3581]		0	2280.05	100	6.09287e-17	120.7	37.5	63.9	40.62	42.04	44.83		55.63
	FALSE	High	[R].WTDENIDTVALK.[H]	5.29127e-06	1.93435e-05	1	7	6	NP_001367.2	NP_001367.2 [2845-2856]		0	1404.7	0.794	0.903373	91.7	105.7	135.2	3.07	6.96	15.07	3.06	5.88
	FALSE	High	[R].YAPLGWSK.[K]	0.00935509	0.000802402	1	6	12	NP_001367.2	NP_001367.2 [4196-4203]		0	921.483	1.159	0.995277	106.7	99.2	72.1	8.7	8.19	11.94	11	7.56
	FALSE	High	[K].YATLATVSR.[C]	0.0346284	0.00285738	1	7	8	NP_001367.2	NP_001367.2 [2350-2358]		0	981.536	0.699	0.815519	152.9	93.2	67.4	8.61	8.89	9.45	35.18	10.76
	FALSE	High	[K].YEFGESDLR.[S]	0.000780024	9.10162e-05	1	6	11	NP_001367.2	NP_001367.2 [4205-4213]		0	1115.5	0.955	0.917442	121.3	87.4	57.8	22.37	1.81	2.13	40.77	12.46
	FALSE	High	[R].YPLIIDPSGQATEFIMNEYK.[D]	2.25788e-15	1.93435e-05	1	6	11	NP_001367.2	NP_001367.2 [3586-3605]		0	2329.14	0.08	0.942126	140.3	152.9	69.3	110.6	66.49	38.93	19.13	40.89
	FALSE	High	[R].YPLIIDPSGQATEFIMNEYK.[D]	1.23675e-14	1.93435e-05	1	6	10	NP_001367.2	NP_001367.2 [3586-3605]		0	2345.14	2.103	0.805554	118.5	90.9	38.8	11.29	29.9	45.14	42.67
	FALSE	High	[R].YQVGVHYELTEEEK.[F]	1.34669e-06	1.93435e-05	1	7	5	NP_001367.2	NP_001367.2 [1004-1017]		0	1723.82	0.01	0.995277	155.7	126.6	108		11.51	19.78	23.2	3.07
	FALSE	High	[K].YTGEDFDEDLR.[T]	9.62738e-06	1.93435e-05	1	7	13	NP_001367.2	NP_001367.2 [2967-2977]		0	1359.57	1.721	0.631108	137.2	74.2	34.3	8.22	3.21	5.78	20.49	16.6
FALSE	High	Master Protein	NP_008835.5	0	1644.63	52	202	2647	162	4128	468.8	7.12	39003	202	PRKDC	0.779	0.882	1.383	1.102	0.653051	0.868544	0.766727	0.950795
	Checked	Confidence	Annotated Sequence	Qvality PEP	Qvality q-value	# Protein Groups	# Proteins	# PSMs	Master Protein Accessions	Positions in Master Proteins	Modifications in Master Proteins	# Missed Cleavages	Theo. MH+ [Da]	Abundance Ratio: (5000uM 24h) / (50uM 24h)	Abundance Ratio Adj. P-Value: (5000uM 6Days) / (50uM 24h)	Abundances (Grouped): 5000uM 6Days	Abundances (Grouped): 50uM 24h	Abundances (Grouped): 50uM 48h	Abundances (Grouped) CV [%]: 5000uM 24h	Abundances (Grouped) CV [%]: 5000uM 48h	Abundances (Grouped) CV [%]: 5000uM 6Days	Abundances (Grouped) CV [%]: 50uM 24h	Abundances (Grouped) CV [%]: 50uM 48h
	FALSE	High	[K].AALSALESFLK.[Q]	5.73474e-06	1.93435e-05	1	7	16	NP_008835.5	NP_008835.5 [311-321]		0	1149.65	0.791	0.903373	136.3	102.4	102.4	14.05	1.64	3.83	2.67	7.46
	FALSE	Medium	[R].AFLGELK.[T]	0.152568	0.0107572	1	7	18	NP_008835.5	NP_008835.5 [199-205]		0	777.451	0.747	0.912619	142.1	102	91.1	8.82	2.26	3.85	8.24	10.3
	FALSE	High	[K].AIRPQIDLK.[R]	0.00011265	1.93435e-05	1	7	17	NP_008835.5	NP_008835.5 [255-263]		0	1053.64	0.998	0.269507	142.1	75.8	110	7.45	21.63	14.1	19.97	11.15
	FALSE	High	[K].AMHGELQK.[A]	0.00710885	0.000722819	1	5	11	NP_008835.5	NP_008835.5 [3068-3075]		0	913.456	0.437	0.963137	152.8	116.5	100.9	21.21	6.87	21.35	49.74	7.19
	FALSE	High	[K].APGLGAFR.[R]	0.00315195	0.00034628	2	8	15	NP_008835.5; AAA79184.1	NP_008835.5 [3622-3629]; AAA79184.1 [424-431]		0	788.441	0.835	0.820336	139.7	92.7	96.6	5.44	5.27	2.83	11.26	3.31
	FALSE	High	[R].APPCEYKDWLTK.[M]	2.25178e-05	1.93435e-05	2	8	12	NP_008835.5; AAA79184.1	NP_008835.5 [3834-3845]; AAA79184.1 [636-647]		1	1508.71	0.518	0.881337	105.9	104.2	180.3	2.4	7.37	18.98	22.08	5.09
	FALSE	High	[R].AQEPESGLSEETQVK.[C]	5.02086e-10	1.93435e-05	2	8	44	NP_008835.5; AAA79184.1	NP_008835.5 [4091-4105]; AAA79184.1 [893-907]		0	1631.78	0.916	0.758723	139.6	86	96.7	4.4	3.72	16.37	4.42	6.74
	FALSE	High	[K].ARLPPDVLR.[W]	0.0304833	0.00249232	1	5	26	NP_008835.5	NP_008835.5 [2914-2922]		1	1036.63	0.297	0.869908	102.5	154.2	116	37.1	14.94	21.31	68	60.2
	FALSE	High	[K].ATQMPEGGQGAPPMYQLYK.[R]	2.32826e-12	1.93435e-05	1	7	4	NP_008835.5	NP_008835.5 [945-963]		0	2066.97	0.01	0.765945	18.2	453.3	11.5		29.62	36.32
	FALSE	High	[R].ATQQQHDFTLTQTADGR.[S]	7.44393e-12	1.93435e-05	1	5	32	NP_008835.5	NP_008835.5 [2637-2653]		0	1917.9	0.823	0.652598	154	83.2	95.6	2.63	7.56	6.24	8.3	6.71
	FALSE	High	[K].AVAFFLESIAMHDIIAAEK.[C]	1.15802e-06	1.93435e-05	1	6	7	NP_008835.5	NP_008835.5 [1293-1311]		0	2092.08	0.975	0.180099	197.1	58.6	53.8	47.86	19.17	21.03	13.61	35.09
	FALSE	High	[R].AYVPALQMAFK.[L]	5.84607e-05	1.93435e-05	1	7	7	NP_008835.5	NP_008835.5 [747-757]		0	1238.66	1.395	0.88325	119.6	79.8	77.3	4.78	85.01	2.64	11.61	5.02
	FALSE	High	[K].CDSWWAK.[D]	0.0202135	0.00164369	1	6	21	NP_008835.5	NP_008835.5 [1629-1635]		0	953.382	0.735	0.914676	148.3	103.7	95.9	6.33	4.22	4.2	4.27	4.7
	FALSE	Medium	[R].CFFLSK.[I]	0.258166	0.0180918	1	5	19	NP_008835.5	NP_008835.5 [3187-3192]		0	802.38	0.639	0.964593	130	100.1	118.7	21.1	1.44	2.29	9.36	2.46
	FALSE	High	[K].CFGTGAAGNR.[T]	0.00151046	0.000154191	1	6	23	NP_008835.5	NP_008835.5 [1312-1321]		0	1011.43	1.105	0.792434	155.1	72.8	104.1	15.73	21.71	20.61	27.45	10.93
	FALSE	High	[R].CGAALAGHQLIR.[G]	8.83845e-06	1.93435e-05	1	7	7	NP_008835.5	NP_008835.5 [25-36]		0	1267.66	1.68	0.508307	128.6	66.6	223.4	74.05		22.91	46.84	48.49
	FALSE	High	[K].CKIPALDLLIK.[L]	3.09031e-05	1.93435e-05	1	7	3	NP_008835.5	NP_008835.5 [123-133]		1	1284.76	0.722	0.985263	124.3	103.3	120.1	8.08	5.37	4.75	15.75	3.59
	FALSE	High	[K].CLMDQATDPNILGR.[T]	3.10889e-08	1.93435e-05	2	8	13	NP_008835.5; AAA79184.1	NP_008835.5 [4106-4119]; AAA79184.1 [908-921]		0	1604.74	0.825	0.953583	125.6	100.6	106.6	6.64	8	3	7.61	4.36
	FALSE	High	[K].CLMDQATDPNILGR.[T]	6.56064e-05	1.93435e-05	2	8	1	NP_008835.5; AAA79184.1	NP_008835.5 [4106-4119]; AAA79184.1 [908-921]		0	1620.74	0.7	0.60943	175.9	52.9	90.3	21.5	25.96	43.12	36.19	29.76
	FALSE	Medium	[K].CTVVVR.[I]	0.317517	0.0227663	1	6	14	NP_008835.5	NP_008835.5 [1335-1340]		0	734.387	1.018	0.295356	169.1	72.4	91.7	7.57	21.97	25.09	10.26	2.75
	FALSE	High	[K].DCLSIPYR.[L]	0.0348133	0.00285738	1	5	7	NP_008835.5	NP_008835.5 [2247-2254]		0	1024.48	0.85	0.880931	162.3	102.4	49.8	11.68	7.38	4.37	35.62	6.36
	FALSE	High	[R].DDWLVSWVQSYCR.[L]	2.06535e-06	1.93435e-05	2	7	4	NP_008835.5; AAA79184.1	NP_008835.5 [3270-3282]; AAA79184.1 [72-84]		0	1714.75	0.01	0.620395	231.8	98.8	76.2		5.42	10.31	16.57	35.08
	FALSE	Medium	[K].DEVLANR.[L]	0.314806	0.0224773	1	5	3	NP_008835.5	NP_008835.5 [2208-2214]		0	816.421	1.317	0.973563	94.7	99.2	76.8	27.61	19.01	14.96	24.37	5.79
	FALSE	High	[R].DFGLLVFVR.[K]	0.00109404	0.000154191	1	5	15	NP_008835.5	NP_008835.5 [62-70]		0	1065.61	0.393	0.956666	111.3	115.6	173.1	21.69	4.94	9.27	18.92	11.73
	FALSE	High	[K].DFSAFINLVEFCR.[E]	3.89886e-08	1.93435e-05	1	7	3	NP_008835.5	NP_008835.5 [619-631]		0	1618.76	0.545	0.974952	153.1	130.1	68.7	25.39	13.73	17.63	56.46	13.03
	FALSE	Medium	[K].DFVQVMR.[H]	0.18746	0.012966	1	5	7	NP_008835.5	NP_008835.5 [2419-2425]		0	894.45	0.733	0.938268	148	104.8	81.9	10.38	3.69	1.81	18.61	9.56
	FALSE	High	[K].DLCNTHLMR.[V]	3.50377e-05	1.93435e-05	1	6	18	NP_008835.5	NP_008835.5 [1362-1370]		0	1160.52	0.973	0.587025	162.8	85.6	89.6	11.11	4.95	6.45	12.07	8
	FALSE	High	[K].DILETHLR.[E]	0.0100401	0.000875016	1	6	18	NP_008835.5	NP_008835.5 [1413-1420]		0	996.547	0.67	0.960732	127.1	103.1	116.4	7.13	14.4	20.06	17.39	5.97
	FALSE	High	[K].DLLLNTMSQEEK.[A]	4.32685e-06	1.93435e-05	1	4	15	NP_008835.5	NP_008835.5 [3814-3825]		0	1420.7	1.129	0.461899	141.5	74.4	103	10.02	4.4	4.86	8.77	1.08
	FALSE	High	[K].DILPCLDGYLK.[T]	0.000135509	1.93435e-05	1	7	10	NP_008835.5	NP_008835.5 [791-801]		0	1307.66	100	6.09287e-17	255.5
	FALSE	Medium	[R].DLPSWMK.[F]	0.194918	0.0134616	1	6	16	NP_008835.5	NP_008835.5 [2121-2127]		0	876.428	0.752	0.931804	132.2	98.5	107.5	1.22	4.3	9.63	10.39	1.45
	FALSE	High	[R].DPESETDNDSQEIFK.[L]	3.78101e-11	1.93435e-05	1	5	9	NP_008835.5	NP_008835.5 [2486-2500]		0	1753.74	1.103	0.940684	123.1	94.5	72.4	11.3	3.06	2.13	11.57	4.85
	FALSE	High	[R].DPTVHDDVLELEMDELNR.[H]	2.70398e-10	1.93435e-05	1	6	9	NP_008835.5	NP_008835.5 [2073-2090]		0	2139.99	0.694	0.896528	158.5	103	67.4	33.77	23.14	12.75	11.16	17.63
	FALSE	High	[R].DPTVHDDVLELEMDELNR.[H]	2.25183e-11	1.93435e-05	1	6	4	NP_008835.5	NP_008835.5 [2073-2090]		0	2155.98	2.833	0.739572	29.4	85.4	55.9	78.05	66.09	108.87	21.71	36.89
	FALSE	High	[R].DQNILLGTTYR.[I]	4.45862e-05	1.93435e-05	2	7	10	NP_008835.5; AAA79184.1	NP_008835.5 [3325-3335]; AAA79184.1 [127-137]		0	1293.68	0.83	0.995274	128.7	102.9	110.7	14.05	8.08	7.78	16.96	23.01
	FALSE	High	[K].DSKPPGNLK.[E]	0.00812953	0.000755527	2	8	6	NP_008835.5; AAA79184.1	NP_008835.5 [3673-3681]; AAA79184.1 [475-483]		0	955.521	0.169	0.585509	121.6	223.7	56.4	135.62	34.24	13.46	30.49	30.98
	FALSE	High	[K].DVDFMYVELIQR.[C]	4.01252e-05	1.93435e-05	1	7	1	NP_008835.5	NP_008835.5 [380-391]		0	1527.75	0.088	4.15434e-08	292.5	17.9	18.6		14.12	17.54	40.13	11.71
	FALSE	High	[K].DVDFMYVELIQR.[C]	1.402e-06	1.93435e-05	1	7	6	NP_008835.5	NP_008835.5 [380-391]		0	1543.75	0.01	0.00854461	55.4	153.4	187.1		39.98	27.67	53.25	53.3
	FALSE	High	[K].DVLIQGLIDENPGLQLIIR.[N]	2.04002e-10	1.93435e-05	1	5	15	NP_008835.5	NP_008835.5 [2504-2522]		0	2119.21	0.781	0.962435	127.2	102.5	95.6	3.31	3.9	12.64	7.52	7.3
	FALSE	Medium	[K].DWSNDVR.[A]	0.268832	0.0188474	2	8	17	NP_008835.5; AAA79184.1	NP_008835.5 [3587-3593]; AAA79184.1 [389-395]		0	891.396	0.921	0.74853	152	87.6	88.8	3.24	3.78	4.7	10.47	9.27
	FALSE	Medium	[R].DYVAVAR.[G]	0.32299	0.0232131	2	8	2	NP_008835.5; AAA79184.1	NP_008835.5 [4076-4082]; AAA79184.1 [878-884]		0	793.42	0.676	0.957985	146.3	111.7	88.8	16.39	13.11	0.78	20.16	11.11
	FALSE	Medium	[K].DYVDLFR.[H]	0.239987	0.0166368	1	7	9	NP_008835.5	NP_008835.5 [526-532]		0	927.457	0.454	0.979556	131.4	121.3	139.3	18.97	7.93	4.66	14.3	8.02
	FALSE	High	[K].ECSPWMSDFK.[V]	0.00114327	0.000154191	2	8	10	NP_008835.5; AAA79184.1	NP_008835.5 [3682-3691]; AAA79184.1 [484-493]		0	1287.5	0.67	0.962921	139.3	112	81.7	8.4	9.33	11.76	5.37	4.41
	FALSE	High	[R].EHPFLVK.[G]	0.0510393	0.00409808	2	8	20	NP_008835.5; AAA79184.1	NP_008835.5 [3747-3753]; AAA79184.1 [549-555]		0	869.488	1.553	0.0336518	175.3	49.4	81.5	29.04	7.32	16.54	5.03	19.65
	FALSE	High	[R].EIFNFVLK.[A]	0.0349993	0.00285738	1	7	9	NP_008835.5	NP_008835.5 [247-254]		0	1009.57	0.705	0.94443	131.4	97.6	114.7	2.52	2.1	5.3	6.29	1.25
	FALSE	High	[R].ELLNPVVEFVSHPSTTCR.[E]	1.08219e-10	1.93435e-05	1	5	13	NP_008835.5	NP_008835.5 [2453-2470]		0	2086.03	0.919	0.696153	138.4	84.6	104.7	5.71	3.67	17.25	15.77	12.64
[truncated: 97,399 more rows]
