# Supplementary material for: Metabolic clogging of mannose triggers dNTP loss and genomic instability in human cancer cells
Source: eLife. 2023 Jul 18;12:e83870. doi: 10.7554/eLife.83870 (PMC10353863; doi:10.7554/eLife.83870)
Supplement: Source data 2. [file elife-83870-data2.xlsx]

## Sheet: 1 day
		Count	P value	Benjamini	-log10
hsa04350:TGF-beta signaling pathway	1	3	0.0241813	1	1.61652
hsa05134:Legionellosis	2	3	0.0462179	1	1.33519
hsa03040:Spliceosome	3	4	0.0586788	1	1.23152
hsa03010:Ribosome	4	4	0.069729	1	1.15659
hsa04141:Protein processing in endoplasmic reticulum	5	4	0.0839153	1	1.07616
Category	Term	Count	%	PValue	Genes	List Total	Pop Hits	Pop Total	Fold Enrichment	Bonferroni	Benjamini	FDR
KEGG_PATHWAY	hsa04350:TGF-beta signaling pathway	3	6.25	0.0241813	4052, 1874, 5515	22	94	8112	11.7679	0.892207	1	1
ID	Gene Name	Species
1874	E2F transcription factor 4(E2F4)	Homo sapiens
4052	latent transforming growth factor beta binding protein 1(LTBP1)	Homo sapiens
5515	protein phosphatase 2 catalytic subunit alpha(PPP2CA)	Homo sapiens
Category	Term	Count	%	PValue	Genes	List Total	Pop Hits	Pop Total	Fold Enrichment	Bonferroni	Benjamini	FDR
KEGG_PATHWAY	hsa05134:Legionellosis	3	3.22581	0.0462179	3303, 3312, 1915	50	57	8112	8.53895	0.994246	1	1
ID	Gene Name	Species
1915	eukaryotic translation elongation factor 1 alpha 1(EEF1A1)	Homo sapiens
3303	heat shock protein family A (Hsp70) member 1A(HSPA1A)	Homo sapiens
3312	heat shock protein family A (Hsp70) member 8(HSPA8)	Homo sapiens
KEGG_PATHWAY	hsa03040:Spliceosome	4	4.30108	0.0586788	3190, 3303, 3312, 9879	50	147	8112	4.41469	0.998628	1	1
ID	Gene Name	Species
9879	DEAD-box helicase 46(DDX46)	Homo sapiens
3303	heat shock protein family A (Hsp70) member 1A(HSPA1A)	Homo sapiens
3312	heat shock protein family A (Hsp70) member 8(HSPA8)	Homo sapiens
3190	heterogeneous nuclear ribonucleoprotein K(HNRNPK)	Homo sapiens
KEGG_PATHWAY	hsa03010:Ribosome	4	4.30108	0.069729	9553, 6233, 6169, 100529097	50	158	8112	4.10734	0.999621	1	1
ID	Gene Name	Species
100529097	RPL36A-HNRNPH2 readthrough(RPL36A-HNRNPH2)	Homo sapiens
9553	mitochondrial ribosomal protein L33(MRPL33)	Homo sapiens
6169	ribosomal protein L38(RPL38)	Homo sapiens
6233	ribosomal protein S27a(RPS27A)	Homo sapiens
KEGG_PATHWAY	hsa04141:Protein processing in endoplasmic reticulum	4	4.30108	0.0839153	56886, 64374, 3303, 3312	50	171	8112	3.79509	0.999929	1	1
ID	Gene Name	Species
64374	SIL1 nucleotide exchange factor(SIL1)	Homo sapiens
56886	UDP-glucose glycoprotein glucosyltransferase 1(UGGT1)	Homo sapiens
3303	heat shock protein family A (Hsp70) member 1A(HSPA1A)	Homo sapiens
3312	heat shock protein family A (Hsp70) member 8(HSPA8)	Homo sapiens

## Sheet: 2 days
		Count	P value	Benjamini	-log10
hsa04216:Ferroptosis	1	3	0.00866996	0.665084	2.06198
hsa04217:Necroptosis	2	4	0.0169046	0.665084	1.77199
hsa04978:Mineral absorption	3	3	0.0179752	0.665084	1.74533
hsa04115:p53 signaling pathway	4	3	0.025965	0.720529	1.58561
hsa03030:DNA replication	5	4	0.00179749	0.191274	2.74533
hsa03010:Ribosome	6	6	0.00417688	0.38976	2.37915
hsa04110:Cell cycle	7	5	0.0102782	0.704504	1.98808
hsa05171:Coronavirus disease - COVID-19	8	6	0.019968	0.907456	1.69967
hsa04512:ECM-receptor interaction	9	4	0.0215757	0.923755	1.66603
hsa03020:RNA polymerase	10	3	0.0220431	0.927934	1.65673
hsa05134:Legionellosis	11	3	0.0568344	0.998997	1.24539
hsa04612:Antigen processing and presentation	12	3	0.0978474	0.999995	1.00945
Category	Term	Count	%	PValue	Genes	List Total	Pop Hits	Pop Total	Fold Enrichment	Bonferroni	Benjamini	FDR		Category	Term	Count	%	PValue	Genes	List Total	Pop Hits	Pop Total	Fold Enrichment	Bonferroni	Benjamini	FDR
KEGG_PATHWAY	hsa04216:Ferroptosis	3	5.55556	0.00866996	2512, 7018, 2495	29	41	8112	20.4676	0.619611	0.665084	0.665084		KEGG_PATHWAY	hsa03030:DNA replication	4	3.66972	0.00179749	4173, 4175, 4176, 4171	56	36	8112	16.0952	0.191274	0.212104	0.212104
ID	Gene Name	Species												ID	Gene Name	Species
2495	ferritin heavy chain 1(FTH1)	Homo sapiens												4171	minichromosome maintenance complex component 2(MCM2)	Homo sapiens
2512	ferritin light chain(FTL)	Homo sapiens												4173	minichromosome maintenance complex component 4(MCM4)	Homo sapiens
7018	transferrin(TF)	Homo sapiens												4175	minichromosome maintenance complex component 6(MCM6)	Homo sapiens
														4176	minichromosome maintenance complex component 7(MCM7)	Homo sapiens
KEGG_PATHWAY	hsa04217:Necroptosis	4	7.40741	0.0169046	2512, 91782, 2495, 817	29	159	8112	7.03709	0.849299	0.665084	0.665084
ID	Gene Name	Species												KEGG_PATHWAY	hsa03010:Ribosome	6	5.50459	0.00417688	200916, 6154, 7311, 6169, 100529097, 11224	56	158	8112	5.5009	0.38976	0.246436	0.246436
817	calcium/calmodulin dependent protein kinase II delta(CAMK2D)	Homo sapiens												ID	Gene Name	Species
91782	charged multivesicular body protein 7(CHMP7)	Homo sapiens												100529097	RPL36A-HNRNPH2 readthrough(RPL36A-HNRNPH2)	Homo sapiens
2495	ferritin heavy chain 1(FTH1)	Homo sapiens												200916	ribosomal protein L22 like 1(RPL22L1)	Homo sapiens
2512	ferritin light chain(FTL)	Homo sapiens												6154	ribosomal protein L26(RPL26)	Homo sapiens
														11224	ribosomal protein L35(RPL35)	Homo sapiens
KEGG_PATHWAY	hsa04978:Mineral absorption	3	5.55556	0.0179752	2512, 7018, 2495	29	60	8112	13.9862	0.866466	0.665084	0.665084		6169	ribosomal protein L38(RPL38)	Homo sapiens
ID	Gene Name	Species												7311	ubiquitin A-52 residue ribosomal protein fusion product 1(UBA52)	Homo sapiens
2495	ferritin heavy chain 1(FTH1)	Homo sapiens
2512	ferritin light chain(FTL)	Homo sapiens												KEGG_PATHWAY	hsa04110:Cell cycle	5	4.58716	0.0102782	4173, 991, 4175, 4176, 4171	56	126	8112	5.7483	0.704504	0.404274	0.404274
7018	transferrin(TF)	Homo sapiens												ID	Gene Name	Species
														991	cell division cycle 20(CDC20)	Homo sapiens
KEGG_PATHWAY	hsa04115:p53 signaling pathway	3	5.55556	0.025965	92344, 50484, 84883	29	73	8112	11.4955	0.946077	0.720529	0.720529		4171	minichromosome maintenance complex component 2(MCM2)	Homo sapiens
ID	Gene Name	Species												4173	minichromosome maintenance complex component 4(MCM4)	Homo sapiens
84883	apoptosis inducing factor mitochondria associated 2(AIFM2)	Homo sapiens												4175	minichromosome maintenance complex component 6(MCM6)	Homo sapiens
92344	golgin, RAB6 interacting(GORAB)	Homo sapiens												4176	minichromosome maintenance complex component 7(MCM7)	Homo sapiens
50484	ribonucleotide reductase regulatory TP53 inducible subunit M2B(RRM2B)	Homo sapiens
														KEGG_PATHWAY	hsa05171:Coronavirus disease - COVID-19	6	5.50459	0.019968	200916, 6154, 7311, 6169, 100529097, 11224	56	232	8112	3.74631	0.907456	0.433514	0.433514
														ID	Gene Name	Species
														100529097	RPL36A-HNRNPH2 readthrough(RPL36A-HNRNPH2)	Homo sapiens
														200916	ribosomal protein L22 like 1(RPL22L1)	Homo sapiens
														6154	ribosomal protein L26(RPL26)	Homo sapiens
														11224	ribosomal protein L35(RPL35)	Homo sapiens
														6169	ribosomal protein L38(RPL38)	Homo sapiens
														7311	ubiquitin A-52 residue ribosomal protein fusion product 1(UBA52)	Homo sapiens
														KEGG_PATHWAY	hsa04512:ECM-receptor interaction	4	3.66972	0.0215757	7057, 1284, 1282, 6382	56	88	8112	6.58442	0.923755	0.433514	0.433514
														ID	Gene Name	Species
														1282	collagen type IV alpha 1 chain(COL4A1)	Homo sapiens
														1284	collagen type IV alpha 2 chain(COL4A2)	Homo sapiens
														6382	syndecan 1(SDC1)	Homo sapiens
														7057	thrombospondin 1(THBS1)	Homo sapiens
														KEGG_PATHWAY	hsa03020:RNA polymerase	3	2.75229	0.0220431	30834, 246721, 548644	56	34	8112	12.7815	0.927934	0.433514	0.433514
														ID	Gene Name	Species
														30834	RNA polymerase I subunit H(POLR1H)	Homo sapiens
														246721	RNA polymerase II subunit J2(POLR2J2)	Homo sapiens
														548644	RNA polymerase II subunit J3(POLR2J3)	Homo sapiens
														KEGG_PATHWAY	hsa05134:Legionellosis	3	2.75229	0.0568344	3303, 3312, 1915	56	57	8112	7.62406	0.998997	0.958065	0.958065
														ID	Gene Name	Species
														1915	eukaryotic translation elongation factor 1 alpha 1(EEF1A1)	Homo sapiens
														3303	heat shock protein family A (Hsp70) member 1A(HSPA1A)	Homo sapiens
														3312	heat shock protein family A (Hsp70) member 8(HSPA8)	Homo sapiens
														KEGG_PATHWAY	hsa04612:Antigen processing and presentation	3	2.75229	0.0978474	3303, 1520, 3312	56	78	8112	5.57143	0.999995	1	1
														ID	Gene Name	Species
														1520	cathepsin S(CTSS)	Homo sapiens
														3303	heat shock protein family A (Hsp70) member 1A(HSPA1A)	Homo sapiens
														3312	heat shock protein family A (Hsp70) member 8(HSPA8)	Homo sapiens

## Sheet: 6 days
		Count	P value	Benjamini	-log10
hsa04610:Complement and coagulation cascades	1	7	4.66805e-05	0.00672199	4.33086
hsa04137:Mitophagy - animal	2	6	0.00022555	0.0162396	3.64676
hsa04216:Ferroptosis	3	4	0.00385689	0.185131	2.41376
hsa04979:Cholesterol metabolism	4	4	0.00674913	0.220356	2.17075
hsa04217:Necroptosis	5	6	0.00765124	0.220356	2.11627
hsa04142:Lysosome	6	5	0.0190515	0.457236	1.72007
hsa05131:Shigellosis	7	6	0.0422625	0.8694	1.37404
hsa04978:Mineral absorption	8	3	0.0788647	1	1.10312
hsa00190:Oxidative phosphorylation	9	4	0.0856701	1	1.06717
hsa04110:Cell cycle	13	9	4.31246e-07	4.57121e-05	6.36527
hsa03030:DNA replication	14	6	1.55068e-06	8.21862e-05	5.80948
hsa03010:Ribosome	15	5	0.0119819	0.42336	1.92147
hsa00240:Pyrimidine metabolism	16	3	0.0412208	0.736654	1.38488
hsa05134:Legionellosis	17	3	0.0412208	0.736654	1.38488
hsa05171:Coronavirus disease - COVID-19	18	5	0.0416974	0.736654	1.37989
hsa04612:Antigen processing and presentation	19	3	0.072012	0.997005	1.14259
hsa00983:Drug metabolism - other enzymes	20	3	0.0752456	0.997005	1.12352
Category	Term	Count	%	PValue	Genes	List Total	Pop Hits	Pop Total	Fold Enrichment	Bonferroni	Benjamini	FDR		Category	Term	Count	%	PValue	Genes	List Total	Pop Hits	Pop Total	Fold Enrichment	Bonferroni	Benjamini	FDR
KEGG_PATHWAY	hsa04610:Complement and coagulation cascades	7	6.19469	4.66805e-05	462, 2, 5055, 720, 966, 5327, 718	64	85	8112	10.4382	0.0066996	0.00672199	0.00662863		KEGG_PATHWAY	hsa04110:Cell cycle	9	8.18182	4.31246e-07	4172, 4085, 4173, 991, 4174, 25, 4175, 4176, 4171	47	126	8112	12.3283	4.57111e-05	4.57121e-05	4.57121e-05
ID	Gene Name	Species												ID	Gene Name	Species
966	CD59 molecule (CD59 blood group)(CD59)	Homo sapiens												25	ABL proto-oncogene 1, non-receptor tyrosine kinase(ABL1)	Homo sapiens
2	alpha-2-macroglobulin(A2M)	Homo sapiens												991	cell division cycle 20(CDC20)	Homo sapiens
718	complement C3(C3)	Homo sapiens												4171	minichromosome maintenance complex component 2(MCM2)	Homo sapiens
720	complement C4A (Rodgers blood group)(C4A)	Homo sapiens												4172	minichromosome maintenance complex component 3(MCM3)	Homo sapiens
5327	plasminogen activator, tissue type(PLAT)	Homo sapiens												4173	minichromosome maintenance complex component 4(MCM4)	Homo sapiens
5055	serpin family B member 2(SERPINB2)	Homo sapiens												4174	minichromosome maintenance complex component 5(MCM5)	Homo sapiens
462	serpin family C member 1(SERPINC1)	Homo sapiens												4175	minichromosome maintenance complex component 6(MCM6)	Homo sapiens
														4176	minichromosome maintenance complex component 7(MCM7)	Homo sapiens
														4085	mitotic arrest deficient 2 like 1(MAD2L1)	Homo sapiens
KEGG_PATHWAY	hsa04137:Mitophagy - animal	6	5.30973	0.00022555	664, 4077, 643246, 8887, 10133, 8878	64	72	8112	10.5625	0.031961	0.0162396	0.0160141
ID	Gene Name	Species												KEGG_PATHWAY	hsa03030:DNA replication	6	5.45455	1.55068e-06	4172, 4173, 4174, 4175, 4176, 4171	47	36	8112	28.766	0.000164359	8.21862e-05	8.21862e-05
664	BCL2 interacting protein 3(BNIP3)	Homo sapiens												ID	Gene Name	Species
4077	NBR1 autophagy cargo receptor(NBR1)	Homo sapiens												4171	minichromosome maintenance complex component 2(MCM2)	Homo sapiens
8887	Tax1 binding protein 1(TAX1BP1)	Homo sapiens												4172	minichromosome maintenance complex component 3(MCM3)	Homo sapiens
643246	microtubule associated protein 1 light chain 3 beta 2(MAP1LC3B2)	Homo sapiens												4173	minichromosome maintenance complex component 4(MCM4)	Homo sapiens
10133	optineurin(OPTN)	Homo sapiens												4174	minichromosome maintenance complex component 5(MCM5)	Homo sapiens
8878	sequestosome 1(SQSTM1)	Homo sapiens												4175	minichromosome maintenance complex component 6(MCM6)	Homo sapiens
														4176	minichromosome maintenance complex component 7(MCM7)	Homo sapiens
KEGG_PATHWAY	hsa04216:Ferroptosis	4	3.53982	0.00385689	2512, 643246, 7018, 2495	64	41	8112	12.3659	0.426769	0.185131	0.182559
ID	Gene Name	Species
2495	ferritin heavy chain 1(FTH1)	Homo sapiens												KEGG_PATHWAY	hsa03010:Ribosome	5	4.54545	0.0119819	200916, 6154, 6125, 100529097, 11224	47	158	8112	5.46189	0.721336	0.42336	0.42336
2512	ferritin light chain(FTL)	Homo sapiens												ID	Gene Name	Species
643246	microtubule associated protein 1 light chain 3 beta 2(MAP1LC3B2)	Homo sapiens												100529097	RPL36A-HNRNPH2 readthrough(RPL36A-HNRNPH2)	Homo sapiens
7018	transferrin(TF)	Homo sapiens												200916	ribosomal protein L22 like 1(RPL22L1)	Homo sapiens
														6154	ribosomal protein L26(RPL26)	Homo sapiens
														11224	ribosomal protein L35(RPL35)	Homo sapiens
KEGG_PATHWAY	hsa04979:Cholesterol metabolism	4	3.53982	0.00674913	335, 4035, 338, 4864	64	50	8112	10.14	0.622871	0.220356	0.217295		6125	ribosomal protein L5(RPL5)	Homo sapiens
ID	Gene Name	Species
4035	LDL receptor related protein 1(LRP1)	Homo sapiens												KEGG_PATHWAY	hsa05134:Legionellosis	3	2.72727	0.0412208	3303, 3312, 1915	47	57	8112	9.08399	0.988461	0.736654	0.736654
4864	NPC intracellular cholesterol transporter 1(NPC1)	Homo sapiens												ID	Gene Name	Species
335	apolipoprotein A1(APOA1)	Homo sapiens												1915	eukaryotic translation elongation factor 1 alpha 1(EEF1A1)	Homo sapiens
338	apolipoprotein B(APOB)	Homo sapiens												3303	heat shock protein family A (Hsp70) member 1A(HSPA1A)	Homo sapiens
														3312	heat shock protein family A (Hsp70) member 8(HSPA8)	Homo sapiens
KEGG_PATHWAY	hsa04217:Necroptosis	6	5.30973	0.00765124	2512, 3718, 55072, 2495, 8878, 817	64	159	8112	4.78302	0.669125	0.220356	0.217295		KEGG_PATHWAY	hsa00240:Pyrimidine metabolism	3	2.72727	0.0412208	6240, 1854, 7083	47	57	8112	9.08399	0.988461	0.736654	0.736654
ID	Gene Name	Species												ID	Gene Name	Species
3718	Janus kinase 3(JAK3)	Homo sapiens												1854	deoxyuridine triphosphatase(DUT)	Homo sapiens
817	calcium/calmodulin dependent protein kinase II delta(CAMK2D)	Homo sapiens												6240	ribonucleotide reductase catalytic subunit M1(RRM1)	Homo sapiens
2495	ferritin heavy chain 1(FTH1)	Homo sapiens												7083	thymidine kinase 1(TK1)	Homo sapiens
2512	ferritin light chain(FTL)	Homo sapiens
55072	ring finger protein 31(RNF31)	Homo sapiens												KEGG_PATHWAY	hsa05171:Coronavirus disease - COVID-19	5	4.54545	0.0416974	200916, 6154, 6125, 100529097, 11224	47	232	8112	3.71974	0.989053	0.736654	0.736654
8878	sequestosome 1(SQSTM1)	Homo sapiens												ID	Gene Name	Species
														100529097	RPL36A-HNRNPH2 readthrough(RPL36A-HNRNPH2)	Homo sapiens
														200916	ribosomal protein L22 like 1(RPL22L1)	Homo sapiens
KEGG_PATHWAY	hsa04142:Lysosome	5	4.42478	0.0190515	9741, 5660, 1200, 4864, 967	64	132	8112	4.80114	0.937331	0.457236	0.450885		6154	ribosomal protein L26(RPL26)	Homo sapiens
ID	Gene Name	Species												11224	ribosomal protein L35(RPL35)	Homo sapiens
967	CD63 molecule(CD63)	Homo sapiens												6125	ribosomal protein L5(RPL5)	Homo sapiens
4864	NPC intracellular cholesterol transporter 1(NPC1)	Homo sapiens
9741	lysosomal protein transmembrane 4 alpha(LAPTM4A)	Homo sapiens												KEGG_PATHWAY	hsa04612:Antigen processing and presentation	3	2.72727	0.072012	3106, 3303, 3312	47	78	8112	6.6383	0.999637	0.997005	0.997005
5660	prosaposin(PSAP)	Homo sapiens												ID	Gene Name	Species
1200	tripeptidyl peptidase 1(TPP1)	Homo sapiens												3303	heat shock protein family A (Hsp70) member 1A(HSPA1A)	Homo sapiens
														3312	heat shock protein family A (Hsp70) member 8(HSPA8)	Homo sapiens
														3106	major histocompatibility complex, class I, B(HLA-B)	Homo sapiens
KEGG_PATHWAY	hsa05131:Shigellosis	6	5.30973	0.0422625	10318, 664, 643246, 55072, 8878, 718	64	247	8112	3.07895	0.998007	0.8694	0.857325
ID	Gene Name	Species												KEGG_PATHWAY	hsa00983:Drug metabolism - other enzymes	3	2.72727	0.0752456	6240, 1854, 7083	47	80	8112	6.47234	0.99975	0.997005	0.997005
664	BCL2 interacting protein 3(BNIP3)	Homo sapiens												ID	Gene Name	Species
10318	TNFAIP3 interacting protein 1(TNIP1)	Homo sapiens												1854	deoxyuridine triphosphatase(DUT)	Homo sapiens
718	complement C3(C3)	Homo sapiens												6240	ribonucleotide reductase catalytic subunit M1(RRM1)	Homo sapiens
643246	microtubule associated protein 1 light chain 3 beta 2(MAP1LC3B2)	Homo sapiens												7083	thymidine kinase 1(TK1)	Homo sapiens
55072	ring finger protein 31(RNF31)	Homo sapiens
8878	sequestosome 1(SQSTM1)	Homo sapiens
KEGG_PATHWAY	hsa04978:Mineral absorption	3	2.65487	0.0788647	2512, 7018, 2495	64	60	8112	6.3375	0.999993	1	0.993007
ID	Gene Name	Species
2495	ferritin heavy chain 1(FTH1)	Homo sapiens
2512	ferritin light chain(FTL)	Homo sapiens
7018	transferrin(TF)	Homo sapiens
KEGG_PATHWAY	hsa00190:Oxidative phosphorylation	4	3.53982	0.0856701	1345, 1340, 526, 529	64	134	8112	3.78358	0.999997	1	0.993007
ID	Gene Name	Species
526	ATPase H+ transporting V1 subunit B2(ATP6V1B2)	Homo sapiens
529	ATPase H+ transporting V1 subunit E1(ATP6V1E1)	Homo sapiens
1340	cytochrome c oxidase subunit 6B1(COX6B1)	Homo sapiens
1345	cytochrome c oxidase subunit 6C(COX6C)	Homo sapiens
