# Supplementary material for: Metabolic clogging of mannose triggers dNTP loss and genomic instability in human cancer cells
Source: eLife. 2023 Jul 18;12:e83870. doi: 10.7554/eLife.83870 (PMC10353863; doi:10.7554/eLife.83870)
Supplement: Source data 3. [file elife-83870-data3.xlsx]

## Sheet: Data S3
ID	Metabolite	PubChem CID	HMDB ID	Concentration (nmol/g)										Comparative Analysis
				50 mM			5 mM			50 mM		5 mM		5 mM vs 50 mM
				50 mM-1	50 mM-2	50 mM-3	5 mM-1	5 mM-2	5 mM-3	Mean	S.D.	Mean	S.D.	Ratio ¶	p-value ||
A_0006	2-Hydroxybutyric acid	440864	HMDB0000008	N.D.	N.D.	N.D.	N.D.	N.D.	N.D.	N.A.	N.A.	N.A.	N.A.	N.A.	N.A.
A_0021	2-Oxoglutaric acid	51	HMDB0000208	368.359	380.068	375.366	72.3453	88.9628	71.5963	374.598	5.89264	77.6348	9.8175	0.207248	1.1015e-05	***
A_0010	2-Oxoisovaleric acid	49	HMDB0000019	26.1794	26.8841	26.0236	16.0846	18.1781	12.9689	26.3624	0.458516	15.7439	2.62126	0.597209	0.017327	*
A_0041	2-Phosphoglyceric acid	439278	HMDB0003391	N.D.	12.878	N.D.	N.D.	N.D.	N.D.	12.878	N.A.	N.A.	N.A.	<1	N.A.
A_0007	3-Hydroxybutyric acid	441	HMDB0000011,HMDB0000357,HMDB0000442	20.1679	20.229	17.3876	N.D.	N.D.	N.D.	19.2615	1.62314	N.A.	N.A.	<1	N.A.
A_0042	3-Phosphoglyceric acid	439183	HMDB0000807	44.6658	59.9013	73.5325	N.D.	N.D.	N.D.	59.3665	14.4408	N.A.	N.A.	<1	N.A.
A_0070	6-Phosphogluconic acid	91493	HMDB0001316	24.5325	23.7133	24.4171	108.103	129.565	111.294	24.221	0.443452	116.321	11.5802	4.80249	0.0051758	**
A_0096	Acetyl CoA_divalent	444493		2.31976	N.D.	N.D.	1.40521	N.D.	N.D.	2.31976	N.A.	1.40521	N.A.	0.605756	N.A.
C_0048	Adenine	190	HMDB0000034	N.D.	1.85429	N.D.	N.D.	N.D.	N.D.	1.85429	N.A.	N.A.	N.A.	<1	N.A.
C_0128	Adenosine	60961	HMDB0000050	0.257551	0.416051	N.D.	N.D.	N.D.	N.D.	0.336801	0.112077	N.A.	N.A.	<1	N.A.
A_0099	ADP	6022	HMDB0001341	367.217	335.48	350.833	157.539	199.883	189.345	351.177	15.8712	182.255	22.0442	0.518985	0.0006902	***
C_0007	Ala	602	HMDB0000161,HMDB0001310	1746.44	1822.17	1557.45	2065.16	2325.62	2077.84	1708.69	136.336	2156.21	146.855	1.26191	0.018208	*
A_0084	AMP	6083	HMDB0000045	71.8701	78.1106	58.9619	46.5185	51.9033	48.1826	69.6475	9.7659	48.8681	2.7571	0.701649	0.057142
C_0052	Anthranilic acid	227	HMDB0001123	1.27558	1.71964	1.26832	1.19801	1.33032	1.44276	1.42118	0.258498	1.3237	0.122507	0.931407	0.59847
C_0081	Arg	6322	HMDB0000517,HMDB0003416	136.01	141.342	148.861	192.764	236.745	212.082	142.071	6.45653	213.864	22.0448	1.50533	0.022773	*
C_0039	Asn	236	HMDB0000168,HMDB0033780	136.493	138.739	122.801	457.075	526.686	466.017	132.678	8.62729	483.259	37.873	3.64236	0.0026492	**
C_0046	Asp	424	HMDB0000191,HMDB0006483	1704.47	1808.53	1765.61	4488.92	5264.87	4552.28	1759.54	52.2939	4768.69	430.872	2.71019	0.0061606	**
A_0109	ATP	5957	HMDB0000538	1999.09	1869.7	2337.07	489.661	662.293	634.38	2068.62	241.316	595.445	92.6685	0.287846	0.0040813	**
C_0024	Betaine	247	HMDB0000043	89.2999	95.5643	83.5761	104.938	107.708	96.9777	89.4801	5.99613	103.208	5.57063	1.15342	0.044176	*
C_0028	Betaine aldehyde_+H2O	249		N.D.	N.D.	N.D.	N.D.	N.D.	N.D.	N.A.	N.A.	N.A.	N.A.	N.A.	N.A.
A_0080	cAMP	6076	HMDB0000058	N.D.	N.D.	N.D.	N.D.	N.D.	N.D.	N.A.	N.A.	N.A.	N.A.	N.A.	N.A.
C_0111	Carnosine	439224	HMDB0000033	2.25935	2.605	1.45551	2.85644	2.69235	2.10479	2.10662	0.589767	2.55119	0.395206	1.21104	0.34717
A_0094	CDP	6132	HMDB0001546	35.4143	29.8137	28.0052	9.26184	12.9571	12.3643	31.0777	3.86289	11.5278	1.9846	0.370933	0.0044589	**
A_0083	cGMP	24316	HMDB0001314	N.D.	N.D.	N.D.	N.D.	N.D.	N.D.	N.A.	N.A.	N.A.	N.A.	N.A.	N.A.
C_0015	Choline	305	HMDB0000097	138.657	153.299	160.901	240.33	308.12	252.112	150.952	11.3064	266.854	36.2197	1.7678	0.022916	*
A_0035	cis-Aconitic acid	643757	HMDB0000072	79.9091	81.7903	71.7303	44.6902	51.5832	46.5707	77.8099	5.34849	47.6147	3.56312	0.611937	0.0021922	**
A_0046	Citric acid	311	HMDB0000094	1334.93	1375.92	1231.19	742.527	853.244	748.357	1314.01	74.5959	781.376	62.3078	0.594649	0.00079819	***
C_0082	Citrulline	9750	HMDB0000904	27.6366	30.9243	25.6508	49.2771	49.5866	41.9402	28.0706	2.6634	46.9346	4.32812	1.67202	0.0055439	**
A_0078	CMP	6131	HMDB0000095	13.3425	14.8934	10.5936	6.62555	11.9594	10.8655	12.9432	2.17757	9.81682	2.81732	0.758455	0.20738
A_0090	CoA_divalent	87642		43.5212	47.5112	43.4198	20.412	26.1199	23.6047	44.8174	2.33345	23.3789	2.86067	0.521648	0.00066923	***
C_0041	Creatine	586	HMDB0000064	3714.26	4026.43	3667.13	2635.16	3269.15	2825.56	3802.61	195.266	2909.96	325.312	0.765253	0.02253	*
C_0021	Creatinine	588	HMDB0000562	29.3454	29.9343	28.1941	25.779	28.5821	24.0362	29.1579	0.885108	26.1324	2.29347	0.896237	0.13729
A_0105	CTP	6176	HMDB0000082	224.974	196.68	253.846	65.0903	93.4312	78.2807	225.167	28.5834	78.9341	14.1817	0.350558	0.0045465	**
C_0030	Cys	594	HMDB0000574,HMDB0003417	92.212	38.335	187.442	96.6213	71.1685	30.4541	105.996	75.5035	66.0813	33.3756	0.623429	0.46878
C_0116	Cytidine	6175	HMDB0000089	N.D.	N.D.	N.D.	N.D.	N.D.	N.D.	N.A.	N.A.	N.A.	N.A.	N.A.	N.A.
C_0019	Cytosine	597	HMDB0000630	N.D.	N.D.	N.D.	N.D.	N.D.	N.D.	N.A.	N.A.	N.A.	N.A.	N.A.	N.A.
A_0108	dATP	15993	HMDB0001532	11.3933	10.3013	15.6563	N.D.	N.D.	N.D.	12.4503	2.82966	N.A.	N.A.	<1	N.A.
A_0103	dCTP	65091	HMDB0000998	12.3265	12.718	14.0669	N.D.	2.88134	N.D.	13.0371	0.91302	2.88134	N.A.	0.22101	N.A.
A_0031	Dihydroxyacetone phosphate	668	HMDB0001473	75.6353	148.393	151.42	17.6683	15.1494	10.2789	125.149	42.9073	14.3655	3.75656	0.114787	0.045577	*
A_0093	dTDP	164628	HMDB0001274	3.8972	N.D.	N.D.	N.D.	N.D.	N.D.	3.8972	N.A.	N.A.	N.A.	<1	N.A.
A_0077	dTMP	9700	HMDB0001227	N.D.	N.D.	N.D.	N.D.	N.D.	N.D.	N.A.	N.A.	N.A.	N.A.	N.A.	N.A.
A_0104	dTTP	64968	HMDB0001342	33.3941	31.1592	35.458	4.19768	5.88818	5.4434	33.3371	2.14994	5.17642	0.876304	0.155275	0.00050946	***
A_0052	Erythrose 4-phosphate	122357	HMDB0001321	N.D.	N.D.	N.D.	N.D.	N.D.	N.D.	N.A.	N.A.	N.A.	N.A.	N.A.	N.A.
A_0082	Fructose 1,6-diphosphate	172313	HMDB0001058	58.2678	84.8423	85.5393	11.1647	16.6139	12.7695	76.2164	15.5479	13.516	2.80022	0.177337	0.017358	*
A_0067	Fructose 6-phosphate	603	HMDB0000124	213.216	230.797	205.51	4441	4721.26	4453.34	216.508	12.9606	4538.53	158.367	20.9625	0.00041329	***
A_0009	Fumaric acid	444972	HMDB0000134	415.86	456.073	402.07	95.7786	109.502	85.7492	424.668	28.0584	97.01	11.9243	0.228437	0.00062707	***
C_0013	GABA	119	HMDB0000112	1414.38	1500.1	1416.69	655.509	745.189	652.644	1443.72	48.8388	684.447	52.6231	0.474084	5.4412e-05	***
A_0100	GDP	8977	HMDB0001201	34.6931	32.6562	39.0593	13.386	20.3585	19.631	35.4695	3.27141	17.7918	3.83287	0.501609	0.0040103	**
C_0064	Gln	738	HMDB0000641,HMDB0003423	11507.2	11539.7	11675.8	8054.26	10228.7	8790.62	11574.2	89.4591	9024.52	1105.91	0.779707	0.056486
C_0065	Glu	611	HMDB0000148,HMDB0003339	20761.2	21728.8	21127.6	17808.3	22013.5	18534	21205.9	488.508	19451.9	2247.86	0.917291	0.30778
A_0051	Gluconic acid	10690	HMDB0000625	295.213	292.548	263.388	279.381	291.035	289.583	283.716	17.6551	286.666	6.35137	1.0104	0.80619
A_0066	Glucose 1-phosphate	65533	HMDB0001586	100.71	96.1596	83.6267	N.D.	N.D.	N.D.	93.4987	8.84695	N.A.	N.A.	<1	N.A.
A_0064	Glucose 6-phosphate (+Mannose 6-phosphate)	5958	HMDB0001401	1486.56	1575.37	1419.77	23869.9	26150.8	23700.8	1493.9	78.0595	24573.9	1368.32	16.4495	0.0011325	**
C_0144	Glutathione (GSH)	124886	HMDB0000125	7686.65	7762.18	7785.73	5487.26	6355.04	5661.72	7744.85	51.7594	5834.67	459.015	0.753361	0.017694	*
C_0143	Glutathione (GSSG)_divalent	65359		194.808	490.583	230.524	182.478	256.039	143.47	305.305	161.446	193.996	57.1612	0.635415	0.35689
C_0004	Gly	750	HMDB0000123	5666.45	5710.21	4727.63	5895.63	6410.61	5518.37	5368.09	555.091	5941.54	447.887	1.10682	0.23917
A_0032	Glyceraldehyde 3-phosphate	729	HMDB0001112	48.1022	36.2452	45.9923	N.D.	N.D.	N.D.	43.4466	6.32515	N.A.	N.A.	<1	N.A.
A_0033	Glycerol 3-phosphate	439162	HMDB0000126	211.315	216.556	227.191	38.3381	40.8815	34.1921	218.354	8.08924	37.8039	3.37652	0.173131	0.00011611	***
A_0002	Glycolic acid	757	HMDB0000115	N.D.	N.D.	N.D.	N.D.	N.D.	N.D.	N.A.	N.A.	N.A.	N.A.	N.A.	N.A.
A_0001	Glyoxylic acid	760	HMDB0000119	N.D.	N.D.	N.D.	N.D.	N.D.	N.D.	N.A.	N.A.	N.A.	N.A.	N.A.	N.A.
A_0086	GMP	6804	HMDB0001397	16.1254	14.7573	12.3798	15.4254	18.6868	13.2921	14.4208	1.89536	15.8014	2.71692	1.09573	0.51478
A_0110	GTP	6830	HMDB0001273	192.964	199.223	256.157	68.4225	85.3199	85.0042	216.115	34.8188	79.5822	9.66587	0.368241	0.015533	*
C_0068	Guanine	764	HMDB0000132	N.D.	N.D.	N.D.	N.D.	N.D.	N.D.	N.A.	N.A.	N.A.	N.A.	N.A.	N.A.
C_0135	Guanosine	6802	HMDB0000133	0.906359	1.03027	0.60823	0.487855	N.D.	N.D.	0.848286	0.216929	0.487855	N.A.	0.575107	N.A.
C_0070	His	773	HMDB0000177	464.378	495.639	450.55	803.24	939.475	804.32	470.189	23.0994	849.012	78.3453	1.80568	0.0093266	**
C_0027	Homoserine	12647	HMDB0000719	N.D.	N.D.	N.D.	5.46618	5.43532	N.D.	N.A.	N.A.	5.45075	0.0218181	1<	N.A.
C_0038	Hydroxyproline	5810	HMDB0000725	90.093	93.0134	89.0559	117.229	116.669	109.357	90.7208	2.05212	114.418	4.39226	1.26122	0.00428	**
C_0049	Hypoxanthine	790	HMDB0000157	N.D.	N.D.	N.D.	N.D.	N.D.	N.D.	N.A.	N.A.	N.A.	N.A.	N.A.	N.A.
C_0043	Ile	791	HMDB0000172	1485.02	1536.68	1403.82	1862.95	2222.65	1967.11	1475.17	66.9743	2017.57	185.085	1.36768	0.025784	*
A_0085	IMP	8582	HMDB0000175	4.87156	8.11062	N.D.	N.D.	N.D.	N.D.	6.49109	2.29036	N.A.	N.A.	<1	N.A.
C_0129	Inosine	6021	HMDB0000195	N.D.	N.D.	N.D.	N.D.	N.D.	N.D.	N.A.	N.A.	N.A.	N.A.	N.A.	N.A.
A_0047	Isocitric acid	1198	HMDB0000193	95.5653	91.8509	82.5835	45.6829	45.5888	42.1428	89.9999	6.68587	44.4715	2.0173	0.494128	0.0041502	**
A_0005	Lactic acid	612	HMDB0000190,HMDB0001311	26947.6	27822.1	21895.9	1956.75	2046.35	1547.56	25555.2	3199.05	1850.22	265.908	0.0724009	0.0057473	**
C_0044	Leu	857	HMDB0000687	1340.79	1459.72	1369.02	1826.79	2234.82	1914.12	1389.84	62.144	1991.91	214.85	1.43319	0.031791	*
C_0061	Lys	866	HMDB0000182,HMDB0003405	639.911	674.96	670.459	887.878	1081.85	994.234	661.777	19.0694	987.988	97.1383	1.49293	0.024726	*
A_0018	Malic acid	525	HMDB0000156,HMDB0000744	1774.28	1833.88	1684.05	354.323	393.771	336.116	1764.07	75.4353	361.404	29.4724	0.204869	0.0002265	***
A_0097	Malonyl CoA_divalent	644066		N.D.	N.D.	N.D.	N.D.	N.D.	N.D.	N.A.	N.A.	N.A.	N.A.	N.A.	N.A.
C_0066	Met	876	HMDB0000696	326.894	332.063	334.542	606.447	751.107	677.944	331.166	3.9018	678.499	72.332	2.04882	0.013947	*
C_0012	N,N-Dimethylglycine	673	HMDB0000092	N.D.	N.D.	N.D.	N.D.	N.D.	N.D.	N.A.	N.A.	N.A.	N.A.	N.A.	N.A.
A_0114	NAD+	5893	HMDB0000902	944.992	978.951	902.125	842.642	883.673	782.077	942.023	38.499	836.131	51.1099	0.887591	0.049786	*
A_0115	NADP+	5886	HMDB0000217	13.9275	10.6781	11.1702	10.6172	9.59685	11.3594	11.9253	1.75133	10.5245	0.884939	0.882536	0.30536
C_0042	Ornithine	389	HMDB0000214,HMDB0003374	42.0185	43.8503	46.1354	90.6439	100.747	92.7544	44.0014	2.06261	94.715	5.32914	2.15255	0.0013014	**
C_0075	Phe	994	HMDB0000159	912.642	961.912	870.453	1337.85	1519.58	1338.63	915.002	45.7751	1398.69	104.7	1.52862	0.0070981	**
A_0029	Phosphoenolpyruvic acid	1005	HMDB0000263	23.5244	36.0538	36.377	N.D.	N.D.	N.D.	31.985	7.32894	N.A.	N.A.	<1	N.A.
C_0023	Pro	614	HMDB0000162,HMDB0003411	1490.69	1604.75	1303.79	1318.08	1504.82	1327.17	1466.41	151.941	1383.36	105.286	0.943363	0.48491
A_0091	PRPP	7339	HMDB0000280	23.6515	26.4107	29.2096	27.6148	38.302	34.6059	26.4239	2.7791	33.5076	5.4276	1.26808	0.13828
C_0005	Putrescine	1045	HMDB0001414	41.3936	39.9949	44.6981	22.9039	28.2403	25.5545	42.0289	2.41512	25.5662	2.6682	0.608302	0.0014306	**
A_0003	Pyruvic acid	1060	HMDB0000243	N.D.	N.D.	308.954	N.D.	N.D.	N.D.	308.954	N.A.	N.A.	N.A.	<1	N.A.
A_0060	Ribose 5-phosphate	439167	HMDB0001548	6.33329	12.3915	10.447	10.1486	11.6528	6.59172	9.72394	3.09316	9.46437	2.59897	0.973306	0.9169
A_0059	Ribulose 5-phosphate	439184	HMDB0000618	17.4979	28.9634	27.3767	24.8846	29.4321	28.049	24.6127	6.21248	27.4552	2.33119	1.11549	0.5204
C_0153	S-Adenosylmethionine	34755	HMDB0001185	71.7174	75.9776	79.496	77.0578	90.768	78.5874	75.7303	3.89518	82.1377	7.51308	1.08461	0.28099
C_0008	Sarcosine	1088	HMDB0000271	11.467	13.6488	13.7729	11.6315	10.8503	8.94239	12.9629	1.29696	10.4747	1.38333	0.808054	0.085745
A_0073	Sedoheptulose 7-phosphate	165007	HMDB0001068	31.784	35.0131	39.0906	18.1072	17.9174	17.4021	35.2959	3.66149	17.8089	0.364841	0.50456	0.01362	*
C_0016	Ser	617	HMDB0000187,HMDB0003406	898.708	901.276	1097.27	765.596	1045.45	833.268	965.75	113.903	881.438	146.013	0.912698	0.47691
C_0060	Spermidine	1102	HMDB0001257	10.4659	11.5428	12.7506	13.5946	20.872	17.2337	11.5864	1.143	17.2334	3.6387	1.48738	0.10408
C_0102	Spermine	1103	HMDB0001256	N.D.	N.D.	N.D.	N.D.	N.D.	N.D.	N.A.	N.A.	N.A.	N.A.	N.A.	N.A.
A_0011	Succinic acid	1110	HMDB0000254	129.499	153.258	115.302	45.7123	57.9387	52.1122	132.686	19.1779	51.9211	6.11547	0.391307	0.012088	*
C_0029	Thr	6288	HMDB0000167	3956.86	4133.15	3680.45	4417.74	5081.69	4446.55	3923.48	228.189	4648.66	375.29	1.18483	0.05767
C_0115	Thymidine	5789	HMDB0000273	N.D.	N.D.	N.D.	N.D.	N.D.	N.D.	N.A.	N.A.	N.A.	N.A.	N.A.	N.A.
C_0033	Thymine	1135	HMDB0000262	N.D.	N.D.	N.D.	N.D.	N.D.	N.D.	N.A.	N.A.	N.A.	N.A.	N.A.	N.A.
C_0105	Trp	1148	HMDB0000929	128.719	137.458	127.248	190.642	229.543	196.652	131.142	5.51903	205.613	20.9412	1.56787	0.019758	*
C_0087	Tyr	1153	HMDB0000158	1076.54	1139.62	990.636	1693.59	1818.8	1644.15	1068.93	74.7808	1718.85	90.0258	1.608	0.00076636	***
C_0053	Tyramine	5610	HMDB0000306	N.D.	N.D.	N.D.	N.D.	N.D.	N.D.	N.A.	N.A.	N.A.	N.A.	N.A.	N.A.
A_0095	UDP	6031	HMDB0000295	88.7888	75.6199	78.2416	37.9844	45.074	45.6853	80.8834	6.9706	42.9146	4.28055	0.530573	0.0027489	**
A_0079	UMP	6030	HMDB0000288	23.6848	20.4786	14.0432	14.3861	14.2634	16.142	19.4022	4.91009	14.9305	1.05096	0.769528	0.2527
C_0020	Uracil	1174	HMDB0000300	N.D.	N.D.	N.D.	N.D.	N.D.	N.D.	N.A.	N.A.	N.A.	N.A.	N.A.	N.A.
C_0117	Uridine	6029	HMDB0000296	N.D.	N.D.	N.D.	4.35705	N.D.	5.0978	N.A.	N.A.	4.72743	0.523795	1<	N.A.
A_0106	UTP	6133	HMDB0000285	696.029	635.379	803.262	256.998	347.307	329.094	711.557	85.0121	311.133	47.7584	0.437257	0.0048677	**
C_0026	Val	1182	HMDB0000883	1370.36	1459.98	1375.8	1727.59	2144.57	1880.74	1402.05	50.2492	1917.63	210.928	1.36774	0.045013	*
C_0006	β-Ala	239	HMDB0000056	1522.2	1637.9	1426.95	594.747	663.297	599.242	1529.02	105.638	619.095	38.3454	0.404897	0.0018661	**
C, cation mode; A, anion mode.
N.D.: Not Detected.
N.A.: Not Available.
¶ Mannose challenge/Optimal
|| Welch's t-test (*<0.05, **<0.01, ***<0.001)

## Sheet: Index
Candidates	Pathway Label
1-Methyl-4-imidazoleacetic acid	MIA
1-Methylhistamine	1-Methylhistamine
1-Methylhistidine	1-Methylhistidine
2,3-Diphosphoglyceric acid	Diphosphoglycerate
2-Aminoadipic acid	2-Aminoadipic acid
2-Aminobutyric acid	2-Aminobutyric acid
2'-Deoxyadenosine	dAdenosine
2'-Deoxycytidine	dCyt
2'-Deoxyguanosine	dGuanosine
2'-Deoxyuridine	dUri
2-Hydroxybutyric acid	2-HBA
2-Hydroxyglutaric acid	2-Hydroxyglutaric acid
2-Oxoadipic acid	2-Oxoadipic acid
2-Oxobutyric acid	2-Oxobutyric acid
2-Oxoglutaric acid	2-OG
2-Oxoisovaleric acid	2-KIV
2-Phenylethylamine	Phenylethylamine
2-Phosphoglyceric acid	2-PG
3,3',5-Triiodothyronine	T3
3,4-Dihydroxymandelic acid_-H2O	DHMA
3,4-Dihydroxyphenylacetic acid	DOPAC
3,4-Dihydroxyphenylglycol	DHPG
3,5-Diiodotyrosine	3,5-DI-Tyr
3-Aminoisobutyric acid	3-Aminoisobutyric acid
3'-Dephospho CoA	Dephospho-CoA
3-Hydroxy-3-methylglutaric acid	3-Hydroxy-3-methylglutaric acid
3-Hydroxyanthranilic acid	3-OHAA
3-Hydroxybutyric acid	3-HBA
3-Hydroxykynurenine	3-OHKY
3-Iodotyrosine	MIT
3-Methoxy-4-hydroxyphenylethyleneglycol	MHPG
3-Methoxytyramine	3-Methoxytyramine
3-Methyl-2-oxovaleric acid	2K3MVA
3-Methylcrotonyl CoA_divalent	3-Methylcrotonyl-CoA
3-Phenyllactic acid	3-Phenyllactic acid
3-Phenylpropionic acid	3-Phenylpropionic acid
3-Phosphoglyceric acid	3-PG
3-Ureidoisobutyric acid	3-Ureidoisobutyric acid
3-Ureidopropionic acid	3-Ureidopropionic acid
4-Guanidinobutyric acid	4-GBA
4-Hydroxyphenylacetaldehyde	4-Hydroxyphenylacetaldehyde
4-Methyl-2-oxovaleric acid	2-Oxoleucine
4-Methylthio-2-oxobutyric acid	KMTB
4-Pyridoxic acid	4-Pyridoxic acid
4-Trimethylammoniobutanal	4-Trimethylammoniobutanal
5,6,7,8-Tetrahydrobiopterin	5,6,7,8-Tetrahydrobiopterin
5-Amino-4-oxovaleric acid	5-ALA
5-Aminoimidazole-4-carboxamide ribotide	AICAR
5'-Deoxy-5'-methylthioadenosine	MTA
5-Hydroxyindoleacetic acid	5-Hydroxy-IAA
5-Hydroxylysine	5-Hydroxylysine
5-Hydroxytryptophan	Pretonine
5-Methoxyindoleacetic acid	5-MIAA
5-Methoxytryptamine	5MOT
5-Methyltetrahydrofolic acid	5-MTHF
5-Oxoproline	Oxoproline
6-Phosphogluconic acid	6-PG
7,8-Dihydrobiopterin	7,8-Dihydrobiopterin
7,8-Dihydrofolic acid	Dihydrofolic acid
Acetoacetic acid	Acetoacetic acid
Acetoacetyl CoA_divalent	AAcCoA
Acetyl CoA_divalent	AcCoA
Acetylcholine	Acetylcholine
Adenine	Adenine
Adenosine	Adenosine
Adenylosuccinic acid	Succinyl AMP
ADP	ADP
ADP-ribose	ADP-Rib
Adrenaline	Adrenaline
Agmatine	Agmatine
Ala	Ala
AMP	AMP
Anserine_divalent	Anserine
Anthranilic acid	Anthranilic acid
Arg	Arg
Argininosuccinic acid	ArgSuccinate
Ascorbate 2-phosphate	Ascorbate 2-phosphate
Ascorbate 2-sulfate	Ascorbate 2-sulfate
Ascorbic acid	Ascorbic acid
Asn	Asn
Asp	Asp
ATP	ATP
Betaine	Betaine
Betaine aldehyde_+H2O	BTL
Biopterin	Biopterin
Biotin	Biotin
cAMP	cAMP
Carbamoylphosphate	Carbamoyl-P
Carnitine	Carnitine
Carnosine	Carnosine
CDP	CDP
CDP-choline	CDP-choline
cGMP	cGMP
Cholic acid	Cholic acid
Choline	Choline
cis-Aconitic acid	cis-Aconitic acid
Citric acid	Citric acid
Citrulline	Citrulline
CMP	CMP
CMP-N-acetylneuraminate	CMP-NeuNAc
CoA_divalent	CoA
Creatine	Creatine
Creatinine	Creatinine
CTP	CTP
Cys	Cys
Cys-Gly	Cys-Gly
Cystathionine	Cystathionine
Cysteamine	Cysteamine
Cysteic acid	Cysteic acid
Cysteinesulfinic acid	Cysteinesulfinic acid
Cystine	Cystine
Cytidine	Cytidine
Cytosine	Cytosine
dADP	dADP
dAMP	dAMP
dATP	dATP
dCDP	dCDP
dCMP	dCMP
dCTP	dCTP
Decarboxylated S-Adenosylmethionine	dcSAM
Desthiobiotin	Desthiobiotin
dGDP	dGDP
dGMP	dGMP
dGTP	dGTP
Dihydroorotic acid	Dihydroorotic acid
Dihydrouracil	Dihydrouracil
Dihydroxyacetone phosphate	DHAP
dIMP	dIMP
dITP	dITP
DOPA	DOPA
Dopamine	Dopamine
dTDP	dTDP
dTMP	dTMP
dTTP	dTTP
dUDP	dUDP
dUMP	dUMP
dUTP	dUTP
Erythrose 4-phosphate	E4P
Ethanolamine	Ethanolamine
Ethanolamine phosphate	EAP
FAD_divalent	FAD
FMN	FMN
Folic acid	Folic acid
Formylanthranilic acid	Formylanthranilate
Fructose 1,6-diphosphate	F1,6P
Fructose 6-phosphate	F6P
Fumaric acid	Fumaric acid
GABA	GABA
GDP	GDP
GDP-fucose	GDP-fucose
GDP-mannose	GDP-Man
Gln	Gln
Glu	Glu
Glucosamine	Glucosamine
Glucosamine 6-phosphate	Glc-6P
Glucosaminic acid	Glucosaminic acid
Glucose 1-phosphate	G1P
Glucose 6-phosphate	G6P
Glucuronic acid	Glucuronic acid
Glutaryl CoA_divalent	Glutaryl-CoA
Glutathione (GSH)	GSH
Glutathione (GSSG)_divalent	GSSG
Gly	Gly
Glyceraldehyde 3-phosphate	GAP
Glycerol 3-phosphate	G3P
Glycerophosphocholine	GPCho
Glycocholic acid	Glycocholic acid
Glycolic acid	Glycolic acid
Glyoxylic acid	Glyoxylic acid
GMP	GMP
GTP	GTP
Guanidoacetic acid	Guanidoacetic acid
Guanine	Guanine
Guanosine	Guanosine
Gulonolactone	Gulonolactone
His	His
Histamine	Histamine
HMG CoA_divalent	HMG-CoA
Homocarnosine	Homocarnosine
Homocysteine	Homocysteine
Homovanillic acid	HVA
Hydroxyproline	Hydroxyproline
Hypotaurine	Hypotaurine
Hypoxanthine	Hypoxanthine
IDP	IDP
Ile	Ile
IMP	IMP
Indole-3-acetaldehyde	Indoleacetaldehyde
Indole-3-acetamide	Indole-3-acetamide
Indole-3-acetic acid	IAA
Indole-3-ethanol	Indole-3-ethanol
Indole-3-lactic Acid	Indolelactic acid
Indole-3-propionic acid	Indole-3-propionic acid
Inosine	Inosine
Isobutyryl CoA_divalent	Isobutyryl-CoA
Isocitric acid	Isocitric acid
ITP	ITP
Kynurenic acid	Kynurenic acid
Kynurenine	Kynurenine
Lactic acid	Lactic acid
Leu	Leu
Lys	Lys
Malic acid	Malic acid
Malonyl CoA_divalent	Malonyl-CoA
Melatonin	Melatonin
Met	Met
Metanephrine	Metanephrine
Methylmalonic acid	Methylmalonic acid
Mevalonic acid	Mevalonic acid
N,N-Dimethylglycine	DMG
N’-Formylkynurenine	N-Formylkynurenine
N1,N12-Diacetylspermine	N1,N12-Diacetylspermine
N1,N8-Diacetylspermidine	N1,N8-Diacetylspermidine
N1-Acetylspermidine	N1-Acetylspermidine
N1-Acetylspermine	N1-Acetylspermine
N6,N6,N6-Trimethyllysine	Trimethyllysine
N8-Acetylspermidine	N8-Acetylspermidine
N-Acetylaspartic acid	N-Acetylaspartic acid
N-Acetylglucosamine	GlcNAc
N-Acetylglucosamine 1-phosphate	GlcNAc-P
N-Acetylglucosamine 6-phosphate	NAcGlcNP
N-Acetylglutamic acid	N-AcGlu
N-Acetylmannosamine	ManNAc
N-Acetylneuraminic acid	NeuNAc
N-Acetylornithine	N-AcOrn
N-Acetylputrescine	N-Acetylputrescine
NAD+	NAD+
NADH	NADH
NADP+	NADP+
NADPH_divalent	NADPH
N-Carbamoylaspartic acid	Carbamoyl-Asp
N-Formylaspartic acid	N-Formyl aspartic acid
Nicotinamide	Nicotinamide
Nicotinamide riboside	Nicotinamide riboside
Nicotinic acid	Nicotinic acid
N-Methylnicotinamide	N-Methylnicotinamide
N-Methylserotonin	N-Methylserotonin
NMN	NicRN
Noradrenaline	Noradrenaline
Normetanephrine	Normetanephrine
N-Succinyl-5-aminoimidazole-4-carboxamide ribose 5'-phosphate_divalent	SAICAR
O-Acetylcarnitine	ALCAR
o-Hydroxyphenylacetic acid	2-HPAA
O-Phosphoserine	3PSer
Ophthalmic acid	Ophthalmic acid
Ornithine	Ornithine
Orotic acid	Orotic acid
Orotidine	Orotidine
Orotidine 5'-monophosphate	Orotidine5'P
P1, P4-Di(adenosine-5') tetraphosphate_divalent	AppppA
Pantothenic acid	Pantothenic acid
Phe	Phe
Phenylpyruvic acid	Phenylpyruvate
Phosphocreatine	Phosphocreatine
Phosphoenolpyruvic acid	PEP
Phosphorylcholine	Phosphorylcholine
p-Hydroxyphenylacetic acid	4-HPAA
p-Hydroxyphenylpyruvic acid	HPP
Picolinic acid	Picolinic acid
Porphobilinogen	Porphobilinogen
Pro	Pro
Propionyl CoA_divalent	Propanoyl-CoA
PRPP	PRPP
Putrescine	Putrescine
Pyridoxal	Pyridoxal
Pyridoxal 5-phosphate	PLP
Pyridoxamine	Pyridoxamine
Pyridoxamine 5'-phosphate	Pyridoxamine-P
Pyridoxine	Pyridoxine
Pyridoxol 5'-phosphate	Pyridoxol 5'-phosphate
Pyruvic acid	Pyruvic acid
Quinolinic acid	Quinolinic acid
Riboflavin	Riboflavin
Ribose 1-phosphate	R1P
Ribose 5-phosphate	R5P
Ribulose 5-phosphate	Ru5P
Saccharopine	Saccharopine
S-Adenosylhomocysteine	SAHC
S-Adenosylmethionine	SAM
Sarcosine	Sarcosine
Sedoheptulose 7-phosphate	S7P
Ser	Ser
Serotonin	Serotonin
Spermidine	Spermidine
Spermine	Spermine
Succinic acid	Succinic acid
Succinic semialdehyde	Succinic semialdehyde
Succinyl CoA_divalent	SucCoA
Taurine	Taurine
Taurocholic acid	Taurocholic acid
Tetrahydrofolic acid	THF
Thiamine	Thiamine
Thiamine diphosphate	ThPP
Thiamine phosphate	TMP
Thiamine triphosphate	ThTP
Thr	Thr
Threonic acid	Threonic acid
Thymidine	Thymidine
Thymine	Thymine
Trigonelline	Trigonelline
Trimethylamine	Trimethylamine
Trimethylamine N-oxide	Trimethylamine N-oxide
Trp	Trp
Tryptamine	Tryptamine
Tyr	Tyr
Tyramine	Tyramine
UDP	UDP
UDP-galactose	UDP-Gal
UDP-glucose	UDP-Glc
UDP-glucuronic acid	UDP-GlcA
UDP-N-acetylglucosamine	UDP-GlcNAc
UMP	UMP
Uracil	Uracil
Urea	Urea
Uric acid	Uric acid
Uridine	Uridine
Urocanic acid	Urocanic acid
UTP	UTP
Val	Val
Vanillylmandelic acid	VMA
Xanthine	Xanthine
Xanthosine	Xanthosine
Xanthurenic acid	Xanthurenic acid
XMP	XMP
XTP	XTP
Xylulose 5-phosphate	X5P
β-Ala	b-Ala
γ-Butyrobetaine	Actinine
γ-Glu-Cys	g-Glu-Cys
