# Supplementary material for: Metabolic clogging of mannose triggers dNTP loss and genomic instability in human cancer cells
Source: eLife. 2023 Jul 18;12:e83870. doi: 10.7554/eLife.83870 (PMC10353863; doi:10.7554/eLife.83870)
Supplement: Source data 4. [file elife-83870-data4.xlsx]

## Sheet: Results
pmol/mg
	Tube #	1	2	3	4	5	6	7	8	9	10	11	12	13	14	15	16	17	18
	Labeling time (hr)	0.5	0.5	0.5	0.5	0.5	0.5	3	3	3	3	3	3	6	6	6	6	6	6
	Mannose (uM)	50	50	50	5000	5000	5000	50	50	50	5000	5000	5000	50	50	50	5000	5000	5000
	wet cell weight (mg)	24.7	23.6	26	27	25.2	27.5	19.2	18.4	20.5	21.5	19.7	21.6	18.9	18.5	20.6	21.5	20.7	20.4
Instruments	Annotation	S1	S2	S3	S4	S5	S6	S7	S8	S9	S10	S11	S12	S13	S14	S15	S16	S17	S18
IC-QE	ååå	1.07861	1.64366	1.5258	0.00512905	N.D.	N.D.	0.67257	0.505952	0.564396	N.D.	N.D.	N.D.	0.319267	0.156174	0.0835006	N.D.	N.D.	N.D.
IC-QE	2,3-DPG (13C+1; 3.2%)	0.043021	0.0524147	0.0641165	N.D.	N.D.	N.D.	N.D.	N.D.	0.0036194	N.D.	N.D.	N.D.	0.00398315	N.D.	N.D.	N.D.	N.D.	N.D.
IC-QE	2,3-DPG (13C+2; 0%)	0.15678	0.112265	0.0681907	N.D.	N.D.	N.D.	0.0174564	N.D.	N.D.	N.D.	N.D.	N.D.	0.00509275	0.00167391	N.D.	N.D.	N.D.	N.D.
IC-QE	2,3-DPG (13C+3; 0%)	7.82499	5.16682	3.62847	0.00216568	N.D.	0.00418363	2.12048	1.17945	0.822152	0.00350738	0.00301241	N.D.	0.765373	0.35563	0.208461	0.00188919	N.D.	N.D.
IC-QE	2-Deoxyribose 1-phosphate	N.D.	N.D.	N.D.	N.D.	N.D.	N.D.	N.D.	N.D.	N.D.	N.D.	N.D.	N.D.	N.D.	N.D.	N.D.	N.D.	N.D.	N.D.
IC-QE	2-Deoxyribose 1-phosphate (13C+1; 5.4%)	N.D.	N.D.	N.D.	N.D.	N.D.	N.D.	N.D.	N.D.	N.D.	N.D.	N.D.	N.D.	N.D.	N.D.	N.D.	N.D.	N.D.	N.D.
IC-QE	2-Deoxyribose 1-phosphate (13C+2; 0.1%)	N.D.	N.D.	N.D.	N.D.	N.D.	N.D.	N.D.	N.D.	N.D.	N.D.	N.D.	N.D.	N.D.	N.D.	N.D.	N.D.	N.D.	N.D.
IC-QE	2-Deoxyribose 1-phosphate (13C+3; 0%)	N.D.	N.D.	N.D.	N.D.	N.D.	N.D.	N.D.	N.D.	N.D.	N.D.	N.D.	N.D.	N.D.	N.D.	N.D.	N.D.	N.D.	N.D.
IC-QE	2-Deoxyribose 1-phosphate (13C+4; 0%)	N.D.	N.D.	N.D.	N.D.	N.D.	N.D.	N.D.	N.D.	N.D.	N.D.	N.D.	N.D.	N.D.	N.D.	N.D.	N.D.	N.D.	N.D.
IC-QE	2-Deoxyribose 1-phosphate (13C+5; 0%)	N.D.	N.D.	N.D.	N.D.	N.D.	N.D.	N.D.	N.D.	N.D.	N.D.	N.D.	N.D.	N.D.	N.D.	N.D.	N.D.	N.D.	N.D.
IC-QE	2-Oxoglutarate	46.4271	90.7841	92.7939	54.3572	63.8295	54.7031	153.911	165.393	171.634	61.9093	61.7615	50.4425	143.913	158.992	159.275	50.3555	43.5105	43.8315
IC-QE	2-Oxoglutarate (13C+1; 5.4%)	2.47306	4.95236	5.11426	2.98597	3.51049	2.95219	9.27436	9.67935	10.5088	4.14846	4.13589	3.33723	9.43143	10.0541	10.3645	3.65308	3.16405	3.19779
IC-QE	2-Oxoglutarate (13C+2; 0.1%)	1.24994	2.49501	2.79849	1.84402	2.07607	1.75425	28.932	29.6153	34.1792	4.85956	4.70241	4.1563	39.1568	41.6102	41.6404	4.7767	4.04556	4.2399
IC-QE	2-Oxoglutarate (13C+3; 0%)	0.0109749	0.0429763	0.0535879	0.0351998	0.0461869	0.0426127	2.99813	3.02856	3.91812	0.335176	0.35332	0.308548	6.75752	7.19493	7.22615	0.443239	0.361566	0.359255
IC-QE	2-Oxoglutarate (13C+4; 0%)	N.D.	N.D.	N.D.	N.D.	N.D.	N.D.	2.70341	2.68576	3.801	0.124984	0.1051	0.102793	7.77897	8.24107	8.3089	0.170877	0.129253	0.153288
IC-QE	2-Oxoglutarate (13C+5; 0%)	N.D.	N.D.	N.D.	N.D.	N.D.	N.D.	0.630692	0.569333	0.862428	N.D.	N.D.	N.D.	2.02546	2.30555	2.26504	N.D.	N.D.	N.D.
IC-QE	2-Oxoisopentanoate	6.47379	9.59604	9.83165	10.1206	11.85	12.3319	23.644	29.6387	28.5063	12.6659	15.4291	13.0908	27.9625	38.2409	32.9082	12.2412	12.4617	13.5253
IC-QE	2-Oxoisopentanoate (13C+1; 5.4%)	0.3074	0.465794	0.464276	0.484916	0.591836	0.60186	1.13699	1.53573	1.48287	0.650443	0.786646	0.661478	1.4892	2.02235	1.75066	0.646892	0.621394	0.659834
IC-QE	2-Oxoisopentanoate (13C+2; 0.1%)	N.D.	N.D.	N.D.	N.D.	N.D.	N.D.	N.D.	N.D.	N.D.	N.D.	N.D.	N.D.	N.D.	N.D.	N.D.	N.D.	N.D.	N.D.
IC-QE	2-Oxoisopentanoate (13C+3; 0%)	N.D.	N.D.	N.D.	N.D.	N.D.	N.D.	N.D.	N.D.	N.D.	N.D.	N.D.	N.D.	N.D.	N.D.	N.D.	N.D.	N.D.	N.D.
IC-QE	2-Oxoisopentanoate (13C+4; 0%)	N.D.	N.D.	N.D.	N.D.	N.D.	N.D.	N.D.	N.D.	N.D.	N.D.	N.D.	N.D.	N.D.	N.D.	N.D.	N.D.	N.D.	N.D.
IC-QE	2-Oxoisopentanoate (13C+5; 0%)	N.D.	N.D.	N.D.	N.D.	N.D.	N.D.	N.D.	N.D.	N.D.	N.D.	N.D.	N.D.	N.D.	N.D.	N.D.	N.D.	N.D.	N.D.
IC-QE	3PG + 2PG	1.95295	1.59111	1.42617	3.2777	4.59919	3.7988	1.15489	1.41338	1.26408	4.6274	5.89273	4.09655	1.54798	1.51101	1.50727	5.16545	3.79986	3.97659
IC-QE	3PG + 2PG (13C+1; 3.2%)	0.0586403	0.0365357	0.0440961	0.0831602	0.0917613	0.0869383	0.00982165	0.0208302	0.0125833	0.0715741	0.121602	0.0736771	0.0219544	0.017034	0.0191375	0.118654	0.074751	0.0761409
IC-QE	3PG + 2PG (13C+2; 0%)	0.41633	0.194459	0.12072	0.0374476	N.D.	N.D.	N.D.	N.D.	N.D.	N.D.	N.D.	N.D.	N.D.	N.D.	N.D.	N.D.	N.D.	N.D.
IC-QE	3PG + 2PG (13C+3; 0%)	18.6308	7.45433	4.89798	2.12091	2.16708	2.00275	4.6706	4.31657	3.47041	2.00954	1.93347	1.91271	3.76497	3.33841	2.90716	1.44601	1.62302	1.47697
IC-QE	3-Ureidopropionate	N.D.	N.D.	N.D.	N.D.	N.D.	N.D.	N.D.	N.D.	N.D.	N.D.	N.D.	N.D.	N.D.	N.D.	N.D.	N.D.	N.D.	N.D.
IC-QE	3-Ureidopropionate (13C+1; 4.3%)	N.D.	N.D.	N.D.	N.D.	N.D.	N.D.	N.D.	N.D.	N.D.	N.D.	N.D.	N.D.	N.D.	N.D.	N.D.	N.D.	N.D.	N.D.
IC-QE	3-Ureidopropionate (13C+2; 0.1%)	N.D.	N.D.	N.D.	N.D.	N.D.	N.D.	N.D.	N.D.	N.D.	N.D.	N.D.	N.D.	N.D.	N.D.	N.D.	N.D.	N.D.	N.D.
IC-QE	3-Ureidopropionate (13C+3; 0%)	N.D.	N.D.	N.D.	N.D.	N.D.	N.D.	N.D.	N.D.	N.D.	N.D.	N.D.	N.D.	N.D.	N.D.	N.D.	N.D.	N.D.	N.D.
IC-QE	3-Ureidopropionate (13C+4; 0%)	N.D.	N.D.	N.D.	N.D.	N.D.	N.D.	N.D.	N.D.	N.D.	N.D.	N.D.	N.D.	N.D.	N.D.	N.D.	N.D.	N.D.	N.D.
IC-QE	6-Phosphogluconate	0.6361	0.955118	0.650673	0.289082	0.401027	0.309172	0.726324	1.05559	0.837074	0.322613	0.377545	0.322605	0.486908	0.803359	0.53971	0.290519	0.259042	0.373613
IC-QE	6-Phosphogluconate (13C+1; 6.5%)	0.0115439	0.0110329	0.0110467	N.D.	N.D.	0.00330789	N.D.	N.D.	N.D.	N.D.	N.D.	N.D.	0.0059283	N.D.	N.D.	N.D.	N.D.	N.D.
IC-QE	6-Phosphogluconate (13C+2; 0.2%)	N.D.	N.D.	N.D.	N.D.	N.D.	N.D.	N.D.	N.D.	N.D.	N.D.	N.D.	N.D.	N.D.	N.D.	N.D.	N.D.	N.D.	N.D.
IC-QE	6-Phosphogluconate (13C+3; 0%)	N.D.	N.D.	N.D.	N.D.	N.D.	N.D.	N.D.	N.D.	N.D.	N.D.	N.D.	N.D.	N.D.	N.D.	N.D.	N.D.	N.D.	N.D.
IC-QE	6-Phosphogluconate (13C+4; 0%)	N.D.	N.D.	N.D.	N.D.	N.D.	N.D.	N.D.	N.D.	N.D.	N.D.	N.D.	N.D.	N.D.	N.D.	N.D.	N.D.	N.D.	N.D.
IC-QE	6-Phosphogluconate (13C+5; 0%)	0.264287	0.209073	0.20157	0.0319611	0.0148542	0.0238566	0.22257	0.260569	0.258568	0.0234035	0.0313342	0.0124824	0.179686	0.174065	0.101863	0.00763044	0.0132483	0.0125575
IC-QE	6-Phosphogluconate (13C+6; 0%)	4.24804	3.81266	2.88994	1.31785	1.63813	1.59685	4.32308	4.33023	3.70532	1.50952	1.72305	1.65852	4.14926	3.89419	2.66653	1.16395	1.3163	1.40799
IC-QE	Adenylosuccinate	0.632259	1.82491	1.65444	0.376963	0.483461	0.443767	2.47254	3.54201	3.27918	0.220511	0.281158	0.179234	1.45002	2.00756	1.6864	0.098233	0.0921987	0.121068
IC-QE	Adenylosuccinate (13C+1; 15.1%)	0.0944954	0.244139	0.228174	0.0346861	0.0516686	0.0535588	0.393269	0.492713	0.465231	0.0176625	0.021248	0.00929272	0.256545	0.30681	0.26434	N.D.	N.D.	N.D.
IC-QE	Adenylosuccinate (13C+2; 1.1%)	0.00853254	0.0231915	0.0272468	N.D.	0.00572904	N.D.	0.360085	0.509883	0.516693	0.00248844	0.00379021	0.00600068	0.375468	0.483254	0.403567	N.D.	N.D.	N.D.
IC-QE	Adenylosuccinate (13C+3; 0%)	0.0119379	0.0326966	0.0130398	N.D.	N.D.	N.D.	0.155188	0.259205	0.244672	N.D.	N.D.	N.D.	0.194445	0.254291	0.200598	N.D.	N.D.	N.D.
IC-QE	Adenylosuccinate (13C+4; 0%)	0.0313527	0.0435565	0.0261882	N.D.	N.D.	N.D.	0.104405	0.163432	0.131405	N.D.	N.D.	N.D.	0.123478	0.149981	0.142651	N.D.	N.D.	N.D.
IC-QE	Adenylosuccinate (13C+5; 0%)	1.09192	1.57662	1.099	0.0231331	0.0242105	0.024656	2.20718	3.19027	2.88244	0.0116441	0.0153297	0.00968419	2.425	2.9835	2.74755	0.0135472	0.0207289	0.0182048
IC-QE	Adenylosuccinate (13C+6; 0%)	0.140776	0.213228	0.147647	N.D.	N.D.	N.D.	0.352109	0.544805	0.513086	N.D.	N.D.	N.D.	0.471822	0.633353	0.568689	N.D.	N.D.	N.D.
IC-QE	Adenylosuccinate (13C+7; 0%)	0.00869424	0.0164452	0.0113654	N.D.	N.D.	N.D.	0.367886	0.492972	0.464833	N.D.	N.D.	N.D.	0.676821	0.780069	0.71683	N.D.	N.D.	N.D.
IC-QE	Adenylosuccinate (13C+8; 0%)	0.00254803	0.00297236	0.000572149	N.D.	N.D.	N.D.	0.1523	0.187942	0.222557	N.D.	N.D.	N.D.	0.325177	0.412936	0.355387	N.D.	N.D.	N.D.
IC-QE	Adenylosuccinate (13C+9; 0%)	N.D.	N.D.	N.D.	N.D.	N.D.	N.D.	0.0163165	0.0348037	0.024831	N.D.	N.D.	N.D.	0.0737319	0.107593	0.101583	N.D.	N.D.	N.D.
IC-QE	Adenylosuccinate (13C+10; 0%)	N.D.	N.D.	N.D.	N.D.	N.D.	N.D.	0.00525448	0.0234448	0.0158014	N.D.	N.D.	N.D.	0.0275696	0.0292267	0.0182505	N.D.	N.D.	N.D.
IC-QE	Adenylosuccinate (13C+11; 0%)	N.D.	N.D.	N.D.	N.D.	N.D.	N.D.	N.D.	N.D.	N.D.	N.D.	N.D.	N.D.	N.D.	N.D.	N.D.	N.D.	N.D.	N.D.
IC-QE	Adenylosuccinate (13C+12; 0%)	N.D.	N.D.	N.D.	N.D.	N.D.	N.D.	N.D.	N.D.	N.D.	N.D.	N.D.	N.D.	N.D.	N.D.	N.D.	N.D.	N.D.	N.D.
IC-QE	Adenylosuccinate (13C+13; 0%)	N.D.	N.D.	N.D.	N.D.	N.D.	N.D.	N.D.	N.D.	N.D.	N.D.	N.D.	N.D.	N.D.	N.D.	N.D.	N.D.	N.D.	N.D.
IC-QE	Adenylosuccinate (13C+14; 0%)	N.D.	N.D.	N.D.	N.D.	N.D.	N.D.	N.D.	N.D.	N.D.	N.D.	N.D.	N.D.	N.D.	N.D.	N.D.	N.D.	N.D.	N.D.
IC-QE	ADP	289.752	453.84	391.918	283.122	291.021	218.665	420.12	410.131	409.163	258.701	259.553	276.878	302.618	344.426	273.995	180.333	187.62	199.745
IC-QE	ADP (13C+1; 10.8%)	30.0618	48.1075	41.3044	29.2441	30.2448	22.263	44.7472	42.8186	41.9186	25.5294	25.5021	28.5188	31.3191	35.8646	28.0911	17.0015	18.5177	18.7357
IC-QE	ADP (13C+2; 0.5%)	4.69066	7.70783	6.90021	4.3835	4.68637	3.37846	7.2761	6.7983	6.90378	4.06193	3.81791	4.02513	5.49353	6.04583	4.84905	2.74386	3.01313	2.99932
IC-QE	ADP (13C+3; 0%)	0.425813	0.851791	0.7374	0.118794	0.0773825	0.0797898	1.35953	1.31044	1.08226	0.230326	0.204853	0.230655	1.67302	1.87437	1.48255	0.444412	0.410461	0.45323
IC-QE	ADP (13C+4; 0%)	0.770192	1.43872	1.22067	N.D.	N.D.	N.D.	6.58641	6.05894	5.97267	0.144496	0.122644	0.146632	9.89135	11.2893	9.01281	0.393177	0.422144	0.450631
IC-QE	ADP (13C+5; 0%)	23.9882	41.4977	36.6767	1.59429	1.39347	1.14167	193.725	185.518	171.884	5.79211	5.50211	6.04311	284.754	319.073	251.369	12.0193	13.7102	14.1514
IC-QE	ADP (13C+6; 0%)	2.12776	3.4376	3.20656	0.0142637	0.0296062	0.0231151	22.7243	20.9457	21.1403	0.207059	0.185286	0.195578	40.4015	45.2529	35.5663	0.596419	0.691222	0.733635
IC-QE	ADP (13C+7; 0%)	0.197349	0.386034	0.40346	N.D.	N.D.	N.D.	4.2737	4.14653	3.73905	N.D.	N.D.	N.D.	8.12213	9.25129	7.36171	0.107081	0.0357004	0.0677923
IC-QE	ADP (13C+8; 0%)	N.D.	N.D.	N.D.	N.D.	N.D.	N.D.	0.229182	0.202659	0.283712	N.D.	N.D.	N.D.	0.797294	1.04696	0.715176	N.D.	N.D.	N.D.
IC-QE	ADP (13C+9; 0%)	N.D.	N.D.	N.D.	N.D.	N.D.	N.D.	N.D.	N.D.	N.D.	N.D.	N.D.	N.D.	0.0318535	0.00716524	0.0209285	N.D.	N.D.	N.D.
IC-QE	ADP (13C+10; 0%)	N.D.	N.D.	N.D.	N.D.	N.D.	N.D.	N.D.	N.D.	N.D.	N.D.	N.D.	N.D.	N.D.	N.D.	N.D.	N.D.	N.D.	N.D.
IC-QE	AMP + 3'-AMP	36.2005	60.204	60.8088	34.5505	35.5318	32.6237	62.9222	82.2353	85.2017	36.905	34.1399	33.987	56.2212	59.4637	52.5036	26.6013	27.0724	25.9845
IC-QE	AMP + 3'-AMP (13C+1; 10.8%)	3.25369	5.6976	5.77467	3.28549	3.17003	3.04927	5.96087	7.71262	8.03745	3.21471	3.15165	3.06739	5.16535	5.56363	4.86856	2.33461	2.4359	2.24964
IC-QE	AMP + 3'-AMP (13C+2; 0.5%)	0.0520671	0.0512694	0.030158	0.0624904	0.0985753	0.0279283	0.153378	0.18361	0.101757	0.040738	0.0429126	0.0152444	0.140857	0.229302	0.0621463	0.0505912	0.0584003	0.0354138
IC-QE	AMP + 3'-AMP (13C+3; 0%)	0.00576158	N.D.	N.D.	N.D.	N.D.	N.D.	0.0515226	0.0725137	0.0899136	N.D.	N.D.	N.D.	0.134423	0.125724	0.0942099	N.D.	N.D.	N.D.
IC-QE	AMP + 3'-AMP (13C+4; 0%)	0.0261954	0.0866835	0.125667	N.D.	N.D.	N.D.	0.765525	1.11899	1.02181	N.D.	N.D.	N.D.	1.45588	1.65681	1.41313	N.D.	N.D.	N.D.
IC-QE	AMP + 3'-AMP (13C+5; 0%)	2.2344	4.18084	4.37588	0.0731101	0.0494322	0.0582376	25.0945	34.8101	33.3991	0.586715	0.553543	0.608475	48.5566	52.864	44.8918	1.26895	1.39936	1.34496
IC-QE	AMP + 3'-AMP (13C+6; 0%)	0.151193	0.302628	0.367506	N.D.	N.D.	N.D.	2.55753	3.63108	3.62085	N.D.	N.D.	N.D.	6.42658	6.82373	5.67907	N.D.	N.D.	N.D.
IC-QE	AMP + 3'-AMP (13C+7; 0%)	N.D.	N.D.	N.D.	N.D.	N.D.	N.D.	0.227075	0.349665	0.334948	N.D.	N.D.	N.D.	0.867675	0.878271	0.730375	N.D.	N.D.	N.D.
IC-QE	AMP + 3'-AMP (13C+8; 0%)	N.D.	N.D.	N.D.	N.D.	N.D.	N.D.	N.D.	N.D.	N.D.	N.D.	N.D.	N.D.	0.0233634	0.0159136	0.014506	N.D.	N.D.	N.D.
IC-QE	AMP + 3'-AMP (13C+9; 0%)	N.D.	N.D.	N.D.	N.D.	N.D.	N.D.	N.D.	N.D.	N.D.	N.D.	N.D.	N.D.	N.D.	N.D.	N.D.	N.D.	N.D.	N.D.
IC-QE	AMP + 3'-AMP (13C+10; 0%)	N.D.	N.D.	N.D.	N.D.	N.D.	N.D.	N.D.	N.D.	N.D.	N.D.	N.D.	N.D.	N.D.	N.D.	N.D.	N.D.	N.D.	N.D.
IC-QE	ATP	1049.57	1117.22	971.259	652.917	712.604	500.27	971.456	802.032	817.433	556.842	628.102	593.801	559.907	529.11	448.197	463.157	492.371	499.004
IC-QE	ATP (13C+1; 10.8%)	126.179	129.302	113.364	74.7063	82.3107	56.8551	106.649	90.4356	90.9406	61.3292	70.0082	64.8993	61.8249	58.2904	49.4958	51.3744	55.1084	55.2017
IC-QE	ATP (13C+2; 0.5%)	15.5038	30.2686	25.9477	11.272	14.1866	11.471	28.9491	23.8577	24.3859	15.1788	17.4663	16.215	17.0225	15.1557	13.0552	13.0487	14.7431	14.6209
IC-QE	ATP (13C+3; 0%)	2.87254	3.50665	2.4597	0.843911	0.225433	0.801653	4.77872	3.51664	3.55212	1.61385	1.56976	1.67139	4.28036	4.24587	3.3037	2.12728	2.31474	2.34762
IC-QE	ATP (13C+4; 0%)	4.24359	4.68812	4.32243	0.167819	0.157352	0.131518	19.7499	16.5562	15.8342	0.694296	0.771899	0.709103	24.484	22.7412	19.3001	1.93399	2.06624	2.19548
IC-QE	ATP (13C+5; 0%)	108.115	117.046	103.092	5.03691	5.55625	3.93543	488.711	408.351	392.098	18.4796	20.3466	19.6033	613.107	577.664	496.033	45.0618	50.2085	51.746
IC-QE	ATP (13C+6; 0%)	11.5575	12.6413	10.5203	0.317568	0.355494	0.211834	63.6451	53.2706	54.2722	1.0273	1.19562	1.08445	93.3114	90.7147	76.2778	2.91134	3.3004	3.41018
IC-QE	ATP (13C+7; 0%)	N.D.	0.549384	N.D.	N.D.	N.D.	N.D.	17.1677	14.1531	14.0645	0.197877	0.243849	0.212561	29.2487	26.6652	22.8467	0.259237	0.350512	0.576124
IC-QE	ATP (13C+8; 0%)	N.D.	N.D.	N.D.	N.D.	N.D.	N.D.	N.D.	N.D.	N.D.	N.D.	N.D.	N.D.	N.D.	N.D.	N.D.	N.D.	N.D.	N.D.
IC-QE	ATP (13C+9; 0%)	N.D.	N.D.	N.D.	N.D.	N.D.	N.D.	N.D.	N.D.	N.D.	N.D.	N.D.	N.D.	N.D.	N.D.	N.D.	N.D.	N.D.	N.D.
IC-QE	ATP (13C+10; 0%)	N.D.	N.D.	N.D.	N.D.	N.D.	N.D.	N.D.	N.D.	N.D.	N.D.	N.D.	N.D.	N.D.	N.D.	N.D.	N.D.	N.D.	N.D.
IC-QE	cAMP	0.392939	0.376577	0.361564	0.61963	0.635962	0.552436	0.238872	0.290176	0.364441	0.877834	0.909795	0.823543	0.171865	0.223618	0.245337	0.803742	0.770729	0.798621
IC-QE	cAMP (13C+1; 10.8%)	N.D.	N.D.	N.D.	N.D.	N.D.	N.D.	N.D.	N.D.	N.D.	N.D.	N.D.	N.D.	N.D.	N.D.	N.D.	N.D.	N.D.	N.D.
IC-QE	cAMP (13C+2; 0.5%)	N.D.	N.D.	N.D.	N.D.	N.D.	N.D.	N.D.	N.D.	N.D.	N.D.	N.D.	N.D.	N.D.	N.D.	N.D.	N.D.	N.D.	N.D.
IC-QE	cAMP (13C+3; 0%)	N.D.	N.D.	N.D.	N.D.	N.D.	N.D.	N.D.	N.D.	N.D.	N.D.	N.D.	N.D.	N.D.	N.D.	N.D.	N.D.	N.D.	N.D.
IC-QE	cAMP (13C+4; 0%)	N.D.	N.D.	N.D.	N.D.	N.D.	N.D.	N.D.	N.D.	N.D.	N.D.	N.D.	N.D.	N.D.	N.D.	N.D.	N.D.	N.D.	N.D.
IC-QE	cAMP (13C+5; 0%)	N.D.	N.D.	N.D.	N.D.	N.D.	N.D.	N.D.	0.0470383	0.0807098	N.D.	N.D.	N.D.	0.124059	0.21366	0.142552	N.D.	N.D.	N.D.
IC-QE	cAMP (13C+6; 0%)	N.D.	N.D.	N.D.	N.D.	N.D.	N.D.	N.D.	N.D.	N.D.	N.D.	N.D.	N.D.	N.D.	N.D.	N.D.	N.D.	N.D.	N.D.
IC-QE	cAMP (13C+7; 0%)	N.D.	N.D.	N.D.	N.D.	N.D.	N.D.	N.D.	N.D.	N.D.	N.D.	N.D.	N.D.	N.D.	N.D.	N.D.	N.D.	N.D.	N.D.
IC-QE	cAMP (13C+8; 0%)	N.D.	N.D.	N.D.	N.D.	N.D.	N.D.	N.D.	N.D.	N.D.	N.D.	N.D.	N.D.	N.D.	N.D.	N.D.	N.D.	N.D.	N.D.
IC-QE	cAMP (13C+9; 0%)	N.D.	N.D.	N.D.	N.D.	N.D.	N.D.	N.D.	N.D.	N.D.	N.D.	N.D.	N.D.	N.D.	N.D.	N.D.	N.D.	N.D.	N.D.
IC-QE	cAMP (13C+10; 0%)	N.D.	N.D.	N.D.	N.D.	N.D.	N.D.	N.D.	N.D.	N.D.	N.D.	N.D.	N.D.	N.D.	N.D.	N.D.	N.D.	N.D.	N.D.
IC-QE	Carbamoylaspartate	27.3474	35.8195	28.542	2.94493	3.86165	3.39631	29.9645	33.5032	31.3752	2.14109	1.83375	0.855538	25.7534	27.8053	23.9051	0.862104	0.643809	0.336232
IC-QE	Carbamoylaspartate (13C+1; 5.4%)	1.50826	2.00016	1.63026	0.146701	0.194878	0.168605	1.99637	2.21471	2.14391	0.123681	0.109783	0.0423871	1.96442	2.18847	1.88079	0.070171	0.0196057	0.0102024
IC-QE	Carbamoylaspartate (13C+2; 0.1%)	0.221685	0.297872	0.24123	0.0263441	0.0535768	0.0336131	4.61543	5.06474	5.45602	0.101647	0.100034	0.0307729	6.67523	7.18694	6.30053	0.0570148	0.032912	0.0125358
IC-QE	Carbamoylaspartate (13C+3; 0%)	0.217755	0.285858	0.247558	N.D.	N.D.	N.D.	1.79093	1.90674	2.24393	N.D.	N.D.	N.D.	3.09587	3.44356	2.91082	N.D.	N.D.	N.D.
IC-QE	Carbamoylaspartate (13C+4; 0%)	N.D.	N.D.	N.D.	N.D.	N.D.	N.D.	0.166088	0.18616	0.281563	N.D.	N.D.	N.D.	0.598663	0.651834	0.538174	N.D.	N.D.	N.D.
IC-QE	Carbamoylaspartate (13C+5; 0%)	N.D.	N.D.	N.D.	N.D.	N.D.	N.D.	N.D.	N.D.	N.D.	N.D.	N.D.	N.D.	N.D.	N.D.	N.D.	N.D.	N.D.	N.D.
IC-QE	CDP	21.7936	46.2849	42.1879	10.246	12.9714	9.57807	38.9746	42.2058	40.6934	6.11838	7.5712	6.50746	22.5469	23.2321	19.4244	3.55104	3.95596	4.55651
IC-QE	CDP (13C+1; 9.7%)	1.72112	3.93368	3.42303	0.89225	1.08456	0.860163	3.27889	3.62965	3.42704	0.432153	0.657051	0.621375	1.81159	2.01488	1.64655	0.276417	0.29239	0.350605
IC-QE	CDP (13C+2; 0.4%)	0.0886693	0.322716	0.351102	0.0744867	0.0772082	0.0833874	0.449485	0.183689	0.291153	0.0297752	0.0481017	0.0109107	0.199638	0.296901	0.0697403	0.00471261	0.0317309	0.0101465
IC-QE	CDP (13C+3; 0%)	0.00341791	0.0178644	0.0313994	N.D.	N.D.	N.D.	0.0314348	0.0619886	0.0382565	N.D.	N.D.	N.D.	0.0540854	0.0384979	0.0266644	N.D.	N.D.	N.D.
IC-QE	CDP (13C+4; 0%)	0.0099979	0.0752957	0.0490095	N.D.	N.D.	N.D.	0.524803	0.600229	0.42589	N.D.	N.D.	N.D.	0.684595	0.78219	0.589693	N.D.	N.D.	N.D.
IC-QE	CDP (13C+5; 0%)	1.44124	3.27659	3.00698	0.0419086	0.0411249	0.0882219	15.45	17.3311	15.1067	0.975568	1.25012	1.03718	21.9258	25.4864	20.1534	0.988594	1.07231	1.20091
IC-QE	CDP (13C+6; 0%)	0.0130177	0.0457482	0.0926412	N.D.	N.D.	N.D.	0.938356	1.15084	1.06282	0.0225726	0.0277169	0.0183174	2.40442	2.69053	2.28261	0.0164288	0.0328159	0.0640944
IC-QE	CDP (13C+7; 0%)	0.0071734	0.0178765	0.0118258	N.D.	N.D.	N.D.	0.489067	0.599362	0.585179	0.0115043	N.D.	0.00584788	2.02847	2.2336	1.66911	N.D.	0.00398693	0.00782523
IC-QE	CDP (13C+8; 0%)	N.D.	N.D.	N.D.	N.D.	N.D.	N.D.	0.0816783	0.149946	0.109753	N.D.	N.D.	N.D.	0.483184	0.627596	0.480765	N.D.	N.D.	N.D.
IC-QE	CDP (13C+9; 0%)	N.D.	N.D.	N.D.	N.D.	N.D.	N.D.	N.D.	N.D.	N.D.	N.D.	N.D.	N.D.	N.D.	N.D.	N.D.	N.D.	N.D.	N.D.
IC-QE	cGMP	N.D.	N.D.	N.D.	N.D.	N.D.	N.D.	N.D.	N.D.	N.D.	N.D.	N.D.	N.D.	N.D.	N.D.	N.D.	N.D.	N.D.	N.D.
IC-QE	cGMP (13C+1; 10.8%)	N.D.	N.D.	N.D.	N.D.	N.D.	N.D.	N.D.	N.D.	N.D.	N.D.	N.D.	N.D.	N.D.	N.D.	N.D.	N.D.	N.D.	N.D.
IC-QE	cGMP (13C+2; 0.5%)	N.D.	N.D.	N.D.	N.D.	N.D.	N.D.	N.D.	N.D.	N.D.	N.D.	N.D.	N.D.	N.D.	N.D.	N.D.	N.D.	N.D.	N.D.
IC-QE	cGMP (13C+3; 0%)	N.D.	N.D.	N.D.	N.D.	N.D.	N.D.	N.D.	N.D.	N.D.	N.D.	N.D.	N.D.	N.D.	N.D.	N.D.	N.D.	N.D.	N.D.
IC-QE	cGMP (13C+4; 0%)	N.D.	N.D.	N.D.	N.D.	N.D.	N.D.	N.D.	N.D.	N.D.	N.D.	N.D.	N.D.	N.D.	N.D.	N.D.	N.D.	N.D.	N.D.
IC-QE	cGMP (13C+5; 0%)	N.D.	N.D.	N.D.	N.D.	N.D.	N.D.	N.D.	N.D.	N.D.	N.D.	N.D.	N.D.	N.D.	N.D.	N.D.	N.D.	N.D.	N.D.
IC-QE	cGMP (13C+6; 0%)	N.D.	N.D.	N.D.	N.D.	N.D.	N.D.	N.D.	N.D.	N.D.	N.D.	N.D.	N.D.	N.D.	N.D.	N.D.	N.D.	N.D.	N.D.
IC-QE	cGMP (13C+7; 0%)	N.D.	N.D.	N.D.	N.D.	N.D.	N.D.	N.D.	N.D.	N.D.	N.D.	N.D.	N.D.	N.D.	N.D.	N.D.	N.D.	N.D.	N.D.
IC-QE	cGMP (13C+8; 0%)	N.D.	N.D.	N.D.	N.D.	N.D.	N.D.	N.D.	N.D.	N.D.	N.D.	N.D.	N.D.	N.D.	N.D.	N.D.	N.D.	N.D.	N.D.
IC-QE	cGMP (13C+9; 0%)	N.D.	N.D.	N.D.	N.D.	N.D.	N.D.	N.D.	N.D.	N.D.	N.D.	N.D.	N.D.	N.D.	N.D.	N.D.	N.D.	N.D.	N.D.
IC-QE	cGMP (13C+10; 0%)	N.D.	N.D.	N.D.	N.D.	N.D.	N.D.	N.D.	N.D.	N.D.	N.D.	N.D.	N.D.	N.D.	N.D.	N.D.	N.D.	N.D.	N.D.
IC-QE	cis-Aconitate	0.296345	0.458463	0.470597	3.59567	4.28038	3.7903	0.977617	1.0601	1.14525	4.88027	5.73176	4.97724	1.12938	1.13008	1.00249	5.17257	5.4511	5.76645
IC-QE	cis-Aconitate (13C+1; 6.5%)	0.0259416	0.0336219	0.0805197	0.27595	0.308177	0.284826	0.211656	0.233835	0.249056	0.648646	0.854635	0.651919	0.337101	0.324905	0.297432	0.904477	0.888784	0.950723
IC-QE	cis-Aconitate (13C+2; 0.2%)	2.0892	2.92894	3.11411	1.59305	1.99866	1.83456	9.3133	9.00419	9.05875	2.11482	2.27715	2.00903	10.9665	9.61546	8.60007	2.2793	2.26055	2.51073
IC-QE	cis-Aconitate (13C+3; 0%)	0.0442035	0.0553539	0.123223	0.0513421	0.057486	0.049879	0.46899	0.501514	0.528607	0.119539	0.129968	0.108545	0.780603	0.711768	0.664831	0.218439	0.200832	0.221036
IC-QE	cis-Aconitate (13C+4; 0%)	0.0110617	0.0236071	0.0289242	0.00694169	0.016239	0.00350874	1.56451	1.51055	1.62104	0.135044	0.105355	0.089113	2.9489	2.59523	2.25838	0.143687	0.132767	0.153091
IC-QE	cis-Aconitate (13C+5; 0%)	N.D.	N.D.	0.0133371	N.D.	N.D.	N.D.	0.547554	0.469077	0.602605	N.D.	N.D.	N.D.	1.19361	1.12233	0.947542	N.D.	N.D.	N.D.
IC-QE	cis-Aconitate (13C+6; 0%)	N.D.	N.D.	N.D.	N.D.	N.D.	N.D.	0.0069006	0.0143743	0.0273837	N.D.	N.D.	N.D.	0.206359	0.16102	0.155135	N.D.	N.D.	N.D.
IC-QE	Citramalate + 2-Hydroxyglutarate	1615.88	2193.1	1703.43	1115.44	1341.92	1185.03	2110.53	2335.16	2441.11	1312.03	1483.26	1504.33	2011.81	2106.23	1892.86	1329.13	1280.81	1340.26
IC-QE	Citramalate + 2-Hydroxyglutarate (13C+1; 5.4%)	93.1679	125.891	97.8069	63.8344	77.4016	68.1125	123.234	137.372	144.243	87.0009	97.8101	100.008	125.899	131.237	117.899	102.825	97.1661	101.793
IC-QE	Citramalate + 2-Hydroxyglutarate (13C+2; 0.1%)	3.29021	4.84243	3.76896	5.40266	6.37691	5.99086	121.818	125.72	142.837	67.953	81.5591	87.8107	343.993	362.737	322.917	132.959	119.259	127.993
IC-QE	Citramalate + 2-Hydroxyglutarate (13C+3; 0%)	N.D.	N.D.	N.D.	0.0818354	0.137454	0.175149	10.3644	11.4048	15.1393	5.68122	6.24473	6.75716	50.2912	51.9493	45.7202	13.952	12.5672	13.1271
IC-QE	Citramalate + 2-Hydroxyglutarate (13C+4; 0%)	N.D.	N.D.	N.D.	N.D.	N.D.	N.D.	8.73351	9.4623	13.372	2.41455	2.71958	2.75007	51.9441	55.2276	47.9405	6.7019	5.75976	6.37384
IC-QE	Citramalate + 2-Hydroxyglutarate (13C+5; 0%)	N.D.	N.D.	N.D.	N.D.	N.D.	N.D.	2.04528	2.09539	3.13006	0.062117	0.0599713	0.0706782	14.0574	15.1434	13.0853	0.406328	0.305153	0.361897
IC-QE	Citrate	12.8317	21.9929	20.4997	144.488	164.376	152.379	32.707	46.2388	50.2613	217.574	238.5	230.343	37.1683	47.008	41.169	181.141	215.726	208.223
IC-QE	Citrate (13C+1; 6.5%)	2.13992	3.58432	3.35553	13.0209	15.0017	14.0468	8.68927	11.2489	12.1562	34.3312	37.6185	37.6044	11.5439	14.3888	11.9896	34.4666	40.033	39.1749
IC-QE	Citrate (13C+2; 0.2%)	81.0128	138.464	129.908	75.1803	87.5211	83.359	307.204	371.895	372.344	98.7441	105.006	100.236	352.709	385.084	317.768	82.8526	95.9655	91.9955
IC-QE	Citrate (13C+3; 0%)	3.6612	6.43268	5.90405	3.55976	4.07691	3.80127	19.9371	24.5247	26.3908	8.11966	8.52925	8.83488	29.738	33.2941	27.5173	8.86476	9.98657	9.77795
IC-QE	Citrate (13C+4; 0%)	1.15827	1.99646	1.94969	1.42488	1.64553	1.63664	54.9636	64.5907	73.2931	5.9118	6.34232	6.17372	98.1121	107.94	88.927	6.24627	7.0209	6.73845
IC-QE	Citrate (13C+5; 0%)	1.67225	2.53094	2.19782	0.0404344	0.0499736	0.0399512	20.9587	23.9296	29.4947	0.523796	0.599605	0.581897	45.4887	50.1062	39.8752	0.699326	0.797776	0.755649
IC-QE	Citrate (13C+6; 0%)	N.D.	N.D.	N.D.	N.D.	N.D.	N.D.	2.41048	2.74224	3.82046	N.D.	N.D.	N.D.	9.03846	9.95011	7.85462	0.00916919	0.0126364	0.00963827
IC-QE	CMP	6.60078	13.0608	13.9411	5.80214	5.65829	5.39724	15.9624	15.1964	15.9936	4.44946	4.78307	4.75152	9.86014	12.1952	7.84845	3.28413	2.93534	3.63704
IC-QE	CMP (13C+1; 9.7%)	0.512112	1.15196	1.20671	0.386932	0.333743	0.453721	1.3329	1.18977	1.24672	0.264685	0.268773	0.329652	0.929392	0.894378	0.532698	0.15573	0.159404	0.20828
IC-QE	CMP (13C+2; 0.4%)	N.D.	N.D.	N.D.	N.D.	N.D.	N.D.	N.D.	N.D.	N.D.	N.D.	N.D.	N.D.	N.D.	N.D.	N.D.	N.D.	N.D.	N.D.
IC-QE	CMP (13C+3; 0%)	N.D.	N.D.	N.D.	N.D.	N.D.	N.D.	N.D.	N.D.	N.D.	N.D.	N.D.	N.D.	N.D.	N.D.	N.D.	N.D.	N.D.	N.D.
IC-QE	CMP (13C+4; 0%)	N.D.	N.D.	N.D.	N.D.	N.D.	N.D.	N.D.	0.024034	0.0869544	N.D.	N.D.	N.D.	0.189186	0.0656139	0.067841	N.D.	N.D.	N.D.
IC-QE	CMP (13C+5; 0%)	0.237296	0.689349	0.796735	N.D.	N.D.	N.D.	6.16059	6.37288	5.41202	0.461966	0.392228	0.36855	9.28127	10.9786	7.70781	0.550159	0.520764	0.53885
IC-QE	CMP (13C+6; 0%)	N.D.	N.D.	N.D.	N.D.	N.D.	N.D.	0.234878	0.186881	0.204774	N.D.	N.D.	N.D.	0.974234	1.04554	0.718608	N.D.	N.D.	N.D.
IC-QE	CMP (13C+7; 0%)	N.D.	N.D.	N.D.	N.D.	N.D.	N.D.	0.0910731	0.0452708	0.0287375	N.D.	N.D.	N.D.	0.647767	0.849849	0.607971	N.D.	N.D.	N.D.
IC-QE	CMP (13C+8; 0%)	N.D.	N.D.	N.D.	N.D.	N.D.	N.D.	N.D.	N.D.	N.D.	N.D.	N.D.	N.D.	0.0409982	0.0962124	0.042456	N.D.	N.D.	N.D.
IC-QE	CMP (13C+9; 0%)	N.D.	N.D.	N.D.	N.D.	N.D.	N.D.	N.D.	N.D.	N.D.	N.D.	N.D.	N.D.	N.D.	N.D.	N.D.	N.D.	N.D.	N.D.
IC-QE	CoA	3.86827	5.7448	2.11073	2.5368	2.88727	2.6147	3.41131	4.01456	3.87673	3.33732	4.09593	3.05505	2.65855	2.36989	2.65147	3.39222	3.17968	2.97459
IC-QE	CoA (13C+1; 22.7%)	0.863719	1.1825	0.553734	0.498558	0.664716	0.583375	0.860186	0.620449	0.618169	0.780533	1.02835	0.554205	0.445565	0.436464	0.714921	0.73859	0.575306	0.67407
IC-QE	CoA (13C+2; 2.5%)	N.D.	N.D.	N.D.	N.D.	N.D.	N.D.	N.D.	N.D.	N.D.	N.D.	N.D.	N.D.	N.D.	N.D.	N.D.	N.D.	N.D.	N.D.
IC-QE	CoA (13C+3; 0.2%)	N.D.	N.D.	N.D.	N.D.	N.D.	N.D.	N.D.	N.D.	N.D.	N.D.	N.D.	N.D.	N.D.	N.D.	N.D.	N.D.	N.D.	N.D.
IC-QE	CoA (13C+4; 0%)	N.D.	N.D.	N.D.	N.D.	N.D.	N.D.	N.D.	N.D.	N.D.	N.D.	N.D.	N.D.	N.D.	N.D.	N.D.	N.D.	N.D.	N.D.
IC-QE	CoA (13C+5; 0%)	N.D.	N.D.	N.D.	N.D.	N.D.	N.D.	N.D.	N.D.	N.D.	N.D.	N.D.	N.D.	N.D.	N.D.	N.D.	N.D.	N.D.	N.D.
IC-QE	CoA (13C+6; 0%)	N.D.	N.D.	N.D.	N.D.	N.D.	N.D.	N.D.	N.D.	N.D.	N.D.	N.D.	N.D.	N.D.	N.D.	N.D.	N.D.	N.D.	N.D.
IC-QE	CoA (13C+7; 0%)	N.D.	N.D.	N.D.	N.D.	N.D.	N.D.	N.D.	N.D.	N.D.	N.D.	N.D.	N.D.	N.D.	N.D.	N.D.	N.D.	N.D.	N.D.
IC-QE	CoA (13C+8; 0%)	N.D.	N.D.	N.D.	N.D.	N.D.	N.D.	N.D.	N.D.	N.D.	N.D.	N.D.	N.D.	N.D.	N.D.	N.D.	N.D.	N.D.	N.D.
IC-QE	CoA (13C+9; 0%)	N.D.	N.D.	N.D.	N.D.	N.D.	N.D.	N.D.	N.D.	N.D.	N.D.	N.D.	N.D.	N.D.	N.D.	N.D.	N.D.	N.D.	N.D.
IC-QE	CoA (13C+10; 0%)	N.D.	N.D.	N.D.	N.D.	N.D.	N.D.	N.D.	N.D.	N.D.	N.D.	N.D.	N.D.	N.D.	N.D.	N.D.	N.D.	N.D.	N.D.
IC-QE	CoA (13C+11; 0%)	N.D.	N.D.	N.D.	N.D.	N.D.	N.D.	N.D.	N.D.	N.D.	N.D.	N.D.	N.D.	N.D.	N.D.	N.D.	N.D.	N.D.	N.D.
IC-QE	CoA (13C+12; 0%)	N.D.	N.D.	N.D.	N.D.	N.D.	N.D.	N.D.	N.D.	N.D.	N.D.	N.D.	N.D.	N.D.	N.D.	N.D.	N.D.	N.D.	N.D.
IC-QE	CoA (13C+13; 0%)	N.D.	N.D.	N.D.	N.D.	N.D.	N.D.	N.D.	N.D.	N.D.	N.D.	N.D.	N.D.	N.D.	N.D.	N.D.	N.D.	N.D.	N.D.
IC-QE	CoA (13C+14; 0%)	N.D.	N.D.	N.D.	N.D.	N.D.	N.D.	N.D.	N.D.	N.D.	N.D.	N.D.	N.D.	N.D.	N.D.	N.D.	N.D.	N.D.	N.D.
IC-QE	CoA (13C+15; 0%)	N.D.	N.D.	N.D.	N.D.	N.D.	N.D.	N.D.	N.D.	N.D.	N.D.	N.D.	N.D.	N.D.	N.D.	N.D.	N.D.	N.D.	N.D.
IC-QE	CoA (13C+16; 0%)	N.D.	N.D.	N.D.	N.D.	N.D.	N.D.	N.D.	N.D.	N.D.	N.D.	N.D.	N.D.	N.D.	N.D.	N.D.	N.D.	N.D.	N.D.
IC-QE	CoA (13C+17; 0%)	N.D.	N.D.	N.D.	N.D.	N.D.	N.D.	N.D.	N.D.	N.D.	N.D.	N.D.	N.D.	N.D.	N.D.	N.D.	N.D.	N.D.	N.D.
IC-QE	CoA (13C+18; 0%)	N.D.	N.D.	N.D.	N.D.	N.D.	N.D.	N.D.	N.D.	N.D.	N.D.	N.D.	N.D.	N.D.	N.D.	N.D.	N.D.	N.D.	N.D.
IC-QE	CoA (13C+19; 0%)	N.D.	N.D.	N.D.	N.D.	N.D.	N.D.	N.D.	N.D.	N.D.	N.D.	N.D.	N.D.	N.D.	N.D.	N.D.	N.D.	N.D.	N.D.
IC-QE	CoA (13C+20; 0%)	N.D.	N.D.	N.D.	N.D.	N.D.	N.D.	N.D.	N.D.	N.D.	N.D.	N.D.	N.D.	N.D.	N.D.	N.D.	N.D.	N.D.	N.D.
IC-QE	CoA (13C+21; 0%)	N.D.	N.D.	N.D.	N.D.	N.D.	N.D.	N.D.	N.D.	N.D.	N.D.	N.D.	N.D.	N.D.	N.D.	N.D.	N.D.	N.D.	N.D.
IC-QE	CTP	134.244	176.671	133.532	74.6555	93.4127	66.6661	120.713	117.822	115.269	50.9921	55.4016	52.8012	85.8185	86.9627	63.1169	39.8279	40.389	41.4734
IC-QE	CTP (13C+1; 9.7%)	13.5541	18.1644	13.8648	7.72578	9.35293	6.78135	12.3619	11.92	12.0644	5.04502	5.49426	5.20133	8.73561	8.65367	6.39284	3.80396	4.06981	4.12243
IC-QE	CTP (13C+2; 0.4%)	1.965	4.61678	3.04129	0.443033	0.559423	0.584346	2.04528	1.80445	1.30043	0.961995	0.970007	0.467358	2.051	2.34292	0.902554	0.421971	0.622361	0.784259
IC-QE	CTP (13C+3; 0%)	0.177977	0.234263	0.134502	0.0754979	0.0747351	0.0816013	0.319974	0.364176	0.294423	0.312417	0.315593	0.304803	0.487085	0.48671	0.373308	0.387529	0.376991	0.368287
IC-QE	CTP (13C+4; 0%)	0.362959	0.487748	0.378745	0.0136079	0.0106274	0.0078007	1.78058	1.77839	1.62877	0.351899	0.301771	0.318318	2.92222	2.95922	2.24661	0.432304	0.435007	0.456963
IC-QE	CTP (13C+5; 0%)	10.9994	15.0247	11.388	0.742625	0.979483	0.805379	47.8586	48.7654	43.5304	9.14643	9.59807	8.74504	77.7679	80.7973	58.3939	11.0993	11.5942	11.7837
IC-QE	CTP (13C+6; 0%)	0.486908	0.622381	0.513575	0.0196058	0.0301482	0.0170185	3.60508	3.76085	3.44594	0.649436	0.739607	0.588966	10.2819	10.6695	7.89079	0.98773	1.08693	1.00962
IC-QE	CTP (13C+7; 0%)	N.D.	0.0744673	N.D.	N.D.	N.D.	N.D.	2.02487	2.05417	2.15849	0.260373	0.215594	0.154439	9.43019	10.0983	6.9682	0.363984	0.35533	0.395912
IC-QE	CTP (13C+8; 0%)	N.D.	N.D.	N.D.	N.D.	N.D.	N.D.	0.529777	0.538337	0.543244	N.D.	N.D.	N.D.	2.22825	2.33084	1.76371	N.D.	0.0369276	N.D.
IC-QE	CTP (13C+9; 0%)	N.D.	N.D.	N.D.	N.D.	N.D.	N.D.	N.D.	N.D.	N.D.	N.D.	N.D.	N.D.	N.D.	N.D.	N.D.	N.D.	N.D.	N.D.
IC-QE	Cysteine sulfinate	5.50947	6.70475	5.23674	2.04013	2.15881	1.89125	5.83914	4.9161	6.24164	1.81929	2.1607	2.07001	5.79102	5.53095	5.98606	2.5947	5.06067	3.12
IC-QE	Cysteine sulfinate (13C+1; 3.2%)	0.108793	0.141877	0.0921711	N.D.	N.D.	0.0226727	0.0874507	0.0771213	0.119311	N.D.	0.0196868	0.0259992	0.102983	0.105036	0.169708	0.0151737	0.131626	0.0537927
IC-QE	Cysteine sulfinate (13C+2; 0%)	N.D.	N.D.	N.D.	N.D.	N.D.	N.D.	N.D.	N.D.	N.D.	N.D.	N.D.	N.D.	N.D.	N.D.	N.D.	N.D.	N.D.	N.D.
IC-QE	Cysteine sulfinate (13C+3; 0%)	N.D.	N.D.	N.D.	N.D.	N.D.	N.D.	N.D.	N.D.	N.D.	N.D.	N.D.	N.D.	N.D.	N.D.	N.D.	N.D.	N.D.	N.D.
IC-QE	dADP	1.33477	2.05615	2.01471	0.192021	0.178742	0.168664	1.57069	1.87482	1.98068	0.136121	0.12046	0.10928	1.18873	1.26856	1.08673	0.047446	0.125737	0.0506953
IC-QE	dADP (13C+1; 10.8%)	0.0845193	0.0925231	0.176956	0.00659196	N.D.	N.D.	0.0573931	0.0626606	0.107004	N.D.	N.D.	N.D.	0.0361735	0.0453363	0.0167326	N.D.	N.D.	N.D.
IC-QE	dADP (13C+2; 0.5%)	N.D.	N.D.	N.D.	N.D.	N.D.	N.D.	N.D.	N.D.	N.D.	N.D.	N.D.	N.D.	N.D.	N.D.	N.D.	N.D.	N.D.	N.D.
IC-QE	dADP (13C+3; 0%)	N.D.	N.D.	N.D.	N.D.	N.D.	N.D.	N.D.	N.D.	N.D.	N.D.	N.D.	N.D.	N.D.	N.D.	N.D.	N.D.	N.D.	N.D.
IC-QE	dADP (13C+4; 0%)	N.D.	N.D.	N.D.	N.D.	N.D.	N.D.	N.D.	N.D.	N.D.	N.D.	N.D.	N.D.	N.D.	N.D.	N.D.	N.D.	N.D.	N.D.
IC-QE	dADP (13C+5; 0%)	0.0346352	0.0106945	0.0427521	N.D.	N.D.	N.D.	0.508633	0.723451	0.659929	N.D.	N.D.	N.D.	1.40688	1.23268	1.04648	N.D.	N.D.	N.D.
IC-QE	dADP (13C+6; 0%)	N.D.	N.D.	N.D.	N.D.	N.D.	N.D.	0.0355612	N.D.	0.027771	N.D.	N.D.	N.D.	0.0923806	0.0785875	0.0646453	N.D.	N.D.	N.D.
IC-QE	dADP (13C+7; 0%)	N.D.	N.D.	N.D.	N.D.	N.D.	N.D.	N.D.	N.D.	N.D.	N.D.	N.D.	N.D.	N.D.	N.D.	N.D.	N.D.	N.D.	N.D.
IC-QE	dADP (13C+8; 0%)	N.D.	N.D.	N.D.	N.D.	N.D.	N.D.	N.D.	N.D.	N.D.	N.D.	N.D.	N.D.	N.D.	N.D.	N.D.	N.D.	N.D.	N.D.
IC-QE	dADP (13C+9; 0%)	N.D.	N.D.	N.D.	N.D.	N.D.	N.D.	N.D.	N.D.	N.D.	N.D.	N.D.	N.D.	N.D.	N.D.	N.D.	N.D.	N.D.	N.D.
IC-QE	dADP (13C+10; 0%)	N.D.	N.D.	N.D.	N.D.	N.D.	N.D.	N.D.	N.D.	N.D.	N.D.	N.D.	N.D.	N.D.	N.D.	N.D.	N.D.	N.D.	N.D.
IC-QE	dAMP	0.182822	0.369734	0.482328	N.D.	N.D.	N.D.	0.482269	0.717527	0.365927	N.D.	N.D.	N.D.	0.250257	0.253276	0.157252	N.D.	N.D.	N.D.
IC-QE	dAMP (13C+1; 10.8%)	N.D.	N.D.	N.D.	N.D.	N.D.	N.D.	N.D.	N.D.	N.D.	N.D.	N.D.	N.D.	N.D.	N.D.	N.D.	N.D.	N.D.	N.D.
IC-QE	dAMP (13C+2; 0.5%)	N.D.	N.D.	N.D.	N.D.	N.D.	N.D.	N.D.	N.D.	N.D.	N.D.	N.D.	N.D.	N.D.	N.D.	N.D.	N.D.	N.D.	N.D.
IC-QE	dAMP (13C+3; 0%)	N.D.	N.D.	N.D.	N.D.	N.D.	N.D.	N.D.	N.D.	N.D.	N.D.	N.D.	N.D.	N.D.	N.D.	N.D.	N.D.	N.D.	N.D.
IC-QE	dAMP (13C+4; 0%)	N.D.	N.D.	N.D.	N.D.	N.D.	N.D.	N.D.	N.D.	N.D.	N.D.	N.D.	N.D.	N.D.	N.D.	N.D.	N.D.	N.D.	N.D.
IC-QE	dAMP (13C+5; 0%)	N.D.	N.D.	N.D.	N.D.	N.D.	N.D.	0.0948207	0.119147	0.0877368	N.D.	N.D.	N.D.	0.282036	0.27927	0.301808	N.D.	N.D.	N.D.
IC-QE	dAMP (13C+6; 0%)	N.D.	N.D.	N.D.	N.D.	N.D.	N.D.	N.D.	N.D.	N.D.	N.D.	N.D.	N.D.	N.D.	N.D.	N.D.	N.D.	N.D.	N.D.
IC-QE	dAMP (13C+7; 0%)	N.D.	N.D.	N.D.	N.D.	N.D.	N.D.	N.D.	N.D.	N.D.	N.D.	N.D.	N.D.	N.D.	N.D.	N.D.	N.D.	N.D.	N.D.
IC-QE	dAMP (13C+8; 0%)	N.D.	N.D.	N.D.	N.D.	N.D.	N.D.	N.D.	N.D.	N.D.	N.D.	N.D.	N.D.	N.D.	N.D.	N.D.	N.D.	N.D.	N.D.
IC-QE	dAMP (13C+9; 0%)	N.D.	N.D.	N.D.	N.D.	N.D.	N.D.	N.D.	N.D.	N.D.	N.D.	N.D.	N.D.	N.D.	N.D.	N.D.	N.D.	N.D.	N.D.
IC-QE	dAMP (13C+10; 0%)	N.D.	N.D.	N.D.	N.D.	N.D.	N.D.	N.D.	N.D.	N.D.	N.D.	N.D.	N.D.	N.D.	N.D.	N.D.	N.D.	N.D.	N.D.
IC-QE	dATP	9.07332	9.53083	7.78807	1.47764	1.5725	1.21841	5.55874	5.67659	5.00354	1.22985	1.47726	1.47805	3.58947	3.8149	3.06582	0.85956	0.735436	0.860227
IC-QE	dATP (13C+1; 10.8%)	0.848305	0.846358	0.667498	0.118357	0.0876097	0.0847895	0.4799	0.569448	0.448948	0.0663407	0.0880947	0.0672971	0.407331	0.30018	0.27101	N.D.	0.0513686	0.0211248
IC-QE	dATP (13C+2; 0.5%)	N.D.	N.D.	N.D.	N.D.	N.D.	N.D.	N.D.	N.D.	N.D.	N.D.	N.D.	N.D.	N.D.	N.D.	N.D.	N.D.	N.D.	N.D.
IC-QE	dATP (13C+3; 0%)	N.D.	N.D.	N.D.	N.D.	N.D.	N.D.	N.D.	N.D.	N.D.	N.D.	N.D.	N.D.	N.D.	N.D.	N.D.	N.D.	N.D.	N.D.
IC-QE	dATP (13C+4; 0%)	N.D.	N.D.	N.D.	N.D.	N.D.	N.D.	0.0227563	0.0565301	N.D.	N.D.	N.D.	N.D.	0.113611	0.0652099	0.0713113	N.D.	N.D.	N.D.
IC-QE	dATP (13C+5; 0%)	0.344102	0.346491	0.37744	N.D.	N.D.	N.D.	2.49328	2.42748	2.10434	N.D.	N.D.	N.D.	4.42335	4.06721	3.31995	N.D.	N.D.	N.D.
IC-QE	dATP (13C+6; 0%)	N.D.	N.D.	N.D.	N.D.	N.D.	N.D.	0.255268	0.189912	0.16272	N.D.	N.D.	N.D.	0.587425	0.595868	0.422984	N.D.	N.D.	N.D.
IC-QE	dATP (13C+7; 0%)	N.D.	N.D.	N.D.	N.D.	N.D.	N.D.	N.D.	N.D.	N.D.	N.D.	N.D.	N.D.	0.0526726	0.0685023	0.0246014	N.D.	N.D.	N.D.
IC-QE	dATP (13C+8; 0%)	N.D.	N.D.	N.D.	N.D.	N.D.	N.D.	N.D.	N.D.	N.D.	N.D.	N.D.	N.D.	N.D.	N.D.	N.D.	N.D.	N.D.	N.D.
IC-QE	dATP (13C+9; 0%)	N.D.	N.D.	N.D.	N.D.	N.D.	N.D.	N.D.	N.D.	N.D.	N.D.	N.D.	N.D.	N.D.	N.D.	N.D.	N.D.	N.D.	N.D.
IC-QE	dATP (13C+10; 0%)	N.D.	N.D.	N.D.	N.D.	N.D.	N.D.	N.D.	N.D.	N.D.	N.D.	N.D.	N.D.	N.D.	N.D.	N.D.	N.D.	N.D.	N.D.
IC-QE	dCDP	0.602743	1.3281	1.28663	0.0877937	0.144949	0.0845645	1.09613	1.24262	1.12253	0.0234697	0.0313761	0.0376315	0.701874	0.650143	0.502216	N.D.	N.D.	N.D.
IC-QE	dCDP (13C+1; 9.7%)	0.0185352	0.04604	0.0720466	N.D.	N.D.	N.D.	0.0605512	0.0258046	0.0434674	N.D.	N.D.	N.D.	N.D.	N.D.	N.D.	N.D.	N.D.	N.D.
IC-QE	dCDP (13C+2; 0.4%)	N.D.	N.D.	N.D.	N.D.	N.D.	N.D.	N.D.	N.D.	N.D.	N.D.	N.D.	N.D.	N.D.	N.D.	N.D.	N.D.	N.D.	N.D.
IC-QE	dCDP (13C+3; 0%)	N.D.	N.D.	N.D.	N.D.	N.D.	N.D.	N.D.	N.D.	N.D.	N.D.	N.D.	N.D.	N.D.	N.D.	N.D.	N.D.	N.D.	N.D.
IC-QE	dCDP (13C+4; 0%)	N.D.	N.D.	N.D.	N.D.	N.D.	N.D.	N.D.	N.D.	N.D.	N.D.	N.D.	N.D.	N.D.	N.D.	N.D.	N.D.	N.D.	N.D.
IC-QE	dCDP (13C+5; 0%)	0.0136442	0.033884	0.0415723	N.D.	N.D.	N.D.	0.470013	0.526805	0.446769	N.D.	N.D.	N.D.	0.724487	0.754861	0.576997	N.D.	N.D.	N.D.
IC-QE	dCDP (13C+6; 0%)	N.D.	N.D.	N.D.	N.D.	N.D.	N.D.	N.D.	0.00683165	0.00553931	N.D.	N.D.	N.D.	0.0120337	0.0443438	0.00504364	N.D.	N.D.	N.D.
IC-QE	dCDP (13C+7; 0%)	N.D.	N.D.	N.D.	N.D.	N.D.	N.D.	N.D.	0.00419671	N.D.	N.D.	N.D.	N.D.	0.0269871	0.00427366	0.00747647	N.D.	N.D.	N.D.
IC-QE	dCDP (13C+8; 0%)	N.D.	N.D.	N.D.	N.D.	N.D.	N.D.	N.D.	N.D.	N.D.	N.D.	N.D.	N.D.	N.D.	N.D.	N.D.	N.D.	N.D.	N.D.
IC-QE	dCDP (13C+9; 0%)	N.D.	N.D.	N.D.	N.D.	N.D.	N.D.	N.D.	N.D.	N.D.	N.D.	N.D.	N.D.	N.D.	N.D.	N.D.	N.D.	N.D.	N.D.
IC-QE	dCMP	0.204328	0.325999	0.292516	N.D.	N.D.	N.D.	0.307474	0.422004	0.293382	N.D.	N.D.	N.D.	0.183726	0.13182	0.123412	N.D.	N.D.	N.D.
IC-QE	dCMP (13C+1; 9.7%)	N.D.	N.D.	N.D.	N.D.	N.D.	N.D.	N.D.	N.D.	N.D.	N.D.	N.D.	N.D.	N.D.	N.D.	N.D.	N.D.	N.D.	N.D.
IC-QE	dCMP (13C+2; 0.4%)	N.D.	N.D.	N.D.	N.D.	N.D.	N.D.	N.D.	N.D.	N.D.	N.D.	N.D.	N.D.	N.D.	N.D.	N.D.	N.D.	N.D.	N.D.
IC-QE	dCMP (13C+3; 0%)	N.D.	N.D.	N.D.	N.D.	N.D.	N.D.	N.D.	N.D.	N.D.	N.D.	N.D.	N.D.	N.D.	N.D.	N.D.	N.D.	N.D.	N.D.
IC-QE	dCMP (13C+4; 0%)	N.D.	N.D.	N.D.	N.D.	N.D.	N.D.	N.D.	N.D.	N.D.	N.D.	N.D.	N.D.	N.D.	N.D.	N.D.	N.D.	N.D.	N.D.
IC-QE	dCMP (13C+5; 0%)	N.D.	N.D.	N.D.	N.D.	N.D.	N.D.	N.D.	0.0298698	0.0337563	N.D.	N.D.	N.D.	0.104061	0.229044	0.106684	N.D.	N.D.	N.D.
IC-QE	dCMP (13C+6; 0%)	N.D.	N.D.	N.D.	N.D.	N.D.	N.D.	N.D.	N.D.	N.D.	N.D.	N.D.	N.D.	N.D.	N.D.	N.D.	N.D.	N.D.	N.D.
IC-QE	dCMP (13C+7; 0%)	N.D.	N.D.	N.D.	N.D.	N.D.	N.D.	N.D.	N.D.	N.D.	N.D.	N.D.	N.D.	N.D.	N.D.	N.D.	N.D.	N.D.	N.D.
IC-QE	dCMP (13C+8; 0%)	N.D.	N.D.	N.D.	N.D.	N.D.	N.D.	N.D.	N.D.	N.D.	N.D.	N.D.	N.D.	N.D.	N.D.	N.D.	N.D.	N.D.	N.D.
IC-QE	dCMP (13C+9; 0%)	N.D.	N.D.	N.D.	N.D.	N.D.	N.D.	N.D.	N.D.	N.D.	N.D.	N.D.	N.D.	N.D.	N.D.	N.D.	N.D.	N.D.	N.D.
IC-QE	dCTP	7.3277	8.00982	6.93587	1.78648	1.73382	1.57399	5.98934	5.45347	5.27059	0.889883	1.17281	1.1146	3.60992	3.44412	3.00154	0.585262	0.661634	0.617671
IC-QE	dCTP (13C+1; 9.7%)	0.707114	0.708289	0.603105	0.0947759	0.108027	0.125379	0.525231	0.435011	0.4585	0.0714757	0.0789748	0.0876354	0.298879	0.318709	0.269194	0.0402594	0.019687	0.033538
IC-QE	dCTP (13C+2; 0.4%)	0.0144454	0.0500458	0.0501852	N.D.	N.D.	N.D.	0.0408001	0.0178017	0.0072611	N.D.	N.D.	N.D.	N.D.	N.D.	0.0245231	N.D.	N.D.	N.D.
IC-QE	dCTP (13C+3; 0%)	N.D.	N.D.	N.D.	N.D.	N.D.	N.D.	N.D.	N.D.	N.D.	N.D.	N.D.	N.D.	N.D.	N.D.	N.D.	N.D.	N.D.	N.D.
IC-QE	dCTP (13C+4; 0%)	N.D.	N.D.	N.D.	N.D.	N.D.	N.D.	0.0732232	0.0291281	0.0366687	N.D.	N.D.	N.D.	0.125316	0.0829356	0.0928681	N.D.	N.D.	N.D.
IC-QE	dCTP (13C+5; 0%)	0.408154	0.419574	0.390924	N.D.	N.D.	N.D.	2.55699	2.58817	2.24905	0.123955	0.165238	0.125026	3.84039	3.80011	3.04555	0.0867021	0.178976	0.155869
IC-QE	dCTP (13C+6; 0%)	N.D.	N.D.	N.D.	N.D.	N.D.	N.D.	0.110719	0.108047	0.161016	N.D.	N.D.	N.D.	0.413947	0.470374	0.38172	N.D.	N.D.	N.D.
IC-QE	dCTP (13C+7; 0%)	N.D.	N.D.	N.D.	N.D.	N.D.	N.D.	0.0580288	0.0592158	0.0664795	N.D.	N.D.	N.D.	0.385693	0.285656	0.272237	N.D.	N.D.	N.D.
IC-QE	dCTP (13C+8; 0%)	N.D.	N.D.	N.D.	N.D.	N.D.	N.D.	N.D.	N.D.	N.D.	N.D.	N.D.	N.D.	0.069397	0.0345751	0.039566	N.D.	N.D.	N.D.
IC-QE	dCTP (13C+9; 0%)	N.D.	N.D.	N.D.	N.D.	N.D.	N.D.	N.D.	N.D.	N.D.	N.D.	N.D.	N.D.	N.D.	N.D.	N.D.	N.D.	N.D.	N.D.
IC-QE	dGDP	N.D.	N.D.	N.D.	N.D.	N.D.	N.D.	N.D.	N.D.	N.D.	N.D.	N.D.	N.D.	N.D.	N.D.	N.D.	N.D.	N.D.	N.D.
IC-QE	dGDP (13C+1; 10.8%)	N.D.	N.D.	N.D.	N.D.	N.D.	N.D.	N.D.	N.D.	N.D.	N.D.	N.D.	N.D.	N.D.	N.D.	N.D.	N.D.	N.D.	N.D.
IC-QE	dGDP (13C+2; 0.5%)	N.D.	N.D.	N.D.	N.D.	N.D.	N.D.	N.D.	N.D.	N.D.	N.D.	N.D.	N.D.	N.D.	N.D.	N.D.	N.D.	N.D.	N.D.
IC-QE	dGDP (13C+3; 0%)	N.D.	N.D.	N.D.	N.D.	N.D.	N.D.	N.D.	N.D.	N.D.	N.D.	N.D.	N.D.	N.D.	N.D.	N.D.	N.D.	N.D.	N.D.
IC-QE	dGDP (13C+4; 0%)	N.D.	N.D.	N.D.	N.D.	N.D.	N.D.	N.D.	N.D.	N.D.	N.D.	N.D.	N.D.	N.D.	N.D.	N.D.	N.D.	N.D.	N.D.
IC-QE	dGDP (13C+5; 0%)	N.D.	0.0441671	0.0542993	N.D.	N.D.	N.D.	0.292321	0.323139	0.282045	N.D.	N.D.	N.D.	0.632933	0.72208	0.357194	N.D.	N.D.	N.D.
IC-QE	dGDP (13C+6; 0%)	N.D.	N.D.	N.D.	N.D.	N.D.	N.D.	N.D.	N.D.	N.D.	N.D.	N.D.	N.D.	N.D.	N.D.	N.D.	N.D.	N.D.	N.D.
IC-QE	dGDP (13C+7; 0%)	N.D.	N.D.	N.D.	N.D.	N.D.	N.D.	N.D.	N.D.	N.D.	N.D.	N.D.	N.D.	N.D.	N.D.	N.D.	N.D.	N.D.	N.D.
IC-QE	dGDP (13C+8; 0%)	N.D.	N.D.	N.D.	N.D.	N.D.	N.D.	N.D.	N.D.	N.D.	N.D.	N.D.	N.D.	N.D.	N.D.	N.D.	N.D.	N.D.	N.D.
IC-QE	dGDP (13C+9; 0%)	N.D.	N.D.	N.D.	N.D.	N.D.	N.D.	N.D.	N.D.	N.D.	N.D.	N.D.	N.D.	N.D.	N.D.	N.D.	N.D.	N.D.	N.D.
IC-QE	dGDP (13C+10; 0%)	N.D.	N.D.	N.D.	N.D.	N.D.	N.D.	N.D.	N.D.	N.D.	N.D.	N.D.	N.D.	N.D.	N.D.	N.D.	N.D.	N.D.	N.D.
IC-QE	dGTP	0.521184	0.535285	0.408223	0.166463	0.168221	0.143683	0.162341	0.0966145	0.16851	0.0834523	0.0933323	0.215615	0.0959481	0.132865	0.0587309	0.054165	0.0301278	0.0500463
IC-QE	dGTP (13C+1; 10.8%)	N.D.	N.D.	N.D.	N.D.	N.D.	N.D.	N.D.	N.D.	N.D.	N.D.	N.D.	N.D.	N.D.	N.D.	N.D.	N.D.	N.D.	N.D.
IC-QE	dGTP (13C+2; 0.5%)	N.D.	N.D.	N.D.	N.D.	N.D.	N.D.	N.D.	N.D.	N.D.	N.D.	N.D.	N.D.	N.D.	N.D.	N.D.	N.D.	N.D.	N.D.
IC-QE	dGTP (13C+3; 0%)	N.D.	N.D.	N.D.	N.D.	N.D.	N.D.	N.D.	N.D.	N.D.	N.D.	N.D.	N.D.	N.D.	N.D.	N.D.	N.D.	N.D.	N.D.
IC-QE	dGTP (13C+4; 0%)	N.D.	N.D.	N.D.	N.D.	N.D.	N.D.	N.D.	N.D.	N.D.	N.D.	N.D.	N.D.	N.D.	N.D.	N.D.	N.D.	N.D.	N.D.
IC-QE	dGTP (13C+5; 0%)	0.136906	0.117018	0.0659027	N.D.	N.D.	N.D.	0.450081	0.272693	0.19473	N.D.	N.D.	N.D.	0.393013	0.382841	0.50174	N.D.	N.D.	N.D.
IC-QE	dGTP (13C+6; 0%)	N.D.	N.D.	N.D.	N.D.	N.D.	N.D.	N.D.	N.D.	N.D.	N.D.	N.D.	N.D.	N.D.	N.D.	N.D.	N.D.	N.D.	N.D.
IC-QE	dGTP (13C+7; 0%)	N.D.	N.D.	N.D.	N.D.	N.D.	N.D.	N.D.	N.D.	N.D.	N.D.	N.D.	N.D.	N.D.	N.D.	N.D.	N.D.	N.D.	N.D.
IC-QE	dGTP (13C+8; 0%)	N.D.	N.D.	N.D.	N.D.	N.D.	N.D.	N.D.	N.D.	N.D.	N.D.	N.D.	N.D.	N.D.	N.D.	N.D.	N.D.	N.D.	N.D.
IC-QE	dGTP (13C+9; 0%)	N.D.	N.D.	N.D.	N.D.	N.D.	N.D.	N.D.	N.D.	N.D.	N.D.	N.D.	N.D.	N.D.	N.D.	N.D.	N.D.	N.D.	N.D.
IC-QE	dGTP (13C+10; 0%)	N.D.	N.D.	N.D.	N.D.	N.D.	N.D.	N.D.	N.D.	N.D.	N.D.	N.D.	N.D.	N.D.	N.D.	N.D.	N.D.	N.D.	N.D.
IC-QE	Dihydroorotate	1.25915	1.27902	1.13545	N.D.	N.D.	N.D.	0.839045	1.0458	1.13672	N.D.	N.D.	N.D.	0.901123	1.14286	0.723562	N.D.	N.D.	N.D.
IC-QE	Dihydroorotate (13C+1; 5.4%)	N.D.	N.D.	N.D.	N.D.	N.D.	N.D.	N.D.	N.D.	N.D.	N.D.	N.D.	N.D.	N.D.	N.D.	N.D.	N.D.	N.D.	N.D.
IC-QE	Dihydroorotate (13C+2; 0.1%)	N.D.	N.D.	N.D.	N.D.	N.D.	N.D.	N.D.	N.D.	N.D.	N.D.	N.D.	N.D.	N.D.	N.D.	N.D.	N.D.	N.D.	N.D.
IC-QE	Dihydroorotate (13C+3; 0%)	N.D.	N.D.	N.D.	N.D.	N.D.	N.D.	N.D.	N.D.	N.D.	N.D.	N.D.	N.D.	N.D.	N.D.	N.D.	N.D.	N.D.	N.D.
IC-QE	Dihydroorotate (13C+4; 0%)	N.D.	N.D.	N.D.	N.D.	N.D.	N.D.	N.D.	N.D.	N.D.	N.D.	N.D.	N.D.	N.D.	N.D.	N.D.	N.D.	N.D.	N.D.
IC-QE	Dihydroorotate (13C+5; 0%)	N.D.	N.D.	N.D.	N.D.	N.D.	N.D.	N.D.	N.D.	N.D.	N.D.	N.D.	N.D.	N.D.	N.D.	N.D.	N.D.	N.D.	N.D.
IC-QE	dTDP	1.63706	3.18234	3.27137	0.469052	0.464188	0.330628	3.24671	3.20816	3.4597	0.245789	0.290964	0.246453	1.90191	1.74438	1.46559	0.0906242	0.0998511	0.100035
IC-QE	dTDP (13C+1; 10.8%)	0.189026	0.356673	0.334834	0.0194586	0.014136	0.00409397	0.436277	0.427958	0.391194	0.00618446	0.00376784	0.00827413	0.232433	0.265018	0.177932	N.D.	N.D.	N.D.
IC-QE	dTDP (13C+2; 0.5%)	N.D.	N.D.	N.D.	N.D.	N.D.	N.D.	N.D.	N.D.	N.D.	N.D.	N.D.	N.D.	N.D.	N.D.	N.D.	N.D.	N.D.	N.D.
IC-QE	dTDP (13C+3; 0%)	N.D.	N.D.	N.D.	N.D.	N.D.	N.D.	N.D.	N.D.	N.D.	N.D.	N.D.	N.D.	N.D.	N.D.	N.D.	N.D.	N.D.	N.D.
IC-QE	dTDP (13C+4; 0%)	N.D.	N.D.	N.D.	N.D.	N.D.	N.D.	0.0168996	N.D.	N.D.	N.D.	N.D.	N.D.	0.0222499	0.0164066	0.0136984	N.D.	N.D.	N.D.
IC-QE	dTDP (13C+5; 0%)	0.0577837	0.127337	0.183742	N.D.	N.D.	N.D.	1.25681	1.33582	1.27999	N.D.	N.D.	N.D.	1.89169	1.55548	1.36662	N.D.	N.D.	N.D.
IC-QE	dTDP (13C+6; 0%)	N.D.	N.D.	N.D.	N.D.	N.D.	N.D.	0.0917021	0.0791188	0.122558	N.D.	N.D.	N.D.	0.303676	0.291392	0.215806	N.D.	N.D.	N.D.
IC-QE	dTDP (13C+7; 0%)	N.D.	N.D.	N.D.	N.D.	N.D.	N.D.	0.0159836	0.0050347	0.0234272	N.D.	N.D.	N.D.	0.117381	0.0877842	0.0758881	N.D.	N.D.	N.D.
IC-QE	dTDP (13C+8; 0%)	N.D.	N.D.	N.D.	N.D.	N.D.	N.D.	N.D.	N.D.	N.D.	N.D.	N.D.	N.D.	N.D.	N.D.	0.009479	N.D.	N.D.	N.D.
IC-QE	dTDP (13C+9; 0%)	N.D.	N.D.	N.D.	N.D.	N.D.	N.D.	N.D.	N.D.	N.D.	N.D.	N.D.	N.D.	N.D.	N.D.	N.D.	N.D.	N.D.	N.D.
IC-QE	dTDP (13C+10; 0%)	N.D.	N.D.	N.D.	N.D.	N.D.	N.D.	N.D.	N.D.	N.D.	N.D.	N.D.	N.D.	N.D.	N.D.	N.D.	N.D.	N.D.	N.D.
IC-QE	dTMP	0.520972	0.806659	0.971548	0.297489	0.288627	0.333528	1.20744	1.6976	1.83648	0.198048	0.275516	0.174839	1.04802	1.00071	0.932547	0.0953317	0.103782	0.0623261
IC-QE	dTMP (13C+1; 10.8%)	0.0217522	0.0581401	0.0598517	0.0074358	0.00450817	N.D.	0.0766208	0.146056	0.168529	N.D.	N.D.	N.D.	0.0737339	0.102334	0.0716441	N.D.	N.D.	N.D.
IC-QE	dTMP (13C+2; 0.5%)	N.D.	N.D.	N.D.	N.D.	N.D.	N.D.	N.D.	N.D.	N.D.	N.D.	N.D.	N.D.	N.D.	N.D.	N.D.	N.D.	N.D.	N.D.
IC-QE	dTMP (13C+3; 0%)	N.D.	N.D.	N.D.	N.D.	N.D.	N.D.	N.D.	N.D.	N.D.	N.D.	N.D.	N.D.	N.D.	N.D.	N.D.	N.D.	N.D.	N.D.
IC-QE	dTMP (13C+4; 0%)	N.D.	N.D.	N.D.	N.D.	N.D.	N.D.	N.D.	N.D.	N.D.	N.D.	N.D.	N.D.	N.D.	N.D.	N.D.	N.D.	N.D.	N.D.
IC-QE	dTMP (13C+5; 0%)	0.00719803	N.D.	0.0155445	N.D.	N.D.	N.D.	0.559237	0.825963	0.797358	N.D.	N.D.	N.D.	1.07556	1.06696	0.936803	N.D.	N.D.	N.D.
IC-QE	dTMP (13C+6; 0%)	N.D.	N.D.	N.D.	N.D.	N.D.	N.D.	0.0214121	0.0316178	0.0230134	N.D.	N.D.	N.D.	0.114273	0.122116	0.0957243	N.D.	N.D.	N.D.
IC-QE	dTMP (13C+7; 0%)	N.D.	N.D.	N.D.	N.D.	N.D.	N.D.	N.D.	N.D.	N.D.	N.D.	N.D.	N.D.	0.041855	0.0350366	0.022147	N.D.	N.D.	N.D.
IC-QE	dTMP (13C+8; 0%)	N.D.	N.D.	N.D.	N.D.	N.D.	N.D.	N.D.	N.D.	N.D.	N.D.	N.D.	N.D.	N.D.	N.D.	N.D.	N.D.	N.D.	N.D.
IC-QE	dTMP (13C+9; 0%)	N.D.	N.D.	N.D.	N.D.	N.D.	N.D.	N.D.	N.D.	N.D.	N.D.	N.D.	N.D.	N.D.	N.D.	N.D.	N.D.	N.D.	N.D.
IC-QE	dTMP (13C+10; 0%)	N.D.	N.D.	N.D.	N.D.	N.D.	N.D.	N.D.	N.D.	N.D.	N.D.	N.D.	N.D.	N.D.	N.D.	N.D.	N.D.	N.D.	N.D.
IC-QE	dTTP	16.5345	19.2645	14.2511	3.73479	3.6974	3.51007	14.5178	11.5856	12.261	2.8769	2.77553	3.17841	8.83086	8.48452	7.11583	1.28915	1.67196	1.76548
IC-QE	dTTP (13C+1; 10.8%)	2.10672	2.37833	1.67532	0.382564	0.403748	0.335344	1.95498	1.60256	1.81467	0.333045	0.287254	0.294811	1.36478	1.31746	1.1421	0.152656	0.207257	0.203517
IC-QE	dTTP (13C+2; 0.5%)	0.104505	0.377342	0.274912	0.0453146	0.0217176	0.0598609	0.173677	0.174869	0.222416	0.0572424	0.0118822	0.0221443	0.198795	0.129634	0.122427	0.0201217	0.0180119	0.0122489
IC-QE	dTTP (13C+3; 0%)	0.00889666	0.0178393	0.0210074	N.D.	N.D.	N.D.	0.022631	0.0102255	0.0188943	0.00268377	0.0117022	N.D.	0.0284988	0.0231233	0.0067148	0.00830616	0.00588945	N.D.
IC-QE	dTTP (13C+4; 0%)	0.0055514	0.00825798	0.0137099	N.D.	N.D.	N.D.	0.184044	0.122181	0.123773	N.D.	0.00599106	0.015186	0.32809	0.259653	0.208167	N.D.	N.D.	0.00534243
IC-QE	dTTP (13C+5; 0%)	1.07246	1.18151	0.901383	0.0103191	0.00778724	0.0161209	5.9864	4.97001	4.87004	0.411455	0.421798	0.41897	8.8071	8.43391	7.15294	0.394442	0.456837	0.409977
IC-QE	dTTP (13C+6; 0%)	0.109112	0.0648188	0.0739977	N.D.	N.D.	N.D.	0.673269	0.617185	0.685443	N.D.	N.D.	N.D.	1.70379	1.61392	1.30257	N.D.	N.D.	N.D.
IC-QE	dTTP (13C+7; 0%)	N.D.	N.D.	N.D.	N.D.	N.D.	N.D.	0.109155	0.18789	0.150146	N.D.	N.D.	N.D.	0.923366	0.769167	0.731003	N.D.	N.D.	N.D.
IC-QE	dTTP (13C+8; 0%)	N.D.	N.D.	N.D.	N.D.	N.D.	N.D.	0.0310611	0.033072	0.0240568	N.D.	N.D.	N.D.	0.300226	0.232379	0.217746	N.D.	N.D.	N.D.
IC-QE	dTTP (13C+9; 0%)	N.D.	N.D.	N.D.	N.D.	N.D.	N.D.	N.D.	N.D.	N.D.	N.D.	N.D.	N.D.	0.0103616	N.D.	0.00807994	N.D.	N.D.	N.D.
IC-QE	dTTP (13C+10; 0%)	N.D.	N.D.	N.D.	N.D.	N.D.	N.D.	N.D.	N.D.	N.D.	N.D.	N.D.	N.D.	N.D.	N.D.	N.D.	N.D.	N.D.	N.D.
IC-QE	dUDP	N.D.	N.D.	N.D.	N.D.	N.D.	N.D.	N.D.	N.D.	N.D.	N.D.	N.D.	N.D.	N.D.	N.D.	N.D.	N.D.	N.D.	N.D.
IC-QE	dUDP (13C+1; 9.7%)	N.D.	N.D.	N.D.	N.D.	N.D.	N.D.	N.D.	N.D.	N.D.	N.D.	N.D.	N.D.	N.D.	N.D.	N.D.	N.D.	N.D.	N.D.
IC-QE	dUDP (13C+2; 0.4%)	N.D.	N.D.	N.D.	N.D.	N.D.	N.D.	N.D.	N.D.	N.D.	N.D.	N.D.	N.D.	N.D.	N.D.	N.D.	N.D.	N.D.	N.D.
IC-QE	dUDP (13C+3; 0%)	N.D.	N.D.	N.D.	N.D.	N.D.	N.D.	N.D.	N.D.	N.D.	N.D.	N.D.	N.D.	N.D.	N.D.	N.D.	N.D.	N.D.	N.D.
IC-QE	dUDP (13C+4; 0%)	N.D.	N.D.	N.D.	N.D.	N.D.	N.D.	N.D.	N.D.	N.D.	N.D.	N.D.	N.D.	N.D.	N.D.	N.D.	N.D.	N.D.	N.D.
IC-QE	dUDP (13C+5; 0%)	N.D.	N.D.	N.D.	N.D.	N.D.	N.D.	N.D.	N.D.	N.D.	N.D.	N.D.	N.D.	N.D.	N.D.	N.D.	N.D.	N.D.	N.D.
IC-QE	dUDP (13C+6; 0%)	N.D.	N.D.	N.D.	N.D.	N.D.	N.D.	N.D.	N.D.	N.D.	N.D.	N.D.	N.D.	N.D.	N.D.	N.D.	N.D.	N.D.	N.D.
IC-QE	dUDP (13C+7; 0%)	N.D.	N.D.	N.D.	N.D.	N.D.	N.D.	N.D.	N.D.	N.D.	N.D.	N.D.	N.D.	N.D.	N.D.	N.D.	N.D.	N.D.	N.D.
IC-QE	dUDP (13C+8; 0%)	N.D.	N.D.	N.D.	N.D.	N.D.	N.D.	N.D.	N.D.	N.D.	N.D.	N.D.	N.D.	N.D.	N.D.	N.D.	N.D.	N.D.	N.D.
IC-QE	dUDP (13C+9; 0%)	N.D.	N.D.	N.D.	N.D.	N.D.	N.D.	N.D.	N.D.	N.D.	N.D.	N.D.	N.D.	N.D.	N.D.	N.D.	N.D.	N.D.	N.D.
IC-QE	dUMP	0.235181	0.310701	0.222809	0.298824	0.31937	0.349704	0.305012	0.515414	0.447494	0.2543	0.361367	0.19092	0.15281	0.294572	0.138463	0.10652	0.135664	0.0969745
IC-QE	dUMP (13C+1; 9.7%)	N.D.	N.D.	N.D.	N.D.	N.D.	N.D.	N.D.	N.D.	N.D.	N.D.	N.D.	N.D.	N.D.	N.D.	N.D.	N.D.	N.D.	N.D.
IC-QE	dUMP (13C+2; 0.4%)	N.D.	N.D.	N.D.	N.D.	N.D.	N.D.	N.D.	N.D.	N.D.	N.D.	N.D.	N.D.	N.D.	N.D.	N.D.	N.D.	N.D.	N.D.
IC-QE	dUMP (13C+3; 0%)	N.D.	N.D.	N.D.	N.D.	N.D.	N.D.	N.D.	N.D.	N.D.	N.D.	N.D.	N.D.	N.D.	N.D.	N.D.	N.D.	N.D.	N.D.
IC-QE	dUMP (13C+4; 0%)	N.D.	N.D.	N.D.	N.D.	N.D.	N.D.	N.D.	N.D.	N.D.	N.D.	N.D.	N.D.	N.D.	N.D.	N.D.	N.D.	N.D.	N.D.
IC-QE	dUMP (13C+5; 0%)	N.D.	N.D.	N.D.	N.D.	N.D.	N.D.	0.100665	0.18941	0.142015	0.0248901	0.00425506	0.00680454	0.170367	0.231365	0.178981	0.0146787	0.0125674	0.00235822
IC-QE	dUMP (13C+6; 0%)	N.D.	N.D.	N.D.	N.D.	N.D.	N.D.	N.D.	N.D.	N.D.	N.D.	N.D.	N.D.	N.D.	N.D.	N.D.	N.D.	N.D.	N.D.
IC-QE	dUMP (13C+7; 0%)	N.D.	N.D.	N.D.	N.D.	N.D.	N.D.	N.D.	N.D.	N.D.	N.D.	N.D.	N.D.	N.D.	N.D.	N.D.	N.D.	N.D.	N.D.
IC-QE	dUMP (13C+8; 0%)	N.D.	N.D.	N.D.	N.D.	N.D.	N.D.	N.D.	N.D.	N.D.	N.D.	N.D.	N.D.	N.D.	N.D.	N.D.	N.D.	N.D.	N.D.
IC-QE	dUMP (13C+9; 0%)	N.D.	N.D.	N.D.	N.D.	N.D.	N.D.	N.D.	N.D.	N.D.	N.D.	N.D.	N.D.	N.D.	N.D.	N.D.	N.D.	N.D.	N.D.
IC-QE	F1,6P	3.06706	2.65375	2.5925	3.53208	3.8533	2.48863	1.33234	1.38292	1.51929	1.11788	1.19799	1.35115	1.25394	1.15728	0.889093	0.846856	0.757671	0.997085
IC-QE	F1,6P (13C+1; 6.5%)	0.2141	0.188165	0.189109	0.20968	0.269559	0.174139	0.0889252	0.05456	0.0779901	0.0800163	0.107918	0.0592608	0.0726193	0.048852	0.0418834	0.0677256	0.0607665	0.0309076
IC-QE	F1,6P (13C+2; 0.2%)	N.D.	N.D.	N.D.	N.D.	N.D.	N.D.	N.D.	N.D.	N.D.	N.D.	N.D.	N.D.	N.D.	N.D.	N.D.	N.D.	N.D.	N.D.
IC-QE	F1,6P (13C+3; 0%)	2.09753	0.263934	0.139914	0.0144973	0.0166882	0.0082656	N.D.	N.D.	N.D.	N.D.	N.D.	N.D.	N.D.	N.D.	N.D.	N.D.	N.D.	N.D.
IC-QE	F1,6P (13C+4; 0%)	N.D.	N.D.	N.D.	N.D.	N.D.	N.D.	N.D.	N.D.	N.D.	N.D.	N.D.	N.D.	N.D.	N.D.	N.D.	N.D.	N.D.	N.D.
IC-QE	F1,6P (13C+5; 0%)	N.D.	N.D.	N.D.	N.D.	N.D.	N.D.	N.D.	N.D.	N.D.	N.D.	N.D.	N.D.	N.D.	N.D.	N.D.	N.D.	N.D.	N.D.
IC-QE	F1,6P (13C+6; 0%)	28.1661	7.14165	5.62058	3.03341	2.99587	2.50467	4.16704	3.86887	3.2039	2.5798	2.64078	2.00013	3.43595	2.97983	2.44155	1.6398	1.55222	1.77313
IC-QE	F6P	30.2339	43.4983	38.4535	590.312	660.799	512.772	114.526	120.151	104.895	584.185	883.565	798.876	163.301	198.344	160.177	646.548	636.746	597.232
IC-QE	F6P (13C+1; 6.5%)	2.18553	3.03223	2.54869	42.8216	48.4928	37.6608	7.33875	7.4198	6.1605	61.4524	59.2936	44.5979	10.8876	13.0955	9.55119	33.0709	34.5098	32.5943
IC-QE	F6P (13C+2; 0.2%)	N.D.	N.D.	N.D.	N.D.	N.D.	N.D.	N.D.	N.D.	N.D.	N.D.	N.D.	N.D.	N.D.	N.D.	N.D.	N.D.	N.D.	N.D.
IC-QE	F6P (13C+3; 0%)	N.D.	N.D.	N.D.	N.D.	N.D.	N.D.	N.D.	N.D.	N.D.	N.D.	N.D.	N.D.	N.D.	N.D.	N.D.	N.D.	N.D.	N.D.
IC-QE	F6P (13C+4; 0%)	N.D.	N.D.	N.D.	N.D.	N.D.	N.D.	N.D.	N.D.	N.D.	N.D.	N.D.	N.D.	N.D.	N.D.	N.D.	N.D.	N.D.	N.D.
IC-QE	F6P (13C+5; 0%)	0.0443233	0.0344518	0.0314617	0.0109419	N.D.	0.0477731	0.458237	0.400038	0.374154	N.D.	N.D.	N.D.	0.528847	0.80541	0.567004	N.D.	0.0398622	N.D.
IC-QE	F6P (13C+6; 0%)	1.94389	2.54035	1.91192	1.62338	1.54252	1.53821	10.7143	11.7213	10.3995	2.36932	2.48348	2.2155	16.3972	20.5564	15.4576	2.4092	2.31949	2.0726
IC-QE	FAD	1.40049	2.44793	2.49227	3.98217	3.55827	3.51411	3.81183	2.3896	4.05532	4.58394	4.28189	4.7674	1.59511	2.04863	2.7978	4.53979	5.28199	4.61491
IC-QE	FAD (13C+1; 29.2%)	0.171564	0.56065	0.428947	0.524233	0.588654	0.265242	0.62307	0.260722	0.370293	0.745585	0.73863	1.14437	0.177852	N.D.	0.47636	0.412837	0.338642	0.650922
IC-QE	FAD (13C+2; 4.1%)	N.D.	N.D.	N.D.	N.D.	N.D.	N.D.	N.D.	N.D.	N.D.	N.D.	N.D.	N.D.	N.D.	N.D.	N.D.	N.D.	N.D.	N.D.
IC-QE	FAD (13C+3; 0.4%)	N.D.	N.D.	N.D.	N.D.	N.D.	N.D.	N.D.	N.D.	N.D.	N.D.	N.D.	N.D.	N.D.	N.D.	N.D.	N.D.	N.D.	N.D.
IC-QE	FAD (13C+4; 0%)	N.D.	N.D.	N.D.	N.D.	N.D.	N.D.	N.D.	N.D.	N.D.	N.D.	N.D.	N.D.	N.D.	N.D.	N.D.	N.D.	N.D.	N.D.
IC-QE	FAD (13C+5; 0%)	N.D.	N.D.	N.D.	N.D.	N.D.	N.D.	N.D.	N.D.	N.D.	N.D.	N.D.	N.D.	N.D.	N.D.	N.D.	N.D.	N.D.	N.D.
IC-QE	FAD (13C+6; 0%)	N.D.	N.D.	N.D.	N.D.	N.D.	N.D.	N.D.	N.D.	N.D.	N.D.	N.D.	N.D.	N.D.	N.D.	N.D.	N.D.	N.D.	N.D.
IC-QE	FAD (13C+7; 0%)	N.D.	N.D.	N.D.	N.D.	N.D.	N.D.	N.D.	N.D.	N.D.	N.D.	N.D.	N.D.	N.D.	N.D.	N.D.	N.D.	N.D.	N.D.
IC-QE	FAD (13C+8; 0%)	N.D.	N.D.	N.D.	N.D.	N.D.	N.D.	N.D.	N.D.	N.D.	N.D.	N.D.	N.D.	N.D.	N.D.	N.D.	N.D.	N.D.	N.D.
IC-QE	FAD (13C+9; 0%)	N.D.	N.D.	N.D.	N.D.	N.D.	N.D.	N.D.	N.D.	N.D.	N.D.	N.D.	N.D.	N.D.	N.D.	N.D.	N.D.	N.D.	N.D.
IC-QE	FAD (13C+10; 0%)	N.D.	N.D.	N.D.	N.D.	N.D.	N.D.	N.D.	N.D.	N.D.	N.D.	N.D.	N.D.	N.D.	N.D.	N.D.	N.D.	N.D.	N.D.
IC-QE	FAD (13C+11; 0%)	N.D.	N.D.	N.D.	N.D.	N.D.	N.D.	N.D.	N.D.	N.D.	N.D.	N.D.	N.D.	N.D.	N.D.	N.D.	N.D.	N.D.	N.D.
IC-QE	FAD (13C+12; 0%)	N.D.	N.D.	N.D.	N.D.	N.D.	N.D.	N.D.	N.D.	N.D.	N.D.	N.D.	N.D.	N.D.	N.D.	N.D.	N.D.	N.D.	N.D.
IC-QE	FAD (13C+13; 0%)	N.D.	N.D.	N.D.	N.D.	N.D.	N.D.	N.D.	N.D.	N.D.	N.D.	N.D.	N.D.	N.D.	N.D.	N.D.	N.D.	N.D.	N.D.
IC-QE	FAD (13C+14; 0%)	N.D.	N.D.	N.D.	N.D.	N.D.	N.D.	N.D.	N.D.	N.D.	N.D.	N.D.	N.D.	N.D.	N.D.	N.D.	N.D.	N.D.	N.D.
IC-QE	FAD (13C+15; 0%)	N.D.	N.D.	N.D.	N.D.	N.D.	N.D.	N.D.	N.D.	N.D.	N.D.	N.D.	N.D.	N.D.	N.D.	N.D.	N.D.	N.D.	N.D.
IC-QE	FAD (13C+16; 0%)	N.D.	N.D.	N.D.	N.D.	N.D.	N.D.	N.D.	N.D.	N.D.	N.D.	N.D.	N.D.	N.D.	N.D.	N.D.	N.D.	N.D.	N.D.
IC-QE	FAD (13C+17; 0%)	N.D.	N.D.	N.D.	N.D.	N.D.	N.D.	N.D.	N.D.	N.D.	N.D.	N.D.	N.D.	N.D.	N.D.	N.D.	N.D.	N.D.	N.D.
IC-QE	FAD (13C+18; 0%)	N.D.	N.D.	N.D.	N.D.	N.D.	N.D.	N.D.	N.D.	N.D.	N.D.	N.D.	N.D.	N.D.	N.D.	N.D.	N.D.	N.D.	N.D.
IC-QE	FAD (13C+19; 0%)	N.D.	N.D.	N.D.	N.D.	N.D.	N.D.	N.D.	N.D.	N.D.	N.D.	N.D.	N.D.	N.D.	N.D.	N.D.	N.D.	N.D.	N.D.
IC-QE	FAD (13C+20; 0%)	N.D.	N.D.	N.D.	N.D.	N.D.	N.D.	N.D.	N.D.	N.D.	N.D.	N.D.	N.D.	N.D.	N.D.	N.D.	N.D.	N.D.	N.D.
IC-QE	FAD (13C+21; 0%)	N.D.	N.D.	N.D.	N.D.	N.D.	N.D.	N.D.	N.D.	N.D.	N.D.	N.D.	N.D.	N.D.	N.D.	N.D.	N.D.	N.D.	N.D.
IC-QE	FAD (13C+22; 0%)	N.D.	N.D.	N.D.	N.D.	N.D.	N.D.	N.D.	N.D.	N.D.	N.D.	N.D.	N.D.	N.D.	N.D.	N.D.	N.D.	N.D.	N.D.
IC-QE	FAD (13C+23; 0%)	N.D.	N.D.	N.D.	N.D.	N.D.	N.D.	N.D.	N.D.	N.D.	N.D.	N.D.	N.D.	N.D.	N.D.	N.D.	N.D.	N.D.	N.D.
IC-QE	FAD (13C+24; 0%)	N.D.	N.D.	N.D.	N.D.	N.D.	N.D.	N.D.	N.D.	N.D.	N.D.	N.D.	N.D.	N.D.	N.D.	N.D.	N.D.	N.D.	N.D.
IC-QE	FAD (13C+25; 0%)	N.D.	N.D.	N.D.	N.D.	N.D.	N.D.	N.D.	N.D.	N.D.	N.D.	N.D.	N.D.	N.D.	N.D.	N.D.	N.D.	N.D.	N.D.
IC-QE	FAD (13C+26; 0%)	N.D.	N.D.	N.D.	N.D.	N.D.	N.D.	N.D.	N.D.	N.D.	N.D.	N.D.	N.D.	N.D.	N.D.	N.D.	N.D.	N.D.	N.D.
IC-QE	FAD (13C+27; 0%)	N.D.	N.D.	N.D.	N.D.	N.D.	N.D.	N.D.	N.D.	N.D.	N.D.	N.D.	N.D.	N.D.	N.D.	N.D.	N.D.	N.D.	N.D.
IC-QE	Fructose 1P	36.2704	44.3914	39.2641	30.6336	29.3259	25.8035	2.79967	3.16561	2.8618	6.73408	6.60732	5.78521	0.982192	0.949975	1.01291	1.6051	1.22151	1.34151
IC-QE	Fructose 1P (13C+1; 6.5%)	2.04081	2.43829	2.21244	1.708	1.66506	1.50773	N.D.	N.D.	0.0887145	0.40801	0.380102	N.D.	N.D.	N.D.	N.D.	N.D.	N.D.	N.D.
IC-QE	Fructose 1P (13C+2; 0.2%)	N.D.	N.D.	N.D.	N.D.	N.D.	N.D.	N.D.	N.D.	N.D.	N.D.	N.D.	N.D.	N.D.	N.D.	N.D.	N.D.	N.D.	N.D.
IC-QE	Fructose 1P (13C+3; 0%)	0.0231565	0.0282853	0.0171871	N.D.	N.D.	N.D.	N.D.	N.D.	N.D.	N.D.	N.D.	N.D.	N.D.	N.D.	N.D.	N.D.	N.D.	N.D.
IC-QE	Fructose 1P (13C+4; 0%)	N.D.	N.D.	N.D.	N.D.	N.D.	N.D.	N.D.	N.D.	N.D.	N.D.	N.D.	N.D.	N.D.	N.D.	N.D.	N.D.	N.D.	N.D.
IC-QE	Fructose 1P (13C+5; 0%)	0.436693	0.577459	0.547059	N.D.	N.D.	N.D.	0.62605	0.74174	0.670288	0.157478	0.09579	0.109966	0.77811	0.77561	0.730208	0.130232	0.0732722	0.120992
IC-QE	Fructose 1P (13C+6; 0%)	13.0708	15.635	13.8457	1.14304	1.00035	0.97328	12.528	14.1033	13.7343	3.61866	3.54195	3.56135	8.8858	8.57178	7.91042	3.69995	3.01466	3.37924
IC-QE	Fumarate	89.633	93.7056	81.665	84.5852	105.915	87.4026	139.391	158.425	162.093	101.865	87.0392	81.4281	150.662	164.265	138.942	75.8303	72.4741	80.3755
IC-QE	Fumarate (13C+1; 4.3%)	3.93606	4.00245	3.56467	3.52928	4.56817	3.79069	7.15999	8.10403	8.53867	6.04888	5.13356	4.78956	9.13365	9.97543	8.10247	5.30393	4.67822	5.37609
IC-QE	Fumarate (13C+2; 0.1%)	0.98238	1.05454	1.00964	1.61162	1.99901	1.68123	22.3433	25.7709	29.0713	7.21007	5.78059	5.7315	40.0477	43.61	36.1834	6.7816	5.98848	7.05916
IC-QE	Fumarate (13C+3; 0%)	1.51065	1.26398	1.03602	0.0113018	0.0169089	0.0136281	8.30256	8.462	10.5279	0.547767	0.42873	0.416169	17.4182	18.8441	15.46	0.732585	0.692672	0.759699
IC-QE	Fumarate (13C+4; 0%)	N.D.	N.D.	N.D.	N.D.	N.D.	N.D.	0.904376	0.976476	1.38497	N.D.	N.D.	N.D.	3.75373	4.29307	3.31038	N.D.	N.D.	N.D.
IC-QE	G3P	N.D.	N.D.	N.D.	N.D.	N.D.	N.D.	N.D.	N.D.	N.D.	N.D.	N.D.	N.D.	N.D.	N.D.	N.D.	N.D.	N.D.	N.D.
IC-QE	G3P (13C+1; 3.2%)	N.D.	N.D.	N.D.	N.D.	N.D.	N.D.	N.D.	N.D.	N.D.	N.D.	N.D.	N.D.	N.D.	N.D.	N.D.	N.D.	N.D.	N.D.
IC-QE	G3P (13C+2; 0%)	N.D.	N.D.	N.D.	N.D.	N.D.	N.D.	N.D.	N.D.	N.D.	N.D.	N.D.	N.D.	N.D.	N.D.	N.D.	N.D.	N.D.	N.D.
IC-QE	G3P (13C+3; 0%)	N.D.	N.D.	N.D.	N.D.	N.D.	N.D.	N.D.	N.D.	N.D.	N.D.	N.D.	N.D.	N.D.	N.D.	N.D.	N.D.	N.D.	N.D.
IC-QE	G6P	1.33423	2.16107	1.88639	44.9211	45.9904	43.9172	6.81475	13.2396	5.25494	61.6404	79.1654	65.254	10.4485	12.7295	5.36187	62.8104	43.1461	67.387
IC-QE	G6P (13C+1; 6.5%)	0.0595434	0.102193	0.0953238	3.53803	2.76319	1.97707	0.400762	0.813101	0.274857	3.57703	4.96126	4.09145	0.816619	0.841804	0.296674	3.8418	2.72127	3.91165
IC-QE	G6P (13C+2; 0.2%)	N.D.	N.D.	N.D.	N.D.	N.D.	N.D.	N.D.	N.D.	N.D.	N.D.	N.D.	N.D.	N.D.	N.D.	N.D.	N.D.	N.D.	N.D.
IC-QE	G6P (13C+3; 0%)	N.D.	N.D.	N.D.	N.D.	N.D.	N.D.	N.D.	N.D.	N.D.	N.D.	N.D.	N.D.	N.D.	N.D.	N.D.	N.D.	N.D.	N.D.
IC-QE	G6P (13C+4; 0%)	N.D.	N.D.	N.D.	N.D.	N.D.	N.D.	N.D.	N.D.	N.D.	N.D.	N.D.	N.D.	N.D.	N.D.	N.D.	N.D.	N.D.	N.D.
IC-QE	G6P (13C+5; 0%)	0.0757959	0.0593438	0.0187403	0.378029	0.339377	0.344797	N.D.	0.0535291	0.0439633	0.411395	0.408572	0.437232	0.109856	0.0736236	0.04645	0.354602	0.363462	0.373451
IC-QE	G6P (13C+6; 0%)	3.10491	2.32474	1.77105	10.8404	10.7003	9.76354	3.43026	3.48769	2.76478	11.558	12.0286	11.4675	3.65533	3.57801	3.02658	9.85194	9.97315	10.5771
IC-QE	GDP	23.3471	36.8248	32.1877	31.3831	41.1438	27.7138	17.9501	15.9147	20.5778	30.1376	31.0012	34.3568	10.9866	12.3068	8.99615	26.1848	25.4309	28.8753
IC-QE	GDP (13C+1; 10.8%)	2.14036	3.47805	2.91566	3.01914	3.73531	2.55256	1.65934	1.72751	2.04221	2.73405	2.81786	3.11926	0.98751	1.15971	0.884535	2.39459	2.26191	2.66091
IC-QE	GDP (13C+2; 0.5%)	0.273831	0.514949	0.417728	0.28596	0.303441	0.0935154	0.140084	0.246631	0.226854	0.492877	0.305572	0.411041	0.139016	0.11359	0.10163	0.309515	0.414679	0.392301
IC-QE	GDP (13C+3; 0%)	0.0136707	0.0457274	0.0241087	N.D.	N.D.	N.D.	0.0320185	0.0352009	0.0706844	0.0745526	0.0591148	0.0965981	0.0908941	0.0963013	0.0737534	0.0821711	0.0893339	0.0900775
IC-QE	GDP (13C+4; 0%)	0.079894	0.157246	0.181955	N.D.	N.D.	N.D.	0.7524	0.802431	0.848249	0.0540169	0.0143188	0.02706	1.07111	1.34407	0.922861	0.0467998	0.0916975	0.122732
IC-QE	GDP (13C+5; 0%)	4.21586	7.27548	6.52256	0.206462	0.28537	0.259931	24.9092	23.6853	27.9052	3.26789	3.2895	3.54605	34.3408	39.6922	28.0552	5.34155	5.48551	6.00511
IC-QE	GDP (13C+6; 0%)	0.305871	0.53896	0.533933	N.D.	N.D.	N.D.	2.73646	2.59919	2.99159	0.0664013	0.0435456	0.0745132	4.30494	5.39992	3.94574	0.122801	0.173346	0.22818
IC-QE	GDP (13C+7; 0%)	0.0144382	0.0130565	0.0343148	N.D.	N.D.	N.D.	0.548611	0.393196	0.653788	N.D.	N.D.	N.D.	0.900845	1.13017	0.761313	N.D.	0.0111964	0.020327
IC-QE	GDP (13C+8; 0%)	N.D.	N.D.	N.D.	N.D.	N.D.	N.D.	0.0189335	N.D.	0.0145295	N.D.	N.D.	N.D.	0.0444046	0.0481707	0.0184435	N.D.	N.D.	N.D.
IC-QE	GDP (13C+9; 0%)	N.D.	N.D.	N.D.	N.D.	N.D.	N.D.	N.D.	N.D.	N.D.	N.D.	N.D.	N.D.	N.D.	N.D.	N.D.	N.D.	N.D.	N.D.
IC-QE	GDP (13C+10; 0%)	N.D.	N.D.	N.D.	N.D.	N.D.	N.D.	N.D.	N.D.	N.D.	N.D.	N.D.	N.D.	N.D.	N.D.	N.D.	N.D.	N.D.	N.D.
IC-QE	GDP-mannose	12.2883	13.7668	11.4978	32.5816	37.8854	31.1276	8.5898	7.26254	8.56224	41.9483	52.4987	51.5588	4.80554	4.95807	4.51065	47.1124	55.954	50.8941
IC-QE	GDP-mannose (13C+1; 17.3%)	1.89965	2.15137	1.74209	5.21425	5.84455	4.74013	1.34836	1.40826	1.2377	6.30444	8.68771	8.21178	0.840495	0.7733	0.80355	7.74306	8.92752	8.8553
IC-QE	GDP-mannose (13C+2; 1.4%)	0.623291	0.581113	0.524969	1.0449	1.08601	0.987383	0.251596	0.262124	0.178108	1.2793	1.68056	1.70433	0.100129	0.105218	0.122212	1.45046	1.94637	1.80443
IC-QE	GDP-mannose (13C+3; 0.1%)	0.0569212	0.0563847	0.0288101	0.0732828	0.137033	0.132446	0.0597266	0.0418031	0.00535592	0.384873	0.242687	0.313218	N.D.	N.D.	N.D.	0.46753	0.598219	0.485325
IC-QE	GDP-mannose (13C+4; 0%)	0.0231107	0.0402081	0.0168649	N.D.	N.D.	N.D.	0.321657	0.32771	0.280565	0.0808309	0.103887	0.231077	0.503168	0.393762	0.424815	0.357654	0.49986	0.355991
IC-QE	GDP-mannose (13C+5; 0%)	2.40712	2.85359	2.3852	0.369301	0.3739	0.307004	11.7419	11.6837	11.8228	4.87172	6.45983	6.15714	15.8952	16.032	14.63	11.0229	13.7368	12.2244
IC-QE	GDP-mannose (13C+6; 0%)	0.794932	0.930994	0.808416	N.D.	N.D.	0.0161229	2.85254	2.85443	2.89886	0.524221	0.661986	0.600304	3.66822	3.77461	3.50569	1.23774	1.68272	1.50434
IC-QE	GDP-mannose (13C+7; 0%)	0.0508627	0.0748328	0.0481995	N.D.	N.D.	N.D.	0.484225	0.532223	0.467329	0.0371619	0.0685379	0.0585645	0.683742	0.853888	0.837719	0.236426	0.375819	0.176592
IC-QE	GDP-mannose (13C+8; 0%)	N.D.	N.D.	N.D.	N.D.	N.D.	N.D.	0.0182744	N.D.	N.D.	N.D.	N.D.	N.D.	0.0563802	0.0421036	0.0362485	N.D.	N.D.	N.D.
IC-QE	GDP-mannose (13C+9; 0%)	N.D.	N.D.	N.D.	N.D.	N.D.	N.D.	N.D.	N.D.	N.D.	N.D.	N.D.	N.D.	N.D.	N.D.	N.D.	N.D.	N.D.	N.D.
IC-QE	GDP-mannose (13C+10; 0%)	N.D.	N.D.	N.D.	N.D.	N.D.	N.D.	N.D.	N.D.	N.D.	N.D.	N.D.	N.D.	0.0548198	N.D.	N.D.	N.D.	N.D.	N.D.
IC-QE	GDP-mannose (13C+11; 0%)	0.0271998	0.0460959	0.0480546	N.D.	N.D.	N.D.	1.07859	0.909907	0.951288	N.D.	N.D.	N.D.	1.39623	1.40945	1.33637	N.D.	N.D.	N.D.
IC-QE	GDP-mannose (13C+12; 0%)	N.D.	N.D.	N.D.	N.D.	N.D.	N.D.	0.0158791	0.0596057	0.108306	N.D.	N.D.	N.D.	0.146218	0.110788	0.0845798	N.D.	N.D.	N.D.
IC-QE	GDP-mannose (13C+13; 0%)	N.D.	N.D.	N.D.	N.D.	N.D.	N.D.	N.D.	N.D.	N.D.	N.D.	N.D.	N.D.	0.0257159	N.D.	N.D.	N.D.	N.D.	N.D.
IC-QE	GDP-mannose (13C+14; 0%)	N.D.	N.D.	N.D.	N.D.	N.D.	N.D.	N.D.	N.D.	N.D.	N.D.	N.D.	N.D.	N.D.	N.D.	N.D.	N.D.	N.D.	N.D.
IC-QE	GDP-mannose (13C+15; 0%)	N.D.	N.D.	N.D.	N.D.	N.D.	N.D.	N.D.	N.D.	N.D.	N.D.	N.D.	N.D.	N.D.	N.D.	N.D.	N.D.	N.D.	N.D.
IC-QE	GDP-mannose (13C+16; 0%)	N.D.	N.D.	N.D.	N.D.	N.D.	N.D.	N.D.	N.D.	N.D.	N.D.	N.D.	N.D.	N.D.	N.D.	N.D.	N.D.	N.D.	N.D.
IC-QE	Gluconate	88.0421	105.67	107.091	111.033	125.521	113.419	117.215	126.769	142.496	125.843	137.833	137.082	119.118	136.582	108.172	128.141	130.453	135.445
IC-QE	Gluconate (13C+1; 6.5%)	5.5116	6.36532	6.59378	6.89736	7.82528	7.04097	7.12492	7.77678	8.73138	7.84381	8.6935	8.59577	7.31764	8.48043	6.81342	8.02925	8.43505	8.53894
IC-QE	Gluconate (13C+2; 0.2%)	0.0216646	0.0331839	0.054403	N.D.	N.D.	N.D.	N.D.	0.0509606	0.0497901	N.D.	N.D.	N.D.	0.056884	N.D.	N.D.	N.D.	N.D.	N.D.
IC-QE	Gluconate (13C+3; 0%)	N.D.	N.D.	N.D.	N.D.	N.D.	N.D.	N.D.	N.D.	N.D.	N.D.	N.D.	N.D.	N.D.	N.D.	N.D.	N.D.	N.D.	N.D.
IC-QE	Gluconate (13C+4; 0%)	N.D.	N.D.	N.D.	N.D.	N.D.	N.D.	N.D.	N.D.	N.D.	N.D.	N.D.	N.D.	N.D.	N.D.	N.D.	N.D.	N.D.	N.D.
IC-QE	Gluconate (13C+5; 0%)	0.144511	0.159757	0.219009	N.D.	N.D.	N.D.	0.753005	0.802794	0.90432	N.D.	N.D.	N.D.	1.31106	1.44557	1.13656	N.D.	N.D.	N.D.
IC-QE	Gluconate (13C+6; 0%)	1.1964	1.35568	1.69306	0.139143	0.119274	0.119199	8.32462	9.40066	9.88728	0.912124	0.999882	1.05597	22.9455	25.7386	19.5899	1.90505	1.89819	1.84676
IC-QE	Glucosamine 6-phosphate	N.D.	N.D.	N.D.	N.D.	N.D.	N.D.	N.D.	N.D.	N.D.	N.D.	N.D.	N.D.	N.D.	N.D.	N.D.	N.D.	N.D.	N.D.
IC-QE	Glucosamine 6-phosphate (13C+1; 6.5%)	N.D.	N.D.	N.D.	N.D.	N.D.	N.D.	N.D.	N.D.	N.D.	N.D.	N.D.	N.D.	N.D.	N.D.	N.D.	N.D.	N.D.	N.D.
IC-QE	Glucosamine 6-phosphate (13C+2; 0.2%)	N.D.	N.D.	N.D.	N.D.	N.D.	N.D.	N.D.	N.D.	N.D.	N.D.	N.D.	N.D.	N.D.	N.D.	N.D.	N.D.	N.D.	N.D.
IC-QE	Glucosamine 6-phosphate (13C+3; 0%)	N.D.	N.D.	N.D.	N.D.	N.D.	N.D.	N.D.	N.D.	N.D.	N.D.	N.D.	N.D.	N.D.	N.D.	N.D.	N.D.	N.D.	N.D.
IC-QE	Glucosamine 6-phosphate (13C+4; 0%)	N.D.	N.D.	N.D.	N.D.	N.D.	N.D.	N.D.	N.D.	N.D.	N.D.	N.D.	N.D.	N.D.	N.D.	N.D.	N.D.	N.D.	N.D.
IC-QE	Glucosamine 6-phosphate (13C+5; 0%)	N.D.	N.D.	N.D.	N.D.	N.D.	N.D.	N.D.	N.D.	N.D.	N.D.	N.D.	N.D.	N.D.	N.D.	N.D.	N.D.	N.D.	N.D.
IC-QE	Glucosamine 6-phosphate (13C+6; 0%)	N.D.	N.D.	N.D.	N.D.	N.D.	N.D.	N.D.	N.D.	N.D.	N.D.	N.D.	N.D.	N.D.	N.D.	N.D.	N.D.	N.D.	N.D.
IC-QE	Glycerophosphate	23.0483	23.8093	18.9526	12.1891	14.7048	13.7479	33.5596	39.1386	40.1792	16.0536	20.5842	14.8532	31.9332	33.9069	26.9992	16.0056	14.3297	12.953
IC-QE	Glycerophosphate (13C+1; 3.2%)	0.655044	0.630749	0.478763	0.225733	0.255678	0.253896	0.89251	1.13259	1.06433	0.419167	0.352937	0.284822	0.859531	0.938015	0.725204	0.355559	0.317124	0.231432
IC-QE	Glycerophosphate (13C+2; 0%)	1.43467	1.15192	0.804863	0.034589	N.D.	0.0304454	0.567797	0.638178	0.639221	N.D.	N.D.	N.D.	0.513045	0.465855	0.387727	N.D.	N.D.	N.D.
IC-QE	Glycerophosphate (13C+3; 0%)	62.2373	53.2489	38.6243	2.28096	2.58146	2.51526	27.7611	26.578	28.6201	2.56412	2.96905	2.53074	24.9016	23.4241	18.7587	2.87755	2.19998	2.3317
IC-QE	Glycolate	13.651	22.2195	N.D.	21.9485	23.2825	15.9749	14.875	22.0776	13.105	24.7519	21.8503	21.8769	19.7343	25.2649	16.5714	19.5861	17.4857	17.4335
IC-QE	Glycolate (13C+1; 2.2%)	N.D.	N.D.	N.D.	N.D.	N.D.	N.D.	N.D.	N.D.	N.D.	N.D.	N.D.	N.D.	N.D.	N.D.	N.D.	N.D.	N.D.	N.D.
IC-QE	Glycolate (13C+2; 0%)	N.D.	N.D.	N.D.	N.D.	N.D.	N.D.	N.D.	N.D.	N.D.	N.D.	N.D.	N.D.	N.D.	N.D.	N.D.	N.D.	N.D.	N.D.
IC-QE	GMP	8.32557	16.8667	17.16	17.5027	21.1741	18.9795	11.4673	12.2985	13.8191	13.3139	18.1494	17.3645	6.14187	6.95392	6.59186	11.3496	12.0375	11.1252
IC-QE	GMP (13C+1; 10.8%)	0.787579	1.45013	1.51054	1.59087	2.04882	1.74749	0.955134	1.18604	1.34686	1.135	1.62966	1.67344	0.582338	0.679995	0.58103	0.997246	1.10428	1.15513
IC-QE	GMP (13C+2; 0.5%)	0.0265555	0.0308254	0.065127	0.0391258	0.104553	0.0150228	0.0575267	0.0387048	0.0429296	0.013868	0.0714072	0.0181385	0.0354729	0.0191365	0.0271786	0.0161037	0.00963702	0.0837199
IC-QE	GMP (13C+3; 0%)	N.D.	N.D.	N.D.	N.D.	N.D.	N.D.	N.D.	0.0367834	N.D.	N.D.	N.D.	N.D.	0.0177827	0.0385653	0.0323671	N.D.	N.D.	N.D.
IC-QE	GMP (13C+4; 0%)	0.0247864	0.0378695	0.0903878	N.D.	N.D.	N.D.	0.477027	0.606899	0.618661	N.D.	N.D.	N.D.	0.632056	0.595909	0.628203	N.D.	0.0136294	N.D.
IC-QE	GMP (13C+5; 0%)	1.63475	3.4489	3.83056	0.0680786	0.109602	0.149078	17.1464	18.4324	19.7731	1.20429	1.47788	1.54049	19.8455	21.3267	20.0115	1.84683	2.14945	1.97398
IC-QE	GMP (13C+6; 0%)	0.132147	0.235971	0.30555	N.D.	N.D.	N.D.	1.8506	1.89847	2.37156	N.D.	N.D.	N.D.	2.47225	3.03831	2.72429	0.0182035	0.0379563	0.0229857
IC-QE	GMP (13C+7; 0%)	N.D.	N.D.	N.D.	N.D.	N.D.	N.D.	0.124302	0.153088	0.249373	N.D.	N.D.	N.D.	0.4579	0.440869	0.396637	N.D.	N.D.	N.D.
IC-QE	GMP (13C+8; 0%)	N.D.	N.D.	N.D.	N.D.	N.D.	N.D.	N.D.	N.D.	N.D.	N.D.	N.D.	N.D.	N.D.	N.D.	N.D.	N.D.	N.D.	N.D.
IC-QE	GMP (13C+9; 0%)	N.D.	N.D.	N.D.	N.D.	N.D.	N.D.	N.D.	N.D.	N.D.	N.D.	N.D.	N.D.	N.D.	N.D.	N.D.	N.D.	N.D.	N.D.
IC-QE	GMP (13C+10; 0%)	N.D.	N.D.	N.D.	N.D.	N.D.	N.D.	N.D.	N.D.	N.D.	N.D.	N.D.	N.D.	N.D.	N.D.	N.D.	N.D.	N.D.	N.D.
IC-QE	GTP	109.66	126.114	90.7961	77.3188	76.8094	59.0115	49.0492	49.7638	42.8221	49.1416	60.8617	64.4981	32.2477	31.6429	23.6659	42.7613	50.7051	53.8636
IC-QE	GTP (13C+1; 10.8%)	12.4962	13.213	10.0025	8.34139	8.67436	6.3246	5.04807	5.01361	4.29219	4.90675	6.37018	7.19424	3.53341	3.46349	2.43029	4.48712	5.27636	5.84031
IC-QE	GTP (13C+2; 0.5%)	1.83844	1.64368	1.203	1.42529	1.02694	0.655167	0.791352	0.424737	0.610869	0.823482	0.634342	0.760527	0.605917	0.396579	0.500824	0.592381	0.932725	1.01338
IC-QE	GTP (13C+3; 0%)	0.361542	0.397756	0.293474	0.0788533	0.150326	0.086287	0.292808	0.334386	0.26138	0.180813	0.224391	0.201312	0.352952	0.233987	0.220396	0.320037	0.346122	0.338314
IC-QE	GTP (13C+4; 0%)	0.888358	1.04929	0.738345	N.D.	N.D.	N.D.	2.01249	2.29834	1.77026	0.134341	0.182503	0.14932	3.314	3.04175	2.17316	0.305613	0.378237	0.316739
IC-QE	GTP (13C+5; 0%)	24.7117	28.6258	21.4158	0.985076	0.866251	0.796349	61.8155	65.2815	53.0278	5.50792	6.82792	7.71524	88.0603	86.4038	64.2906	9.20609	11.5413	12.3469
IC-QE	GTP (13C+6; 0%)	2.35073	2.72193	2.0514	0.0172795	N.D.	N.D.	7.74261	8.35808	6.94227	0.211951	0.290747	0.287192	13.4802	13.2372	9.77833	0.39283	0.622503	0.616987
IC-QE	GTP (13C+7; 0%)	0.0431817	0.531705	0.310851	N.D.	N.D.	N.D.	1.59134	1.58596	1.33708	0.0401162	0.044126	0.0395902	3.11736	3.03025	2.16867	0.0862299	0.119527	0.0874756
IC-QE	GTP (13C+8; 0%)	N.D.	N.D.	N.D.	N.D.	N.D.	N.D.	0.057887	0.0712749	0.0637575	N.D.	N.D.	N.D.	0.197419	0.290735	0.235697	N.D.	N.D.	N.D.
IC-QE	GTP (13C+9; 0%)	N.D.	N.D.	N.D.	N.D.	N.D.	N.D.	N.D.	N.D.	N.D.	N.D.	N.D.	N.D.	N.D.	N.D.	N.D.	N.D.	N.D.	N.D.
IC-QE	GTP (13C+10; 0%)	N.D.	N.D.	N.D.	N.D.	N.D.	N.D.	N.D.	N.D.	N.D.	N.D.	N.D.	N.D.	N.D.	N.D.	N.D.	N.D.	N.D.	N.D.
IC-QE	IMP	0.332321	0.981095	0.870408	0.890798	0.950189	0.680776	0.623913	1.23106	1.4359	0.310375	0.432741	0.295402	0.366581	1.04888	0.553345	0.226568	0.188855	0.247291
IC-QE	IMP (13C+1; 10.8%)	N.D.	0.0432251	N.D.	0.019645	0.0411543	0.0141407	N.D.	0.0475568	0.0861081	N.D.	N.D.	N.D.	N.D.	N.D.	N.D.	N.D.	N.D.	N.D.
IC-QE	IMP (13C+2; 0.5%)	N.D.	N.D.	N.D.	N.D.	N.D.	N.D.	N.D.	N.D.	N.D.	N.D.	N.D.	N.D.	N.D.	N.D.	N.D.	N.D.	N.D.	N.D.
IC-QE	IMP (13C+3; 0%)	N.D.	N.D.	N.D.	N.D.	N.D.	N.D.	N.D.	N.D.	N.D.	N.D.	N.D.	N.D.	N.D.	N.D.	N.D.	N.D.	N.D.	N.D.
IC-QE	IMP (13C+4; 0%)	0.0289189	0.0860509	0.0579555	N.D.	N.D.	N.D.	0.0818556	0.142203	0.131653	N.D.	N.D.	N.D.	0.0702927	0.169116	0.0824795	N.D.	N.D.	N.D.
IC-QE	IMP (13C+5; 0%)	2.5453	4.22987	4.18971	0.316639	0.434168	0.299659	5.6377	7.34332	8.07065	0.246794	0.357849	0.209487	5.18846	7.69718	4.93529	0.423481	0.443216	0.439686
IC-QE	IMP (13C+6; 0%)	0.180018	0.350205	0.361741	N.D.	N.D.	N.D.	0.633105	0.937644	1.20571	N.D.	N.D.	N.D.	0.903713	1.26384	0.81132	N.D.	N.D.	N.D.
IC-QE	IMP (13C+7; 0%)	N.D.	N.D.	N.D.	N.D.	N.D.	N.D.	N.D.	N.D.	N.D.	N.D.	N.D.	N.D.	N.D.	N.D.	N.D.	N.D.	N.D.	N.D.
IC-QE	IMP (13C+8; 0%)	N.D.	N.D.	N.D.	N.D.	N.D.	N.D.	N.D.	N.D.	N.D.	N.D.	N.D.	N.D.	N.D.	N.D.	N.D.	N.D.	N.D.	N.D.
IC-QE	IMP (13C+9; 0%)	N.D.	N.D.	N.D.	N.D.	N.D.	N.D.	N.D.	N.D.	N.D.	N.D.	N.D.	N.D.	N.D.	N.D.	N.D.	N.D.	N.D.	N.D.
IC-QE	IMP (13C+10; 0%)	N.D.	N.D.	N.D.	N.D.	N.D.	N.D.	N.D.	N.D.	N.D.	N.D.	N.D.	N.D.	N.D.	N.D.	N.D.	N.D.	N.D.	N.D.
IC-QE	Isocitrate	0.918004	1.22961	1.19174	7.81786	8.06447	7.95961	2.05826	2.49281	2.68612	9.52396	11.4903	11.0811	2.21216	2.34774	1.91535	10.5337	11.6088	10.8381
IC-QE	Isocitrate (13C+1; 6.5%)	0.0725452	0.105008	0.117955	0.578674	0.640304	0.501128	0.404009	0.4131	0.505808	1.09844	1.58194	1.42899	0.515514	0.483184	0.503724	1.41201	1.69869	1.47074
IC-QE	Isocitrate (13C+2; 0.2%)	3.81606	5.62937	5.67652	3.39736	3.99593	3.29169	15.3278	15.5898	15.9183	3.18409	4.33988	3.74216	17.2202	15.3944	13.6334	3.63227	3.90207	3.42881
IC-QE	Isocitrate (13C+3; 0%)	0.127004	0.204786	0.207249	0.140972	0.130364	0.120409	0.87508	0.875845	1.00853	0.207306	0.304836	0.242363	1.34971	1.17147	1.08203	0.348212	0.353342	0.328272
IC-QE	Isocitrate (13C+4; 0%)	0.0221762	0.0302274	0.0592158	0.0320389	0.0174657	0.0418159	2.5237	2.57622	2.96199	0.146604	0.207704	0.175213	4.5666	4.09082	3.64541	0.209221	0.227922	0.213906
IC-QE	Isocitrate (13C+5; 0%)	0.0410259	0.046823	0.0502886	N.D.	N.D.	N.D.	0.866475	0.885347	1.12178	N.D.	N.D.	N.D.	2.04454	1.75445	1.56034	0.00448984	0.00257369	0.00222418
IC-QE	Isocitrate (13C+6; 0%)	N.D.	N.D.	N.D.	N.D.	N.D.	N.D.	0.0470055	0.0488282	0.11018	N.D.	N.D.	N.D.	0.331602	0.287477	0.240095	N.D.	N.D.	N.D.
IC-QE	Lactate + 3-Hydroxypropionate	280.539	406.764	362.102	350.004	427.89	335.187	414.739	440.986	472.506	468.216	508.313	424.665	450.959	497.084	459.657	428.007	430.463	452.573
IC-QE	Lactate + 3-Hydroxypropionate (13C+1; 3.2%)	11.4655	15.746	14.0177	13.8667	16.737	11.7733	16.7372	18.819	21.2692	19.4219	20.3952	17.7632	19.4815	22.2598	21.2732	19.1936	19.442	20.2197
IC-QE	Lactate + 3-Hydroxypropionate (13C+2; 0%)	44.0761	47.2128	37.8605	4.10419	4.87232	5.0604	33.4882	26.3208	27.0968	7.66949	7.0385	6.53347	24.7159	21.2409	20.3927	7.42346	7.26802	6.72312
IC-QE	Lactate + 3-Hydroxypropionate (13C+3; 0%)	1984.96	2156.46	1664.07	157.827	192.156	185.732	1514.08	1055.19	1047.05	199.082	191.81	167.653	902.776	673.774	639.502	148.701	151.149	134.436
IC-QE	Malate	290.919	340.137	253.931	294.167	366.06	319.406	462.429	527.365	547.207	340.385	346.616	317.65	510.173	557.99	437.922	304.686	289.914	289.737
IC-QE	Malate (13C+1; 4.3%)	13.0351	15.1011	11.334	13.5688	16.9828	14.9092	24.605	28.0963	30.1599	21.3611	21.6868	20.818	32.109	34.9662	27.3842	22.3377	21.0055	20.9856
IC-QE	Malate (13C+2; 0.1%)	3.40333	4.0278	3.51933	6.06623	7.90502	7.07139	75.9978	85.6672	99.642	24.9557	24.9787	24.2281	135.512	150.251	117.242	28.5315	26.3167	26.5919
IC-QE	Malate (13C+3; 0%)	5.21813	5.02735	3.37068	0.234262	0.359232	0.287085	27.432	29.5181	37.0385	2.564	2.49796	2.53974	60.5586	65.0101	50.425	3.86205	3.32826	3.51031
IC-QE	Malate (13C+4; 0%)	N.D.	N.D.	N.D.	N.D.	N.D.	N.D.	3.34146	3.69544	5.35275	N.D.	N.D.	N.D.	13.1939	14.9741	11.4014	0.247687	0.175468	0.178554
IC-QE	Mannose 1P (+G1P)	178.363	209.658	171.216	3530.33	3604.16	3450.28	575.484	667.503	766.097	4732.73	6095.38	4884.75	979.403	1061.27	933.651	4800.47	4652.86	4842.28
IC-QE	Mannose 1P (+G1P) (13C+1; 6.5%)	11.8813	13.3076	11.32	245.87	250.522	242.429	37.9348	45.0111	51.2025	332.515	425.016	344.201	66.7312	72.0803	62.9765	338.205	326.332	337.107
IC-QE	Mannose 1P (+G1P) (13C+2; 0.2%)	N.D.	N.D.	N.D.	N.D.	N.D.	N.D.	N.D.	N.D.	N.D.	N.D.	N.D.	N.D.	N.D.	N.D.	N.D.	N.D.	N.D.	N.D.
IC-QE	Mannose 1P (+G1P) (13C+3; 0%)	N.D.	N.D.	N.D.	N.D.	N.D.	N.D.	N.D.	N.D.	N.D.	N.D.	N.D.	N.D.	N.D.	N.D.	N.D.	N.D.	N.D.	N.D.
IC-QE	Mannose 1P (+G1P) (13C+4; 0%)	N.D.	N.D.	N.D.	N.D.	N.D.	N.D.	0.0112789	0.0323375	0.0241167	N.D.	N.D.	N.D.	0.0317506	0.0442045	0.0181878	N.D.	N.D.	N.D.
IC-QE	Mannose 1P (+G1P) (13C+5; 0%)	0.368581	0.462212	0.361625	N.D.	N.D.	N.D.	2.5972	3.0664	3.51233	0.111148	0.136833	0.184564	4.90729	5.44102	4.65444	0.19329	0.225169	0.226685
IC-QE	Mannose 1P (+G1P) (13C+6; 0%)	9.27621	10.4015	9.08619	1.33085	1.42361	1.4048	57.4254	67.023	76.1972	4.25118	5.44171	4.39127	105.696	113.695	99.8506	5.16528	5.5024	5.61918
IC-QE	Mannose 6P	1397.03	1628.41	1509.74	17736.9	19637.6	16025	4639.34	4940.98	4871.56	22664.5	27013.4	24553.7	7003.37	6608.83	7035.17	19700.1	23301.7	22267
IC-QE	Mannose 6P (13C+1; 6.5%)	96.6088	111.525	104.078	1246.61	1389.78	1134.84	323.254	343.456	337.69	1616.39	1912.94	1732.97	491.73	464.282	491.162	1380.56	1652.19	1587.51
IC-QE	Mannose 6P (13C+2; 0.2%)	N.D.	N.D.	N.D.	N.D.	N.D.	N.D.	N.D.	N.D.	N.D.	N.D.	N.D.	N.D.	N.D.	N.D.	N.D.	N.D.	N.D.	N.D.
IC-QE	Mannose 6P (13C+3; 0%)	N.D.	N.D.	N.D.	N.D.	N.D.	N.D.	N.D.	N.D.	N.D.	N.D.	N.D.	N.D.	N.D.	N.D.	N.D.	N.D.	N.D.	N.D.
IC-QE	Mannose 6P (13C+4; 0%)	N.D.	N.D.	N.D.	N.D.	N.D.	N.D.	0.417025	0.470002	0.582676	N.D.	N.D.	N.D.	0.907497	0.935017	1.04334	N.D.	N.D.	N.D.
IC-QE	Mannose 6P (13C+5; 0%)	3.3053	3.88056	3.76607	N.D.	N.D.	N.D.	23.5119	24.5379	24.5781	N.D.	N.D.	N.D.	38.4758	36.4206	35.9482	N.D.	N.D.	N.D.
IC-QE	Mannose 6P (13C+6; 0%)	72.3405	82.9178	79.9846	5.01801	5.74926	4.88466	470.433	498.764	497.612	17.0197	20.484	19.5943	783.077	730.639	734.227	19.1253	22.7091	21.3074
IC-QE	myo-Inositol 2P	6.07265	7.85047	6.32202	7.44648	6.7981	6.49442	7.53484	8.99914	9.55369	9.42899	9.2743	8.85691	9.79694	9.36167	8.56794	8.29425	8.56818	8.26426
IC-QE	myo-Inositol 2P (13C+1; 6.5%)	0.330475	0.43871	0.341245	0.414606	0.377114	0.338845	0.396592	0.521129	0.542026	0.481001	0.485582	0.499704	0.487738	0.498552	0.458004	0.45676	0.502403	0.476563
IC-QE	myo-Inositol 2P (13C+2; 0.2%)	N.D.	N.D.	N.D.	N.D.	N.D.	N.D.	N.D.	N.D.	N.D.	N.D.	N.D.	N.D.	N.D.	N.D.	N.D.	N.D.	N.D.	N.D.
IC-QE	myo-Inositol 2P (13C+3; 0%)	N.D.	N.D.	N.D.	N.D.	N.D.	N.D.	N.D.	N.D.	N.D.	N.D.	N.D.	N.D.	N.D.	N.D.	N.D.	N.D.	N.D.	N.D.
IC-QE	myo-Inositol 2P (13C+4; 0%)	N.D.	N.D.	N.D.	N.D.	N.D.	N.D.	N.D.	N.D.	N.D.	N.D.	N.D.	N.D.	N.D.	N.D.	N.D.	N.D.	N.D.	N.D.
IC-QE	myo-Inositol 2P (13C+5; 0%)	N.D.	N.D.	N.D.	N.D.	N.D.	N.D.	N.D.	N.D.	N.D.	N.D.	N.D.	N.D.	N.D.	N.D.	N.D.	N.D.	N.D.	N.D.
IC-QE	myo-Inositol 2P (13C+6; 0%)	N.D.	N.D.	N.D.	N.D.	N.D.	N.D.	N.D.	N.D.	N.D.	N.D.	N.D.	N.D.	N.D.	N.D.	N.D.	N.D.	N.D.	N.D.
IC-QE	myo-Inositol 3P+Galactose 1P	7.11197	8.94284	7.18561	N.D.	N.D.	N.D.	3.12563	2.9248	3.56268	N.D.	N.D.	N.D.	2.66033	3.21812	3.33279	N.D.	N.D.	N.D.
IC-QE	myo-Inositol 3P+Galactose 1P (13C+1; 6.5%)	0.352783	0.377171	0.38223	N.D.	N.D.	N.D.	N.D.	0.11657	0.103871	N.D.	N.D.	N.D.	0.0748656	0.0966951	N.D.	N.D.	N.D.	N.D.
IC-QE	myo-Inositol 3P+Galactose 1P (13C+2; 0.2%)	N.D.	N.D.	N.D.	N.D.	N.D.	N.D.	N.D.	N.D.	N.D.	N.D.	N.D.	N.D.	N.D.	N.D.	N.D.	N.D.	N.D.	N.D.
IC-QE	myo-Inositol 3P+Galactose 1P (13C+3; 0%)	N.D.	N.D.	N.D.	N.D.	N.D.	N.D.	N.D.	N.D.	N.D.	N.D.	N.D.	N.D.	N.D.	N.D.	N.D.	N.D.	N.D.	N.D.
IC-QE	myo-Inositol 3P+Galactose 1P (13C+4; 0%)	N.D.	N.D.	N.D.	N.D.	N.D.	N.D.	N.D.	N.D.	N.D.	N.D.	N.D.	N.D.	N.D.	N.D.	N.D.	N.D.	N.D.	N.D.
IC-QE	myo-Inositol 3P+Galactose 1P (13C+5; 0%)	0.396176	0.542149	0.410372	0.13243	0.149458	0.119952	0.497769	0.583291	0.59624	0.131618	0.0841802	0.106771	0.429629	0.463829	0.382979	0.0374064	0.0453692	0.0510377
IC-QE	myo-Inositol 3P+Galactose 1P (13C+6; 0%)	9.64003	11.7088	9.57728	3.24718	3.49488	2.85344	11.6724	12.8033	12.3728	3.17614	3.37263	3.21334	9.55134	10.1673	9.26911	1.92504	2.00025	1.87641
IC-QE	NADH	39.6216	41.2101	30.8931	11.5578	14.3219	12.7804	26.0083	29.4893	30.8341	14.1993	15.2891	14.163	18.0461	21.6457	19.7438	8.05399	10.1881	9.61245
IC-QE	NADH (13C+1; 22.7%)	8.25371	8.87281	6.63458	2.46423	2.94499	2.72123	5.30817	6.01642	6.50844	2.75294	3.24117	2.7814	3.88265	4.27705	3.90163	1.68106	2.19743	2.14125
IC-QE	NADH (13C+2; 2.5%)	1.21168	1.42645	1.08636	0.395438	0.457864	0.399518	0.884895	1.11956	0.972241	0.437492	0.632196	0.458099	0.670762	0.838938	0.59869	0.31244	0.409466	0.40308
IC-QE	NADH (13C+3; 0.2%)	0.180242	0.207492	0.127048	N.D.	N.D.	N.D.	0.0970397	0.151455	0.105964	0.106852	0.12651	0.0670118	0.090249	0.0808395	0.0568589	0.11468	0.111185	0.147462
IC-QE	NADH (13C+4; 0%)	N.D.	N.D.	0.00969846	N.D.	N.D.	N.D.	0.116657	0.12513	0.107932	N.D.	N.D.	N.D.	0.153256	0.154481	0.171274	0.0360872	0.0578192	0.0585953
IC-QE	NADH (13C+5; 0%)	0.702381	0.807477	0.726286	N.D.	N.D.	N.D.	5.44525	6.80113	6.66935	1.57733	1.76538	1.63685	8.85558	9.69823	8.61814	2.33818	2.92584	2.58514
IC-QE	NADH (13C+6; 0%)	0.0921432	0.0641137	0.0527829	N.D.	N.D.	N.D.	0.829374	1.0184	1.00271	0.22296	0.151913	0.202866	1.36169	1.42768	1.44137	0.383788	0.375978	0.376783
IC-QE	NADH (13C+7; 0%)	N.D.	N.D.	N.D.	N.D.	N.D.	N.D.	0.119161	0.0983234	0.143284	N.D.	N.D.	N.D.	0.214427	0.240628	0.18269	N.D.	N.D.	0.0436991
IC-QE	NADH (13C+8; 0%)	N.D.	N.D.	N.D.	N.D.	N.D.	N.D.	N.D.	N.D.	N.D.	N.D.	N.D.	N.D.	0.0402584	0.0256276	N.D.	N.D.	N.D.	N.D.
IC-QE	NADH (13C+9; 0%)	N.D.	N.D.	N.D.	N.D.	N.D.	N.D.	0.0282327	0.0511879	N.D.	N.D.	N.D.	N.D.	0.21145	0.258951	0.193505	N.D.	N.D.	N.D.
IC-QE	NADH (13C+10; 0%)	N.D.	N.D.	N.D.	N.D.	N.D.	N.D.	1.28154	1.53927	1.54094	N.D.	N.D.	N.D.	3.96928	4.74522	4.20983	N.D.	N.D.	N.D.
IC-QE	NADH (13C+11; 0%)	N.D.	N.D.	N.D.	N.D.	N.D.	N.D.	0.0998648	0.144975	0.138534	N.D.	N.D.	N.D.	0.682325	0.765046	0.655726	N.D.	N.D.	N.D.
IC-QE	NADH (13C+12; 0%)	N.D.	N.D.	N.D.	N.D.	N.D.	N.D.	N.D.	N.D.	N.D.	N.D.	N.D.	N.D.	0.0914133	0.133673	0.0703032	N.D.	N.D.	N.D.
IC-QE	NADH (13C+13; 0%)	N.D.	N.D.	N.D.	N.D.	N.D.	N.D.	N.D.	N.D.	N.D.	N.D.	N.D.	N.D.	N.D.	N.D.	N.D.	N.D.	N.D.	N.D.
IC-QE	NADH (13C+14; 0%)	N.D.	N.D.	N.D.	N.D.	N.D.	N.D.	N.D.	N.D.	N.D.	N.D.	N.D.	N.D.	N.D.	N.D.	N.D.	N.D.	N.D.	N.D.
IC-QE	NADH (13C+15; 0%)	N.D.	N.D.	N.D.	N.D.	N.D.	N.D.	N.D.	N.D.	N.D.	N.D.	N.D.	N.D.	N.D.	N.D.	N.D.	N.D.	N.D.	N.D.
IC-QE	NADH (13C+16; 0%)	N.D.	N.D.	N.D.	N.D.	N.D.	N.D.	N.D.	N.D.	N.D.	N.D.	N.D.	N.D.	N.D.	N.D.	N.D.	N.D.	N.D.	N.D.
IC-QE	NADH (13C+17; 0%)	N.D.	N.D.	N.D.	N.D.	N.D.	N.D.	N.D.	N.D.	N.D.	N.D.	N.D.	N.D.	N.D.	N.D.	N.D.	N.D.	N.D.	N.D.
IC-QE	NADH (13C+18; 0%)	N.D.	N.D.	N.D.	N.D.	N.D.	N.D.	N.D.	N.D.	N.D.	N.D.	N.D.	N.D.	N.D.	N.D.	N.D.	N.D.	N.D.	N.D.
IC-QE	NADH (13C+19; 0%)	N.D.	N.D.	N.D.	N.D.	N.D.	N.D.	N.D.	N.D.	N.D.	N.D.	N.D.	N.D.	N.D.	N.D.	N.D.	N.D.	N.D.	N.D.
IC-QE	NADH (13C+20; 0%)	N.D.	N.D.	N.D.	N.D.	N.D.	N.D.	N.D.	N.D.	N.D.	N.D.	N.D.	N.D.	N.D.	N.D.	N.D.	N.D.	N.D.	N.D.
IC-QE	NADH (13C+21; 0%)	N.D.	N.D.	N.D.	N.D.	N.D.	N.D.	N.D.	N.D.	N.D.	N.D.	N.D.	N.D.	N.D.	N.D.	N.D.	N.D.	N.D.	N.D.
IC-QE	NADP+	42.9275	57.0902	46.9524	30.2972	32.1036	25.647	55.6877	61.3824	77.1826	23.1877	32.505	32.8813	56.9321	33.4451	62.8875	18.7113	21.1584	15.6013
IC-QE	NADP+ (13C+1; 22.7%)	N.D.	N.D.	N.D.	N.D.	N.D.	N.D.	N.D.	N.D.	N.D.	N.D.	N.D.	N.D.	N.D.	N.D.	N.D.	N.D.	N.D.	N.D.
IC-QE	NADP+ (13C+2; 2.5%)	N.D.	N.D.	N.D.	N.D.	N.D.	N.D.	N.D.	N.D.	N.D.	N.D.	N.D.	N.D.	N.D.	N.D.	N.D.	N.D.	N.D.	N.D.
IC-QE	NADP+ (13C+3; 0.2%)	N.D.	N.D.	N.D.	N.D.	N.D.	N.D.	N.D.	N.D.	N.D.	N.D.	N.D.	N.D.	N.D.	N.D.	N.D.	N.D.	N.D.	N.D.
IC-QE	NADP+ (13C+4; 0%)	N.D.	N.D.	N.D.	N.D.	N.D.	N.D.	N.D.	N.D.	N.D.	N.D.	N.D.	N.D.	N.D.	N.D.	N.D.	N.D.	N.D.	N.D.
IC-QE	NADP+ (13C+5; 0%)	N.D.	N.D.	N.D.	N.D.	N.D.	N.D.	N.D.	N.D.	N.D.	N.D.	N.D.	N.D.	N.D.	N.D.	N.D.	N.D.	N.D.	N.D.
IC-QE	NADP+ (13C+6; 0%)	N.D.	N.D.	N.D.	N.D.	N.D.	N.D.	N.D.	N.D.	N.D.	N.D.	N.D.	N.D.	N.D.	N.D.	N.D.	N.D.	N.D.	N.D.
IC-QE	NADP+ (13C+7; 0%)	N.D.	N.D.	N.D.	N.D.	N.D.	N.D.	N.D.	N.D.	N.D.	N.D.	N.D.	N.D.	N.D.	N.D.	N.D.	N.D.	N.D.	N.D.
IC-QE	NADP+ (13C+8; 0%)	N.D.	N.D.	N.D.	N.D.	N.D.	N.D.	N.D.	N.D.	N.D.	N.D.	N.D.	N.D.	N.D.	N.D.	N.D.	N.D.	N.D.	N.D.
IC-QE	NADP+ (13C+9; 0%)	N.D.	N.D.	N.D.	N.D.	N.D.	N.D.	N.D.	N.D.	N.D.	N.D.	N.D.	N.D.	N.D.	N.D.	N.D.	N.D.	N.D.	N.D.
IC-QE	NADP+ (13C+10; 0%)	N.D.	N.D.	N.D.	N.D.	N.D.	N.D.	N.D.	N.D.	N.D.	N.D.	N.D.	N.D.	N.D.	N.D.	N.D.	N.D.	N.D.	N.D.
IC-QE	NADP+ (13C+11; 0%)	N.D.	N.D.	N.D.	N.D.	N.D.	N.D.	N.D.	N.D.	N.D.	N.D.	N.D.	N.D.	N.D.	N.D.	N.D.	N.D.	N.D.	N.D.
IC-QE	NADP+ (13C+12; 0%)	N.D.	N.D.	N.D.	N.D.	N.D.	N.D.	N.D.	N.D.	N.D.	N.D.	N.D.	N.D.	N.D.	N.D.	N.D.	N.D.	N.D.	N.D.
IC-QE	NADP+ (13C+13; 0%)	N.D.	N.D.	N.D.	N.D.	N.D.	N.D.	N.D.	N.D.	N.D.	N.D.	N.D.	N.D.	N.D.	N.D.	N.D.	N.D.	N.D.	N.D.
IC-QE	NADP+ (13C+14; 0%)	N.D.	N.D.	N.D.	N.D.	N.D.	N.D.	N.D.	N.D.	N.D.	N.D.	N.D.	N.D.	N.D.	N.D.	N.D.	N.D.	N.D.	N.D.
IC-QE	NADP+ (13C+15; 0%)	N.D.	N.D.	N.D.	N.D.	N.D.	N.D.	N.D.	N.D.	N.D.	N.D.	N.D.	N.D.	N.D.	N.D.	N.D.	N.D.	N.D.	N.D.
IC-QE	NADP+ (13C+16; 0%)	N.D.	N.D.	N.D.	N.D.	N.D.	N.D.	N.D.	N.D.	N.D.	N.D.	N.D.	N.D.	N.D.	N.D.	N.D.	N.D.	N.D.	N.D.
IC-QE	NADP+ (13C+17; 0%)	N.D.	N.D.	N.D.	N.D.	N.D.	N.D.	N.D.	N.D.	N.D.	N.D.	N.D.	N.D.	N.D.	N.D.	N.D.	N.D.	N.D.	N.D.
IC-QE	NADP+ (13C+18; 0%)	N.D.	N.D.	N.D.	N.D.	N.D.	N.D.	N.D.	N.D.	N.D.	N.D.	N.D.	N.D.	N.D.	N.D.	N.D.	N.D.	N.D.	N.D.
IC-QE	NADP+ (13C+19; 0%)	N.D.	N.D.	N.D.	N.D.	N.D.	N.D.	N.D.	N.D.	N.D.	N.D.	N.D.	N.D.	N.D.	N.D.	N.D.	N.D.	N.D.	N.D.
IC-QE	NADP+ (13C+20; 0%)	N.D.	N.D.	N.D.	N.D.	N.D.	N.D.	N.D.	N.D.	N.D.	N.D.	N.D.	N.D.	N.D.	N.D.	N.D.	N.D.	N.D.	N.D.
IC-QE	NADP+ (13C+21; 0%)	N.D.	N.D.	N.D.	N.D.	N.D.	N.D.	N.D.	N.D.	N.D.	N.D.	N.D.	N.D.	N.D.	N.D.	N.D.	N.D.	N.D.	N.D.
IC-QE	NADPH	59.7836	66.422	58.0599	38.0244	39.5345	32.4838	68.0857	68.296	79.0007	37.0166	42.8808	38.8523	60.9561	53.3618	47.7459	29.6963	28.8505	28.3862
IC-QE	NADPH (13C+1; 22.7%)	12.016	14.5631	13.1893	7.46602	8.6236	6.59933	15.1504	14.799	17.3953	7.78602	9.39199	8.32322	13.3399	11.1154	10.7245	6.27487	5.78373	5.59238
IC-QE	NADPH (13C+2; 2.5%)	2.68776	3.00033	2.7352	1.76817	1.73059	1.46638	3.47648	3.1542	3.67099	1.7369	1.97101	1.82391	3.00359	2.59833	2.22498	1.58827	1.40909	1.39374
IC-QE	NADPH (13C+3; 0.2%)	0.476265	0.466094	0.411055	0.266109	0.274004	0.180438	0.481456	0.476169	0.634053	0.337388	0.463727	0.371623	0.490956	0.43257	0.421693	0.412354	0.440685	0.369749
IC-QE	NADPH (13C+4; 0%)	0.0184647	0.0530715	0.0410028	0.0254598	0.011435	0.0134426	0.358822	0.419663	0.490923	0.0983858	0.120183	0.104425	0.907543	0.793678	0.629245	0.274813	0.265379	0.251866
IC-QE	NADPH (13C+5; 0%)	0.362388	0.523512	0.484518	0.0122947	0.0122279	0.0133815	11.8616	11.7424	13.8182	2.90081	3.50007	3.33836	25.3125	21.3799	19.7594	7.31638	6.83685	6.27121
IC-QE	NADPH (13C+6; 0%)	0.0373687	0.0611119	0.0427157	N.D.	N.D.	N.D.	1.84497	1.83332	2.21557	0.499616	0.559342	0.608626	3.99594	3.58844	3.21306	1.17258	0.999632	0.987358
IC-QE	NADPH (13C+7; 0%)	N.D.	N.D.	N.D.	N.D.	N.D.	N.D.	0.469907	0.387656	0.517024	0.086597	0.0952602	0.115654	1.00575	0.82473	0.815709	0.225476	0.233525	0.200799
IC-QE	NADPH (13C+8; 0%)	N.D.	N.D.	N.D.	N.D.	N.D.	N.D.	0.0465295	0.0467504	0.0502393	N.D.	N.D.	N.D.	0.248257	0.122106	0.160718	0.0166827	0.0325225	0.0126111
IC-QE	NADPH (13C+9; 0%)	N.D.	N.D.	N.D.	N.D.	N.D.	N.D.	0.116521	0.106515	0.159599	N.D.	N.D.	N.D.	0.755918	0.710984	0.555434	N.D.	N.D.	N.D.
IC-QE	NADPH (13C+10; 0%)	N.D.	N.D.	N.D.	N.D.	N.D.	N.D.	2.32935	2.30518	2.63361	N.D.	N.D.	N.D.	11.1944	9.49514	8.43781	0.178866	0.18041	0.172511
IC-QE	NADPH (13C+11; 0%)	N.D.	N.D.	N.D.	N.D.	N.D.	N.D.	0.341631	0.397375	0.400001	N.D.	N.D.	N.D.	1.97814	1.6595	1.50378	N.D.	N.D.	N.D.
IC-QE	NADPH (13C+12; 0%)	N.D.	N.D.	N.D.	N.D.	N.D.	N.D.	0.0720918	0.0353606	0.0479378	N.D.	N.D.	N.D.	0.499001	0.408381	0.430105	N.D.	N.D.	N.D.
IC-QE	NADPH (13C+13; 0%)	N.D.	N.D.	N.D.	N.D.	N.D.	N.D.	N.D.	N.D.	N.D.	N.D.	N.D.	N.D.	0.0498042	0.0336573	0.0214904	N.D.	N.D.	N.D.
IC-QE	NADPH (13C+14; 0%)	N.D.	N.D.	N.D.	N.D.	N.D.	N.D.	N.D.	N.D.	N.D.	N.D.	N.D.	N.D.	N.D.	N.D.	N.D.	N.D.	N.D.	N.D.
IC-QE	NADPH (13C+15; 0%)	N.D.	N.D.	N.D.	N.D.	N.D.	N.D.	N.D.	N.D.	N.D.	N.D.	N.D.	N.D.	N.D.	N.D.	N.D.	N.D.	N.D.	N.D.
IC-QE	NADPH (13C+16; 0%)	N.D.	N.D.	N.D.	N.D.	N.D.	N.D.	N.D.	N.D.	N.D.	N.D.	N.D.	N.D.	N.D.	N.D.	N.D.	N.D.	N.D.	N.D.
IC-QE	NADPH (13C+17; 0%)	N.D.	N.D.	N.D.	N.D.	N.D.	N.D.	N.D.	N.D.	N.D.	N.D.	N.D.	N.D.	N.D.	N.D.	N.D.	N.D.	N.D.	N.D.
IC-QE	NADPH (13C+18; 0%)	N.D.	N.D.	N.D.	N.D.	N.D.	N.D.	N.D.	N.D.	N.D.	N.D.	N.D.	N.D.	N.D.	N.D.	N.D.	N.D.	N.D.	N.D.
IC-QE	NADPH (13C+19; 0%)	N.D.	N.D.	N.D.	N.D.	N.D.	N.D.	N.D.	N.D.	N.D.	N.D.	N.D.	N.D.	N.D.	N.D.	N.D.	N.D.	N.D.	N.D.
IC-QE	NADPH (13C+20; 0%)	N.D.	N.D.	N.D.	N.D.	N.D.	N.D.	N.D.	N.D.	N.D.	N.D.	N.D.	N.D.	N.D.	N.D.	N.D.	N.D.	N.D.	N.D.
IC-QE	NADPH (13C+21; 0%)	N.D.	N.D.	N.D.	N.D.	N.D.	N.D.	N.D.	N.D.	N.D.	N.D.	N.D.	N.D.	N.D.	N.D.	N.D.	N.D.	N.D.	N.D.
IC-QE	Orotate	0.306269	0.468577	0.445548	N.D.	N.D.	N.D.	N.D.	0.186763	0.359209	N.D.	N.D.	N.D.	0.10702	0.312895	0.235427	N.D.	N.D.	N.D.
IC-QE	Orotate (13C+1; 5.4%)	N.D.	N.D.	N.D.	N.D.	N.D.	N.D.	N.D.	N.D.	N.D.	N.D.	N.D.	N.D.	N.D.	N.D.	N.D.	N.D.	N.D.	N.D.
IC-QE	Orotate (13C+2; 0.1%)	N.D.	N.D.	N.D.	N.D.	N.D.	N.D.	0.00434513	0.0102668	0.0287665	N.D.	N.D.	N.D.	0.0307839	0.0472945	0.0223339	N.D.	N.D.	N.D.
IC-QE	Orotate (13C+3; 0%)	N.D.	N.D.	N.D.	N.D.	N.D.	N.D.	N.D.	N.D.	N.D.	N.D.	N.D.	N.D.	N.D.	N.D.	N.D.	N.D.	N.D.	N.D.
IC-QE	Orotate (13C+4; 0%)	N.D.	N.D.	N.D.	N.D.	N.D.	N.D.	N.D.	N.D.	N.D.	N.D.	N.D.	N.D.	N.D.	N.D.	N.D.	N.D.	N.D.	N.D.
IC-QE	Orotate (13C+5; 0%)	N.D.	N.D.	N.D.	N.D.	N.D.	N.D.	N.D.	N.D.	N.D.	N.D.	N.D.	N.D.	N.D.	N.D.	N.D.	N.D.	N.D.	N.D.
IC-QE	Orotidine 5'-monophosphate	N.D.	N.D.	N.D.	N.D.	N.D.	N.D.	N.D.	N.D.	N.D.	N.D.	N.D.	N.D.	N.D.	N.D.	N.D.	N.D.	N.D.	N.D.
IC-QE	Orotidine 5'-monophosphate (13C+1; 10.8%)	N.D.	N.D.	N.D.	N.D.	N.D.	N.D.	N.D.	N.D.	N.D.	N.D.	N.D.	N.D.	N.D.	N.D.	N.D.	N.D.	N.D.	N.D.
IC-QE	Orotidine 5'-monophosphate (13C+2; 0.5%)	N.D.	N.D.	N.D.	N.D.	N.D.	N.D.	N.D.	N.D.	N.D.	N.D.	N.D.	N.D.	N.D.	N.D.	N.D.	N.D.	N.D.	N.D.
IC-QE	Orotidine 5'-monophosphate (13C+3; 0%)	N.D.	N.D.	N.D.	N.D.	N.D.	N.D.	N.D.	N.D.	N.D.	N.D.	N.D.	N.D.	N.D.	N.D.	N.D.	N.D.	N.D.	N.D.
IC-QE	Orotidine 5'-monophosphate (13C+4; 0%)	N.D.	N.D.	N.D.	N.D.	N.D.	N.D.	N.D.	N.D.	N.D.	N.D.	N.D.	N.D.	N.D.	N.D.	N.D.	N.D.	N.D.	N.D.
IC-QE	Orotidine 5'-monophosphate (13C+5; 0%)	0.0694773	0.143043	0.155716	N.D.	N.D.	N.D.	0.155123	0.23292	N.D.	N.D.	N.D.	N.D.	0.0850646	0.117905	0.2141	N.D.	N.D.	N.D.
IC-QE	Orotidine 5'-monophosphate (13C+6; 0%)	N.D.	N.D.	N.D.	N.D.	N.D.	N.D.	N.D.	N.D.	N.D.	N.D.	N.D.	N.D.	N.D.	N.D.	N.D.	N.D.	N.D.	N.D.
IC-QE	Orotidine 5'-monophosphate (13C+7; 0%)	N.D.	N.D.	N.D.	N.D.	N.D.	N.D.	N.D.	N.D.	N.D.	N.D.	N.D.	N.D.	N.D.	N.D.	N.D.	N.D.	N.D.	N.D.
IC-QE	Orotidine 5'-monophosphate (13C+8; 0%)	N.D.	N.D.	N.D.	N.D.	N.D.	N.D.	N.D.	N.D.	N.D.	N.D.	N.D.	N.D.	N.D.	N.D.	N.D.	N.D.	N.D.	N.D.
IC-QE	Orotidine 5'-monophosphate (13C+9; 0%)	N.D.	N.D.	N.D.	N.D.	N.D.	N.D.	N.D.	N.D.	N.D.	N.D.	N.D.	N.D.	N.D.	N.D.	N.D.	N.D.	N.D.	N.D.
IC-QE	Orotidine 5'-monophosphate (13C+10; 0%)	N.D.	N.D.	N.D.	N.D.	N.D.	N.D.	N.D.	N.D.	N.D.	N.D.	N.D.	N.D.	N.D.	N.D.	N.D.	N.D.	N.D.	N.D.
IC-QE	PEP	1.03824	0.859634	0.83806	1.49422	1.98653	1.67084	0.638954	0.924527	0.802845	1.85403	2.44063	2.05	0.773143	1.03367	0.768406	1.48008	1.53732	2.00957
IC-QE	PEP (13C+1; 3.2%)	0.0476751	N.D.	N.D.	0.0160305	0.0510124	0.0272854	N.D.	N.D.	N.D.	0.13493	0.17113	0.127905	0.013909	0.0590358	0.0297571	0.0727602	0.110261	0.127918
IC-QE	PEP (13C+2; 0%)	N.D.	N.D.	N.D.	N.D.	N.D.	N.D.	N.D.	N.D.	N.D.	N.D.	N.D.	N.D.	N.D.	N.D.	N.D.	N.D.	N.D.	N.D.
IC-QE	PEP (13C+3; 0%)	10.294	2.68126	1.34471	0.511232	0.550669	0.603414	1.21287	0.958123	0.853751	0.629321	0.629214	0.496502	0.966448	0.79769	0.716075	0.504969	0.492397	0.43237
IC-QE	PRPP	0.0723936	0.115781	0.0848198	5.35183	5.82716	4.03598	0.134053	0.131813	0.109338	1.31292	1.5105	1.4538	0.198441	0.182816	0.125049	1.8247	1.8082	1.85028
IC-QE	PRPP (13C+1; 5.4%)	N.D.	N.D.	N.D.	0.278731	0.310983	0.207105	N.D.	N.D.	N.D.	0.051304	0.0379218	0.0467108	N.D.	N.D.	N.D.	0.0799103	0.085031	0.0697798
IC-QE	PRPP (13C+2; 0.1%)	0.112582	0.0950997	0.0966952	0.21076	0.242735	0.201156	0.108643	0.0928696	0.0513175	0.218533	0.261094	0.262117	0.115104	0.0982132	0.0469591	0.339689	0.332479	0.352383
IC-QE	PRPP (13C+3; 0%)	0.0848089	0.0942852	0.0699309	0.531105	0.566888	0.388195	0.107524	0.0568633	0.0581809	0.354054	0.415912	0.422497	0.119715	0.0980055	0.0610165	0.550973	0.500489	0.553407
IC-QE	PRPP (13C+4; 0%)	0.166191	0.176671	0.18859	0.396264	0.380369	0.252058	0.577014	0.515791	0.385472	0.419749	0.508177	0.419848	0.849673	0.737761	0.474591	0.561488	0.537268	0.581207
IC-QE	PRPP (13C+5; 0%)	5.10033	5.15252	4.94725	9.91705	10.1813	7.95947	16.6721	14.9823	13.0003	11.3527	13.9964	12.5455	24.7565	21.7557	12.5182	15.6692	14.9579	16.3456
IC-QE	Pyruvate	5.75217	13.4129	12.3434	22.1168	26.0244	22.2489	14.2774	20.7549	21.0964	18.327	21.021	18.5443	13.607	19.0457	13.0136	14.5111	13.4953	16.2813
IC-QE	Pyruvate (13C+1; 3.2%)	0.172118	0.533111	0.906489	0.821196	1.07002	0.905339	0.994026	1.57747	1.56222	1.21535	1.38574	1.09342	1.50386	1.77007	1.67641	1.351	1.20397	1.38954
IC-QE	Pyruvate (13C+2; 0%)	0.719246	1.46731	1.99993	0.415026	0.501148	0.497857	2.43529	2.48978	2.6167	0.83845	0.76112	0.672592	2.2622	2.35177	1.9675	0.651958	0.728045	0.752375
IC-QE	Pyruvate (13C+3; 0%)	42.8967	76.9673	95.7783	20.3725	24.3795	24.1324	98.0484	77.8094	76.3321	19.7249	19.4987	16.8567	54.7063	42.0433	36.3809	13.129	10.9905	12.8566
IC-QE	Ru5P + R5P	0.722745	1.05575	0.887002	4.21459	4.35629	3.82371	0.991415	0.878904	1.31782	3.59213	3.41903	3.17664	0.733392	0.685371	0.697603	2.72762	2.96377	2.72841
IC-QE	Ru5P + R5P (13C+1; 5.4%)	N.D.	N.D.	N.D.	N.D.	N.D.	N.D.	N.D.	N.D.	N.D.	N.D.	N.D.	N.D.	N.D.	N.D.	N.D.	N.D.	N.D.	N.D.
IC-QE	Ru5P + R5P (13C+2; 0.1%)	0.0756066	N.D.	N.D.	0.23883	0.0894279	0.117795	N.D.	N.D.	N.D.	N.D.	N.D.	N.D.	N.D.	N.D.	N.D.	N.D.	N.D.	N.D.
IC-QE	Ru5P + R5P (13C+3; 0%)	N.D.	N.D.	N.D.	N.D.	N.D.	N.D.	N.D.	N.D.	N.D.	N.D.	N.D.	N.D.	N.D.	N.D.	N.D.	N.D.	N.D.	N.D.
IC-QE	Ru5P + R5P (13C+4; 0%)	N.D.	N.D.	N.D.	N.D.	N.D.	N.D.	N.D.	N.D.	N.D.	N.D.	N.D.	N.D.	N.D.	N.D.	N.D.	N.D.	N.D.	N.D.
IC-QE	Ru5P + R5P (13C+5; 0%)	8.49323	4.97675	3.38367	3.00151	2.29198	2.28203	6.17829	6.01031	5.23773	2.28945	2.07577	2.88465	3.62282	4.09921	3.54649	1.94738	2.92778	2.87044
IC-QE	S7P	0.0397474	0.0766949	0.0863055	0.211114	0.31904	0.264878	0.00394716	0.0689975	0.127161	0.24919	0.257965	0.312521	0.0195474	0.0484393	0.0204882	0.212836	0.288094	0.202231
IC-QE	S7P (13C+1; 7.6%)	N.D.	N.D.	N.D.	N.D.	N.D.	N.D.	N.D.	N.D.	N.D.	N.D.	N.D.	N.D.	N.D.	N.D.	N.D.	N.D.	N.D.	N.D.
IC-QE	S7P (13C+2; 0.2%)	0.105097	0.216397	0.310703	0.508818	0.472699	0.433058	0.285508	0.32266	0.429924	0.252779	0.291701	0.309353	0.157248	0.305882	0.234212	0.177222	0.265145	0.274485
IC-QE	S7P (13C+3; 0%)	N.D.	N.D.	N.D.	N.D.	N.D.	N.D.	N.D.	0.022106	N.D.	N.D.	N.D.	N.D.	N.D.	N.D.	N.D.	N.D.	N.D.	N.D.
IC-QE	S7P (13C+4; 0%)	0.158819	0.104884	0.0945294	0.174173	0.184256	0.154786	0.141018	0.153957	0.0980583	0.0339393	0.0124063	0.024325	0.083382	0.0856793	0.0918107	N.D.	0.0278346	N.D.
IC-QE	S7P (13C+5; 0%)	0.348324	0.337266	0.348993	0.484425	0.440613	0.422443	0.233513	0.417041	0.362163	0.186316	0.223898	0.319648	0.227986	0.304216	0.242664	0.17637	0.230772	0.28323
IC-QE	S7P (13C+6; 0%)	0.276144	0.201767	0.144529	0.0721484	0.0559308	0.0363133	0.15326	0.169349	0.168199	0.014501	0.021011	0.0264128	0.0912209	0.0821193	0.0752356	0.0178625	0.0150358	0.0189662
IC-QE	S7P (13C+7; 0%)	5.4498	3.53126	2.7424	2.13283	2.12105	1.88283	4.20951	4.27759	3.23636	1.34059	1.32926	1.40462	3.57397	2.89747	2.3462	0.862048	1.15538	1.19798
IC-QE	Succinate	20.298	37.4236	27.069	34.197	38.0345	33.3345	55.3592	69.8199	72.7314	40.8787	39.1697	35.9291	70.8729	79.7948	71.169	31.8698	36.9821	35.6365
IC-QE	Succinate (13C+1; 4.3%)	0.851592	1.60839	1.16198	1.49508	1.59013	1.4333	2.58966	3.24207	3.66857	2.14522	1.99838	1.88557	3.7316	4.27487	3.7877	1.78575	2.07913	2.02855
IC-QE	Succinate (13C+2; 0.1%)	0.211606	0.601533	0.327752	0.611795	0.640261	0.604009	7.0114	9.10007	11.3006	1.60979	1.52462	1.53991	14.3994	16.4012	14.4497	1.60954	1.84699	1.80223
IC-QE	Succinate (13C+3; 0%)	0.00357734	0.00395739	N.D.	0.00765698	0.00763571	0.00443319	1.09957	1.45707	1.93182	0.139182	0.108496	0.127497	4.32501	5.04673	4.30068	0.157249	0.196144	0.178792
IC-QE	Succinate (13C+4; 0%)	N.D.	N.D.	N.D.	N.D.	N.D.	N.D.	0.300095	0.350625	0.572842	N.D.	N.D.	N.D.	1.4061	1.6236	1.34423	N.D.	N.D.	N.D.
IC-QE	UDP	67.3504	123.464	123.997	214.304	225.87	209.387	118.732	92.1966	120.565	213.068	259.614	236.612	62.7796	68.7921	54.3053	240.528	247.573	253.78
IC-QE	UDP (13C+1; 9.7%)	5.85529	10.7322	11.2795	19.3954	19.8801	18.3765	10.4913	7.99344	10.8498	18.4927	23.8003	21.884	5.4696	5.89985	4.85645	22.1424	22.6688	23.7189
IC-QE	UDP (13C+2; 0.4%)	0.544145	0.902905	1.54303	N.D.	N.D.	N.D.	0.511572	0.91219	0.723244	1.62616	N.D.	N.D.	1.03638	1.13497	0.905472	2.31478	3.04668	4.01975
IC-QE	UDP (13C+3; 0%)	0.185143	0.436601	0.420723	0.408799	0.282833	0.339871	0.629918	0.38088	0.570207	0.869419	1.07436	1.08644	0.613313	0.588807	0.603967	1.97717	1.98093	2.1473
IC-QE	UDP (13C+4; 0%)	0.706679	1.30024	1.3541	0.0467427	0.0736645	0.0973455	3.72556	2.79385	3.47211	0.78273	1.10075	1.04685	4.22353	4.67544	3.87099	1.95695	2.27667	2.22802
IC-QE	UDP (13C+5; 0%)	20.7131	39.6104	41.8354	3.53211	3.82164	3.73223	111.794	88.7771	105.511	25.4053	32.6788	29.3756	128.308	138.455	113.349	54.8949	61.7628	62.219
IC-QE	UDP (13C+6; 0%)	0.843751	1.53423	1.6995	0.136348	0.0819151	0.103956	8.81065	6.91726	8.82144	1.6814	2.11809	1.99864	16.9908	18.9798	15.792	4.35343	4.89349	4.85399
IC-QE	UDP (13C+7; 0%)	0.119123	0.0953911	0.364992	N.D.	N.D.	N.D.	5.75795	4.58843	6.23615	0.636113	0.665921	0.691494	16.2156	17.7716	14.5732	1.79571	1.9471	2.01833
IC-QE	UDP (13C+8; 0%)	N.D.	N.D.	N.D.	N.D.	N.D.	N.D.	1.47708	1.15619	1.64495	N.D.	N.D.	N.D.	4.10233	4.76645	3.83723	0.0434891	0.062873	0.0598577
IC-QE	UDP (13C+9; 0%)	N.D.	N.D.	N.D.	N.D.	N.D.	N.D.	N.D.	N.D.	N.D.	N.D.	N.D.	N.D.	0.105401	0.0707014	0.141241	N.D.	N.D.	N.D.
IC-QE	UMP	148.984	161.373	155.015	111.698	123.236	116.609	126.921	132.689	149.959	92.6849	92.9195	84.4719	71.4336	75.2824	64.6773	74.7685	70.1585	76.0113
IC-QE	UMP (13C+1; 9.7%)	14.7492	16.1124	15.4767	11.0633	12.0263	11.4139	12.6042	12.7557	14.6703	9.08979	8.94518	8.1682	7.00257	7.27055	6.30407	7.40478	6.87665	7.47282
IC-QE	UMP (13C+2; 0.4%)	N.D.	N.D.	N.D.	N.D.	N.D.	N.D.	N.D.	N.D.	N.D.	N.D.	N.D.	N.D.	N.D.	N.D.	0.164961	0.600176	0.332269	0.573063
IC-QE	UMP (13C+3; 0%)	0.248991	0.252691	0.270093	0.0270392	0.0292136	0.0428841	0.588768	0.561365	0.625704	0.852918	0.817083	0.79401	0.674949	0.699497	0.623914	1.15426	1.00998	1.19029
IC-QE	UMP (13C+4; 0%)	0.893495	1.00555	1.05664	0.0390714	0.0372009	0.0530969	3.63009	3.96112	4.13209	0.983303	0.995454	0.857952	4.78179	4.97068	4.36734	1.36312	1.23667	1.37927
IC-QE	UMP (13C+5; 0%)	24.0318	27.7666	28.9548	1.43829	1.45185	1.74	97.8132	104.295	106.814	26.7685	25.8254	23.3728	122.719	126.635	111.87	34.2903	32.2825	35.7861
IC-QE	UMP (13C+6; 0%)	1.02686	1.06607	1.24738	0.05124	0.0496813	0.0567174	7.93903	8.5201	9.3853	1.87292	1.78773	1.62833	17.6301	18.2679	16.0237	2.98511	2.79298	3.06021
IC-QE	UMP (13C+7; 0%)	N.D.	N.D.	N.D.	N.D.	N.D.	N.D.	4.39199	4.55547	5.77121	0.4673	0.467662	0.40947	16.2555	16.8469	14.692	1.02855	0.924973	0.997822
IC-QE	UMP (13C+8; 0%)	N.D.	N.D.	N.D.	N.D.	N.D.	N.D.	1.15637	1.19986	1.54921	N.D.	N.D.	N.D.	4.2095	4.49648	3.89164	0.0274592	0.0353724	0.0366625
IC-QE	UMP (13C+9; 0%)	N.D.	N.D.	N.D.	N.D.	N.D.	N.D.	N.D.	N.D.	N.D.	N.D.	N.D.	N.D.	N.D.	N.D.	N.D.	N.D.	N.D.	N.D.
IC-QE	Urate	0.169521	N.D.	0.211924	N.D.	N.D.	N.D.	N.D.	N.D.	N.D.	N.D.	N.D.	N.D.	N.D.	0.388664	N.D.	N.D.	N.D.	N.D.
IC-QE	Urate (13C+1; 5.4%)	N.D.	N.D.	N.D.	N.D.	N.D.	N.D.	N.D.	N.D.	N.D.	N.D.	N.D.	N.D.	N.D.	N.D.	N.D.	N.D.	N.D.	N.D.
IC-QE	Urate (13C+2; 0.1%)	N.D.	N.D.	N.D.	N.D.	N.D.	N.D.	N.D.	N.D.	N.D.	N.D.	N.D.	N.D.	N.D.	N.D.	N.D.	N.D.	N.D.	N.D.
IC-QE	Urate (13C+3; 0%)	N.D.	N.D.	N.D.	N.D.	N.D.	N.D.	N.D.	N.D.	N.D.	N.D.	N.D.	N.D.	N.D.	N.D.	N.D.	N.D.	N.D.	N.D.
IC-QE	Urate (13C+4; 0%)	N.D.	N.D.	N.D.	N.D.	N.D.	N.D.	N.D.	N.D.	N.D.	N.D.	N.D.	N.D.	N.D.	N.D.	N.D.	N.D.	N.D.	N.D.
IC-QE	Urate (13C+5; 0%)	N.D.	N.D.	N.D.	N.D.	N.D.	N.D.	N.D.	N.D.	N.D.	N.D.	N.D.	N.D.	N.D.	N.D.	N.D.	N.D.	N.D.	N.D.
IC-QE	UTP	341.759	435.515	351.408	291.998	311.109	252.864	287.683	283.261	292.726	146.663	181.164	156.488	187.038	172.814	136.331	127.319	131.81	160.499
IC-QE	UTP (13C+1; 9.7%)	34.61	45.2172	36.406	30.7705	32.4261	26.6757	30.2198	29.8738	30.2326	15.7281	19.4995	16.7306	19.9055	18.1234	14.4427	13.7237	14.0037	17.2544
IC-QE	UTP (13C+2; 0.4%)	11.2878	13.5835	11.9405	8.36657	8.64385	N.D.	8.63589	8.31605	9.10586	5.14324	6.41342	5.1455	5.848	5.5367	4.14416	4.65627	5.16118	5.83239
IC-QE	UTP (13C+3; 0%)	1.80702	2.20583	1.71112	1.57572	1.69257	1.44918	1.89303	1.82598	1.81518	2.92954	3.50903	2.91669	2.33754	2.10805	1.72825	3.37076	3.46102	4.079
IC-QE	UTP (13C+4; 0%)	4.60919	6.06678	4.87034	0.947198	0.971722	0.781994	10.1412	10.3414	9.70751	3.53242	4.25207	3.28901	13.9782	13.2657	10.5418	3.71558	3.76707	4.54493
IC-QE	UTP (13C+5; 0%)	116.241	149.154	123.784	20.8681	22.0207	20.6474	253.164	258.886	239.196	78.4382	97.6158	78.1967	349.649	328.834	263.98	85.8544	90.3548	107.624
IC-QE	UTP (13C+6; 0%)	5.88202	6.78512	6.46211	1.09037	1.16884	1.13039	25.1576	25.2338	25.2773	6.84047	8.31446	6.80338	54.5764	52.0839	41.3963	8.63843	9.24896	10.576
IC-QE	UTP (13C+7; 0%)	N.D.	N.D.	N.D.	N.D.	N.D.	N.D.	14.691	19.2507	18.7218	1.36291	1.3519	1.37133	58.5725	51.4017	42.9304	3.21367	3.46185	3.40622
IC-QE	UTP (13C+8; 0%)	0.210897	0.281952	0.160323	N.D.	N.D.	N.D.	4.26097	4.51097	4.86735	0.154777	0.159428	0.109316	15.4352	14.5838	11.15	0.246373	0.251446	0.362927
IC-QE	UTP (13C+9; 0%)	N.D.	N.D.	N.D.	N.D.	N.D.	N.D.	N.D.	N.D.	N.D.	N.D.	N.D.	N.D.	N.D.	N.D.	N.D.	N.D.	N.D.	N.D.
IC-QE	XMP	N.D.	N.D.	N.D.	0.0961844	0.0864385	0.0697239	N.D.	N.D.	N.D.	0.0376393	N.D.	0.0602927	N.D.	N.D.	N.D.	N.D.	0.0300524	N.D.
IC-QE	XMP (13C+1; 10.8%)	N.D.	N.D.	N.D.	N.D.	N.D.	N.D.	N.D.	N.D.	N.D.	N.D.	N.D.	N.D.	N.D.	N.D.	N.D.	N.D.	N.D.	N.D.
IC-QE	XMP (13C+2; 0.5%)	N.D.	N.D.	N.D.	N.D.	N.D.	N.D.	N.D.	N.D.	N.D.	N.D.	N.D.	N.D.	N.D.	N.D.	N.D.	N.D.	N.D.	N.D.
IC-QE	XMP (13C+3; 0%)	N.D.	N.D.	N.D.	N.D.	N.D.	N.D.	N.D.	N.D.	N.D.	N.D.	N.D.	N.D.	N.D.	N.D.	N.D.	N.D.	N.D.	N.D.
IC-QE	XMP (13C+4; 0%)	N.D.	N.D.	N.D.	N.D.	N.D.	N.D.	N.D.	N.D.	N.D.	N.D.	N.D.	N.D.	N.D.	N.D.	N.D.	N.D.	N.D.	N.D.
IC-QE	XMP (13C+5; 0%)	0.47676	0.533091	0.526153	N.D.	N.D.	N.D.	0.624663	0.764703	0.790514	N.D.	N.D.	N.D.	0.762937	0.915125	0.799781	N.D.	0.0421021	N.D.
IC-QE	XMP (13C+6; 0%)	N.D.	N.D.	0.0187736	N.D.	N.D.	N.D.	N.D.	N.D.	N.D.	N.D.	N.D.	N.D.	0.0526671	0.0240684	0.0509105	N.D.	N.D.	N.D.
IC-QE	XMP (13C+7; 0%)	N.D.	N.D.	N.D.	N.D.	N.D.	N.D.	N.D.	N.D.	N.D.	N.D.	N.D.	N.D.	N.D.	N.D.	N.D.	N.D.	N.D.	N.D.
IC-QE	XMP (13C+8; 0%)	N.D.	N.D.	N.D.	N.D.	N.D.	N.D.	N.D.	N.D.	N.D.	N.D.	N.D.	N.D.	N.D.	N.D.	N.D.	N.D.	N.D.	N.D.
IC-QE	XMP (13C+9; 0%)	N.D.	N.D.	N.D.	N.D.	N.D.	N.D.	N.D.	N.D.	N.D.	N.D.	N.D.	N.D.	N.D.	N.D.	N.D.	N.D.	N.D.	N.D.
IC-QE	XMP (13C+10; 0%)	N.D.	N.D.	N.D.	N.D.	N.D.	N.D.	N.D.	N.D.	N.D.	N.D.	N.D.	N.D.	N.D.	N.D.	N.D.	N.D.	N.D.	N.D.
LC-QE	2'-Deoxycytidine	0.49723	0.570013	0.51159	0.186356	0.257735	0.220297	0.481258	0.566737	0.497524	0.242012	0.258629	0.260537	0.41933	0.427884	0.412806	0.196209	0.207104	0.2827
LC-QE	2'-Deoxycytidine (13C+1; 9.7%)	0.0331291	0.0362855	0.0306376	N.D.	N.D.	N.D.	0.0198006	0.0331799	0.0201258	N.D.	N.D.	N.D.	0.0152277	0.0131949	N.D.	N.D.	N.D.	N.D.
LC-QE	2'-Deoxycytidine (13C+2; 0.4%)	N.D.	N.D.	N.D.	N.D.	N.D.	N.D.	N.D.	N.D.	N.D.	N.D.	N.D.	N.D.	N.D.	N.D.	N.D.	N.D.	N.D.	N.D.
LC-QE	2'-Deoxycytidine (13C+3; 0%)	N.D.	N.D.	N.D.	N.D.	N.D.	N.D.	N.D.	N.D.	N.D.	N.D.	N.D.	N.D.	N.D.	N.D.	N.D.	N.D.	N.D.	N.D.
LC-QE	2'-Deoxycytidine (13C+4; 0%)	N.D.	N.D.	N.D.	N.D.	N.D.	N.D.	N.D.	N.D.	N.D.	N.D.	N.D.	N.D.	N.D.	N.D.	N.D.	N.D.	N.D.	N.D.
LC-QE	2'-Deoxycytidine (13C+5; 0%)	0.0110658	0.0123202	N.D.	N.D.	N.D.	N.D.	0.126717	0.140462	0.115378	N.D.	N.D.	0.000594283	0.192393	0.230289	0.197113	N.D.	N.D.	N.D.
LC-QE	2'-Deoxycytidine (13C+6; 0%)	N.D.	N.D.	N.D.	N.D.	N.D.	N.D.	N.D.	N.D.	N.D.	N.D.	N.D.	N.D.	N.D.	N.D.	N.D.	N.D.	N.D.	N.D.
LC-QE	2'-Deoxycytidine (13C+7; 0%)	N.D.	N.D.	N.D.	N.D.	N.D.	N.D.	N.D.	N.D.	N.D.	N.D.	N.D.	N.D.	N.D.	N.D.	N.D.	N.D.	N.D.	N.D.
LC-QE	2'-Deoxycytidine (13C+8; 0%)	N.D.	N.D.	N.D.	N.D.	N.D.	N.D.	N.D.	N.D.	N.D.	N.D.	N.D.	N.D.	N.D.	N.D.	N.D.	N.D.	N.D.	N.D.
LC-QE	2'-Deoxycytidine (13C+9; 0%)	N.D.	N.D.	N.D.	N.D.	N.D.	N.D.	N.D.	N.D.	N.D.	N.D.	N.D.	N.D.	N.D.	N.D.	N.D.	N.D.	N.D.	N.D.
LC-QE	3-Aminoisobutyrate + 2AB + N-Methylalanine +GABA	1006.75	1104.93	1059.69	644.759	859.397	692.407	1038.98	1003.63	1295.6	587.515	548.627	584.132	1075.84	985.715	949.198	477.19	468.258	602.418
LC-QE	3-Aminoisobutyrate + 2AB + N-Methylalanine +GABA (13C+1; 4.3%)	47.4109	52.2645	49.7501	30.7534	41.1632	33.1064	48.7058	47.9081	61.9569	28.7622	27.0996	29.2953	51.4568	46.7358	45.4569	23.432	23.282	29.3446
LC-QE	3-Aminoisobutyrate + 2AB + N-Methylalanine +GABA (13C+2; 0.1%)	3.96299	4.31915	4.23616	2.49675	3.33674	2.68479	4.64957	4.43273	5.85749	2.42206	2.30702	2.45276	7.93756	7.53165	6.98581	2.53807	2.57732	3.26199
LC-QE	3-Aminoisobutyrate + 2AB + N-Methylalanine +GABA (13C+3; 0%)	0.0426774	0.0447402	0.0160645	N.D.	N.D.	0.0195227	0.02473	N.D.	N.D.	N.D.	N.D.	N.D.	0.525585	0.507324	0.414515	N.D.	N.D.	N.D.
LC-QE	3-Aminoisobutyrate + 2AB + N-Methylalanine +GABA (13C+4; 0%)	N.D.	N.D.	N.D.	N.D.	N.D.	N.D.	N.D.	N.D.	N.D.	N.D.	N.D.	N.D.	N.D.	N.D.	N.D.	N.D.	N.D.	N.D.
LC-QE	Adenine	4.93211	5.31564	4.49361	4.96661	4.71028	4.08227	7.06229	6.77316	6.28924	5.69837	6.07974	5.98794	7.00003	7.32162	5.9379	4.52831	4.6705	5.32738
LC-QE	Adenine (13C+1; 5.4%)	0.278087	0.309016	0.262238	0.267261	0.281042	0.220724	0.551673	0.519232	0.511334	0.317892	0.361347	0.356565	0.71232	0.730325	0.57892	0.259552	0.299397	0.319867
LC-QE	Adenine (13C+2; 0.1%)	N.D.	N.D.	N.D.	N.D.	N.D.	N.D.	0.0245899	0.024836	0.0220896	N.D.	N.D.	N.D.	0.0753176	0.0812879	0.064003	N.D.	N.D.	N.D.
LC-QE	Adenine (13C+3; 0%)	N.D.	N.D.	N.D.	N.D.	N.D.	N.D.	N.D.	N.D.	N.D.	N.D.	N.D.	N.D.	N.D.	N.D.	N.D.	N.D.	N.D.	N.D.
LC-QE	Adenine (13C+4; 0%)	N.D.	N.D.	N.D.	N.D.	N.D.	N.D.	N.D.	N.D.	N.D.	N.D.	N.D.	N.D.	N.D.	N.D.	N.D.	N.D.	N.D.	N.D.
LC-QE	Adenine (13C+5; 0%)	N.D.	N.D.	N.D.	N.D.	N.D.	N.D.	N.D.	N.D.	N.D.	N.D.	N.D.	N.D.	N.D.	N.D.	N.D.	N.D.	N.D.	N.D.
LC-QE	Adenosine	1.09547	1.54423	1.69716	1.03898	1.15216	1.07086	1.8077	2.00525	2.35983	1.03288	0.88264	1.81272	1.86241	1.93215	1.65184	0.863201	0.99326	1.05216
LC-QE	Adenosine (13C+1; 10.8%)	0.0308774	0.0458311	0.0440991	0.0173892	0.0367871	N.D.	0.0855907	0.0996655	0.0875782	0.0178214	0.00373149	0.0195887	0.0358889	0.0182595	0.0251078	N.D.	0.00924269	0.00544759
LC-QE	Adenosine (13C+2; 0.5%)	N.D.	N.D.	N.D.	N.D.	N.D.	N.D.	N.D.	N.D.	N.D.	N.D.	N.D.	N.D.	N.D.	N.D.	N.D.	N.D.	N.D.	N.D.
LC-QE	Adenosine (13C+3; 0%)	N.D.	N.D.	N.D.	N.D.	N.D.	N.D.	N.D.	N.D.	N.D.	N.D.	N.D.	N.D.	N.D.	N.D.	N.D.	N.D.	N.D.	N.D.
LC-QE	Adenosine (13C+4; 0%)	N.D.	N.D.	N.D.	N.D.	N.D.	N.D.	N.D.	N.D.	N.D.	N.D.	N.D.	N.D.	N.D.	N.D.	N.D.	N.D.	N.D.	N.D.
LC-QE	Adenosine (13C+5; 0%)	N.D.	N.D.	N.D.	N.D.	N.D.	N.D.	0.450549	0.622288	0.629381	N.D.	N.D.	N.D.	0.978195	1.15173	0.920448	N.D.	N.D.	N.D.
LC-QE	Adenosine (13C+6; 0%)	N.D.	N.D.	N.D.	N.D.	N.D.	N.D.	N.D.	N.D.	N.D.	N.D.	N.D.	N.D.	N.D.	N.D.	N.D.	N.D.	N.D.	N.D.
LC-QE	Adenosine (13C+7; 0%)	N.D.	N.D.	N.D.	N.D.	N.D.	N.D.	N.D.	N.D.	N.D.	N.D.	N.D.	N.D.	N.D.	N.D.	N.D.	N.D.	N.D.	N.D.
LC-QE	Adenosine (13C+8; 0%)	N.D.	N.D.	N.D.	N.D.	N.D.	N.D.	N.D.	N.D.	N.D.	N.D.	N.D.	N.D.	N.D.	N.D.	N.D.	N.D.	N.D.	N.D.
LC-QE	Adenosine (13C+9; 0%)	N.D.	N.D.	N.D.	N.D.	N.D.	N.D.	N.D.	N.D.	N.D.	N.D.	N.D.	N.D.	N.D.	N.D.	N.D.	N.D.	N.D.	N.D.
LC-QE	Adenosine (13C+10; 0%)	N.D.	N.D.	N.D.	N.D.	N.D.	N.D.	N.D.	N.D.	N.D.	N.D.	N.D.	N.D.	N.D.	N.D.	N.D.	N.D.	N.D.	N.D.
LC-QE	Ala + beta-Ala	1078.16	1219.23	1175.95	635.741	719.741	677.605	1154.14	1271.1	1462.43	435.543	500.406	522.002	1182.82	1319.97	1191.73	393.249	394.474	435.681
LC-QE	Ala + beta-Ala (13C+1; 3.2%)	39.4957	45.0773	43.7111	23.0443	27.1466	25.7036	42.5825	46.7501	54.6521	16.3149	18.5517	19.7863	44.7241	49.8781	44.492	15.3497	15.218	17.6427
LC-QE	Ala + beta-Ala (13C+2; 0%)	5.29475	6.11597	6.01912	2.71649	3.04138	2.9392	5.83571	6.70372	8.03099	1.57608	2.28304	2.36915	7.25481	8.64572	7.62304	2.16489	2.22409	2.58606
LC-QE	Ala + beta-Ala (13C+3; 0%)	25.7465	28.3433	24.77	2.2173	2.6296	2.84668	58.0619	54.6928	68.09	5.43307	6.14259	6.55614	108.535	122.216	95.9912	12.0169	13.4402	14.8223
LC-QE	Cytidine	0.926008	1.83716	2.10423	0.996197	0.939507	0.91443	2.91224	3.31769	3.26659	0.448296	0.528577	0.497748	2.28754	2.44966	1.9712	0.367249	0.369249	0.316712
LC-QE	Cytidine (13C+1; 9.7%)	0.0467198	0.128748	0.171548	0.050572	0.0355835	0.0489468	0.195802	0.27392	0.236903	N.D.	N.D.	N.D.	0.176253	0.199909	0.174065	N.D.	N.D.	N.D.
LC-QE	Cytidine (13C+2; 0.4%)	N.D.	N.D.	N.D.	N.D.	N.D.	N.D.	N.D.	N.D.	N.D.	N.D.	N.D.	N.D.	N.D.	N.D.	N.D.	N.D.	N.D.	N.D.
LC-QE	Cytidine (13C+3; 0%)	N.D.	N.D.	N.D.	N.D.	N.D.	N.D.	N.D.	N.D.	N.D.	N.D.	N.D.	N.D.	N.D.	N.D.	N.D.	N.D.	N.D.	N.D.
LC-QE	Cytidine (13C+4; 0%)	N.D.	N.D.	N.D.	N.D.	N.D.	N.D.	N.D.	N.D.	N.D.	N.D.	N.D.	N.D.	N.D.	N.D.	N.D.	N.D.	N.D.	N.D.
LC-QE	Cytidine (13C+5; 0%)	N.D.	0.0828191	0.139965	N.D.	N.D.	N.D.	1.14687	1.40551	1.22496	N.D.	N.D.	N.D.	1.97436	2.19706	1.82768	N.D.	N.D.	N.D.
LC-QE	Cytidine (13C+6; 0%)	N.D.	N.D.	N.D.	N.D.	N.D.	N.D.	N.D.	N.D.	N.D.	N.D.	N.D.	N.D.	0.172118	0.214191	0.164109	N.D.	N.D.	N.D.
LC-QE	Cytidine (13C+7; 0%)	N.D.	N.D.	N.D.	N.D.	N.D.	N.D.	0.012628	0.0232765	0.0259723	N.D.	N.D.	N.D.	0.171029	0.195577	0.148263	N.D.	N.D.	N.D.
LC-QE	Cytidine (13C+8; 0%)	N.D.	N.D.	N.D.	N.D.	N.D.	N.D.	N.D.	N.D.	N.D.	N.D.	N.D.	N.D.	N.D.	N.D.	N.D.	N.D.	N.D.	N.D.
LC-QE	Cytidine (13C+9; 0%)	N.D.	N.D.	N.D.	N.D.	N.D.	N.D.	N.D.	N.D.	N.D.	N.D.	N.D.	N.D.	N.D.	N.D.	N.D.	N.D.	N.D.	N.D.
LC-QE	Dihydrouracil	N.D.	N.D.	N.D.	N.D.	N.D.	N.D.	N.D.	N.D.	N.D.	N.D.	N.D.	N.D.	N.D.	N.D.	N.D.	N.D.	N.D.	N.D.
LC-QE	Dihydrouracil (13C+1; 4.3%)	N.D.	N.D.	N.D.	N.D.	N.D.	N.D.	N.D.	N.D.	N.D.	N.D.	N.D.	N.D.	N.D.	N.D.	N.D.	N.D.	N.D.	N.D.
LC-QE	Dihydrouracil (13C+2; 0.1%)	N.D.	N.D.	N.D.	N.D.	N.D.	N.D.	N.D.	N.D.	N.D.	N.D.	N.D.	N.D.	N.D.	N.D.	N.D.	N.D.	N.D.	N.D.
LC-QE	Dihydrouracil (13C+3; 0%)	N.D.	N.D.	N.D.	N.D.	N.D.	N.D.	N.D.	N.D.	N.D.	N.D.	N.D.	N.D.	N.D.	N.D.	N.D.	N.D.	N.D.	N.D.
LC-QE	Dihydrouracil (13C+4; 0%)	N.D.	N.D.	N.D.	N.D.	N.D.	N.D.	N.D.	N.D.	N.D.	N.D.	N.D.	N.D.	N.D.	N.D.	N.D.	N.D.	N.D.	N.D.
LC-QE	Gln	5494.83	5840.14	5659.17	4780.61	5470.16	4676.79	9444.25	9651.13	10494.9	5063.33	5497.39	5859.91	10391.8	10322.4	9628.11	5445	5901.85	7409.04
LC-QE	Gln (13C+1; 5.4%)	311.28	331.471	319.66	269.886	308.898	267.153	538.422	547.25	598.327	285.167	309.945	333.501	589.862	585.716	551.98	307.667	333.154	418.206
LC-QE	Gln (13C+2; 0.1%)	32.8641	34.8189	34.0704	28.7547	33.0352	28.6757	57.3019	58.5586	62.8502	29.7121	32.9444	35.5366	62.6043	62.7584	58.3855	33.7791	34.605	44.8107
LC-QE	Gln (13C+3; 0%)	1.36456	1.12871	1.35494	0.961933	1.11881	1.07515	2.46284	2.45455	2.41431	0.957093	1.19996	1.18475	2.68295	2.73324	2.53706	1.22582	1.28235	1.65021
LC-QE	Gln (13C+4; 0%)	N.D.	N.D.	N.D.	N.D.	N.D.	N.D.	N.D.	N.D.	N.D.	N.D.	N.D.	N.D.	N.D.	N.D.	N.D.	N.D.	N.D.	N.D.
LC-QE	Gln (13C+5; 0%)	N.D.	N.D.	N.D.	N.D.	N.D.	N.D.	N.D.	N.D.	N.D.	N.D.	N.D.	N.D.	N.D.	N.D.	N.D.	N.D.	N.D.	N.D.
LC-QE	Guanine	0.0784429	0.102579	0.0837763	0.103033	0.112137	0.0946125	0.112623	0.109859	0.10594	0.0602232	0.0821775	0.100946	0.129521	0.135347	0.0864161	0.0638042	0.0796288	0.064703
LC-QE	Guanine (13C+1; 5.4%)	N.D.	N.D.	N.D.	N.D.	N.D.	N.D.	N.D.	N.D.	N.D.	N.D.	N.D.	N.D.	N.D.	N.D.	N.D.	N.D.	N.D.	N.D.
LC-QE	Guanine (13C+2; 0.1%)	N.D.	N.D.	N.D.	N.D.	N.D.	N.D.	N.D.	N.D.	N.D.	N.D.	N.D.	N.D.	N.D.	N.D.	N.D.	N.D.	N.D.	N.D.
LC-QE	Guanine (13C+3; 0%)	N.D.	N.D.	N.D.	N.D.	N.D.	N.D.	N.D.	N.D.	N.D.	N.D.	N.D.	N.D.	N.D.	N.D.	N.D.	N.D.	N.D.	N.D.
LC-QE	Guanine (13C+4; 0%)	N.D.	N.D.	N.D.	N.D.	N.D.	N.D.	N.D.	N.D.	N.D.	N.D.	N.D.	N.D.	N.D.	N.D.	N.D.	N.D.	N.D.	N.D.
LC-QE	Guanine (13C+5; 0%)	N.D.	N.D.	N.D.	N.D.	N.D.	N.D.	N.D.	N.D.	N.D.	N.D.	N.D.	N.D.	N.D.	N.D.	N.D.	N.D.	N.D.	N.D.
LC-QE	Guanosine	N.D.	N.D.	N.D.	N.D.	N.D.	N.D.	N.D.	N.D.	N.D.	N.D.	N.D.	N.D.	N.D.	N.D.	N.D.	N.D.	N.D.	N.D.
LC-QE	Guanosine (13C+1; 10.8%)	N.D.	N.D.	N.D.	N.D.	N.D.	N.D.	N.D.	N.D.	N.D.	N.D.	N.D.	N.D.	N.D.	N.D.	N.D.	N.D.	N.D.	N.D.
LC-QE	Guanosine (13C+2; 0.5%)	N.D.	N.D.	N.D.	N.D.	N.D.	N.D.	N.D.	N.D.	N.D.	N.D.	N.D.	N.D.	N.D.	N.D.	N.D.	N.D.	N.D.	N.D.
LC-QE	Guanosine (13C+3; 0%)	N.D.	N.D.	N.D.	N.D.	N.D.	N.D.	N.D.	N.D.	N.D.	N.D.	N.D.	N.D.	N.D.	N.D.	N.D.	N.D.	N.D.	N.D.
LC-QE	Guanosine (13C+4; 0%)	N.D.	N.D.	N.D.	N.D.	N.D.	N.D.	N.D.	N.D.	N.D.	N.D.	N.D.	N.D.	N.D.	N.D.	N.D.	N.D.	N.D.	N.D.
LC-QE	Guanosine (13C+5; 0%)	N.D.	N.D.	N.D.	N.D.	N.D.	N.D.	N.D.	N.D.	N.D.	N.D.	N.D.	N.D.	N.D.	N.D.	N.D.	N.D.	N.D.	N.D.
LC-QE	Guanosine (13C+6; 0%)	N.D.	N.D.	N.D.	N.D.	N.D.	N.D.	N.D.	N.D.	N.D.	N.D.	N.D.	N.D.	N.D.	N.D.	N.D.	N.D.	N.D.	N.D.
LC-QE	Guanosine (13C+7; 0%)	N.D.	N.D.	N.D.	N.D.	N.D.	N.D.	N.D.	N.D.	N.D.	N.D.	N.D.	N.D.	N.D.	N.D.	N.D.	N.D.	N.D.	N.D.
LC-QE	Guanosine (13C+8; 0%)	N.D.	N.D.	N.D.	N.D.	N.D.	N.D.	N.D.	N.D.	N.D.	N.D.	N.D.	N.D.	N.D.	N.D.	N.D.	N.D.	N.D.	N.D.
LC-QE	Guanosine (13C+9; 0%)	N.D.	N.D.	N.D.	N.D.	N.D.	N.D.	N.D.	N.D.	N.D.	N.D.	N.D.	N.D.	N.D.	N.D.	N.D.	N.D.	N.D.	N.D.
LC-QE	Guanosine (13C+10; 0%)	N.D.	N.D.	N.D.	N.D.	N.D.	N.D.	N.D.	N.D.	N.D.	N.D.	N.D.	N.D.	N.D.	N.D.	N.D.	N.D.	N.D.	N.D.
LC-QE	Hypoxanthine	0.525305	0.473847	0.206166	0.0149865	0.0127648	N.D.	0.155908	0.141703	0.233982	0.0132396	N.D.	N.D.	0.182823	0.138296	0.17011	0.237096	N.D.	N.D.
LC-QE	Hypoxanthine (13C+1; 5.4%)	N.D.	N.D.	N.D.	N.D.	N.D.	N.D.	N.D.	N.D.	N.D.	N.D.	N.D.	N.D.	N.D.	N.D.	N.D.	N.D.	N.D.	N.D.
LC-QE	Hypoxanthine (13C+2; 0.1%)	9.74557	6.47312	3.54553	3.81269	6.22325	4.19846	7.70119	5.70933	5.48229	4.68667	7.65988	6.80997	9.74907	11.5124	8.98388	5.45046	6.60981	4.90462
LC-QE	Hypoxanthine (13C+3; 0%)	0.597895	0.346784	0.13311	0.203443	0.334296	0.212857	0.42538	0.285291	0.237218	0.197229	0.413658	0.381189	0.590924	0.639385	0.516428	0.337548	0.355228	0.145352
LC-QE	Hypoxanthine (13C+4; 0%)	N.D.	N.D.	N.D.	N.D.	N.D.	N.D.	N.D.	N.D.	N.D.	N.D.	N.D.	N.D.	N.D.	N.D.	N.D.	N.D.	N.D.	N.D.
LC-QE	Hypoxanthine (13C+5; 0%)	N.D.	N.D.	N.D.	N.D.	N.D.	N.D.	N.D.	N.D.	N.D.	N.D.	N.D.	N.D.	N.D.	N.D.	N.D.	N.D.	N.D.	N.D.
LC-QE	Inosine	0.221041	0.175802	0.187826	0.0708015	0.0320241	0.0512736	0.12032	0.105673	0.181324	0.0248006	0.0142211	0.0423668	0.162769	0.215827	0.175887	0.102674	0.0539514	0.0319545
LC-QE	Inosine (13C+1; 10.8%)	N.D.	N.D.	N.D.	N.D.	N.D.	N.D.	N.D.	N.D.	N.D.	N.D.	N.D.	N.D.	N.D.	N.D.	N.D.	N.D.	N.D.	N.D.
LC-QE	Inosine (13C+2; 0.5%)	N.D.	N.D.	N.D.	N.D.	N.D.	N.D.	N.D.	N.D.	N.D.	N.D.	N.D.	N.D.	N.D.	N.D.	N.D.	N.D.	N.D.	N.D.
LC-QE	Inosine (13C+3; 0%)	N.D.	N.D.	N.D.	N.D.	N.D.	N.D.	N.D.	N.D.	N.D.	N.D.	N.D.	N.D.	N.D.	N.D.	N.D.	N.D.	N.D.	N.D.
LC-QE	Inosine (13C+4; 0%)	N.D.	N.D.	N.D.	N.D.	N.D.	N.D.	N.D.	N.D.	N.D.	N.D.	N.D.	N.D.	N.D.	N.D.	N.D.	N.D.	N.D.	N.D.
LC-QE	Inosine (13C+5; 0%)	0.181437	0.0394879	0.0327345	N.D.	N.D.	N.D.	N.D.	N.D.	0.00422739	N.D.	N.D.	N.D.	0.0176702	0.0296676	N.D.	N.D.	N.D.	N.D.
LC-QE	Inosine (13C+6; 0%)	N.D.	N.D.	N.D.	N.D.	N.D.	N.D.	N.D.	N.D.	N.D.	N.D.	N.D.	N.D.	N.D.	N.D.	N.D.	N.D.	N.D.	N.D.
LC-QE	Inosine (13C+7; 0%)	N.D.	N.D.	N.D.	N.D.	N.D.	N.D.	N.D.	N.D.	N.D.	N.D.	N.D.	N.D.	N.D.	N.D.	N.D.	N.D.	N.D.	N.D.
LC-QE	Inosine (13C+8; 0%)	N.D.	N.D.	N.D.	N.D.	N.D.	N.D.	N.D.	N.D.	N.D.	N.D.	N.D.	N.D.	N.D.	N.D.	N.D.	N.D.	N.D.	N.D.
LC-QE	Inosine (13C+9; 0%)	N.D.	N.D.	N.D.	N.D.	N.D.	N.D.	N.D.	N.D.	N.D.	N.D.	N.D.	N.D.	N.D.	N.D.	N.D.	N.D.	N.D.	N.D.
LC-QE	Inosine (13C+10; 0%)	N.D.	N.D.	N.D.	N.D.	N.D.	N.D.	N.D.	N.D.	N.D.	N.D.	N.D.	N.D.	N.D.	N.D.	N.D.	N.D.	N.D.	N.D.
LC-QE	Thymine	N.D.	N.D.	N.D.	N.D.	N.D.	N.D.	N.D.	N.D.	N.D.	N.D.	N.D.	N.D.	N.D.	N.D.	N.D.	N.D.	N.D.	N.D.
LC-QE	Thymine (13C+1; 5.4%)	N.D.	N.D.	N.D.	N.D.	N.D.	N.D.	N.D.	N.D.	N.D.	N.D.	N.D.	N.D.	N.D.	N.D.	N.D.	N.D.	N.D.	N.D.
LC-QE	Thymine (13C+2; 0.1%)	N.D.	N.D.	N.D.	N.D.	N.D.	N.D.	N.D.	N.D.	N.D.	N.D.	N.D.	N.D.	N.D.	N.D.	N.D.	N.D.	N.D.	N.D.
LC-QE	Thymine (13C+3; 0%)	N.D.	N.D.	N.D.	N.D.	N.D.	N.D.	N.D.	N.D.	N.D.	N.D.	N.D.	N.D.	N.D.	N.D.	N.D.	N.D.	N.D.	N.D.
LC-QE	Thymine (13C+4; 0%)	N.D.	N.D.	N.D.	N.D.	N.D.	N.D.	N.D.	N.D.	N.D.	N.D.	N.D.	N.D.	N.D.	N.D.	N.D.	N.D.	N.D.	N.D.
LC-QE	Thymine (13C+5; 0%)	N.D.	N.D.	N.D.	N.D.	N.D.	N.D.	N.D.	N.D.	N.D.	N.D.	N.D.	N.D.	N.D.	N.D.	N.D.	N.D.	N.D.	N.D.
LC-QE	Uracil	N.D.	N.D.	N.D.	N.D.	N.D.	N.D.	N.D.	N.D.	N.D.	N.D.	N.D.	N.D.	N.D.	N.D.	N.D.	N.D.	N.D.	N.D.
LC-QE	Uracil (13C+1; 4.3%)	N.D.	N.D.	N.D.	N.D.	N.D.	N.D.	N.D.	N.D.	N.D.	N.D.	N.D.	N.D.	N.D.	N.D.	N.D.	N.D.	N.D.	N.D.
LC-QE	Uracil (13C+2; 0.1%)	N.D.	N.D.	N.D.	N.D.	N.D.	N.D.	N.D.	N.D.	N.D.	N.D.	N.D.	N.D.	N.D.	N.D.	N.D.	N.D.	N.D.	N.D.
LC-QE	Uracil (13C+3; 0%)	N.D.	N.D.	N.D.	N.D.	N.D.	N.D.	N.D.	N.D.	N.D.	N.D.	N.D.	N.D.	N.D.	N.D.	N.D.	N.D.	N.D.	N.D.
LC-QE	Uracil (13C+4; 0%)	N.D.	N.D.	N.D.	N.D.	N.D.	N.D.	N.D.	N.D.	N.D.	N.D.	N.D.	N.D.	N.D.	N.D.	N.D.	N.D.	N.D.	N.D.
LC-QE	Urea	168.232	174.603	148.097	153.233	148.827	147.734	221.365	202.074	173.607	178	216.524	187.501	220.146	244.265	207.674	185.467	183.27	193.575
LC-QE	Urea (13C+1; 1.1%)	1.2655	1.04926	0.866825	1.06488	0.858043	0.856222	1.59083	1.13639	0.997038	1.10479	1.33799	1.01974	1.35239	1.81409	1.43371	1.25711	1.11279	0.959714
LC-QE	Uridine	2.14914	8.04206	5.47297	19.276	N.D.	17.3653	27.6881	90.1556	41.8032	3.28216	9.54384	N.D.	10.3505	55.8191	26.363	N.D.	2.75581	N.D.
LC-QE	Uridine (13C+1; 9.7%)	N.D.	N.D.	N.D.	N.D.	N.D.	N.D.	N.D.	N.D.	N.D.	N.D.	N.D.	N.D.	N.D.	N.D.	N.D.	N.D.	N.D.	N.D.
LC-QE	Uridine (13C+2; 0.4%)	N.D.	N.D.	N.D.	N.D.	N.D.	N.D.	N.D.	N.D.	N.D.	N.D.	N.D.	N.D.	N.D.	N.D.	N.D.	N.D.	N.D.	N.D.
LC-QE	Uridine (13C+3; 0%)	N.D.	N.D.	N.D.	N.D.	N.D.	N.D.	N.D.	N.D.	N.D.	N.D.	N.D.	N.D.	N.D.	N.D.	N.D.	N.D.	N.D.	N.D.
LC-QE	Uridine (13C+4; 0%)	N.D.	N.D.	N.D.	N.D.	N.D.	N.D.	N.D.	N.D.	N.D.	N.D.	N.D.	N.D.	N.D.	N.D.	N.D.	N.D.	N.D.	N.D.
LC-QE	Uridine (13C+5; 0%)	N.D.	N.D.	N.D.	N.D.	N.D.	N.D.	15.0913	31.7526	38.3104	N.D.	N.D.	N.D.	38.1959	103.425	73.002	N.D.	N.D.	N.D.
LC-QE	Uridine (13C+6; 0%)	N.D.	N.D.	N.D.	N.D.	N.D.	N.D.	N.D.	N.D.	N.D.	N.D.	N.D.	N.D.	N.D.	N.D.	N.D.	N.D.	N.D.	N.D.
LC-QE	Uridine (13C+7; 0%)	N.D.	N.D.	N.D.	N.D.	N.D.	N.D.	N.D.	N.D.	N.D.	N.D.	N.D.	N.D.	N.D.	N.D.	N.D.	N.D.	N.D.	N.D.
LC-QE	Uridine (13C+8; 0%)	N.D.	N.D.	N.D.	N.D.	N.D.	N.D.	N.D.	N.D.	N.D.	N.D.	N.D.	N.D.	N.D.	N.D.	N.D.	N.D.	N.D.	N.D.
LC-QE	Uridine (13C+9; 0%)	N.D.	N.D.	N.D.	N.D.	N.D.	N.D.	N.D.	N.D.	N.D.	N.D.	N.D.	N.D.	N.D.	N.D.	N.D.	N.D.	N.D.	N.D.
LC-QE	Xanthine	N.D.	N.D.	N.D.	N.D.	N.D.	N.D.	N.D.	N.D.	N.D.	N.D.	N.D.	N.D.	N.D.	N.D.	N.D.	N.D.	N.D.	N.D.
LC-QE	Xanthine (13C+1; 5.4%)	N.D.	N.D.	N.D.	N.D.	N.D.	N.D.	N.D.	N.D.	N.D.	N.D.	N.D.	N.D.	N.D.	N.D.	N.D.	N.D.	N.D.	N.D.
LC-QE	Xanthine (13C+2; 0.1%)	N.D.	82.0898	N.D.	N.D.	N.D.	N.D.	N.D.	N.D.	N.D.	N.D.	N.D.	N.D.	N.D.	N.D.	N.D.	N.D.	N.D.	N.D.
LC-QE	Xanthine (13C+3; 0%)	N.D.	N.D.	N.D.	N.D.	N.D.	N.D.	N.D.	N.D.	N.D.	N.D.	N.D.	N.D.	N.D.	N.D.	N.D.	N.D.	N.D.	N.D.
LC-QE	Xanthine (13C+4; 0%)	N.D.	N.D.	N.D.	N.D.	N.D.	N.D.	N.D.	N.D.	N.D.	N.D.	N.D.	N.D.	N.D.	N.D.	N.D.	N.D.	N.D.	N.D.
LC-QE	Xanthine (13C+5; 0%)	N.D.	N.D.	N.D.	N.D.	N.D.	N.D.	N.D.	N.D.	N.D.	N.D.	N.D.	N.D.	N.D.	N.D.	N.D.	N.D.	N.D.	N.D.
LC-QE	Xanthosine	N.D.	N.D.	N.D.	N.D.	N.D.	N.D.	N.D.	N.D.	N.D.	N.D.	N.D.	N.D.	N.D.	N.D.	N.D.	N.D.	N.D.	N.D.
LC-QE	Xanthosine (13C+1; 10.8%)	N.D.	N.D.	N.D.	N.D.	N.D.	N.D.	N.D.	N.D.	N.D.	N.D.	N.D.	N.D.	N.D.	N.D.	N.D.	N.D.	N.D.	N.D.
LC-QE	Xanthosine (13C+2; 0.5%)	N.D.	N.D.	N.D.	N.D.	N.D.	N.D.	N.D.	N.D.	N.D.	N.D.	N.D.	N.D.	N.D.	N.D.	N.D.	N.D.	N.D.	N.D.
LC-QE	Xanthosine (13C+3; 0%)	N.D.	N.D.	N.D.	N.D.	N.D.	N.D.	N.D.	N.D.	N.D.	N.D.	N.D.	N.D.	N.D.	N.D.	N.D.	N.D.	N.D.	N.D.
LC-QE	Xanthosine (13C+4; 0%)	N.D.	N.D.	N.D.	N.D.	N.D.	N.D.	N.D.	N.D.	N.D.	N.D.	N.D.	N.D.	N.D.	N.D.	N.D.	N.D.	N.D.	N.D.
LC-QE	Xanthosine (13C+5; 0%)	N.D.	N.D.	N.D.	N.D.	N.D.	N.D.	N.D.	N.D.	N.D.	N.D.	N.D.	N.D.	N.D.	N.D.	N.D.	N.D.	N.D.	N.D.
LC-QE	Xanthosine (13C+6; 0%)	N.D.	N.D.	N.D.	N.D.	N.D.	N.D.	N.D.	N.D.	N.D.	N.D.	N.D.	N.D.	N.D.	N.D.	N.D.	N.D.	N.D.	N.D.
LC-QE	Xanthosine (13C+7; 0%)	N.D.	N.D.	N.D.	N.D.	N.D.	N.D.	N.D.	N.D.	N.D.	N.D.	N.D.	N.D.	N.D.	N.D.	N.D.	N.D.	N.D.	N.D.
LC-QE	Xanthosine (13C+8; 0%)	N.D.	N.D.	N.D.	N.D.	N.D.	N.D.	N.D.	N.D.	N.D.	N.D.	N.D.	N.D.	N.D.	N.D.	N.D.	N.D.	N.D.	N.D.
LC-QE	Xanthosine (13C+9; 0%)	N.D.	N.D.	N.D.	N.D.	N.D.	N.D.	N.D.	N.D.	N.D.	N.D.	N.D.	N.D.	N.D.	N.D.	N.D.	N.D.	N.D.	N.D.
LC-QE	Xanthosine (13C+10; 0%)	N.D.	N.D.	N.D.	N.D.	N.D.	N.D.	N.D.	N.D.	N.D.	N.D.	N.D.	N.D.	N.D.	N.D.	N.D.	N.D.	N.D.	N.D.
LC-QE	Gly	8017.44	9085.15	8687.32	8669.59	9786.32	9366.82	12849	14021.1	14991.5	8433.62	9700.04	10127.4	14437.4	16197.6	14928.4	9695.83	10191.3	11473.1
LC-QE	Gly (13C+1; 2.2%)	104.942	122.889	121.913	115.053	129.675	133.207	174.842	199.875	212.575	98.793	120.626	135.147	207.583	236.285	216.169	137.134	127.325	156.534
LC-QE	Gly (13C+2; 0%)	44.96	45.5283	53.4689	6.06598	8.21075	11.5407	180.168	208.345	252.105	6.29693	20.2812	21.9917	332.545	402.948	345.266	29.4537	28.0945	17.6345
LC-QE	Asp	4155.3	4651.15	4694.14	9839.26	11102.1	11155.6	6376.66	7178.01	8194.6	12674.2	15177.3	15476	6196.09	6758.54	6326.18	11791.3	12019.3	13604.4
LC-QE	Asp (13C+1; 4.3%)	181.27	202.811	204.633	437.902	502.086	513.051	337.301	380.064	451.209	801.575	932.371	1011.94	388.72	417.791	392.868	850.714	849.669	949.731
LC-QE	Asp (13C+2; 0.1%)	35.6377	41.724	48.4189	164.569	193.608	209.999	1027.92	1153.46	1503.75	910.396	1106.36	1164.91	1650.34	1825.24	1686.2	1104.92	1072.13	1242
LC-QE	Asp (13C+3; 0%)	52.3492	58.663	60.9961	5.92767	6.21565	8.27722	394.34	423.471	599.48	94.4281	116.991	124.709	739.677	812.999	758.266	152.457	142.145	164.693
LC-QE	Asp (13C+4; 0%)	N.D.	N.D.	N.D.	N.D.	N.D.	N.D.	40.5763	47.4379	77.4384	N.D.	N.D.	N.D.	143.664	168.192	154.952	8.39756	8.03491	9.09715
The numbers in parentheses indicate the percentages of naturally occurring isotopes
