# Supplementary figures and images for: Metabolic clogging of mannose triggers dNTP loss and genomic instability in human cancer cells
Source: eLife journal article supplement (doi:10.7554/elife.83870), 2023-06-13

Figure 1-source data 1

full raw unedited blots ( $\beta$ -Actin)

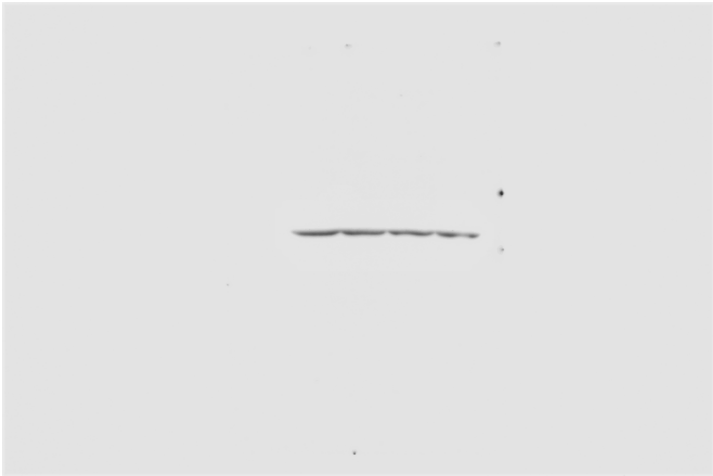

full raw unedited blots (MPI)

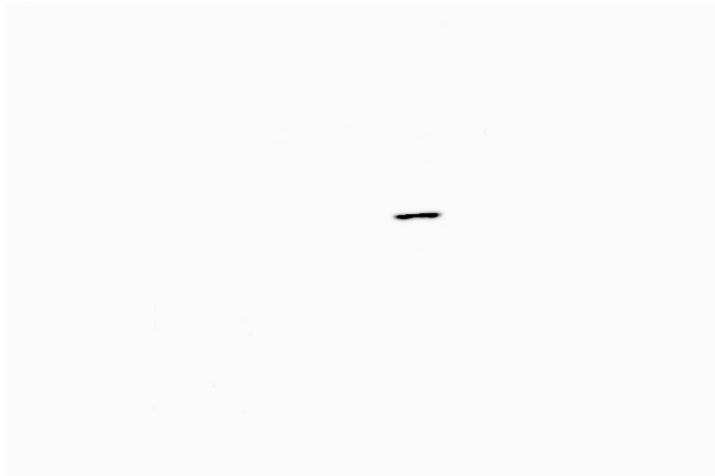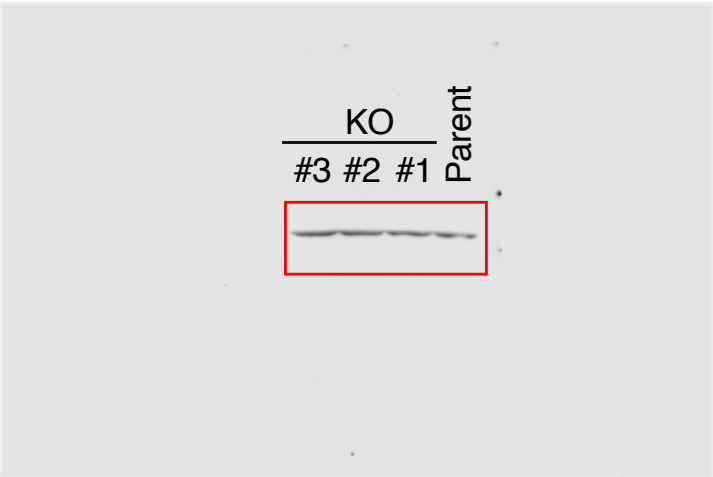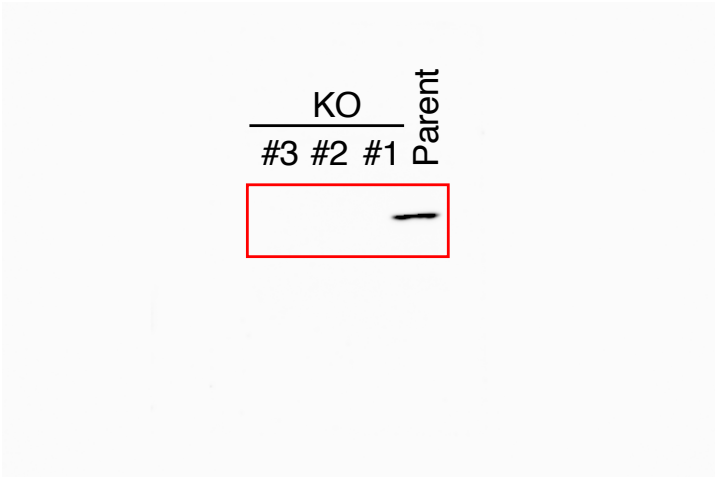

**A**

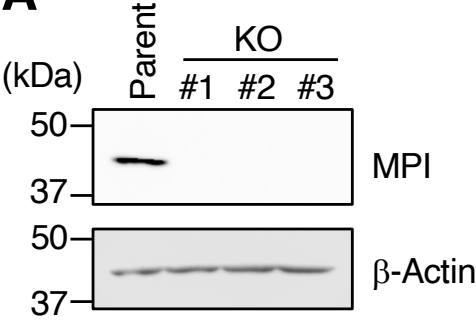

Supplement: fig1-data1 [file elife-83870-fig1-data1-v1.zip]

Figure 1-source data 2

full raw unedited blots ( $\beta$ -Actin)

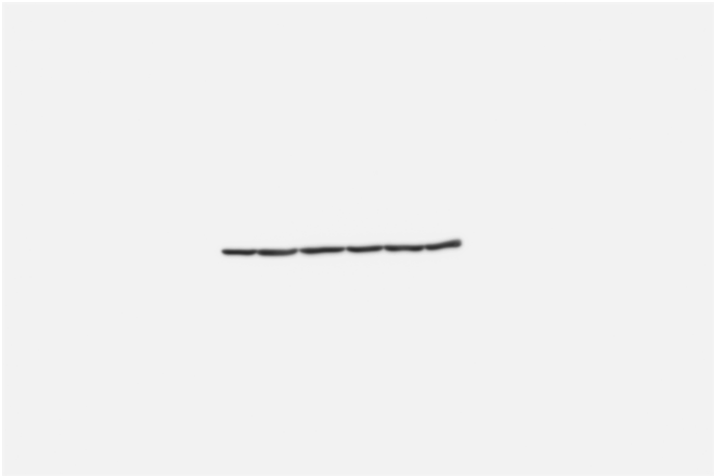

full raw unedited blots (MPI)

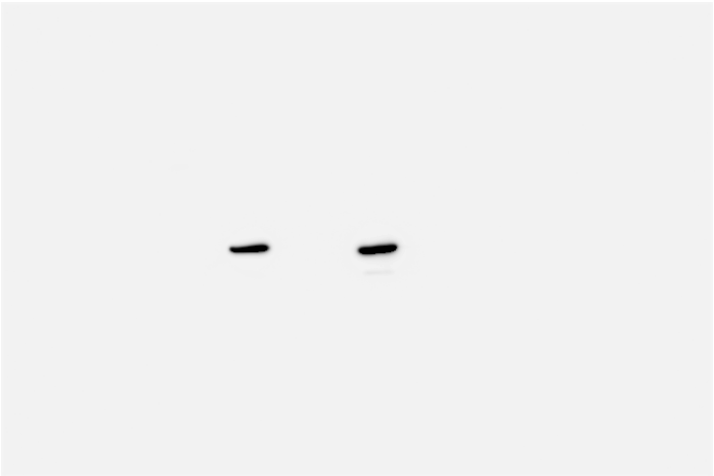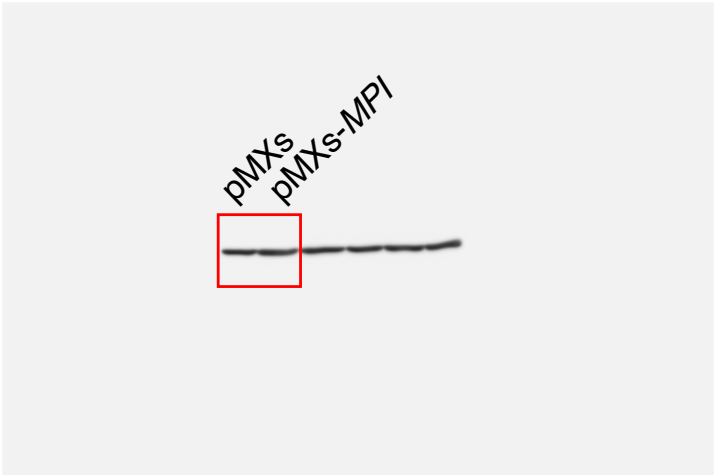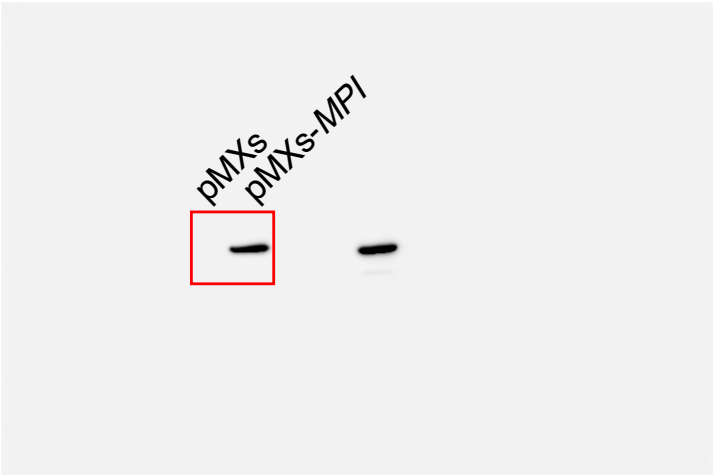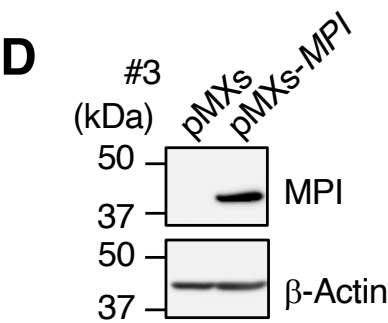

Supplement: fig1-data2 [file elife-83870-fig1-data2-v1.zip]

Figure 1-source data 3

full raw unedited blots ( $\beta$ -Actin)

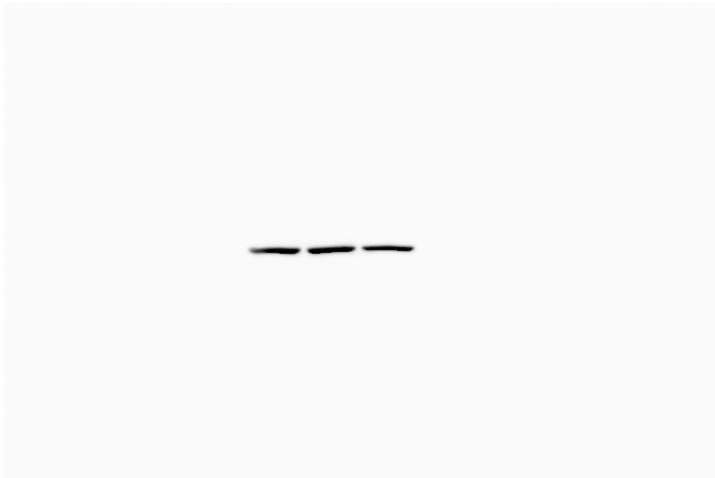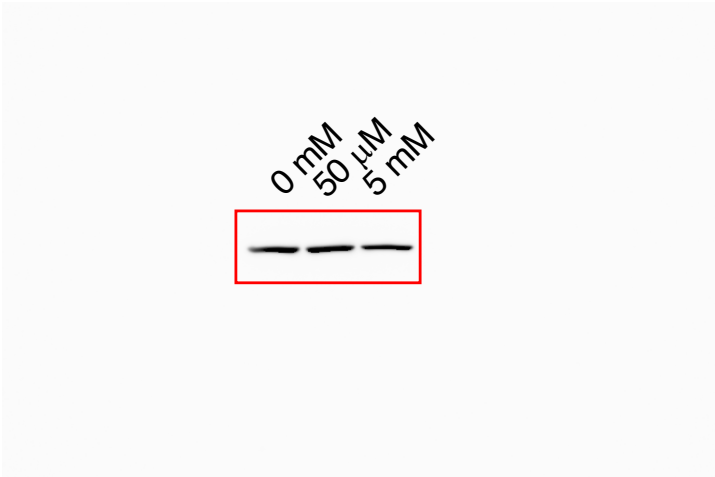

full raw unedited blots (Con A)

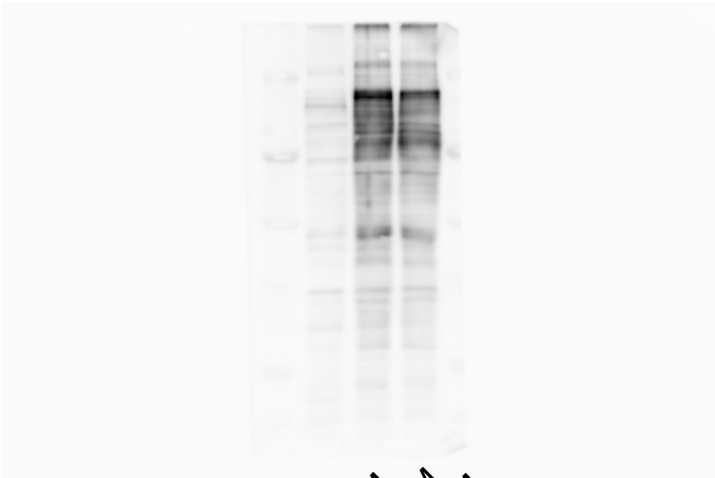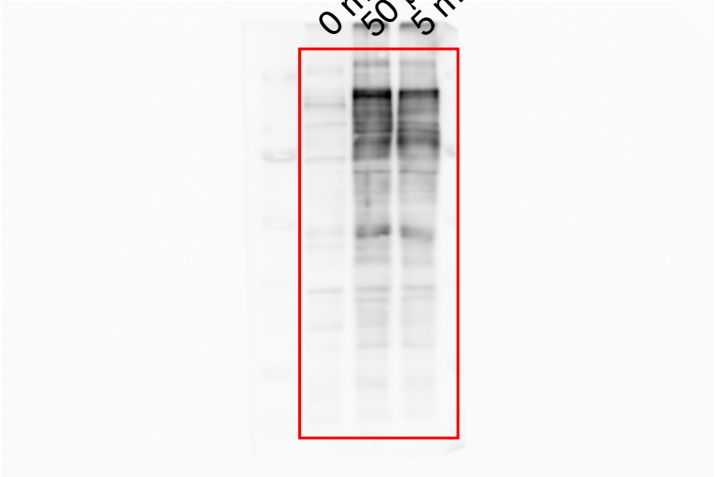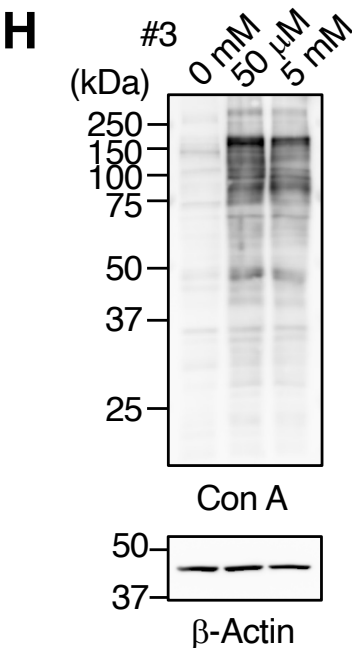

Supplement: fig1-data3 [file elife-83870-fig1-data3-v1.zip]

Figure 1-figure supplement 2-source data 1

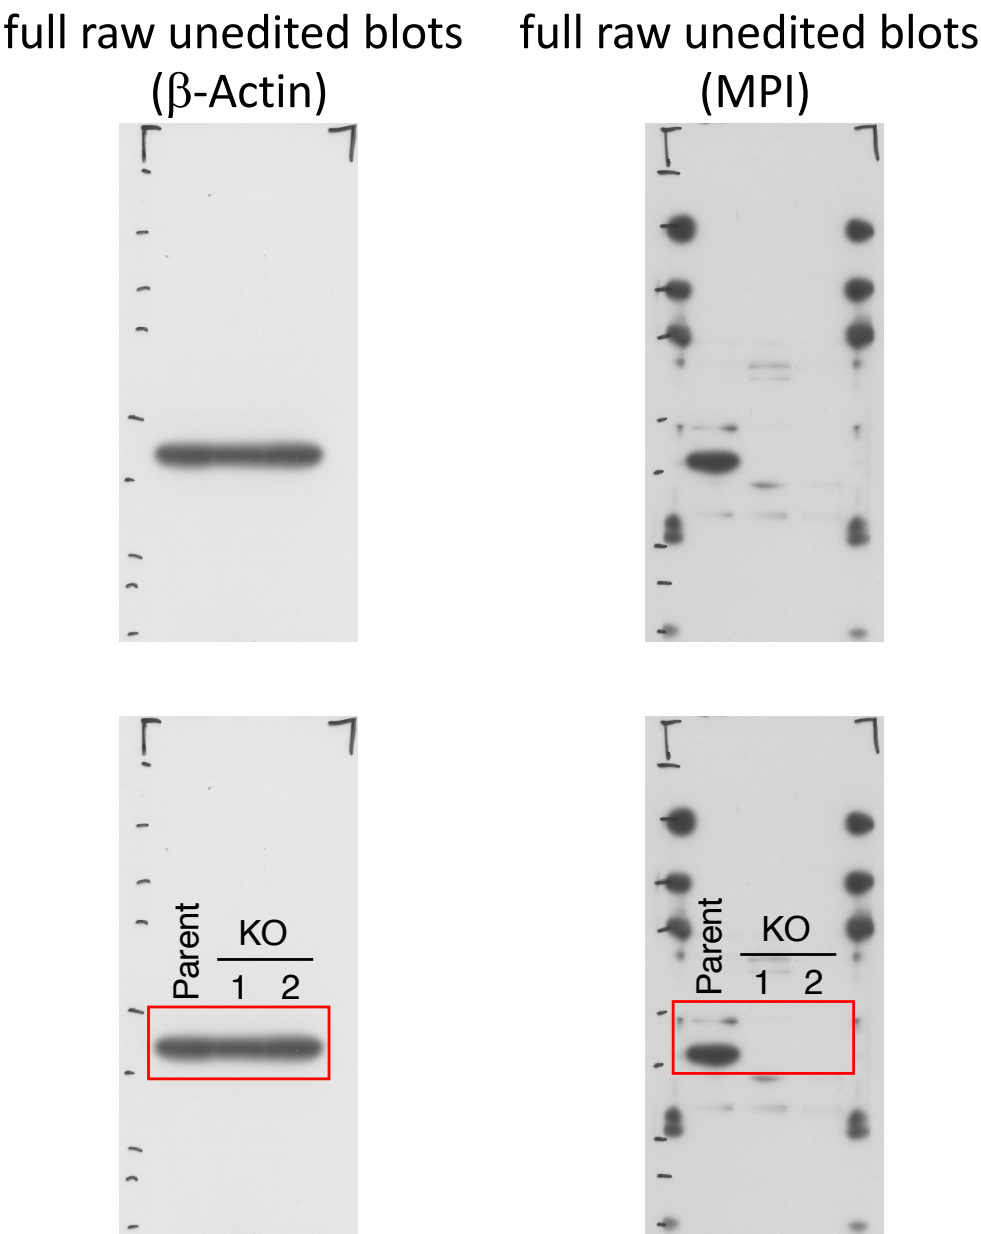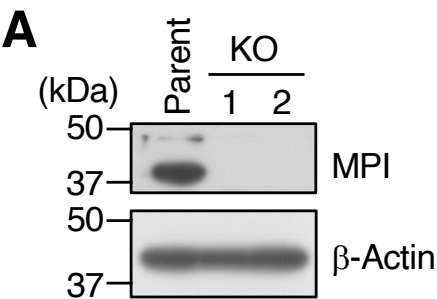

Supplement: fig1-figsupp3-data1 [file elife-83870-fig1-figsupp3-data1-v1.zip]

Figure 1-figure supplement 2-source data 2

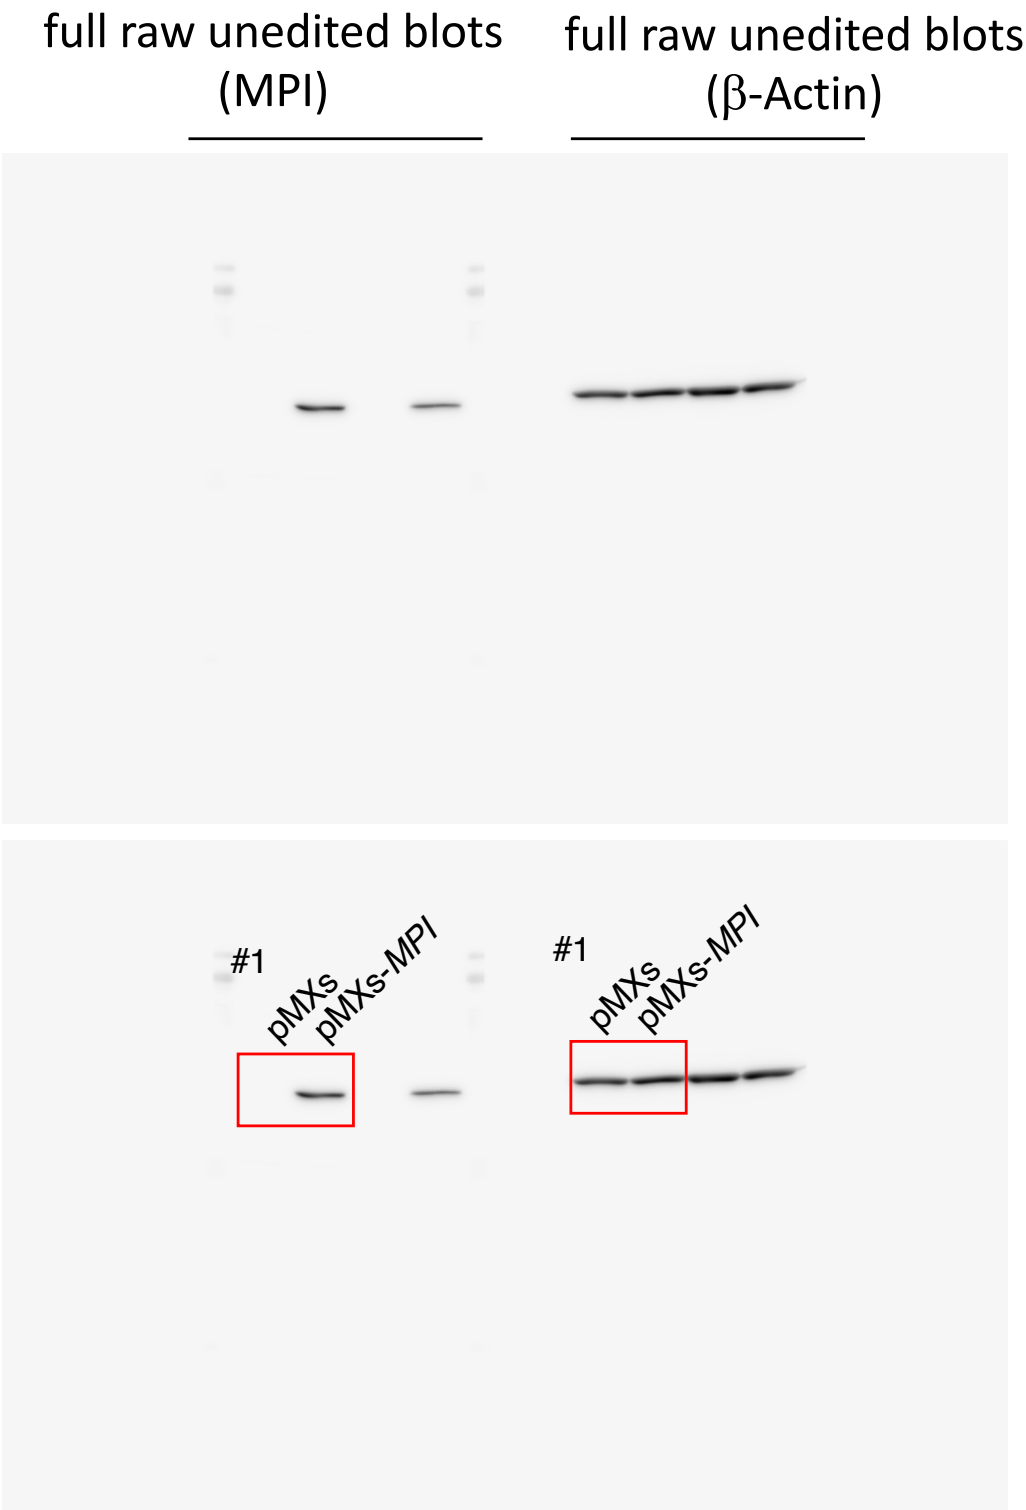

**D**

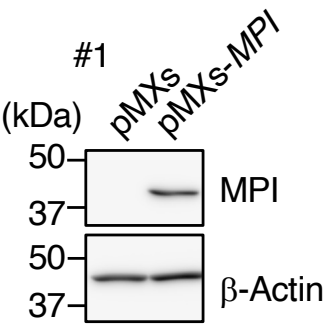

Supplement: fig1-figsupp3-data2 [file elife-83870-fig1-figsupp3-data2-v1.zip]

Figure 1-figure supplement 2-source data 3

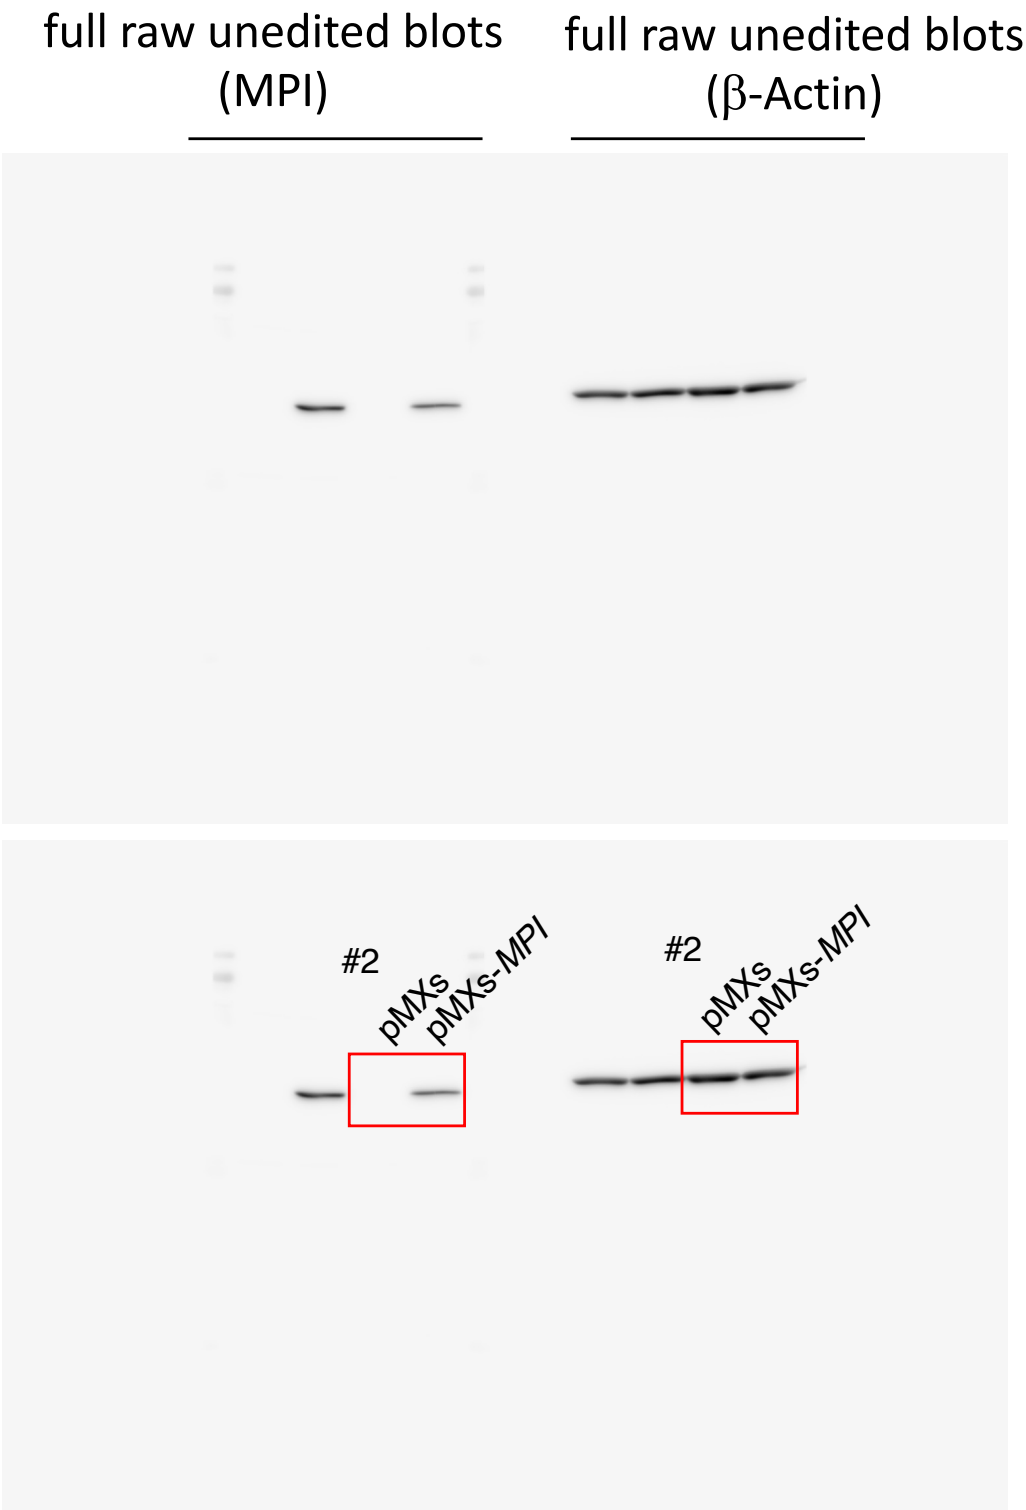

**E**

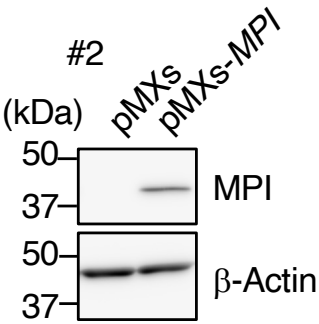

Supplement: fig1-figsupp3-data3 [file elife-83870-fig1-figsupp3-data3-v1.zip]

Figure 3-source data 4

full raw unedited blots  
(ORC2)

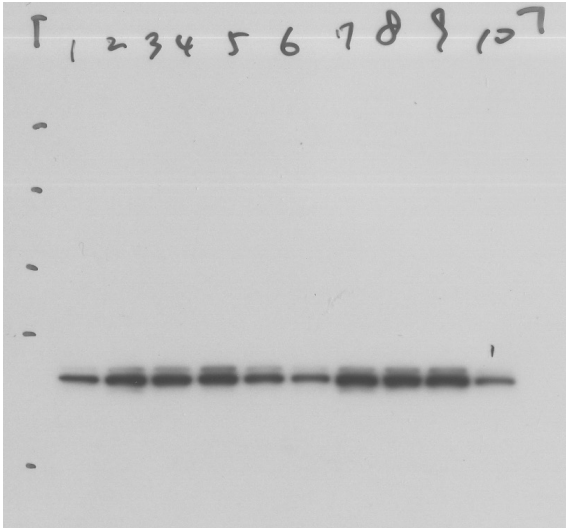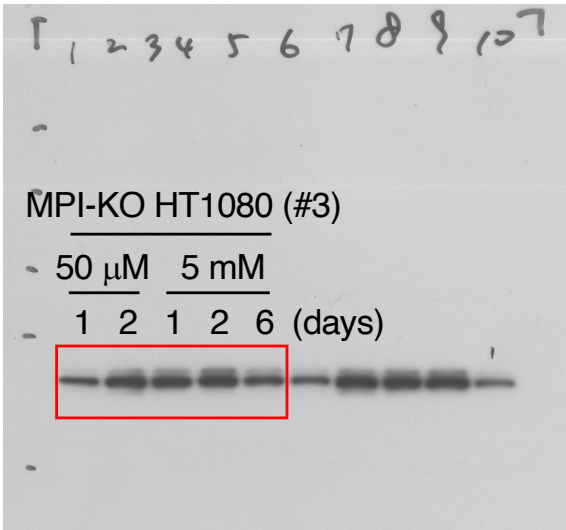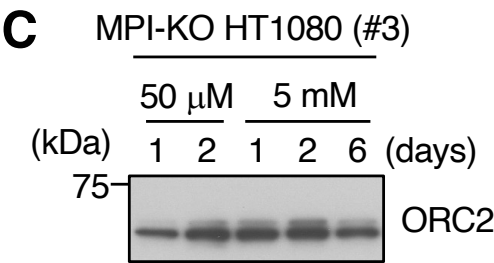

Supplement: fig3-data4 [file elife-83870-fig3-data4-v1.zip]

Figure 4-source data 1

Whole cell lysate

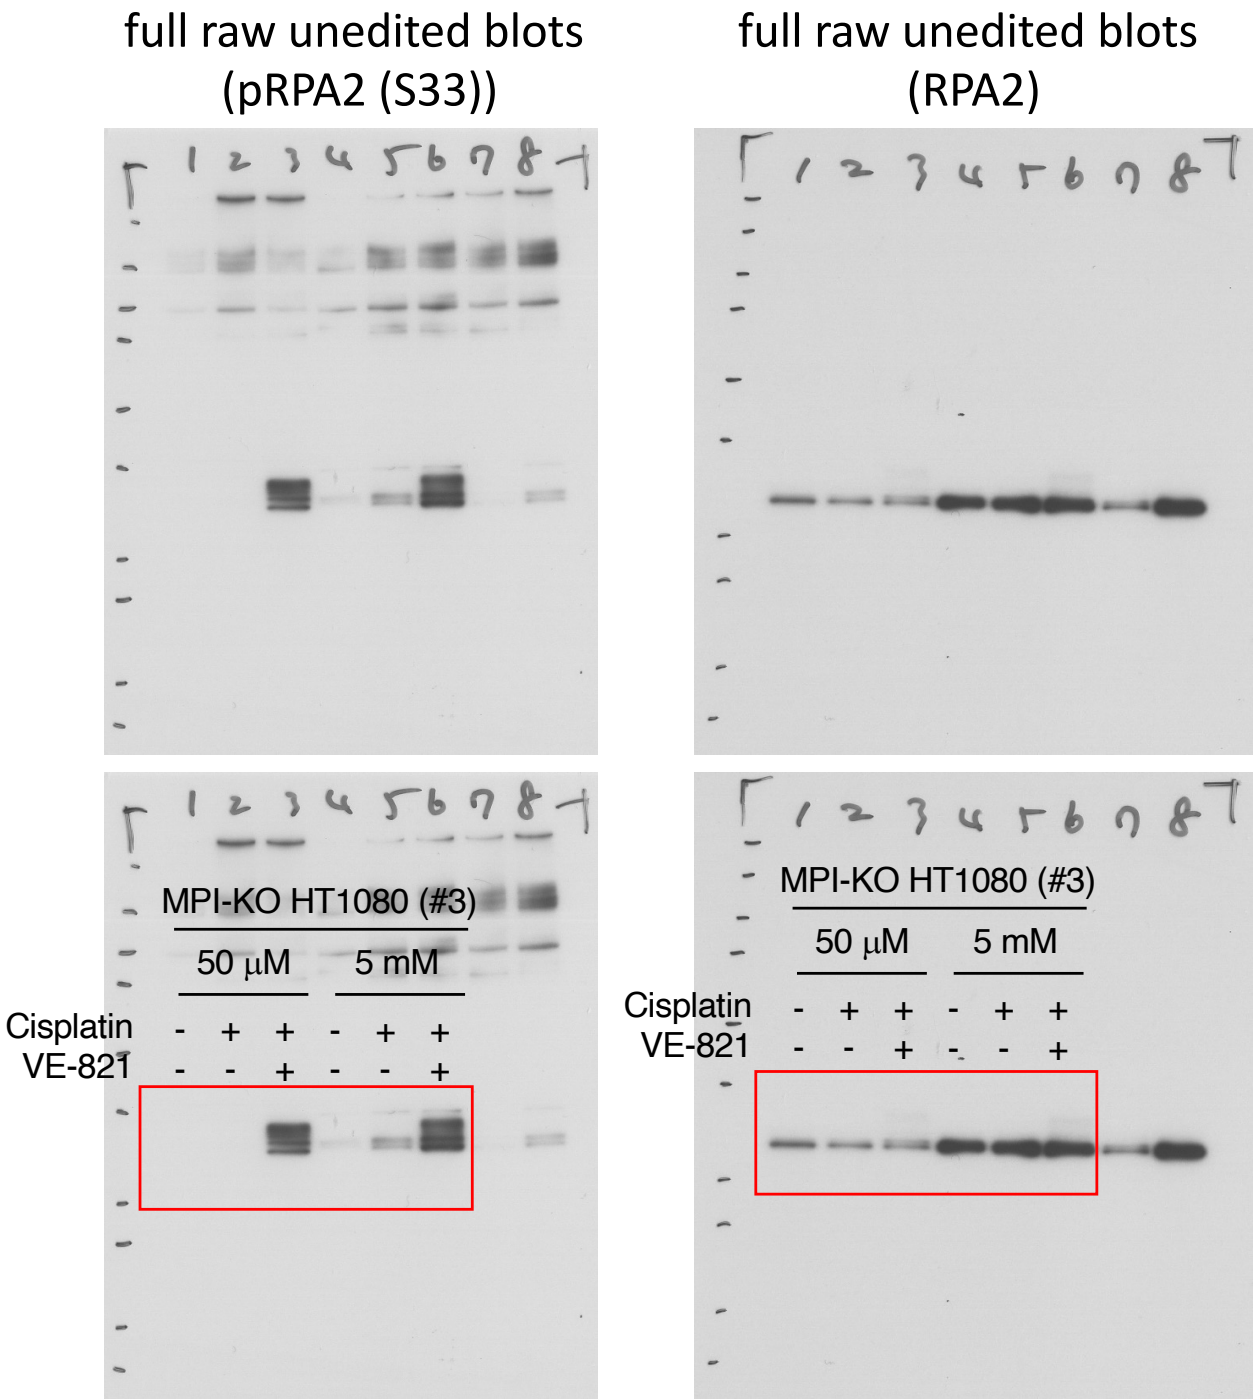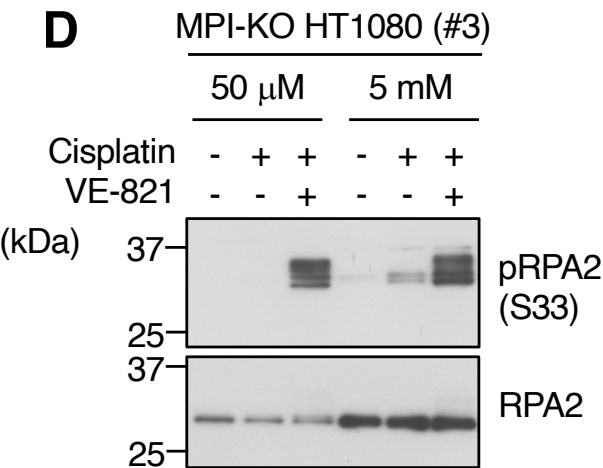

Supplement: fig4-data1 [file elife-83870-fig4-data1-v1.zip]

Figure 4-source data 2

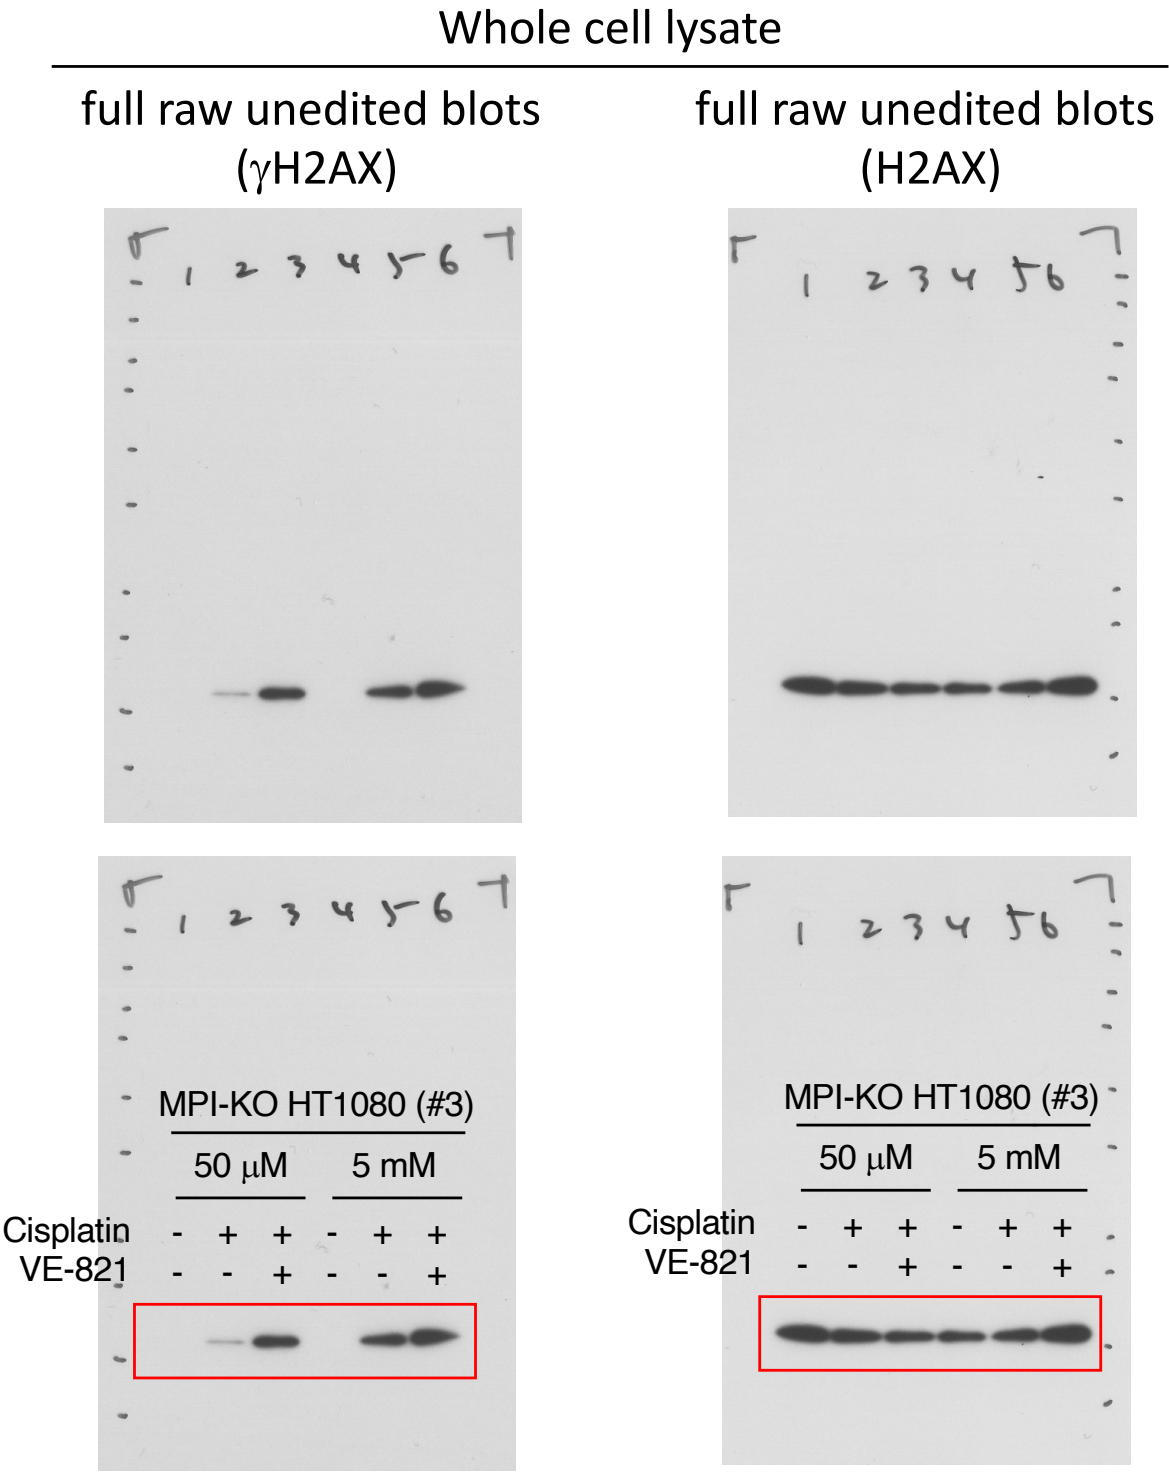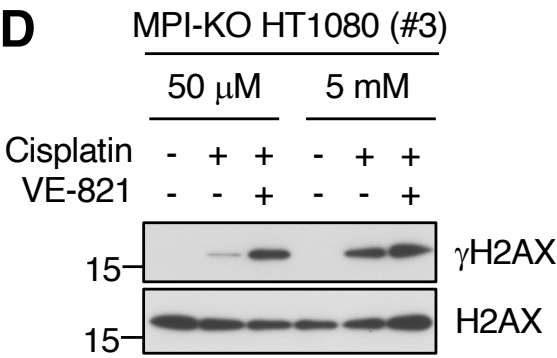

Supplement: fig4-data2 [file elife-83870-fig4-data2-v1.zip]

Figure 4-source data 3

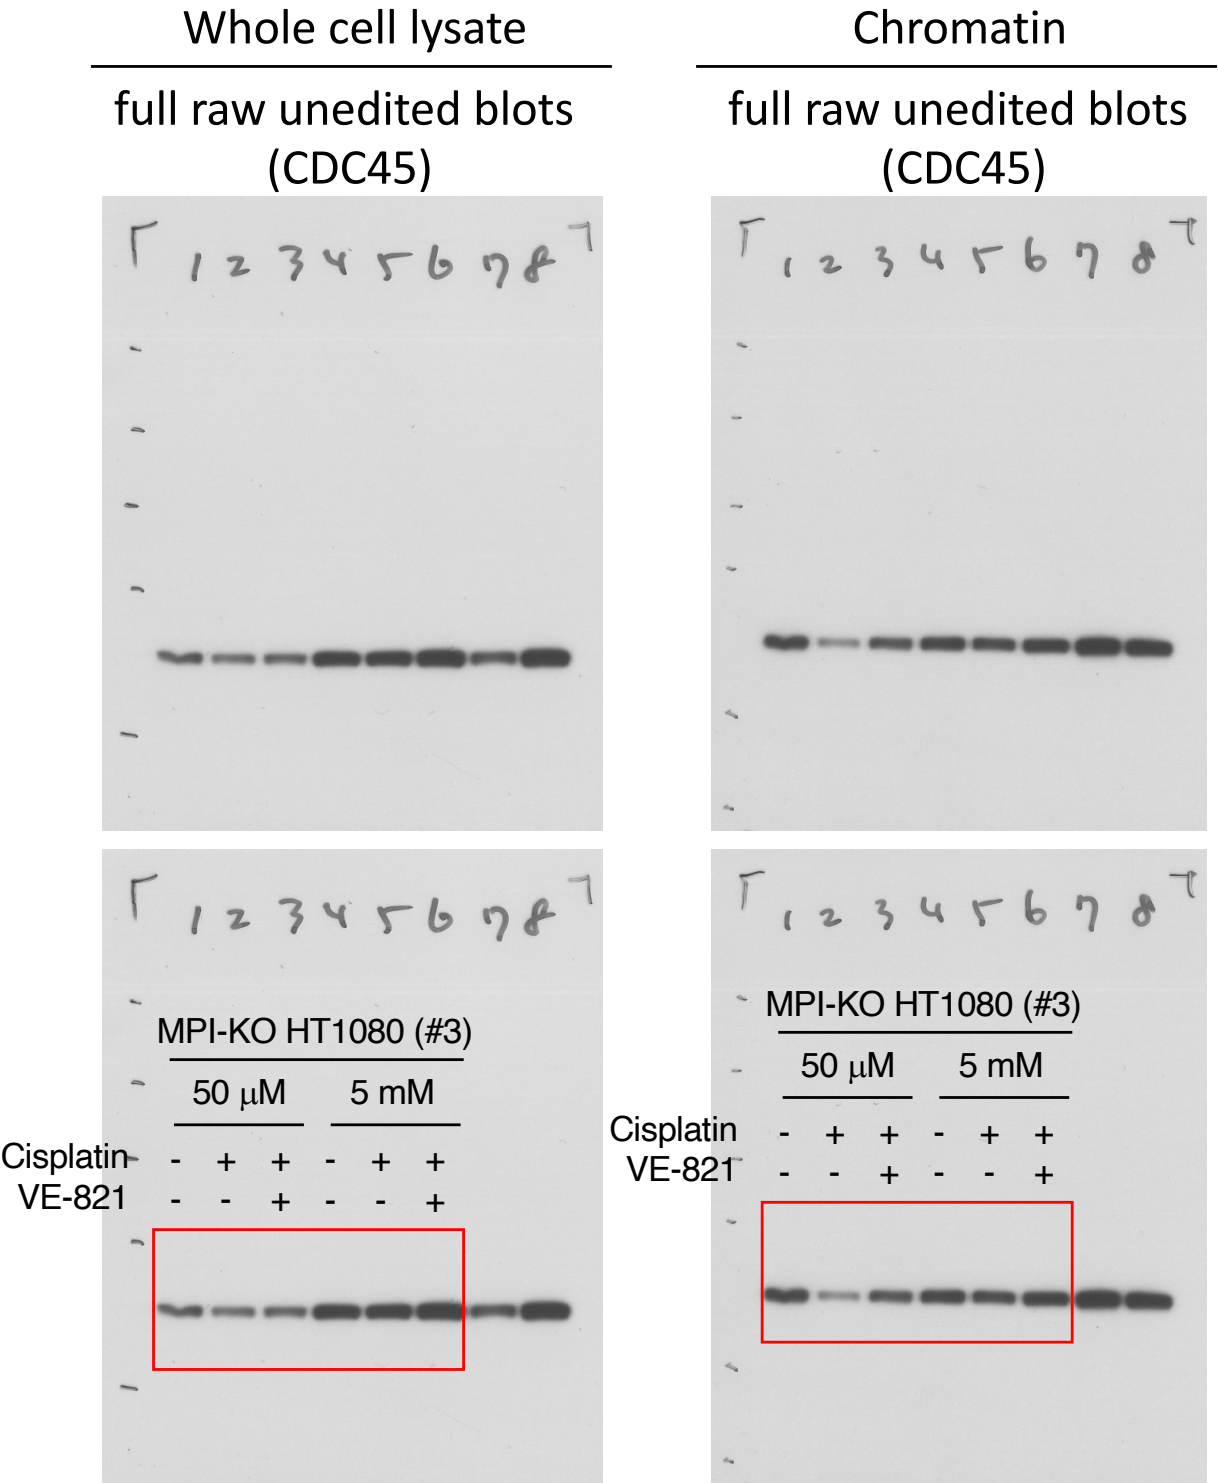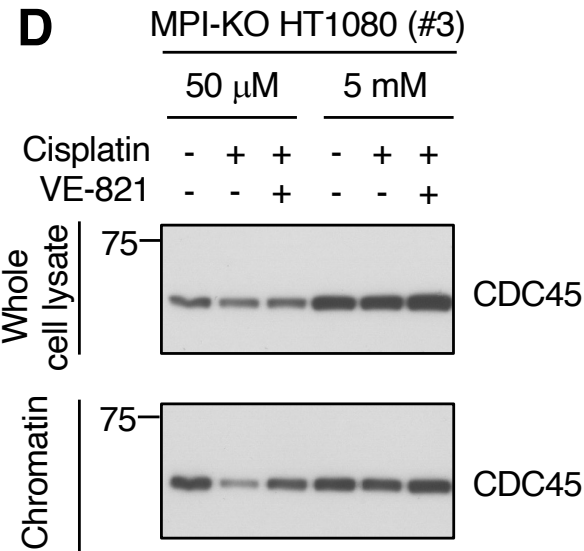

Supplement: fig4-data3 [file elife-83870-fig4-data3-v1.zip]

Figure 4-source data 4

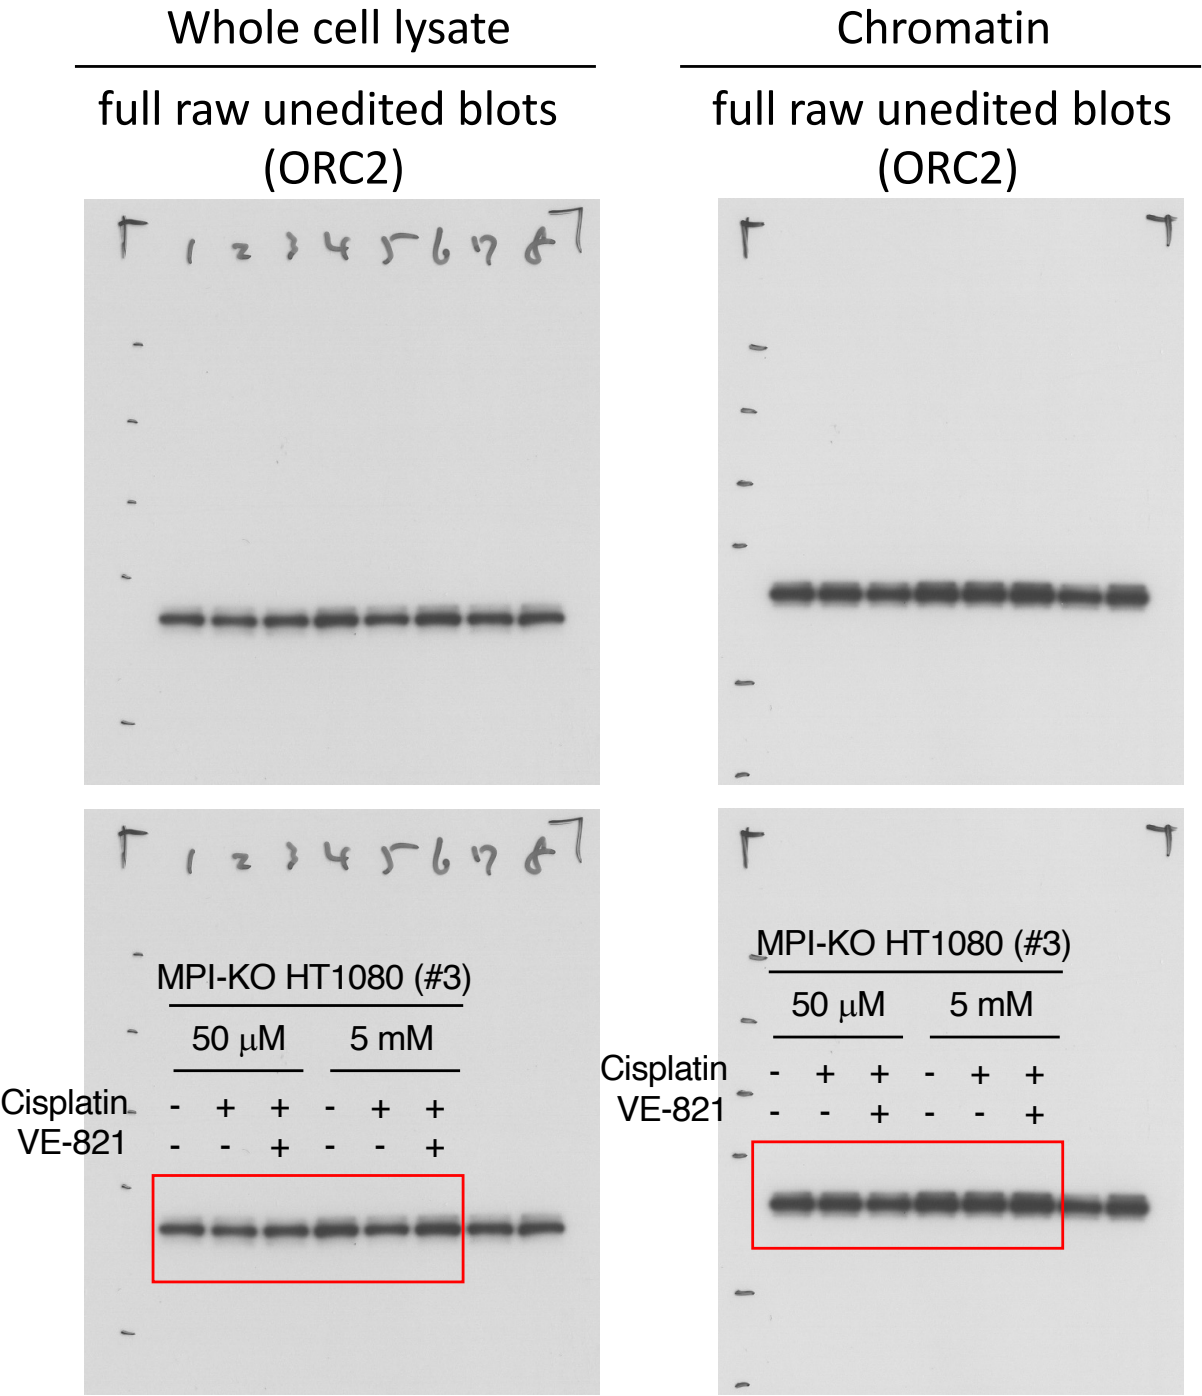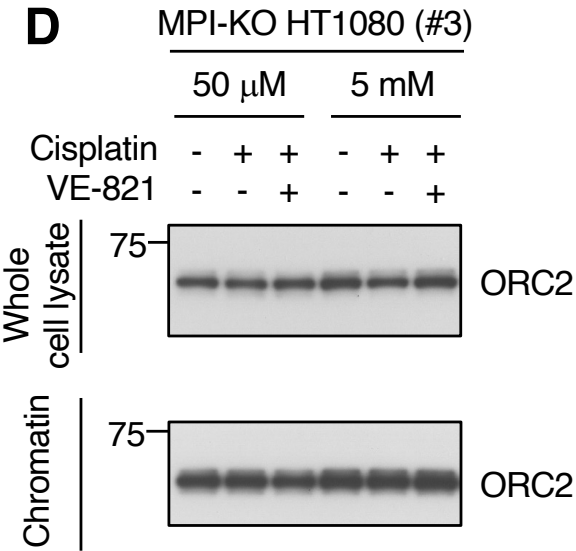

Supplement: fig4-data4 [file elife-83870-fig4-data4-v1.zip]

Figure XX-figure supplement YY-source data 1

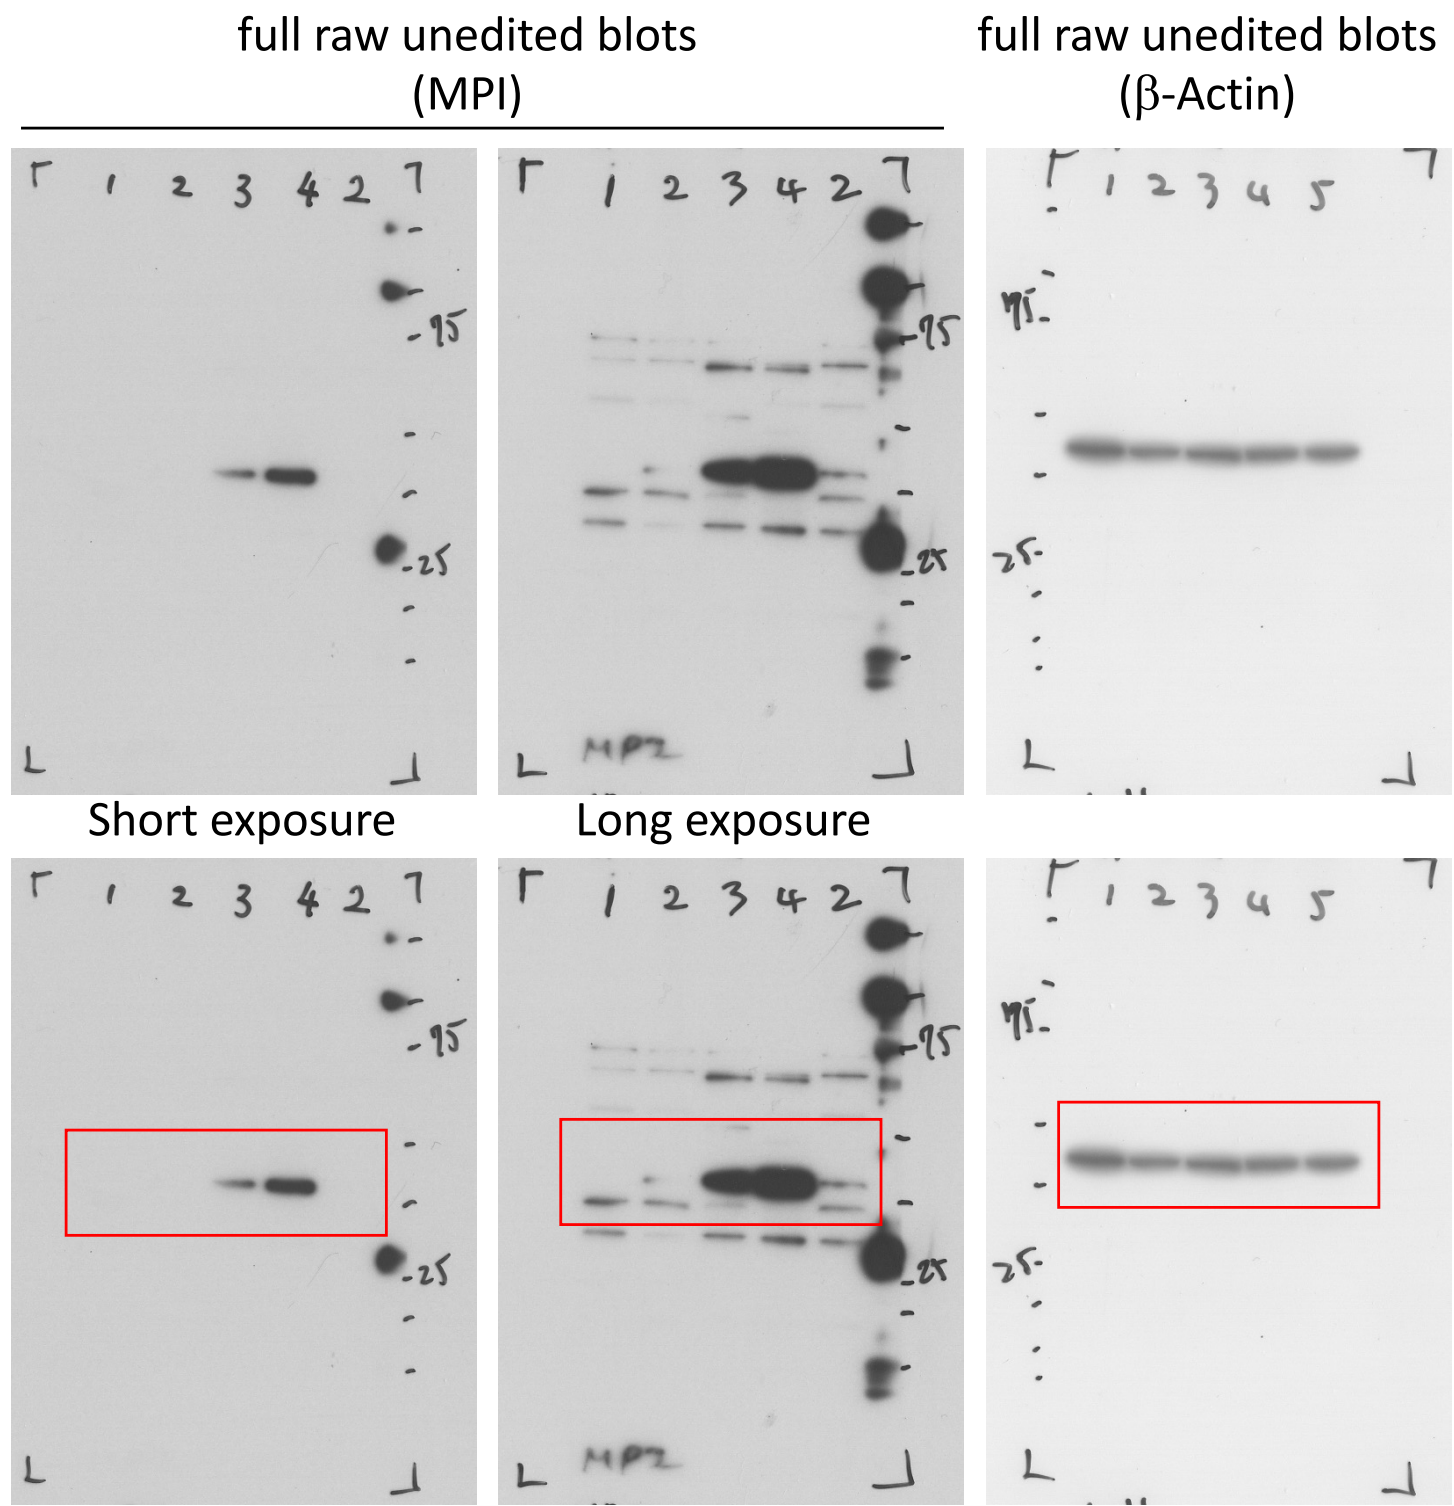

**A**

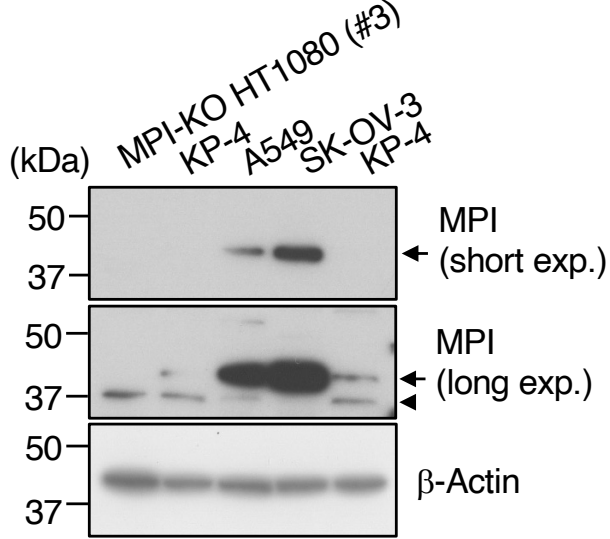

Supplement: fig4-figsupp3-data1 [file elife-83870-fig4-figsupp3-data1-v1.zip]

Figure 1-source data 1

full raw unedited blots ( $\beta$ -Actin)



full raw unedited blots (MPI)

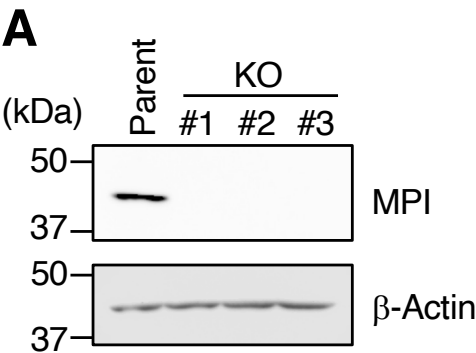

Supplement: fig4-figsupp3-data2 [file elife-83870-fig4-figsupp3-data2-v1.zip]

Figure 1-source data 1

full raw unedited blots ( $\beta$ -Actin)



full raw unedited blots (MPI)

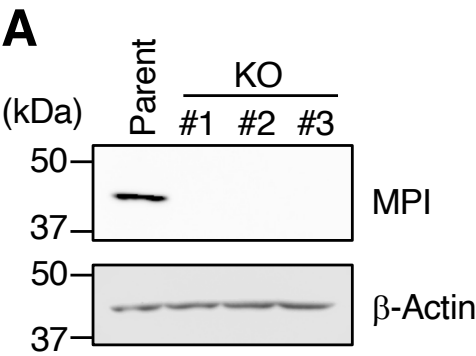

Supplement: fig4-figsupp3-data3 [file elife-83870-fig4-figsupp3-data3-v1.zip]

Figure 1-source data 1

full raw unedited blots ( $\beta$ -Actin)



full raw unedited blots (MPI)

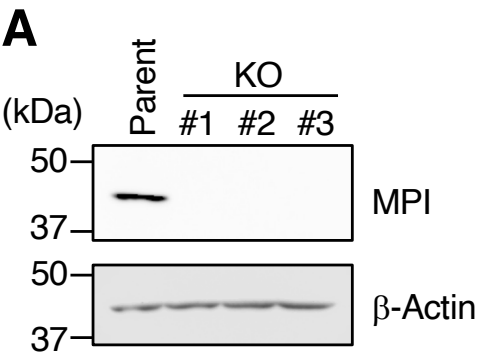

Supplement: fig4-figsupp3-data4 [file elife-83870-fig4-figsupp3-data4-v1.zip]

Figure 1-source data 1

full raw unedited blots ( $\beta$ -Actin)



full raw unedited blots (MPI)

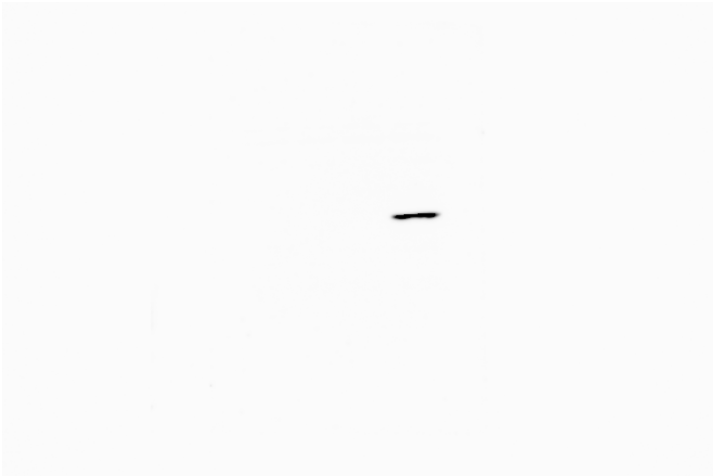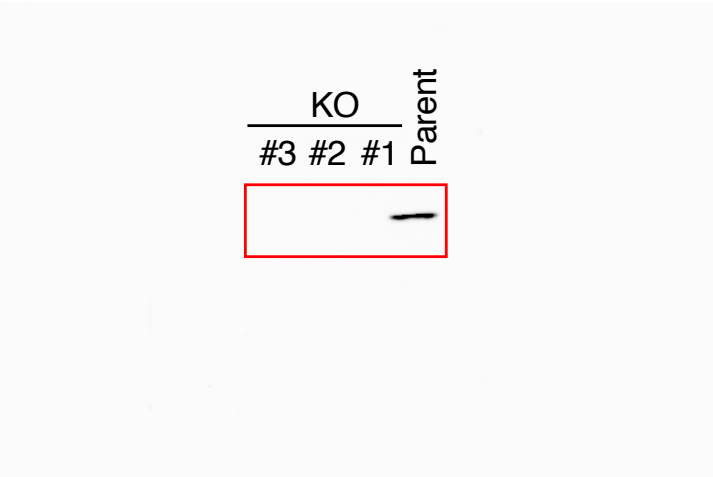

Supplement: fig4-figsupp3-data5 [file elife-83870-fig4-figsupp3-data5-v1.zip]

Figure 7-source data 3

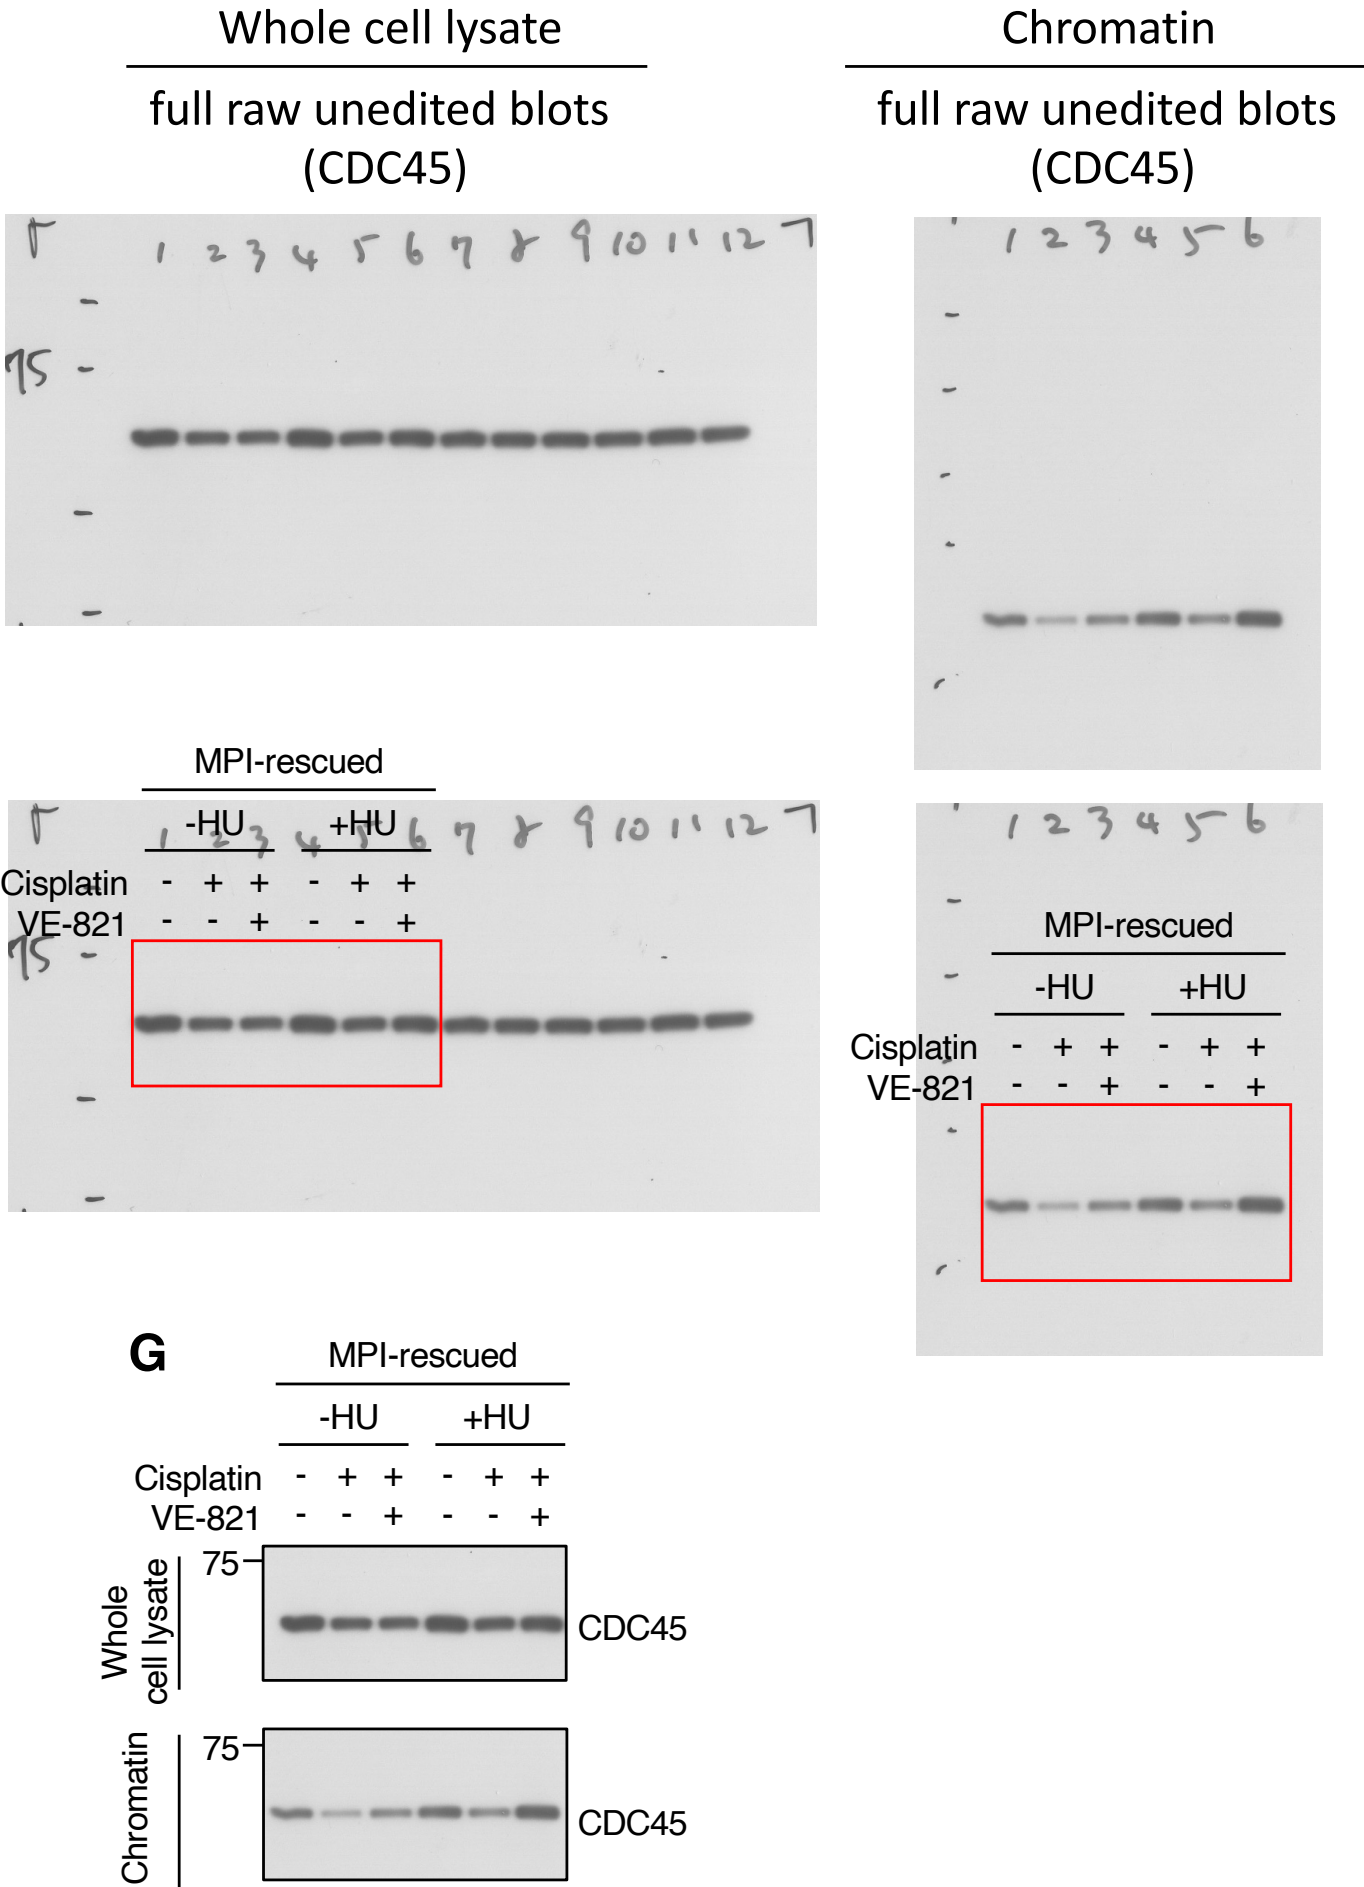

Supplement: fig7-data3 [file elife-83870-fig7-data3-v1.zip]

Figure 7-source data 4

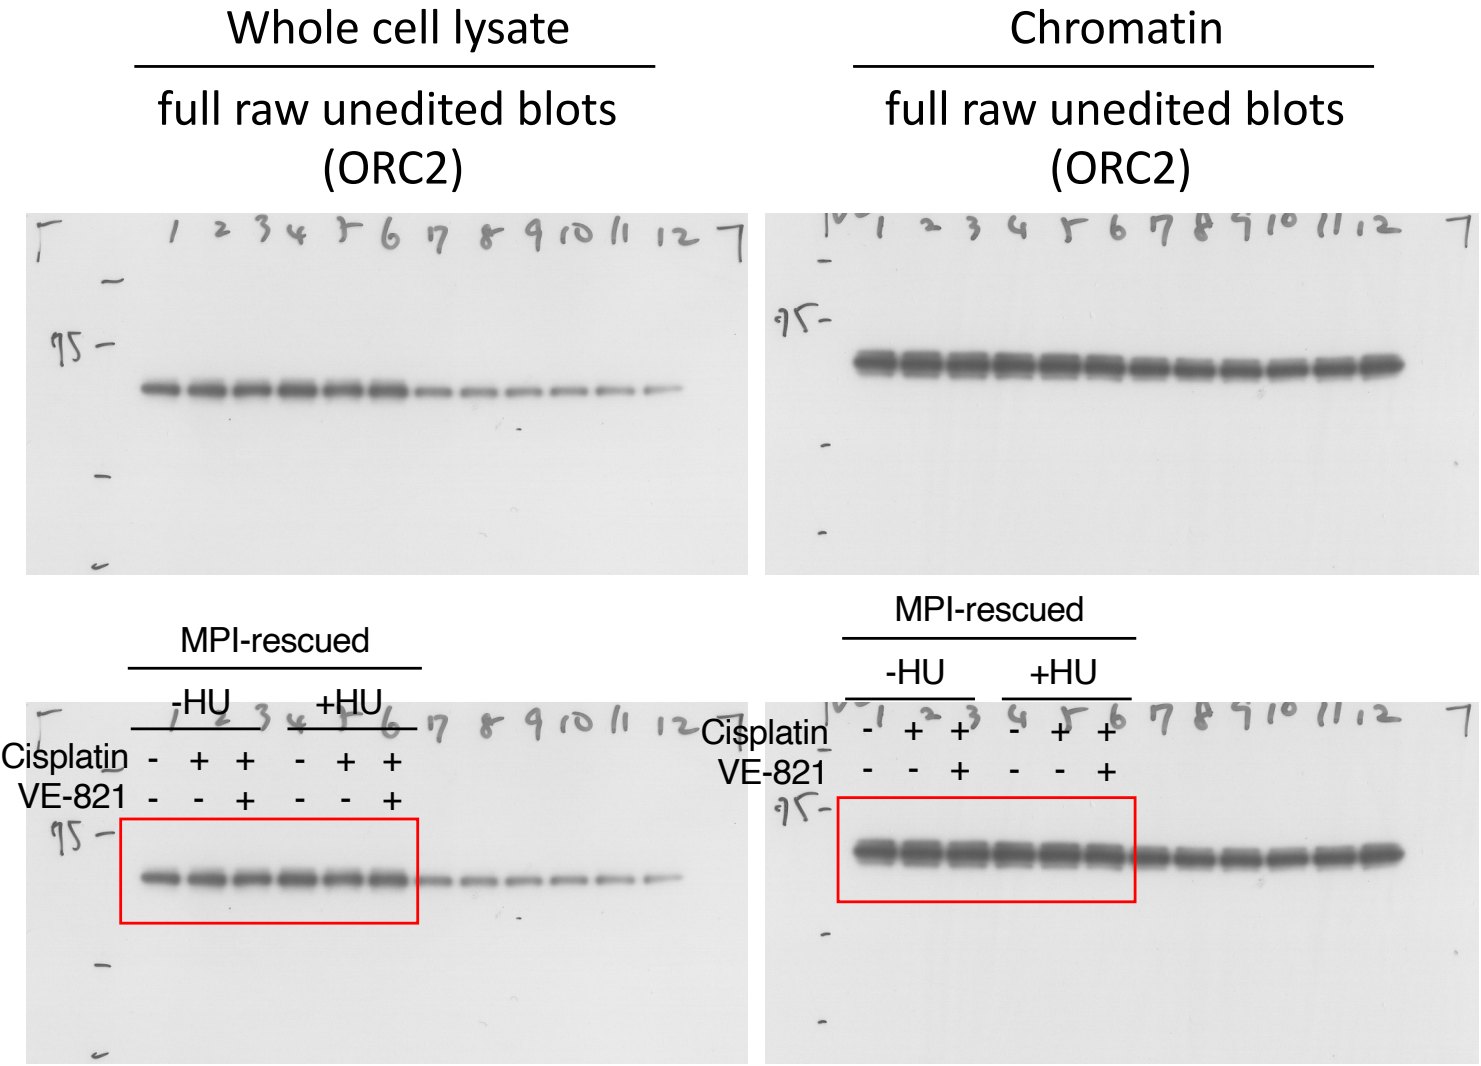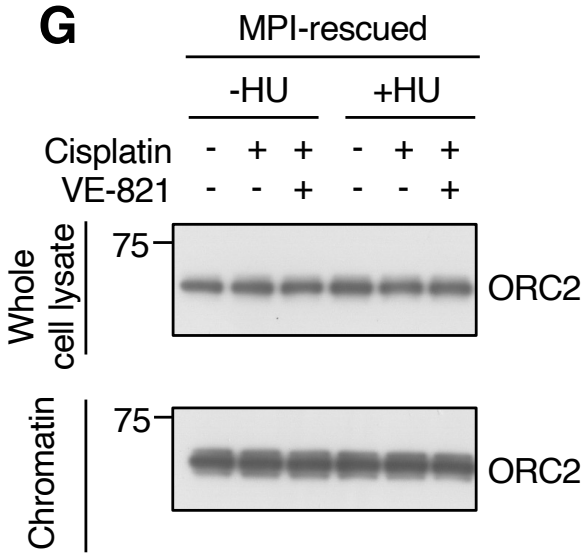

Supplement: fig7-data4 [file elife-83870-fig7-data4-v1.zip]
